# Supplementary material for: Acid-catalysed formation of tricyclic N,S-acetals in imidazolinone series based on the use of the unprecedented N-acyliminium ion cascade reaction involving transposition, heterocyclisation and π-cyclisation
Source: Royal Society of Chemistry journal article supplement (doi:10.1039/b508214e), 2005-01-01

for the manuscript

# Acid-catalysed formation of tricyclic *N,S*-acetals in imidazolinone series based on the use of the unprecedented *N*-acyliminium ion cascade reaction involving transposition, heterocyclisation and $\pi$ -cyclisation

By

*Anthony Pesquet,<sup>a</sup> Adam Daïch,<sup>a\*</sup> Bernard Decroix,<sup>a</sup> and Luc Van Hijfte<sup>b</sup>*

<sup>a</sup>URCOM, EA 3221, UFR des Sciences & Techniques de l'Université du Havre, B.P: 540, 25 rue Philippe Lebon, F-76058 Le Havre Cedex, France,  
and

<sup>b</sup>Johnson & Johnson, Pharmaceutical Research & Development, Division of Janssen-Cilag, Campus de Maigremont, B.P: 615, F-27106 Val-de-Reuil Cedex, France

## SUMMARY

|                                                                                                             |              |
|-------------------------------------------------------------------------------------------------------------|--------------|
| <b>1-Chloromethyl-5,5-dimethylhydantoin (2).</b>                                                            | <b>05-06</b> |
| <b>5,5-Dimethyl-1-phenylthiomethylhydantoin (3a).</b>                                                       | <b>07-08</b> |
| <b>1-(<i>o</i>-Bromophenyl)thiomethyl-5,5-dimethylhydantoin (3c).</b>                                       | <b>09-10</b> |
| <b>1-(<i>o</i>-Methoxyphenyl)thiomethyl-5,5-dimethylhydantoin (3d).</b>                                     | <b>11-12</b> |
| <b>1-(<i>m</i>-Methoxyphenyl)thiomethyl-5,5-dimethylhydantoin (3e).</b>                                     | <b>12-14</b> |
| <b>1-(<i>p</i>-Methoxyphenyl)thiomethyl-5,5-dimethylhydantoin (3f).</b>                                     | <b>15-16</b> |
| <b>1-(<i>p</i>-Chlorophenyl)thiomethyl-5,5-dimethylhydantoin (3g).</b>                                      | <b>17-18</b> |
| <b>5,5-Dimethyl-1-(<math>\beta</math>-naphthyl)thiomethylhydantoin (3h).</b>                                | <b>19-20</b> |
| <b>1-(<i>m,p</i>-Dimethoxyphenyl)thiomethyl-5,5-dimethylhydantoin (3i).</b>                                 | <b>21-22</b> |
| <b>3-<sup>t</sup>Butyloxycarbonyl-5,5-dimethyl-1-phenylthiomethylhydantoin (4b).</b>                        | <b>23-24</b> |
| <b>1-(<i>o</i>-Bromophenyl)thiomethyl-3-<sup>t</sup>butyloxycarbonyl-5,5-dimethylhydantoin (4c).</b>        | <b>25-26</b> |
| <b>3-<sup>t</sup>Butyloxycarbonyl-1-(<i>o</i>-methoxyphenyl)thiomethyl-5,5-dimethylhydantoin (4d).</b>      | <b>27-28</b> |
| <b>3-<sup>t</sup>Butyloxycarbonyl-1-(<i>m</i>-methoxyphenyl)thiomethyl-5,5-dimethylhydantoin (4e).</b>      | <b>29-30</b> |
| <b>3-<sup>t</sup>Butyloxycarbonyl-1-(<i>p</i>-methoxyphenyl)thiomethyl-5,5-dimethylhydantoin (4f).</b>      | <b>31-32</b> |
| <b>3-<sup>t</sup>Butyloxycarbonyl-1-(<i>p</i>-chlorophenyl)thiomethyl-5,5-dimethylhydantoin (4g).</b>       | <b>33-34</b> |
| <b>3-<sup>t</sup>Butyloxycarbonyl-5,5-dimethyl-1-(<math>\beta</math>-naphthyl)thiomethylhydantoin (4h).</b> | <b>35-36</b> |
| <b>3-<sup>t</sup>Butyloxycarbonyl-1-(<i>m,p</i>-dimethoxyphenyl)thiomethyl-5,5-dimethylhydantoin (4i).</b>  | <b>37-38</b> |
| <b>3,5,5-Trimethyl-1-phenylthiomethylhydantoin (4j).</b>                                                    | <b>39-40</b> |
| <b>3-Benzyl-5,5-dimethyl-1-phenylthiomethylhydantoin (4k).</b>                                              | <b>41-42</b> |

|                                                                                                                                   |       |
|-----------------------------------------------------------------------------------------------------------------------------------|-------|
| 4-Hydroxy-5,5-dimethyl-1-phenylthiomethylimidazolidin-2-one (5a).                                                                 | 43-44 |
| 3- <sup>t</sup> Butyloxycarbonyl-4-hydroxy-5,5-dimethyl-1-phenylthiomethylimidazolidin-2-one (5b).                                | 45-46 |
| 1-( <i>o</i> -Bromophenyl)thiomethyl-3- <sup>t</sup> butyloxycarbonyl-4-hydroxy-5,5-dimethylimidazolidin-2-one (5c).              | 47-48 |
| 3- <sup>t</sup> Butyloxycarbonyl-4-hydroxy-1-( <i>o</i> -methoxyphenyl)thiomethyl-5,5-dimethylimidazolidin-2-one (5d).            | 49-50 |
| 3- <sup>t</sup> Butyloxycarbonyl-4-hydroxy-1-( <i>m</i> -methoxyphenyl)thiomethyl-5,5-dimethylimidazolidin-2-one (5e).            | 51-52 |
| 3- <sup>t</sup> Butyloxycarbonyl-4-hydroxy-1-( <i>p</i> -methoxyphenyl)thiomethyl-5,5-dimethylimidazolidin-2-one (5f).            | 53-54 |
| 3- <sup>t</sup> Butyloxycarbonyl-1-( <i>p</i> -chlorophenyl)thiomethyl-4-hydroxy-5,5-dimethylimidazolidin-2-one (5g).             | 55-56 |
| 3- <sup>t</sup> Butyloxycarbonyl-4-hydroxy-5,5-dimethyl-1-( $\beta$ -naphthyl)thiomethylimidazolidin-2-one (5h).                  | 57-58 |
| 3- <sup>t</sup> Butyloxycarbonyl-4-hydroxy-1-( <i>m,p</i> -dimethoxyphenyl)thiomethyl-5,5-dimethylimidazolidin-2-one (5i).        | 59-60 |
| 4-Hydroxy-3,5,5-trimethyl-1-phenylthiomethylimidazolidin-2-one (5j).                                                              | 61-62 |
| 3-Benzyl-4-hydroxy-5,5-dimethyl-1-phenylthiomethylimidazolidin-2-one (5k).                                                        | 63-64 |
|                                                                                                                                   |       |
| 2,3,3 <i>a</i> ,9-Tetrahydro-3,3-dimethylimidazo[5,1- <i>b</i> ][1,3]benzothiazin-1-one (6a).                                     | 65-66 |
| 2- <sup>t</sup> butyloxycarbonyl-2,3,3 <i>a</i> ,9-tetrahydro-2,3,3-trimethylimidazo[5,1- <i>b</i> ][1,3]benzothiazin-1-one (6b). | 67-68 |
| 5-Bromo-2,3,3 <i>a</i> ,9-tetrahydro-3,3-dimethylimidazo[5,1- <i>b</i> ][1,3]benzothiazin-1-one (6c).                             | 69-70 |
| 2,3,3 <i>a</i> ,9-Tetrahydro-5-methoxy-3,3-dimethylimidazo[5,1- <i>b</i> ][1,3]benzothiazin-1-one (6d).                           | 71-72 |
| 2,3,3 <i>a</i> ,9-Tetrahydro-8-methoxy-3,3-dimethylimidazo[5,1- <i>b</i> ][1,3]benzothiazin-1-one (6e).                           | 73-74 |
| 2,3,3 <i>a</i> ,9-Tetrahydro-3,3-dimethylimidazo[5,1- <i>b</i> ][1,3]naphthen-1-one (6h).                                         | 75-76 |
| 2,3,3 <i>a</i> ,9-Tetrahydro-6,7-dimethoxy-3,3-dimethylimidazo[5,1- <i>b</i> ][1,3]benzothiazin-1-one (6i).                       | 77-78 |
| 2,3,3 <i>a</i> ,9-Tetrahydro-2,3,3-trimethylimidazo[5,1- <i>b</i> ][1,3]benzothiazin-1-one (6j).                                  | 79-80 |
| 2-Benzyl-2,3,3 <i>a</i> ,9-tetrahydro-3,3-dimethylimidazo[5,1- <i>b</i> ][1,3]benzothiazin-1-one (6k).                            | 81-82 |
|                                                                                                                                   |       |
| 3-( <i>o</i> -Ethylthiobenzyl)-5,5-dimethylhydantoin (9x).                                                                        | 83-84 |
| 3-( <i>o</i> -Benzylthiobenzyl)-5,5-dimethylhydantoin (9y).                                                                       | 85-86 |

|                                                                                                                   |                |
|-------------------------------------------------------------------------------------------------------------------|----------------|
| <b>3-(<i>o</i>-Ethylthiobenzyl)-4-hydroxy-5,5-dimethylimidazolidin-2-one (10x).</b>                               | <b>87-88</b>   |
| <b>3-(<i>o</i>-Benzylthiobenzyl)-4-hydroxy-5,5-dimethylimidazolidin-2-one (10y).</b>                              | <b>89-90</b>   |
| <b>1-(<i>o</i>-Ethylthiobenzyl)-4,5-dimethylimidazol-2(3<i>H</i>)-one (11x).</b>                                  | <b>91-“”</b>   |
| <br>                                                                                                              |                |
| <b>1,5,5-Trimethyl-3-phenylthiomethylhydantoin (14j).</b>                                                         | <b>93-94</b>   |
| <b>3-(<i>o</i>-Bromophenyl)thiomethyl-1,5,5-trimethylhydantoin (14l).</b>                                         | <b>95-96</b>   |
| <b>3-(<i>o</i>-Methoxyphenyl)thiomethyl-1,5,5-trimethylhydantoin (14m).</b>                                       | <b>97-98</b>   |
| <b>3-(<i>m,p</i>-Dimethoxyphenyl)thiomethyl-1,5,5-trimethylhydantoin (14n).</b>                                   | <b>99-100</b>  |
| <br>                                                                                                              |                |
| <b>4-Hydroxy-1,5,5-trimethyl-3-phenylthiomethylimidazolidin-2-one (15j).</b>                                      | <b>101-102</b> |
| <b>3-(<i>o</i>-Bromophenyl)thiomethyl-4-hydroxy-1,5,5-trimethylimidazolidin-2-one (15l).</b>                      | <b>103-104</b> |
| <b>4-Hydroxy-3-(<i>o</i>-methoxyphenyl)thiomethyl-1,5,5-trimethylimidazolidin-2-one (15m).</b>                    | <b>105-106</b> |
| <b>4-Hydroxy-3-(<i>m,p</i>-dimethoxyphenyl)thiomethyl-1,5,5-trimethylimidazolidin-2-one (15n).</b>                | <b>107-108</b> |
| <br>                                                                                                              |                |
| <b>5-Bromo-2,3,3<i>a</i>,9-tetrahydro-2,3,3-trimethylimidazo[5,1-<i>b</i>][1,3]benzothiazin-1-one (6l).</b>       | <b>109-110</b> |
| <b>2,3,3<i>a</i>,9-Tetrahydro-5-methoxy-2,3,3-trimethylimidazo[5,1-<i>b</i>][1,3]benzothiazin-1-one (6m).</b>     | <b>111-112</b> |
| <b>2,3,3<i>a</i>,9-Tetrahydro-6,7-dimethoxy-2,3,3-trimethylimidazo[5,1-<i>b</i>][1,3]benzothiazin-1-one (6n).</b> | <b>113-114</b> |

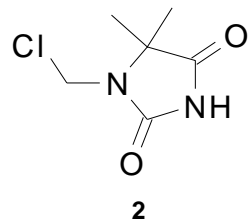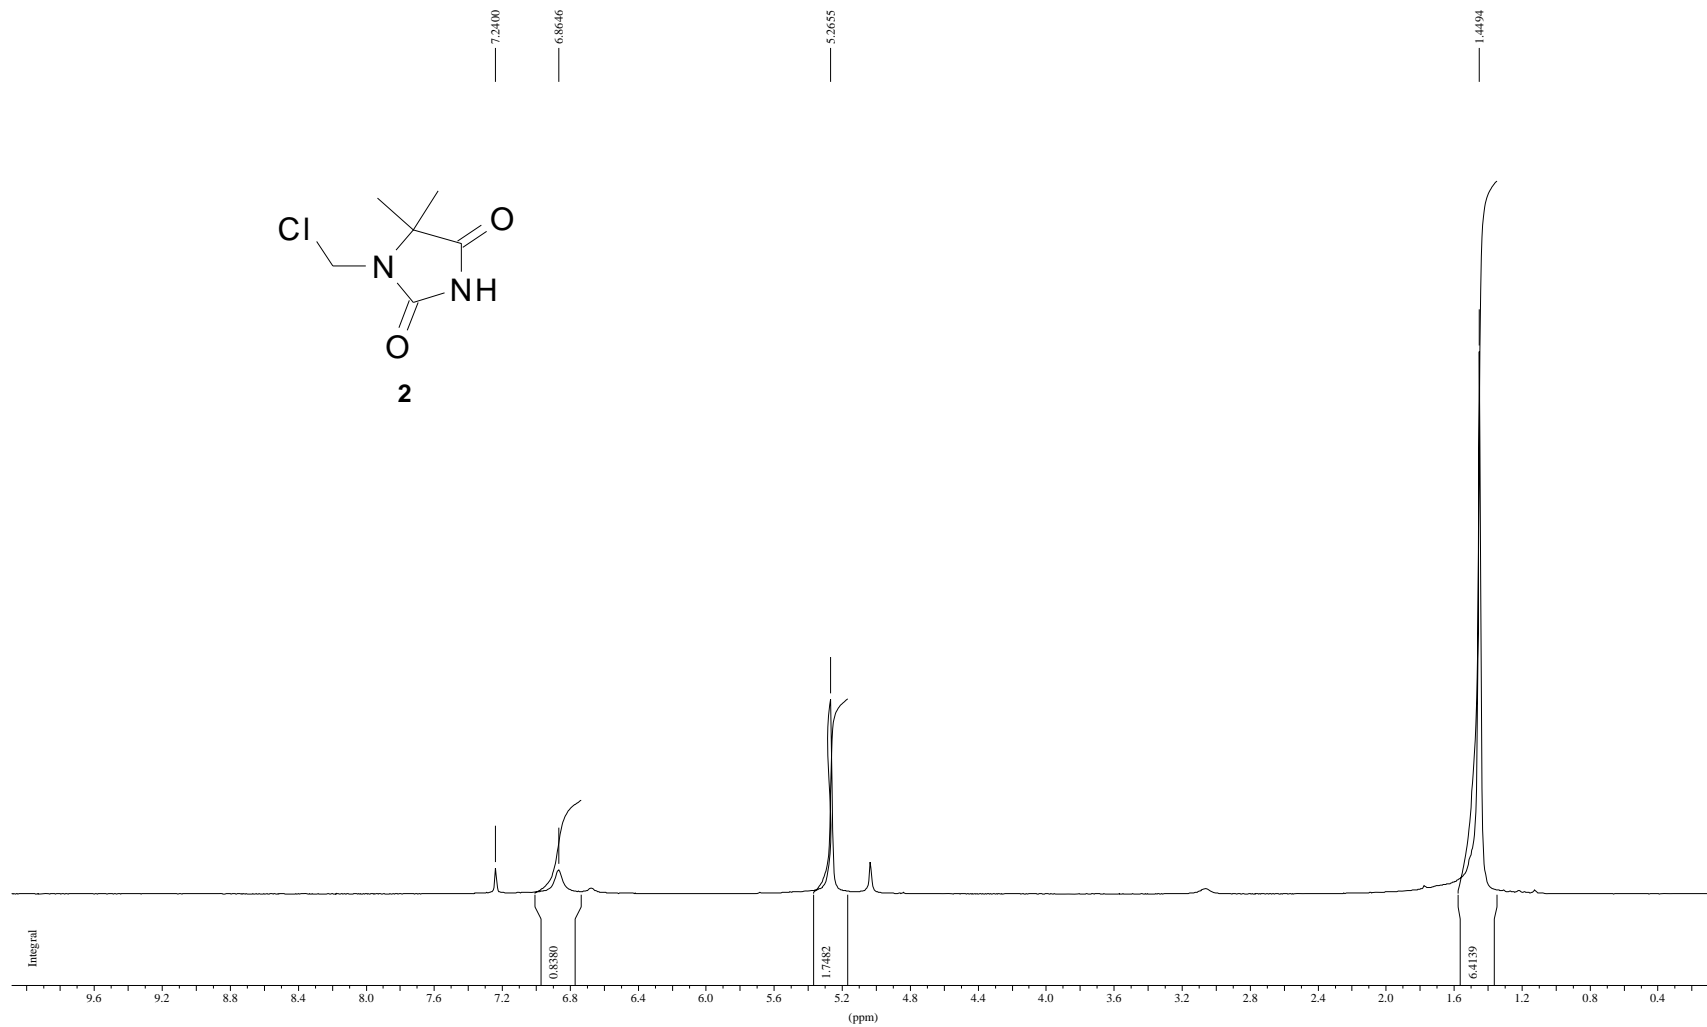

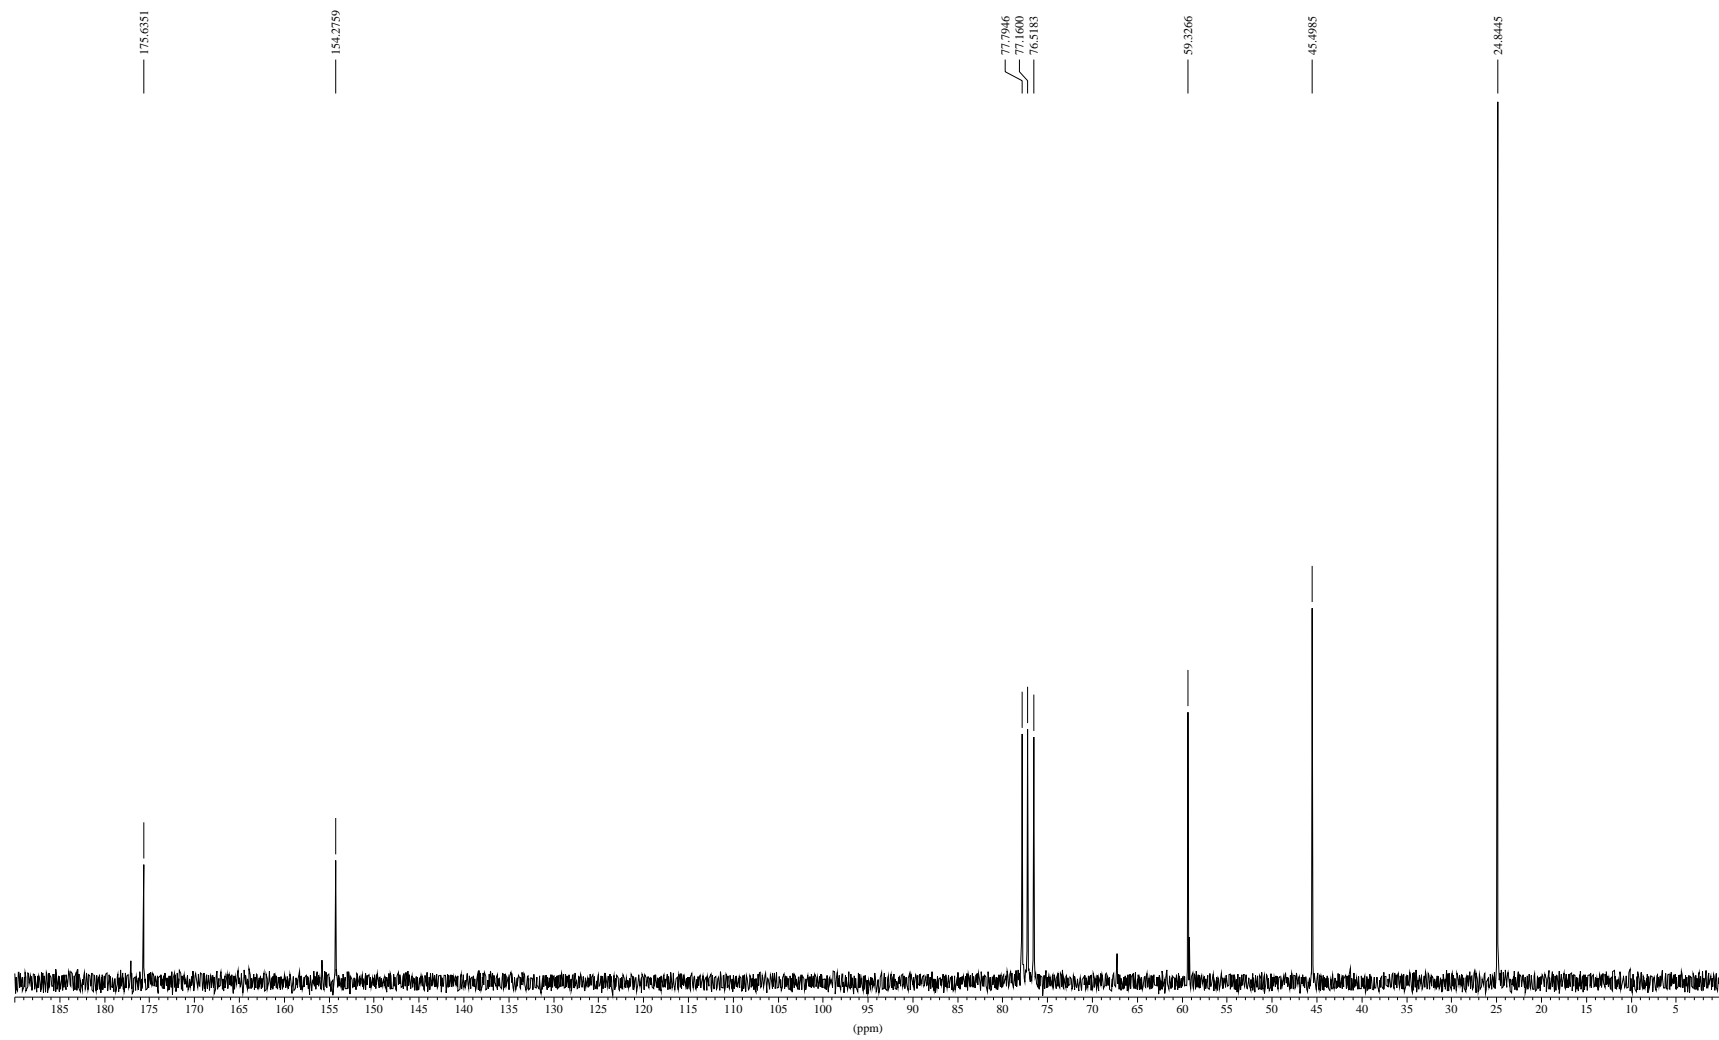

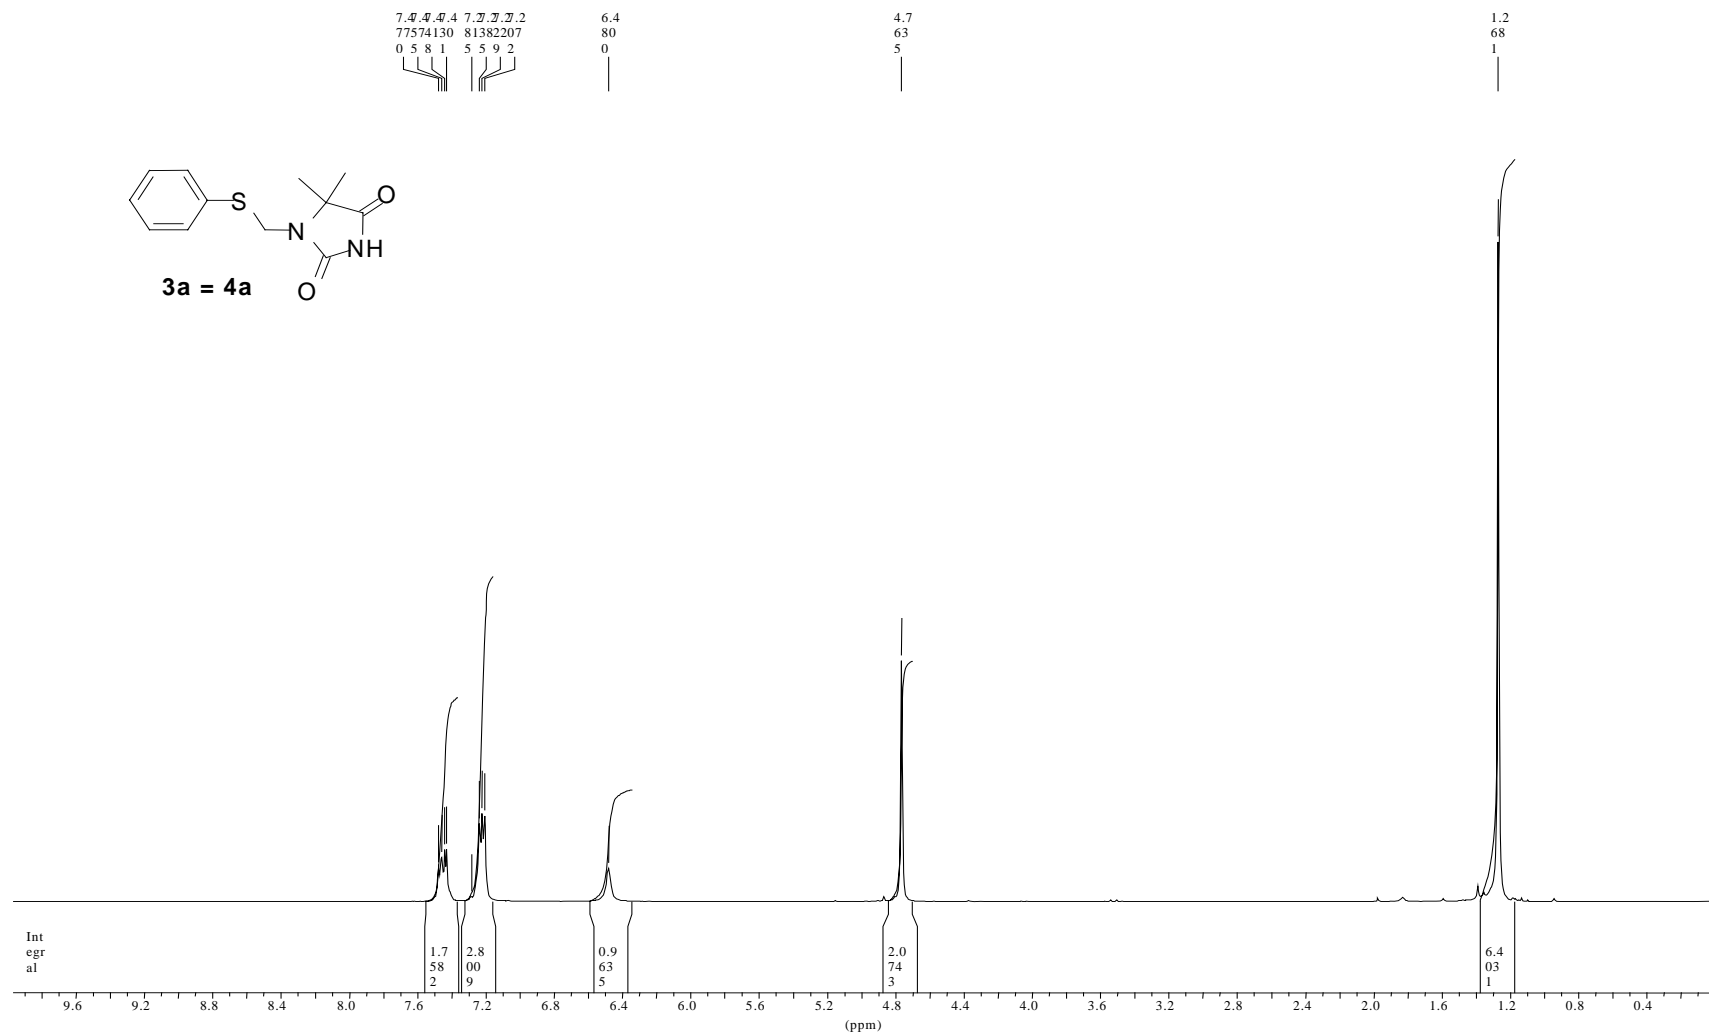

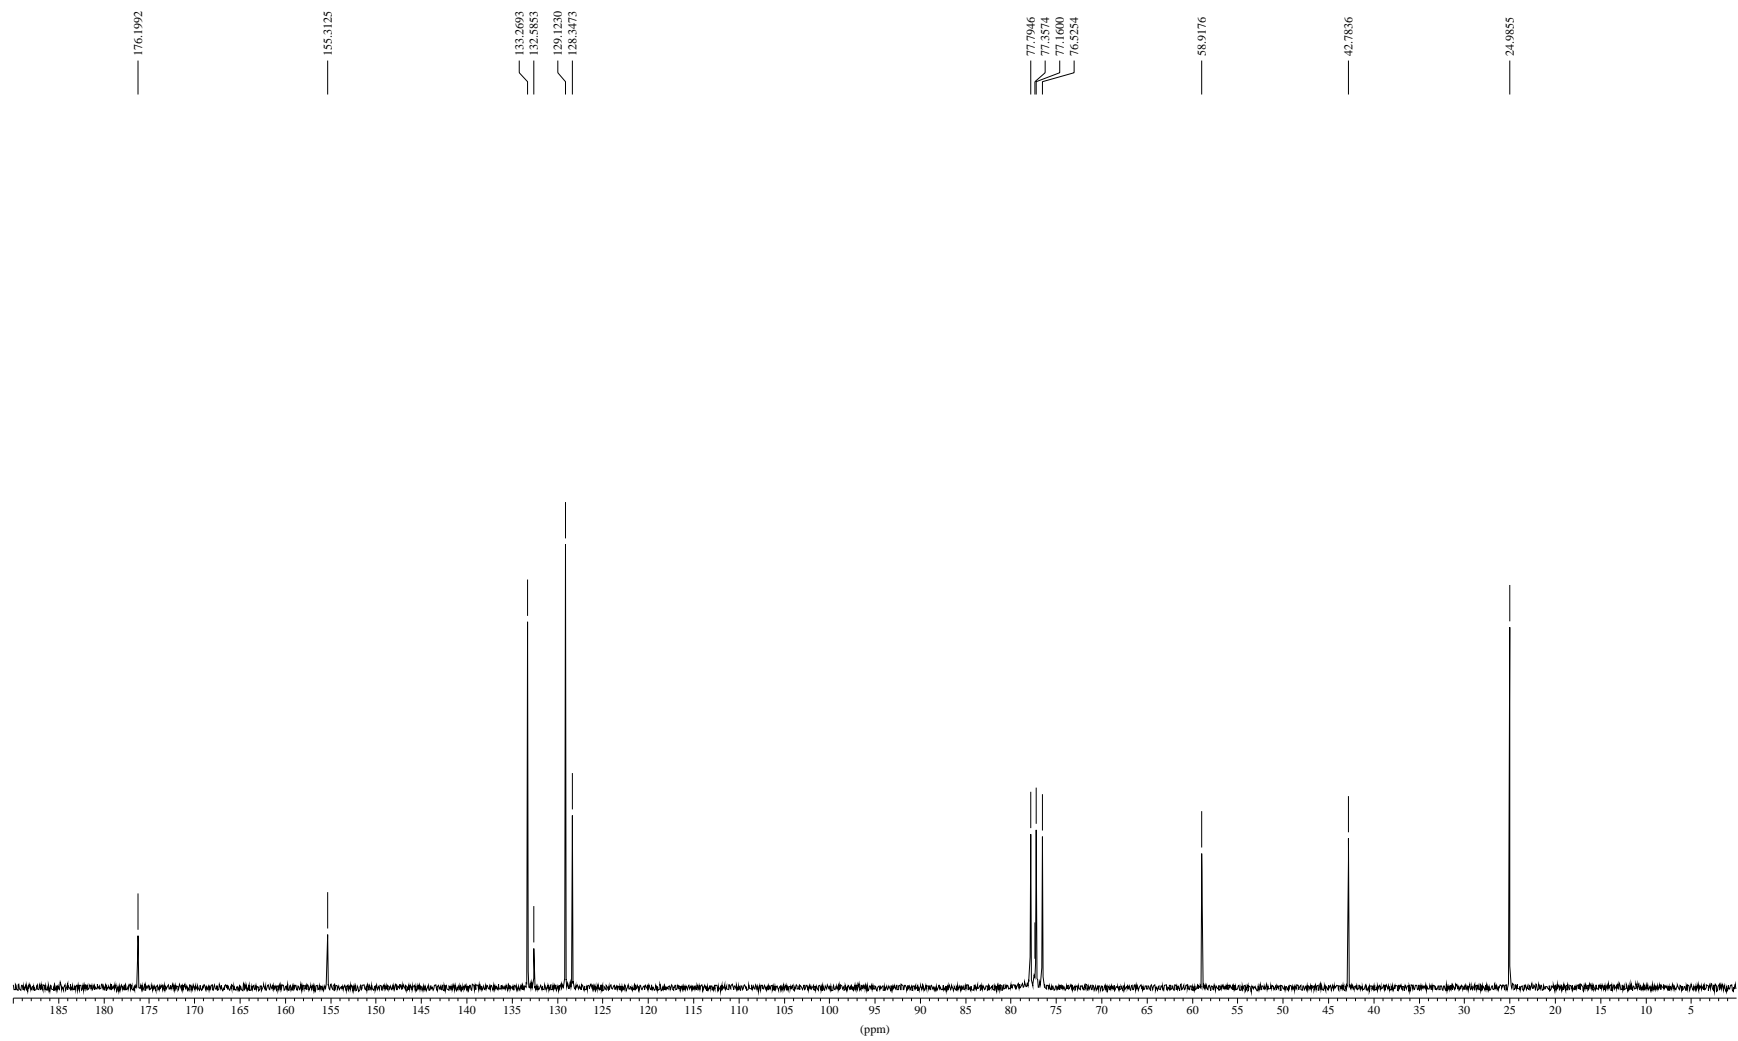



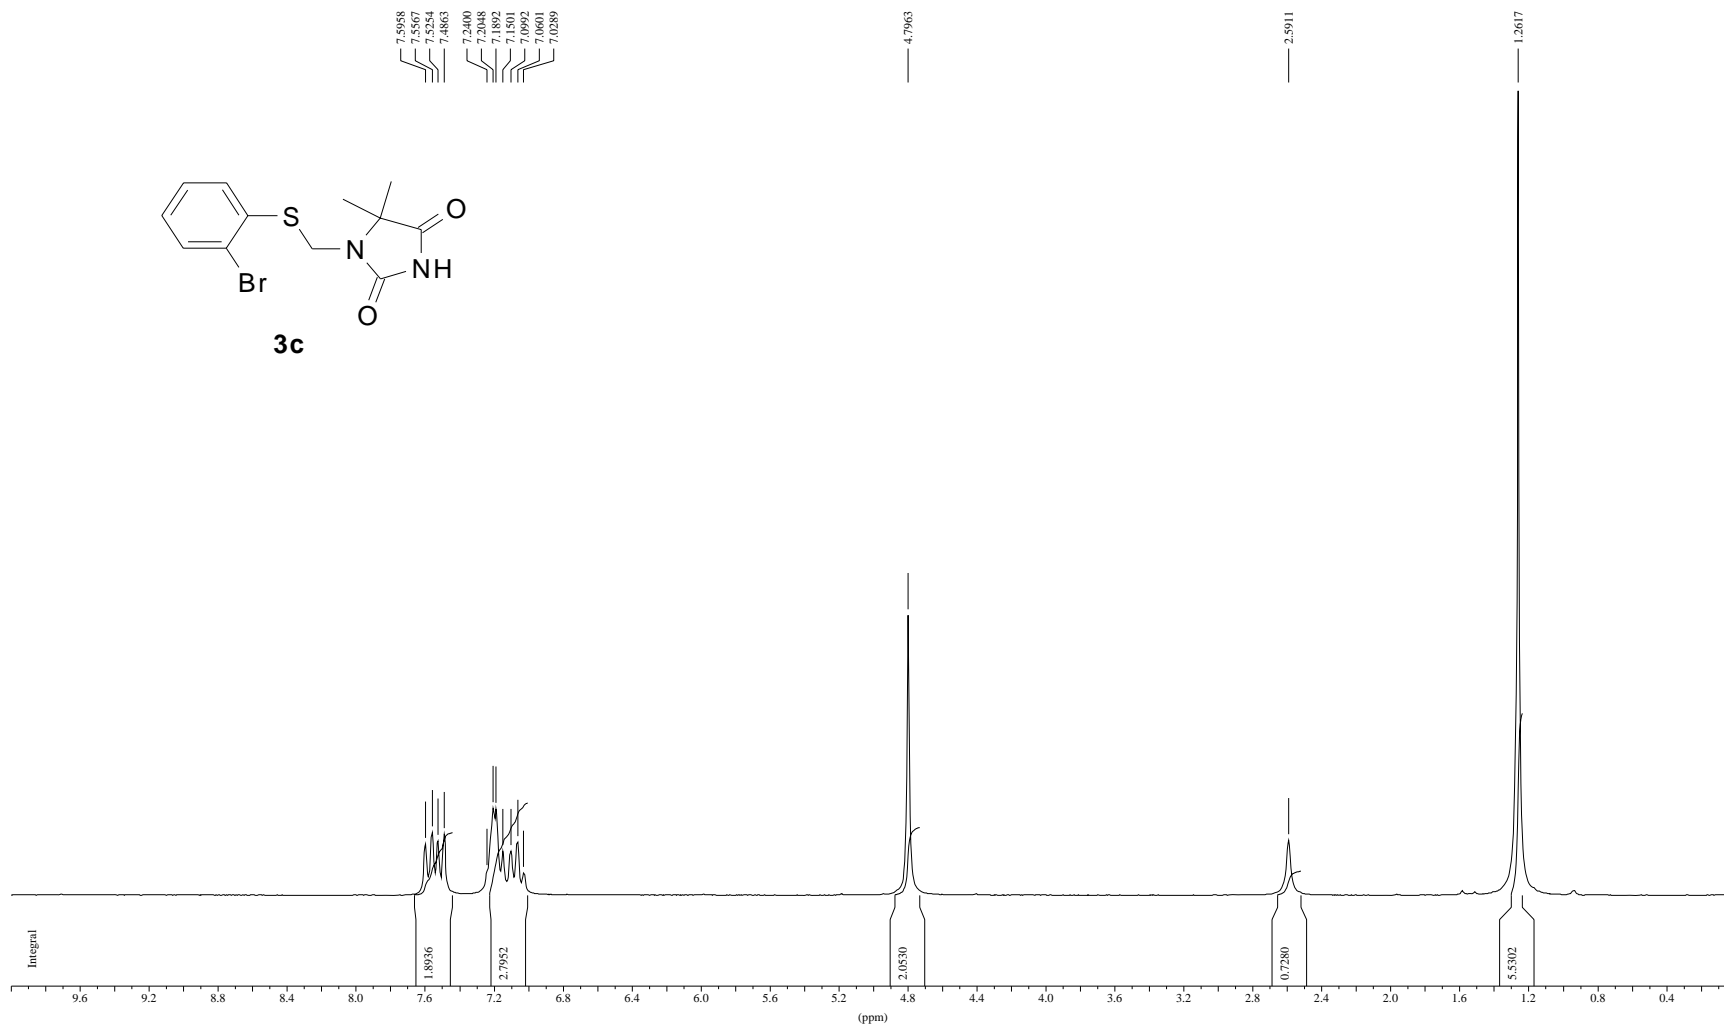

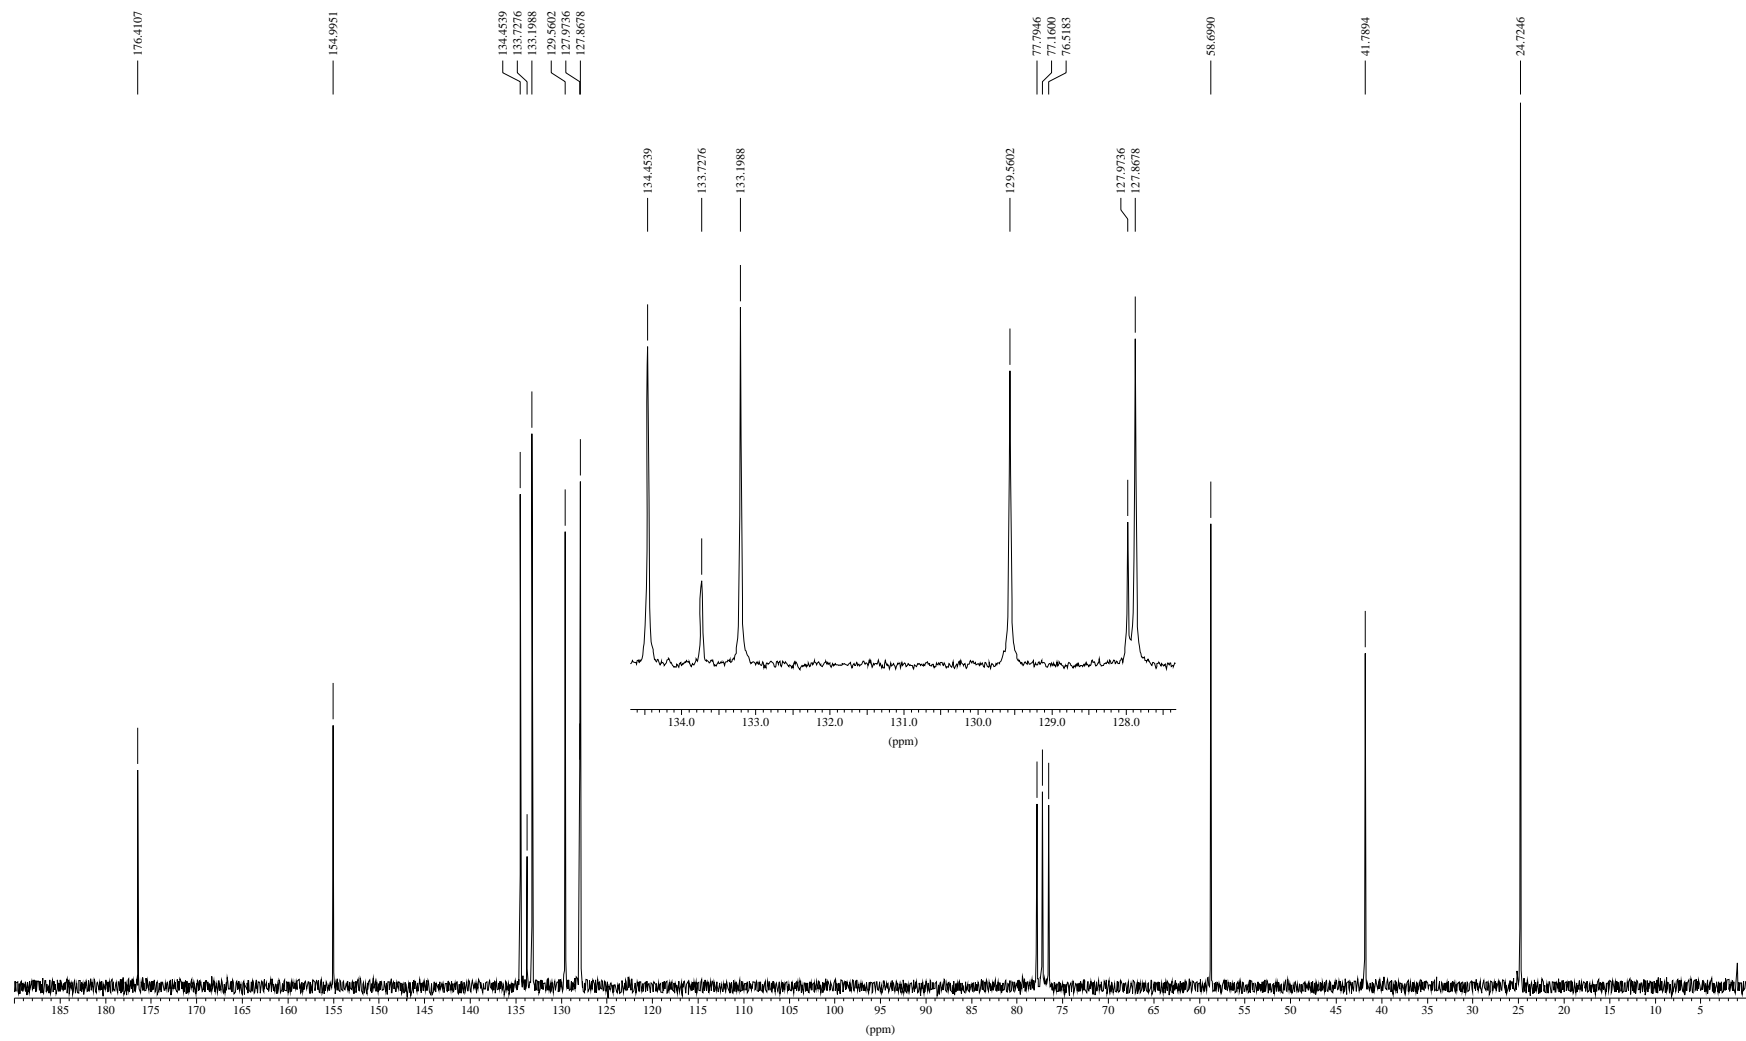

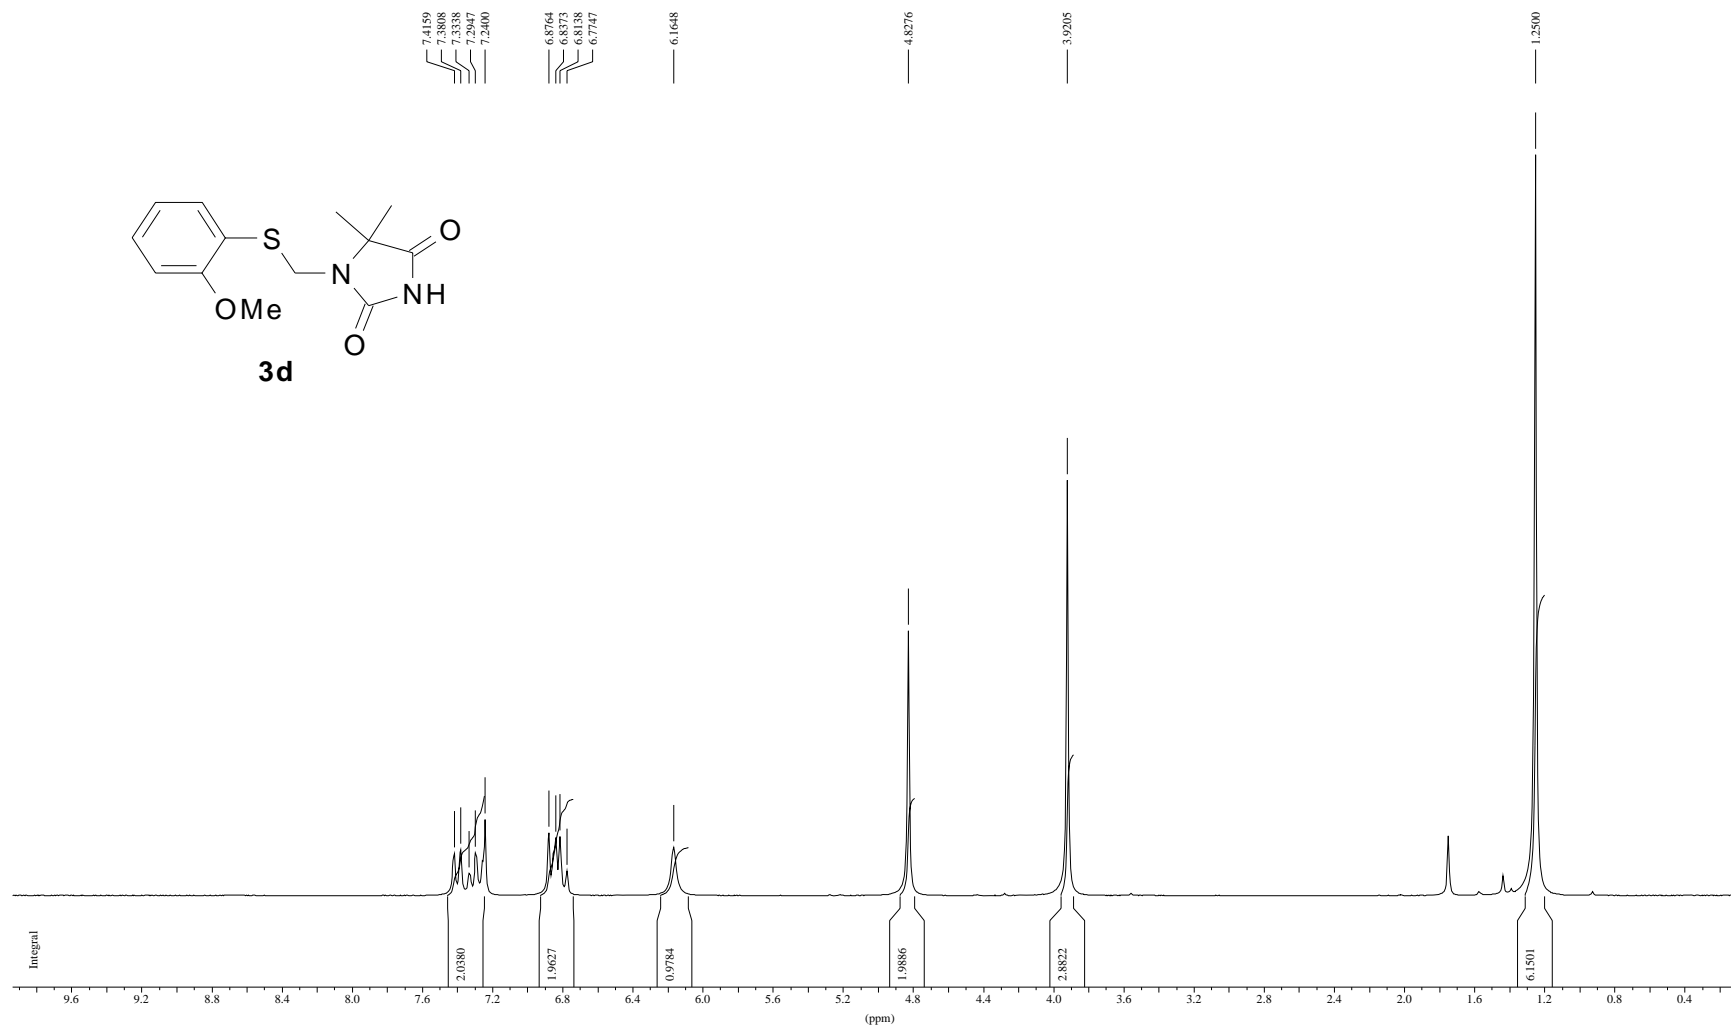

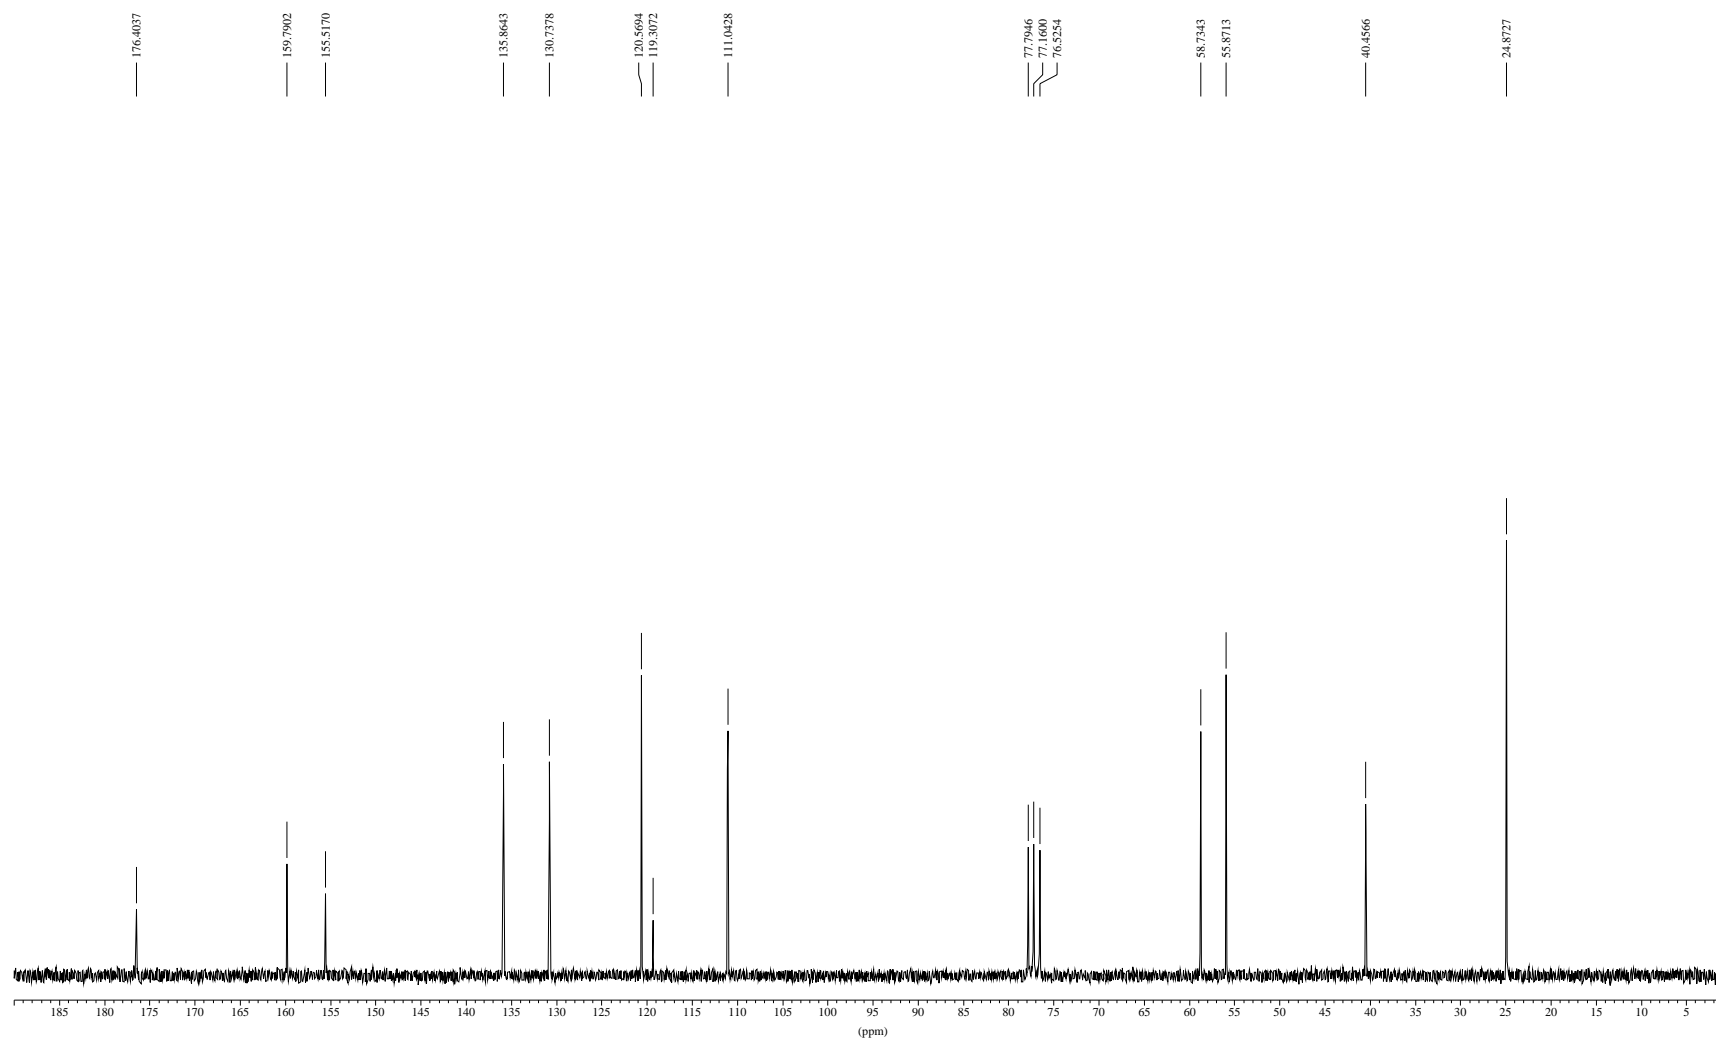

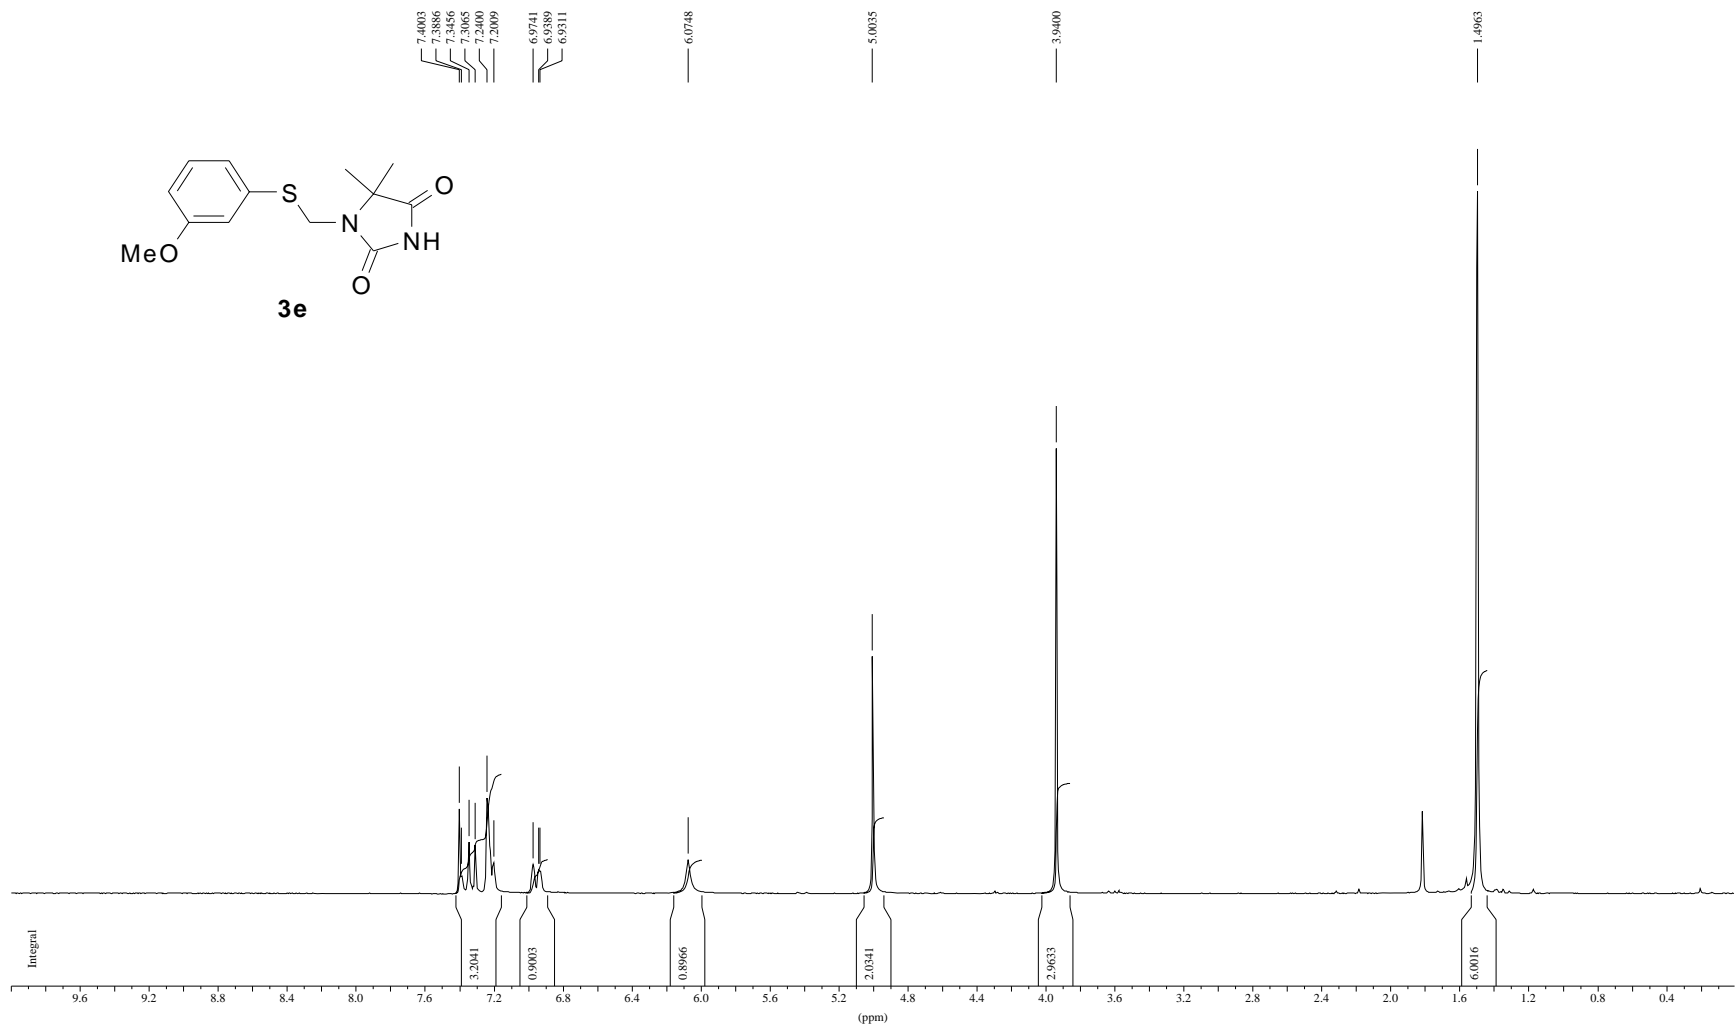

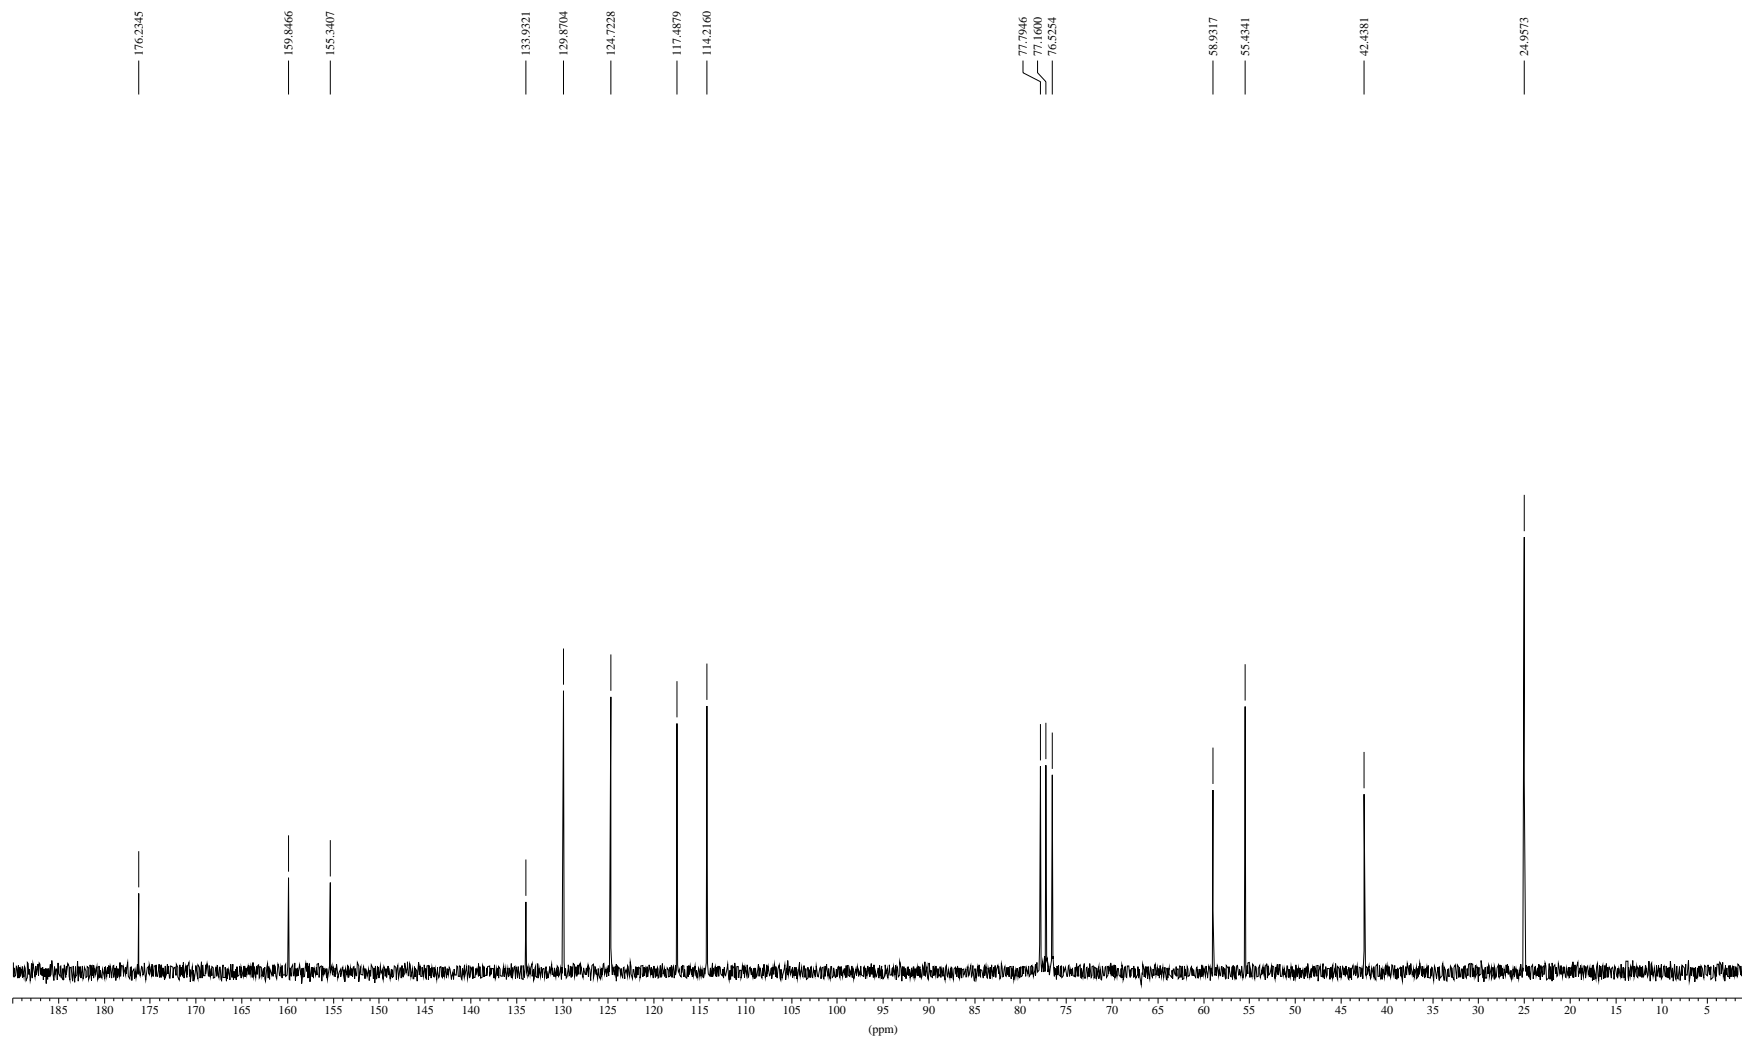

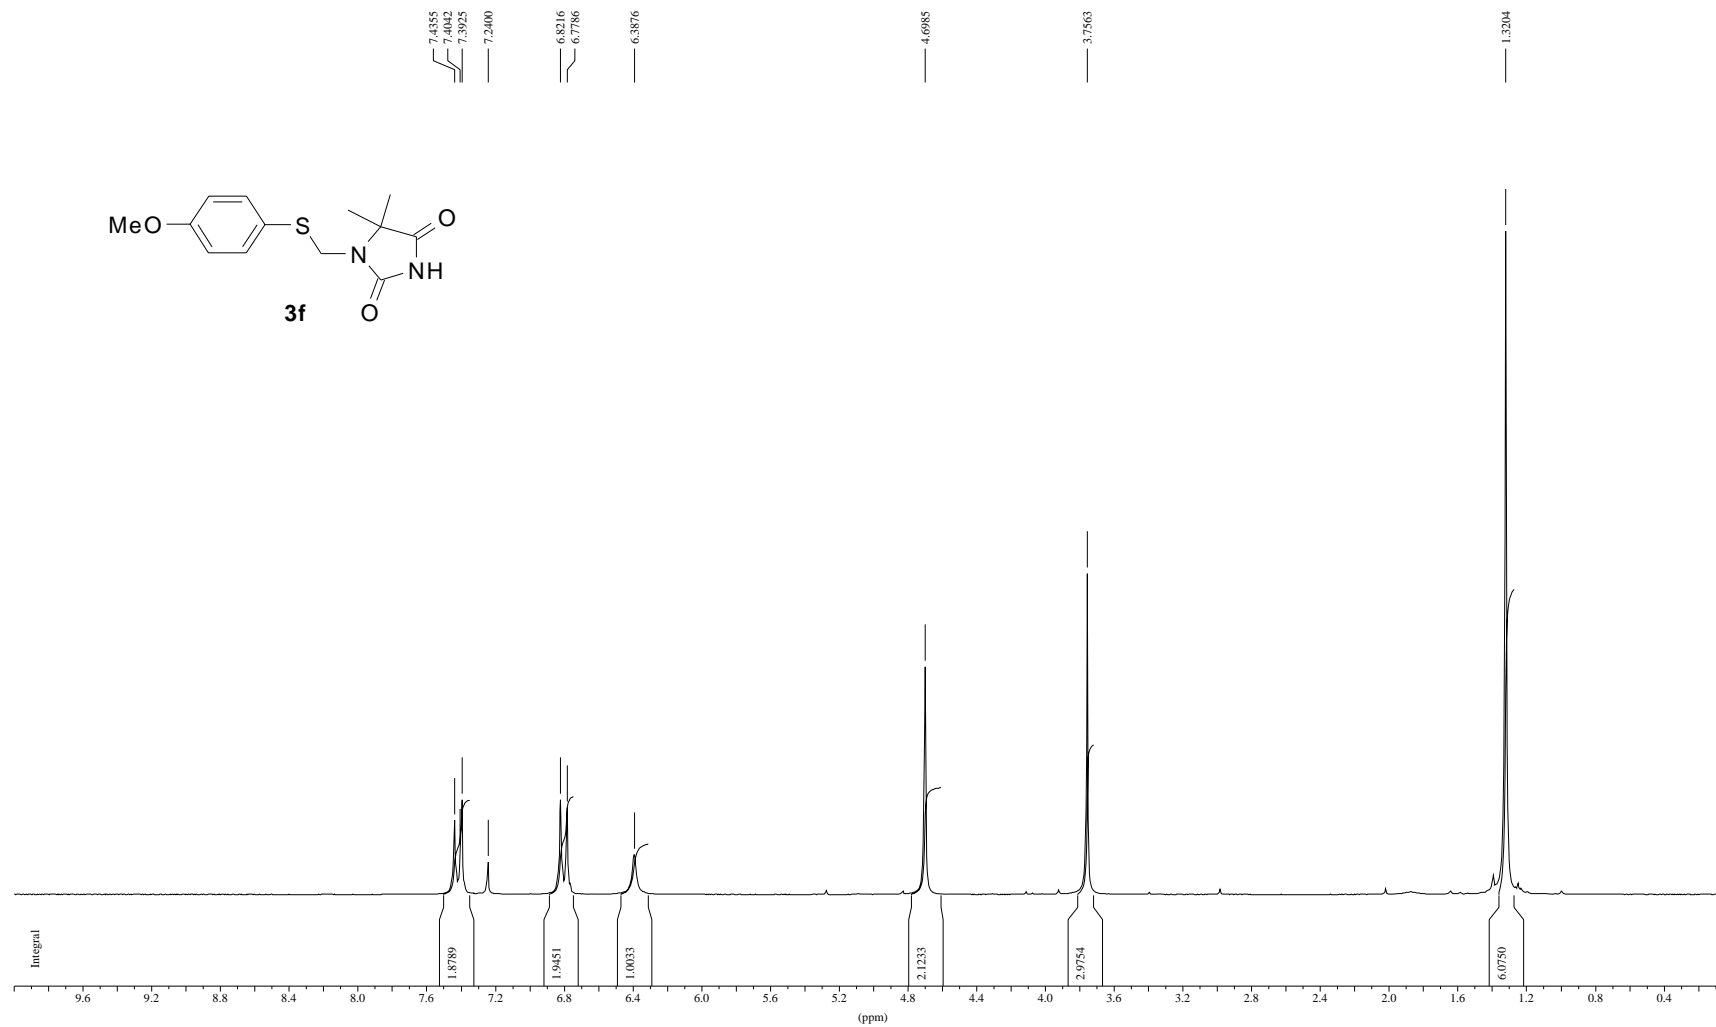

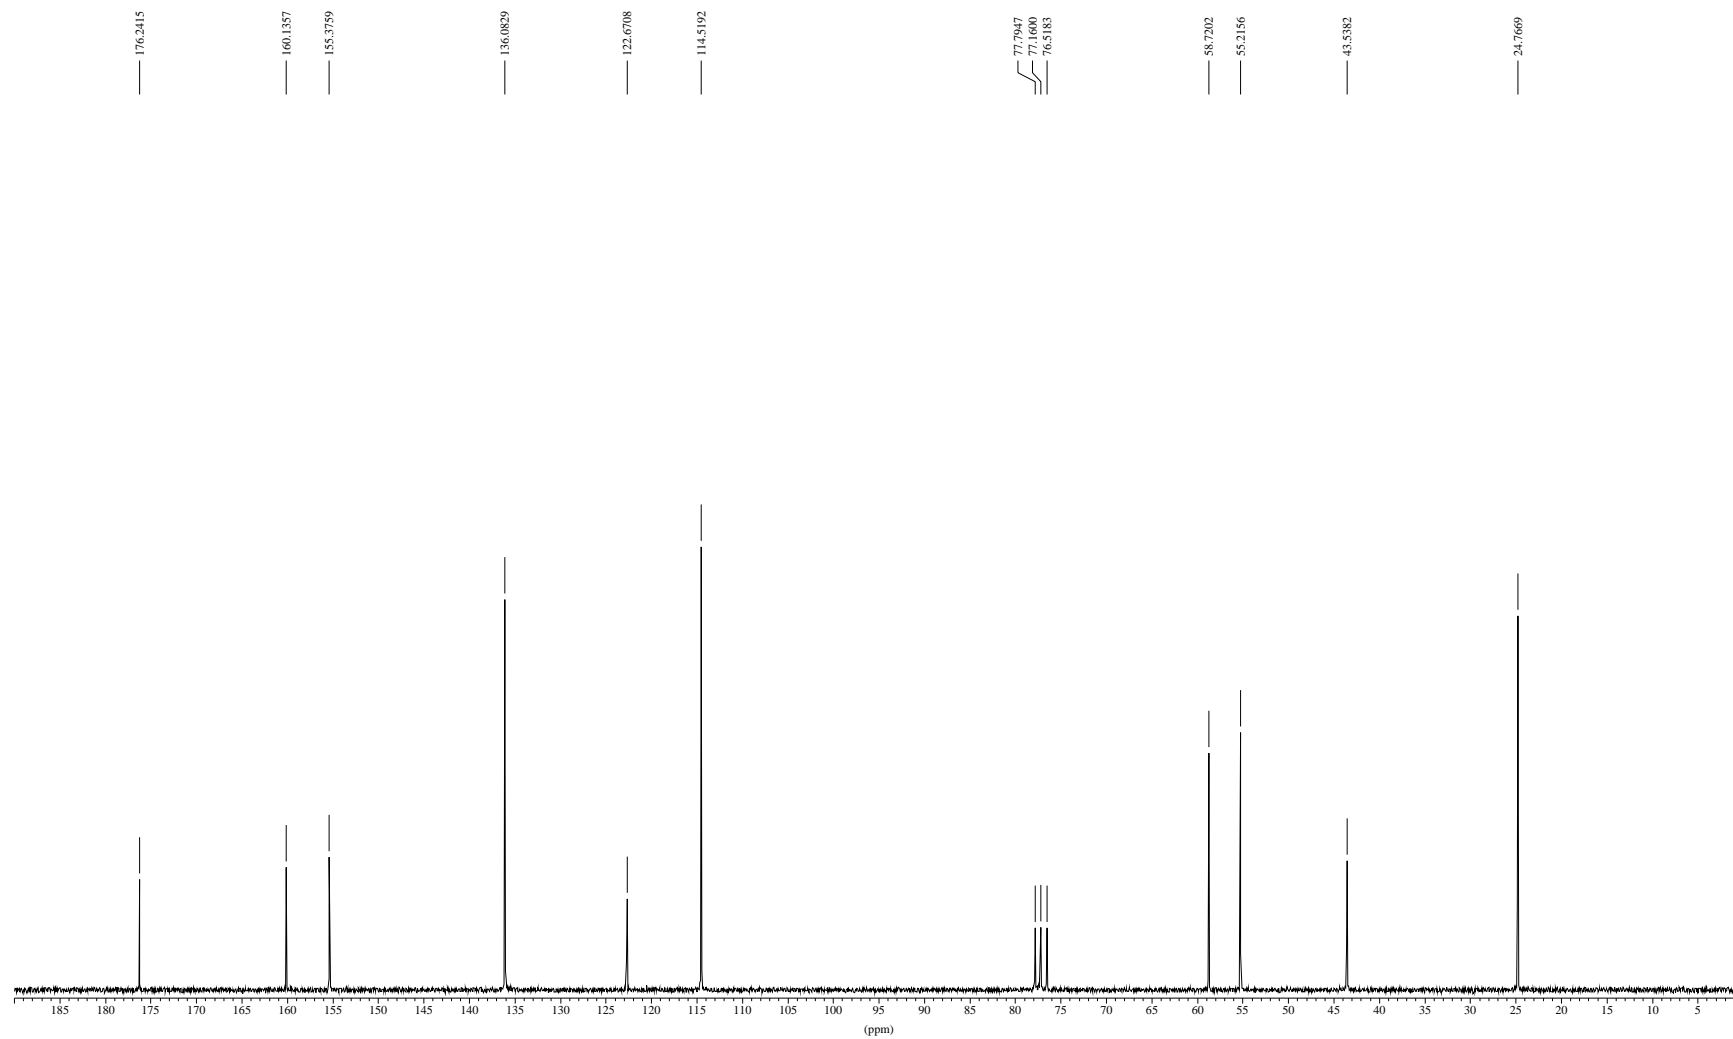



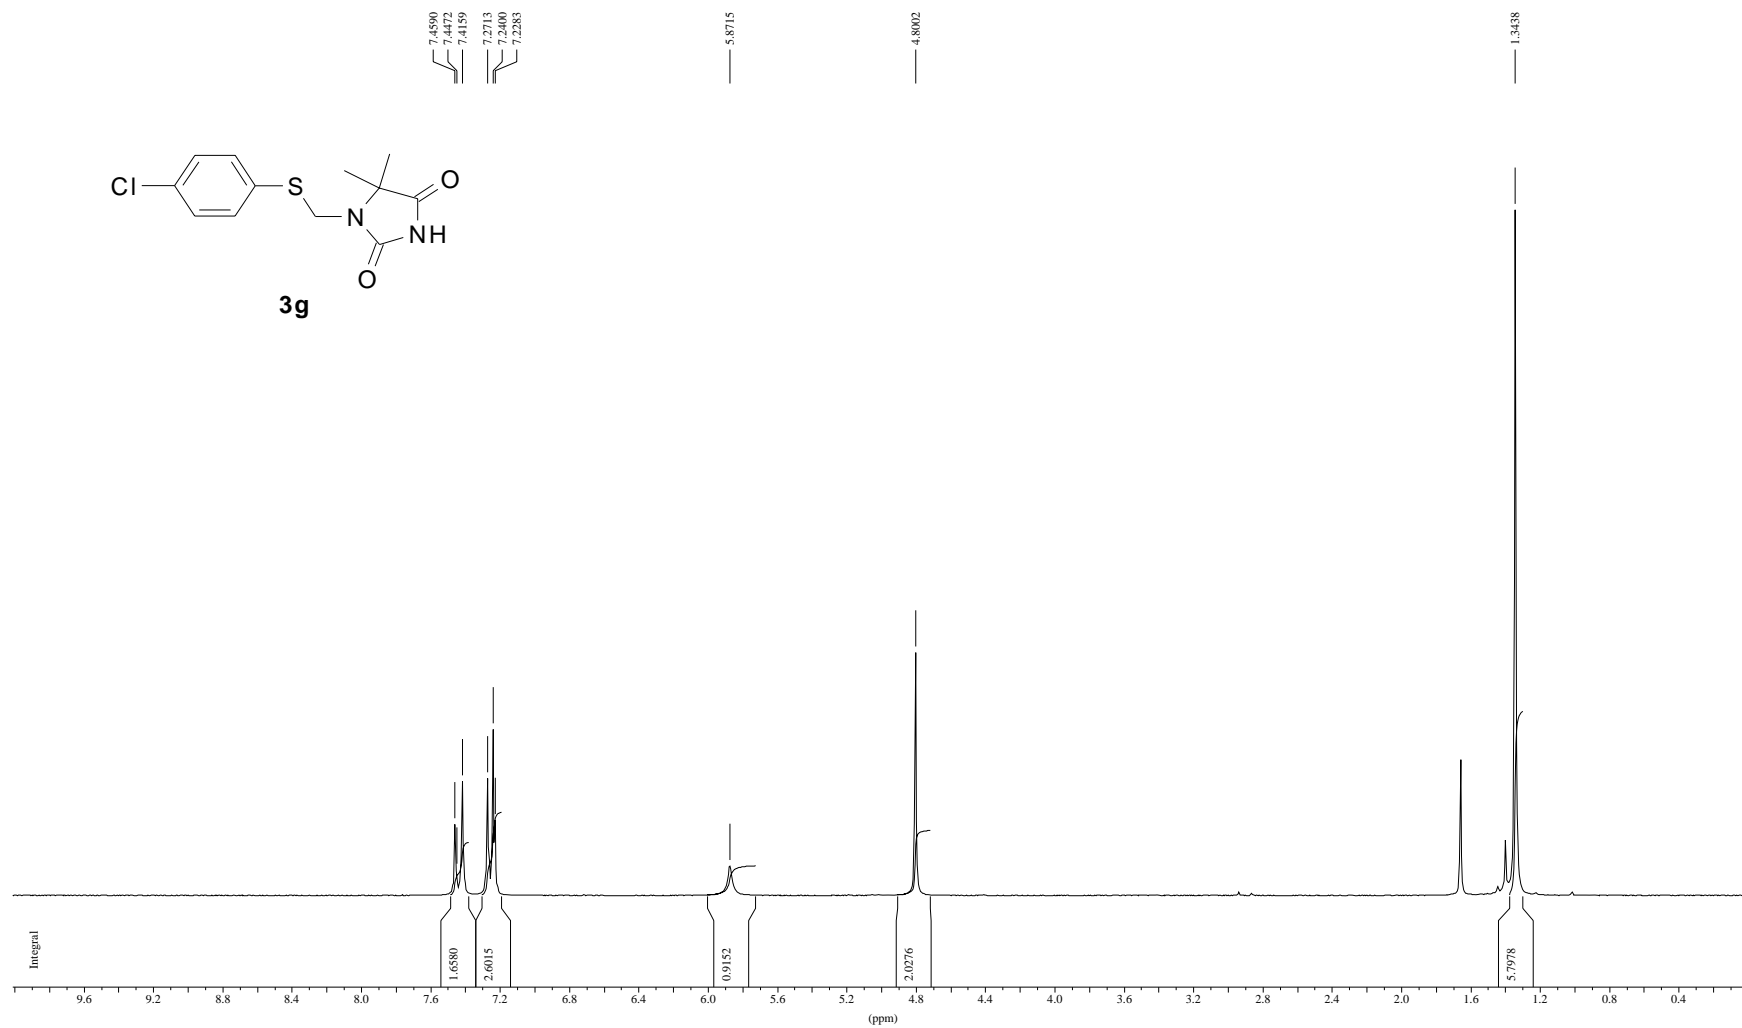

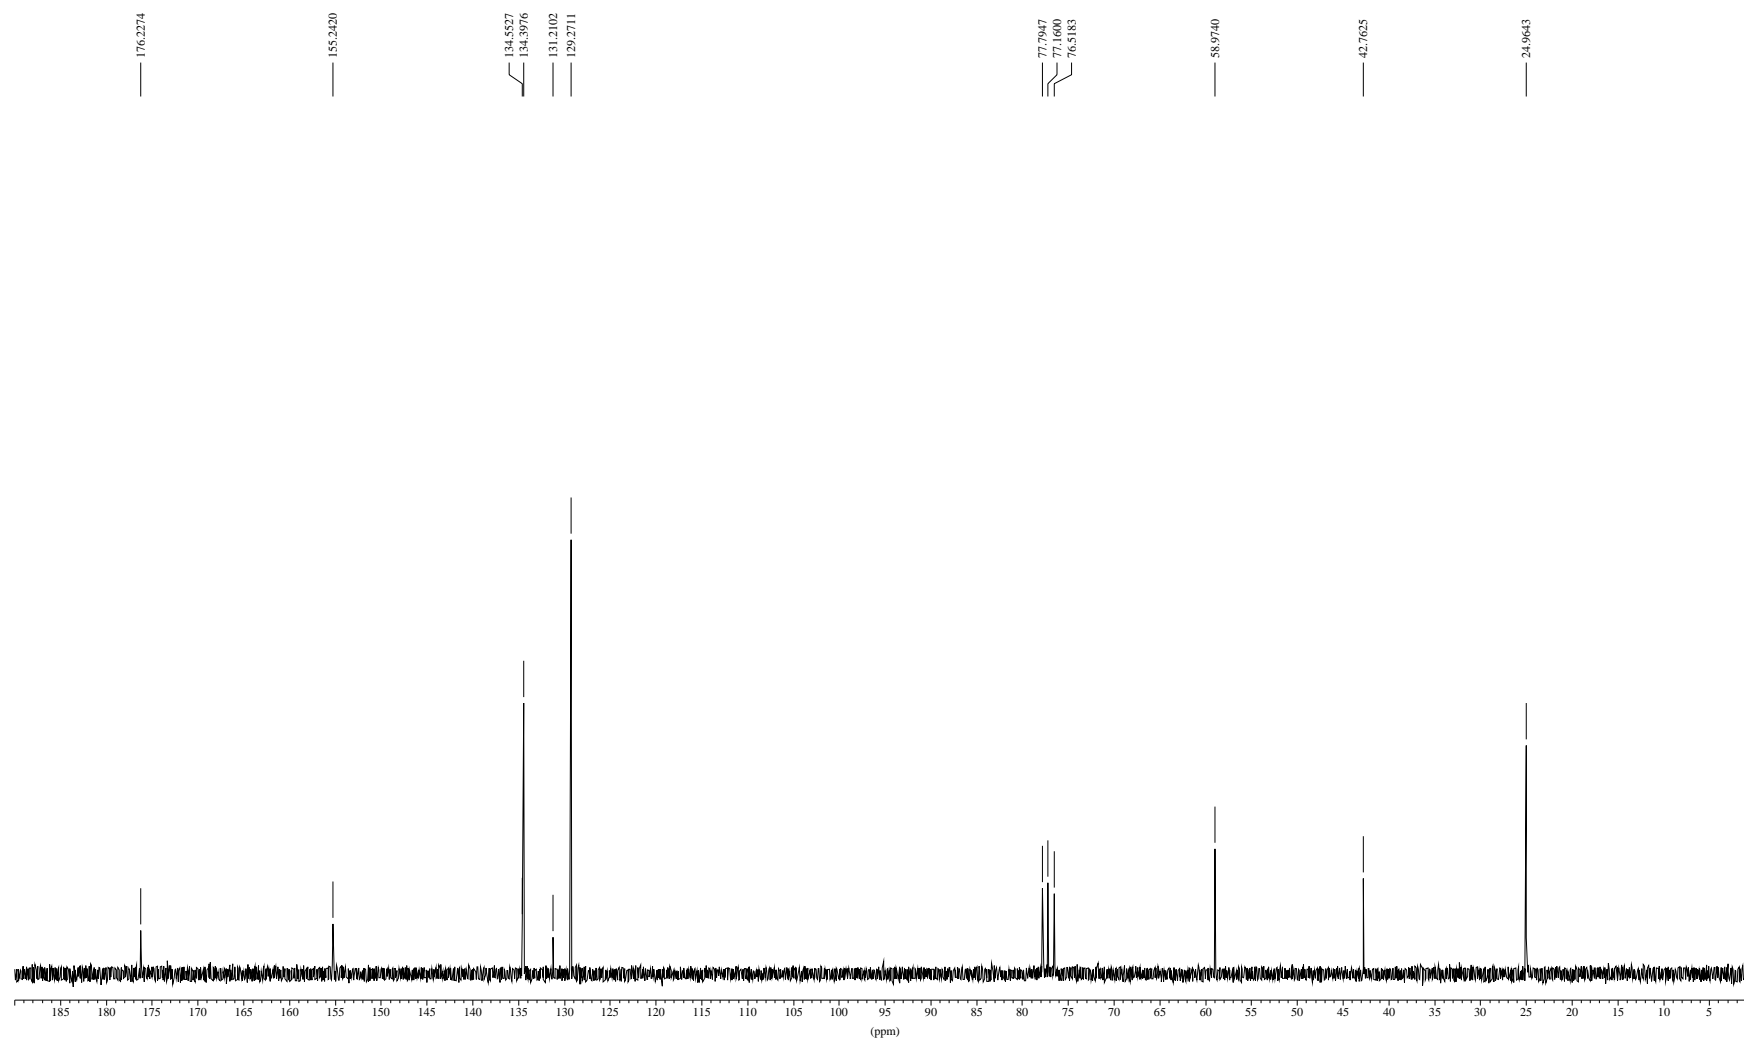

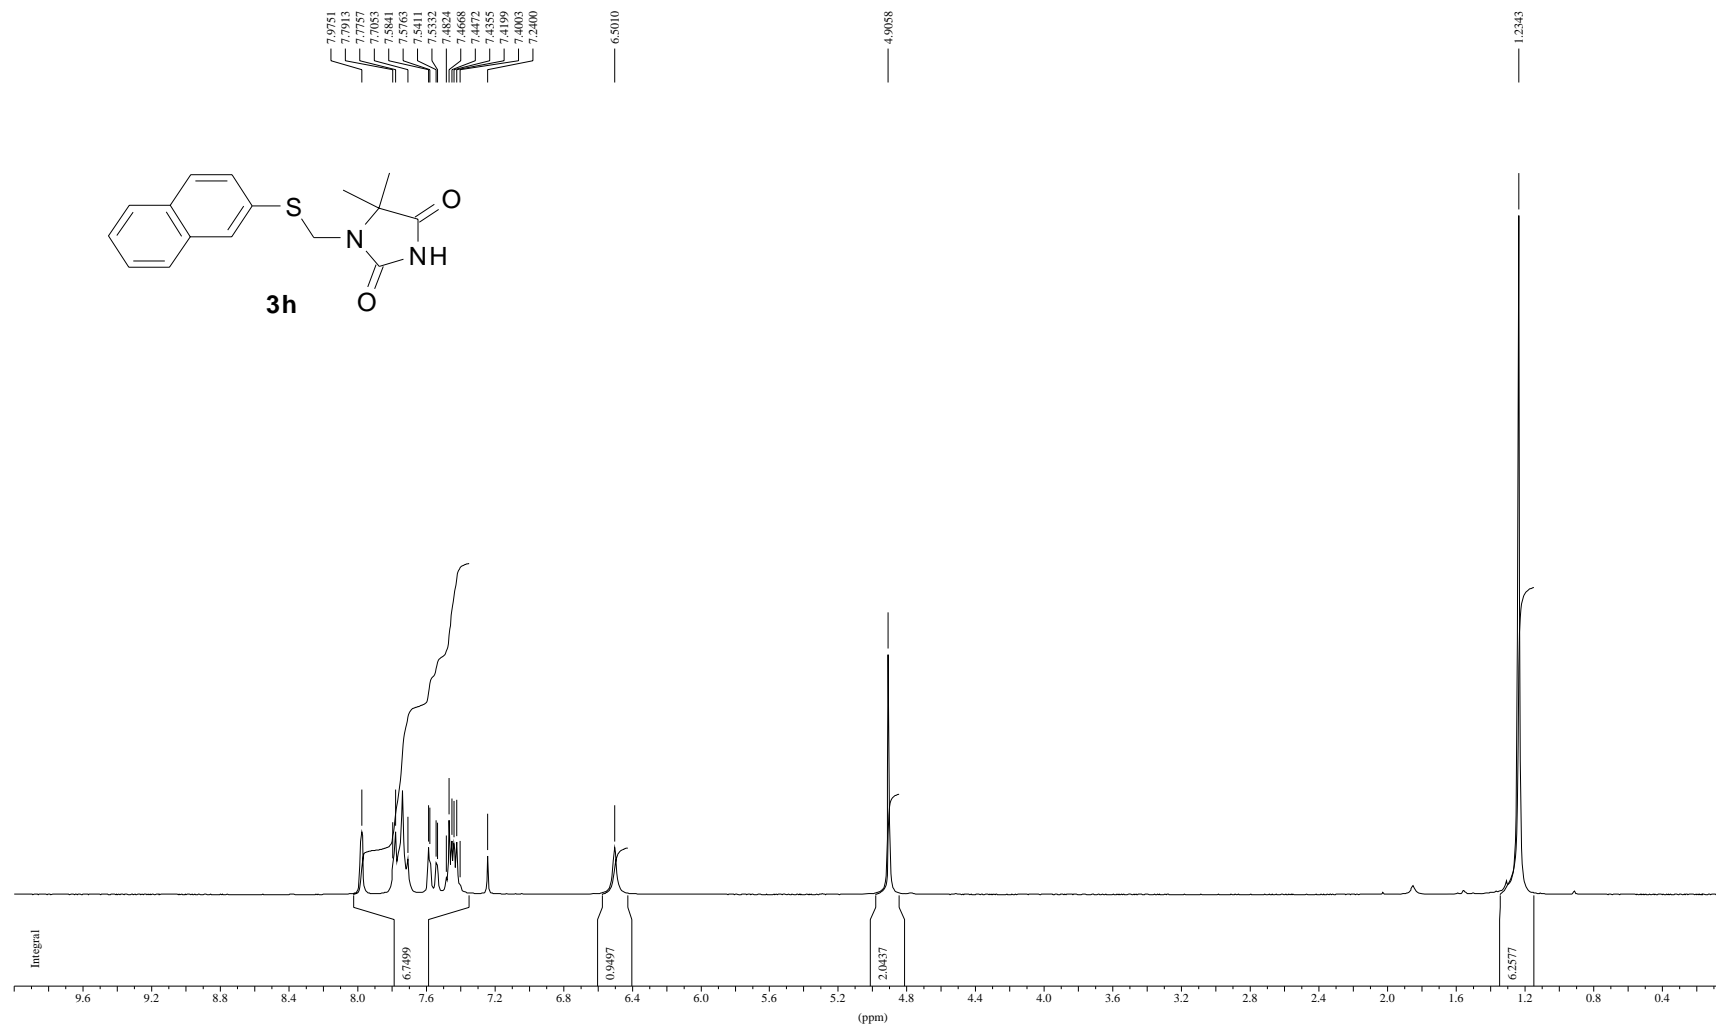

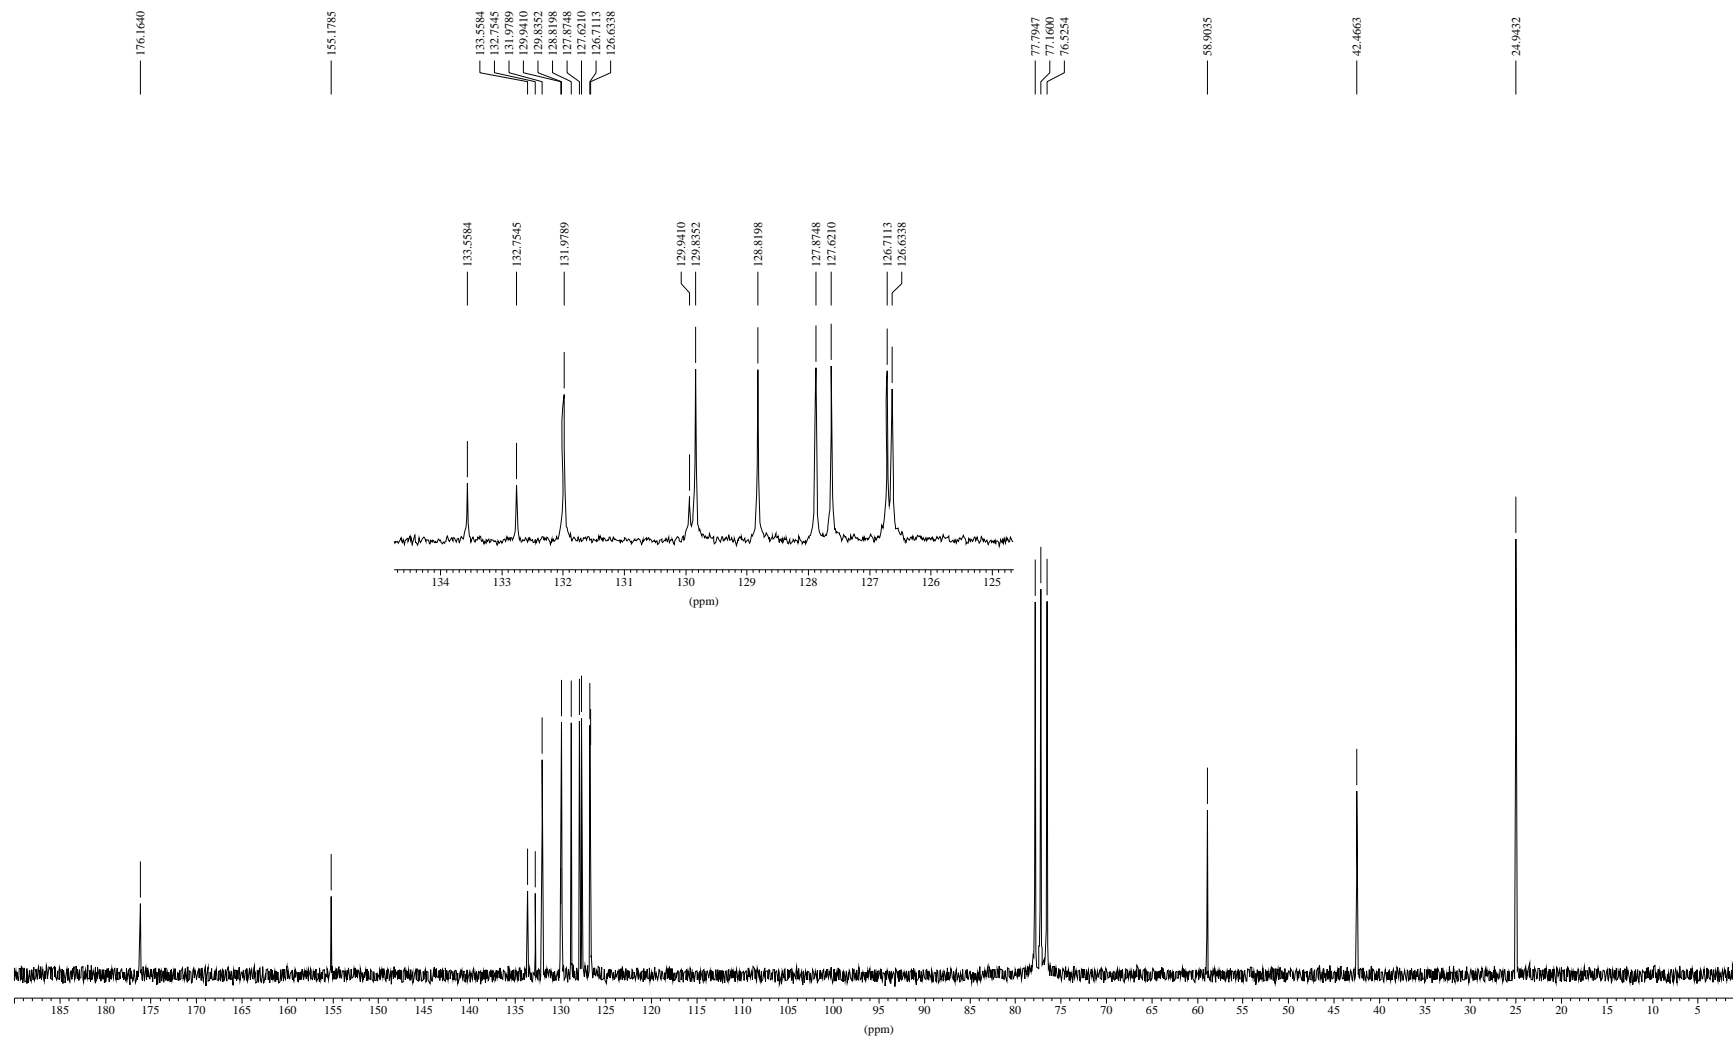

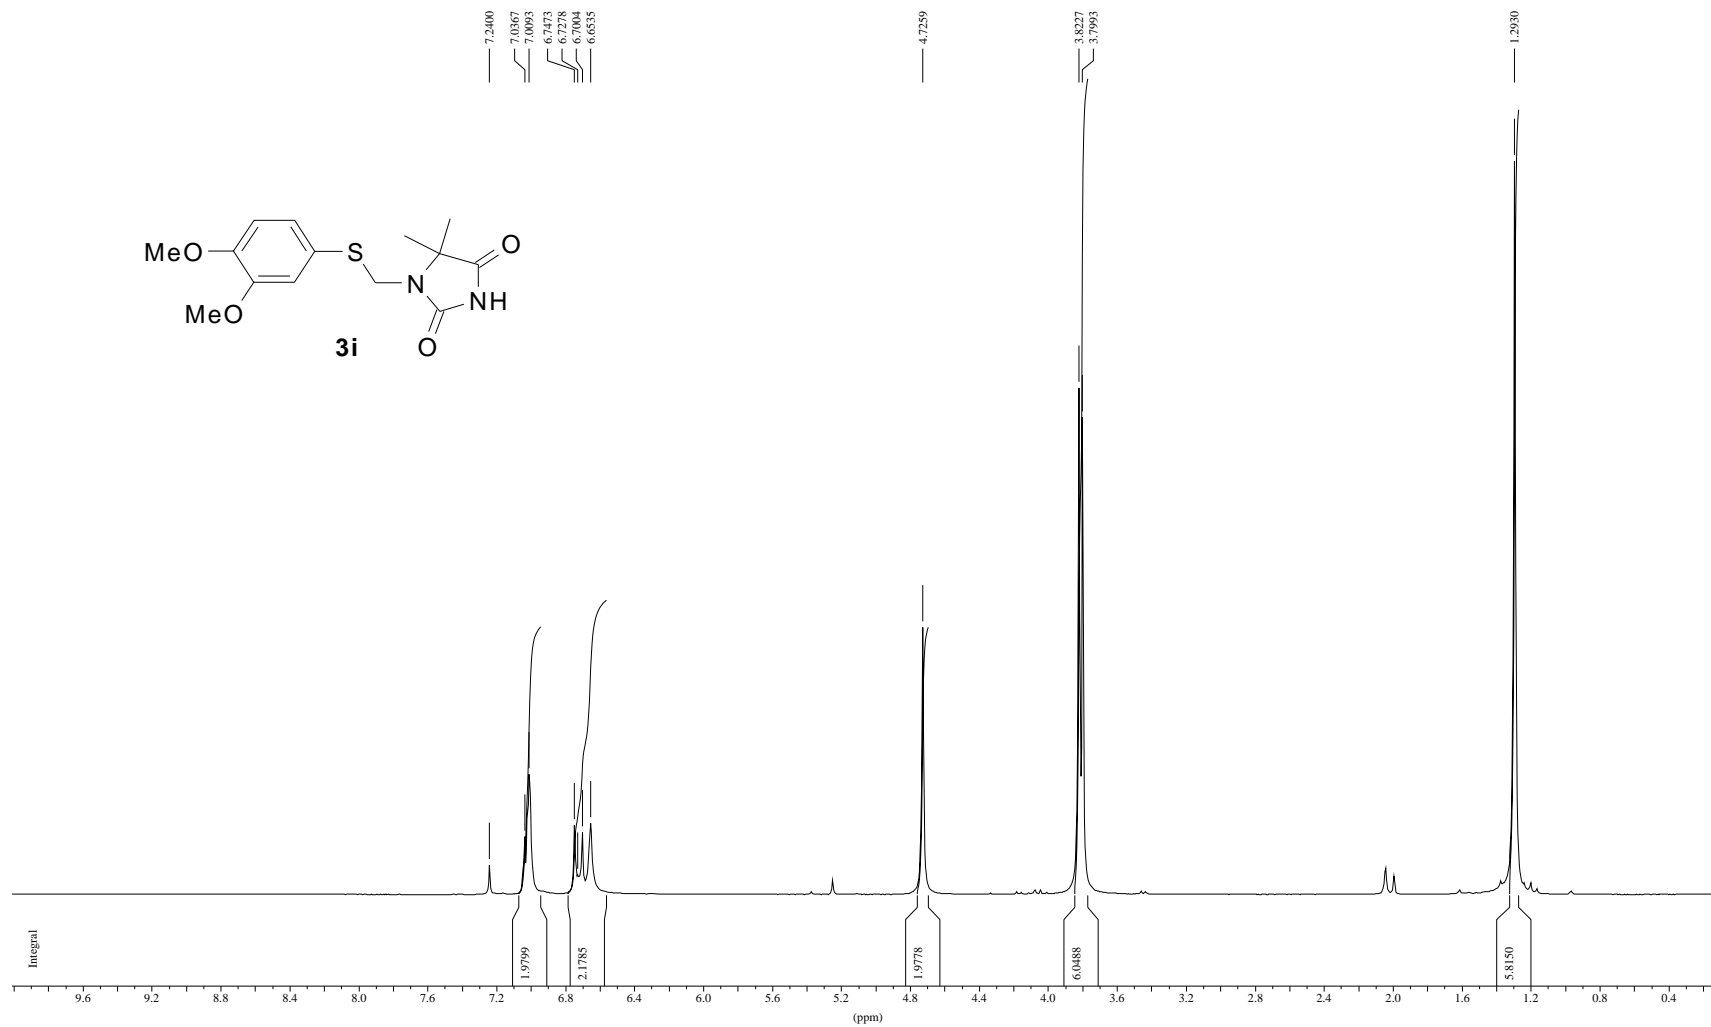

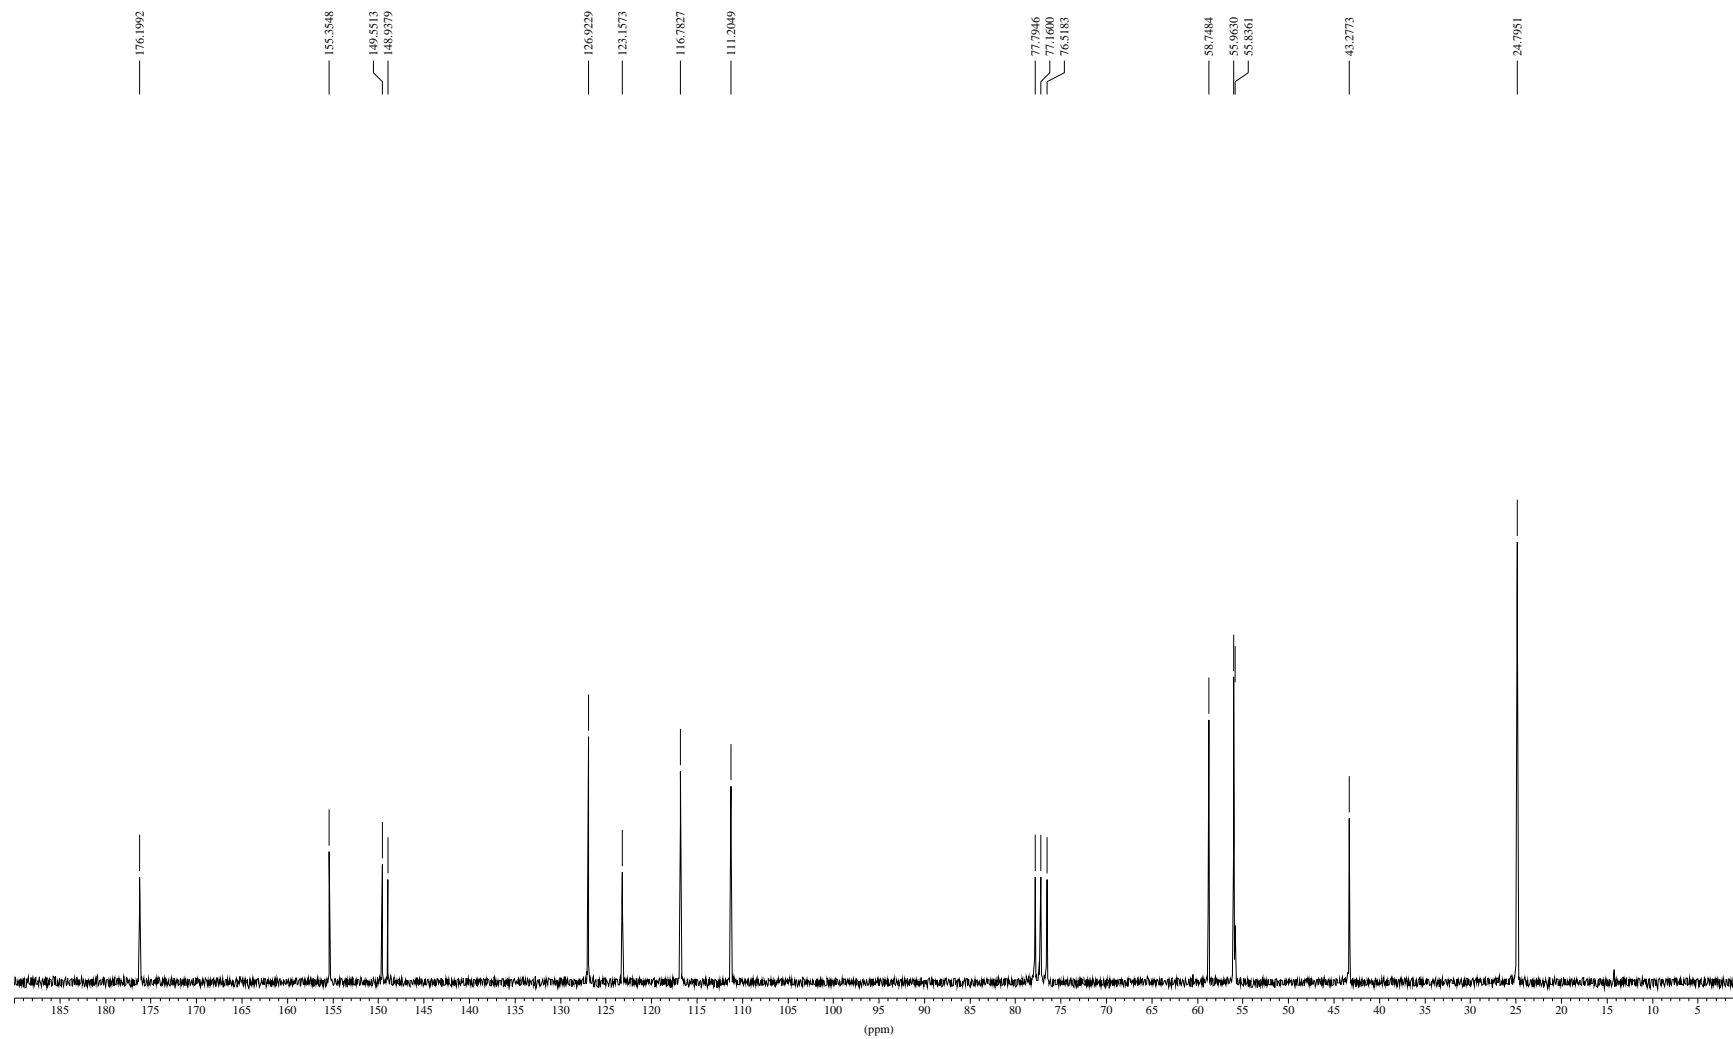

7.5 7.4 7.3 7.2  
2909948298796740  
3 8 1 4 6 1 4 0

4.8  
47  
1

1.8, 4  
3592  
4 4

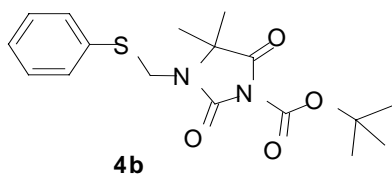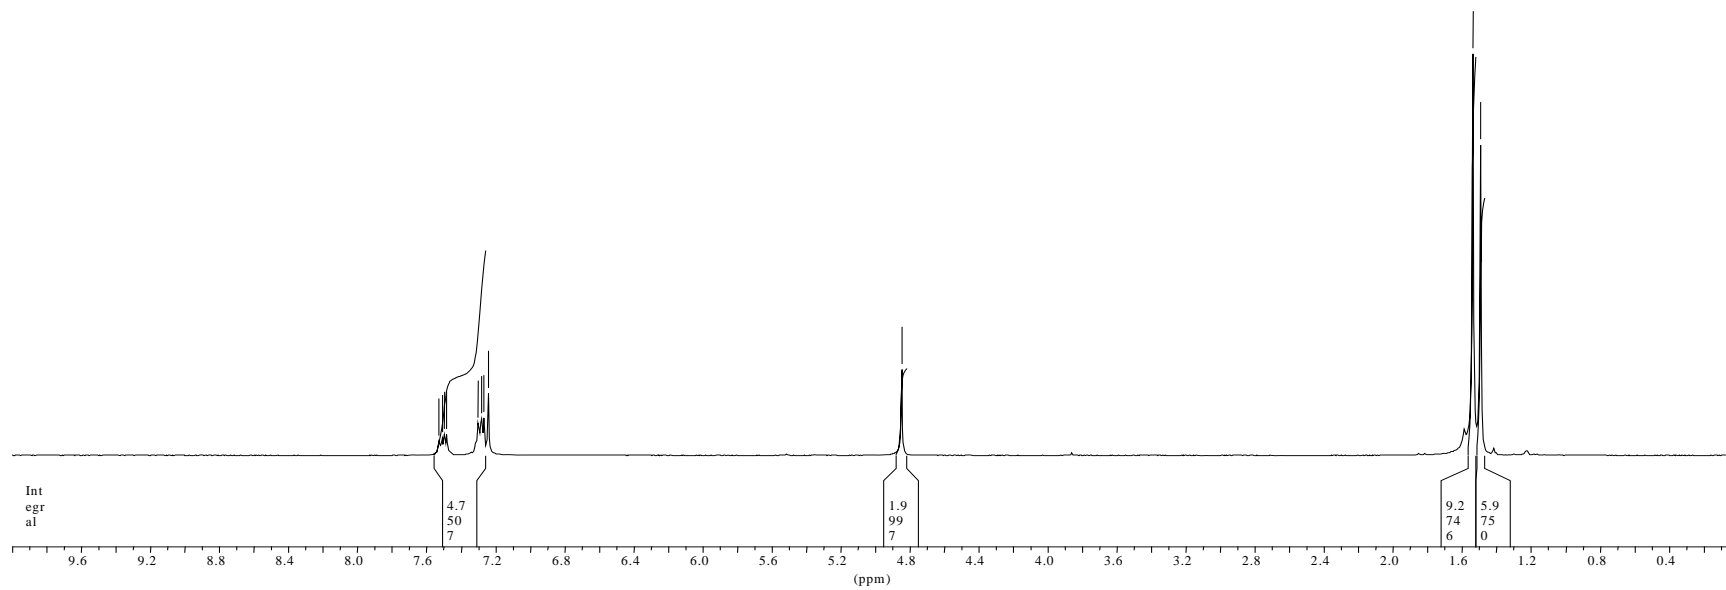

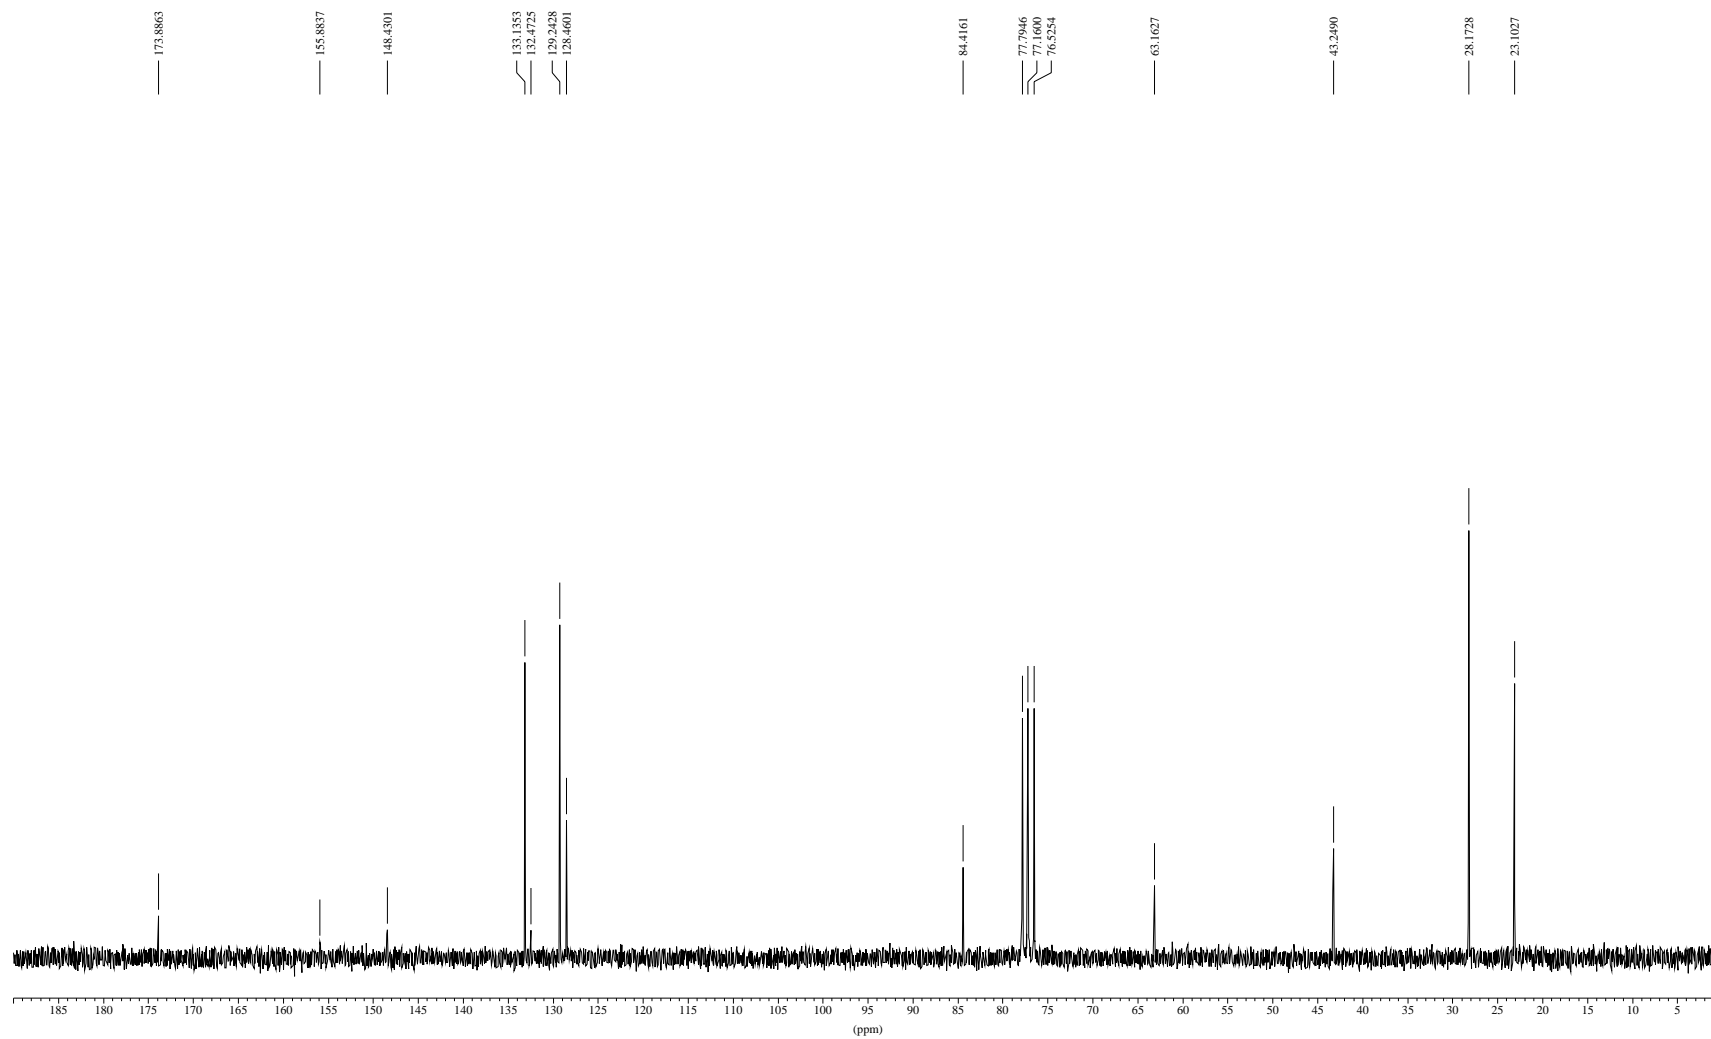



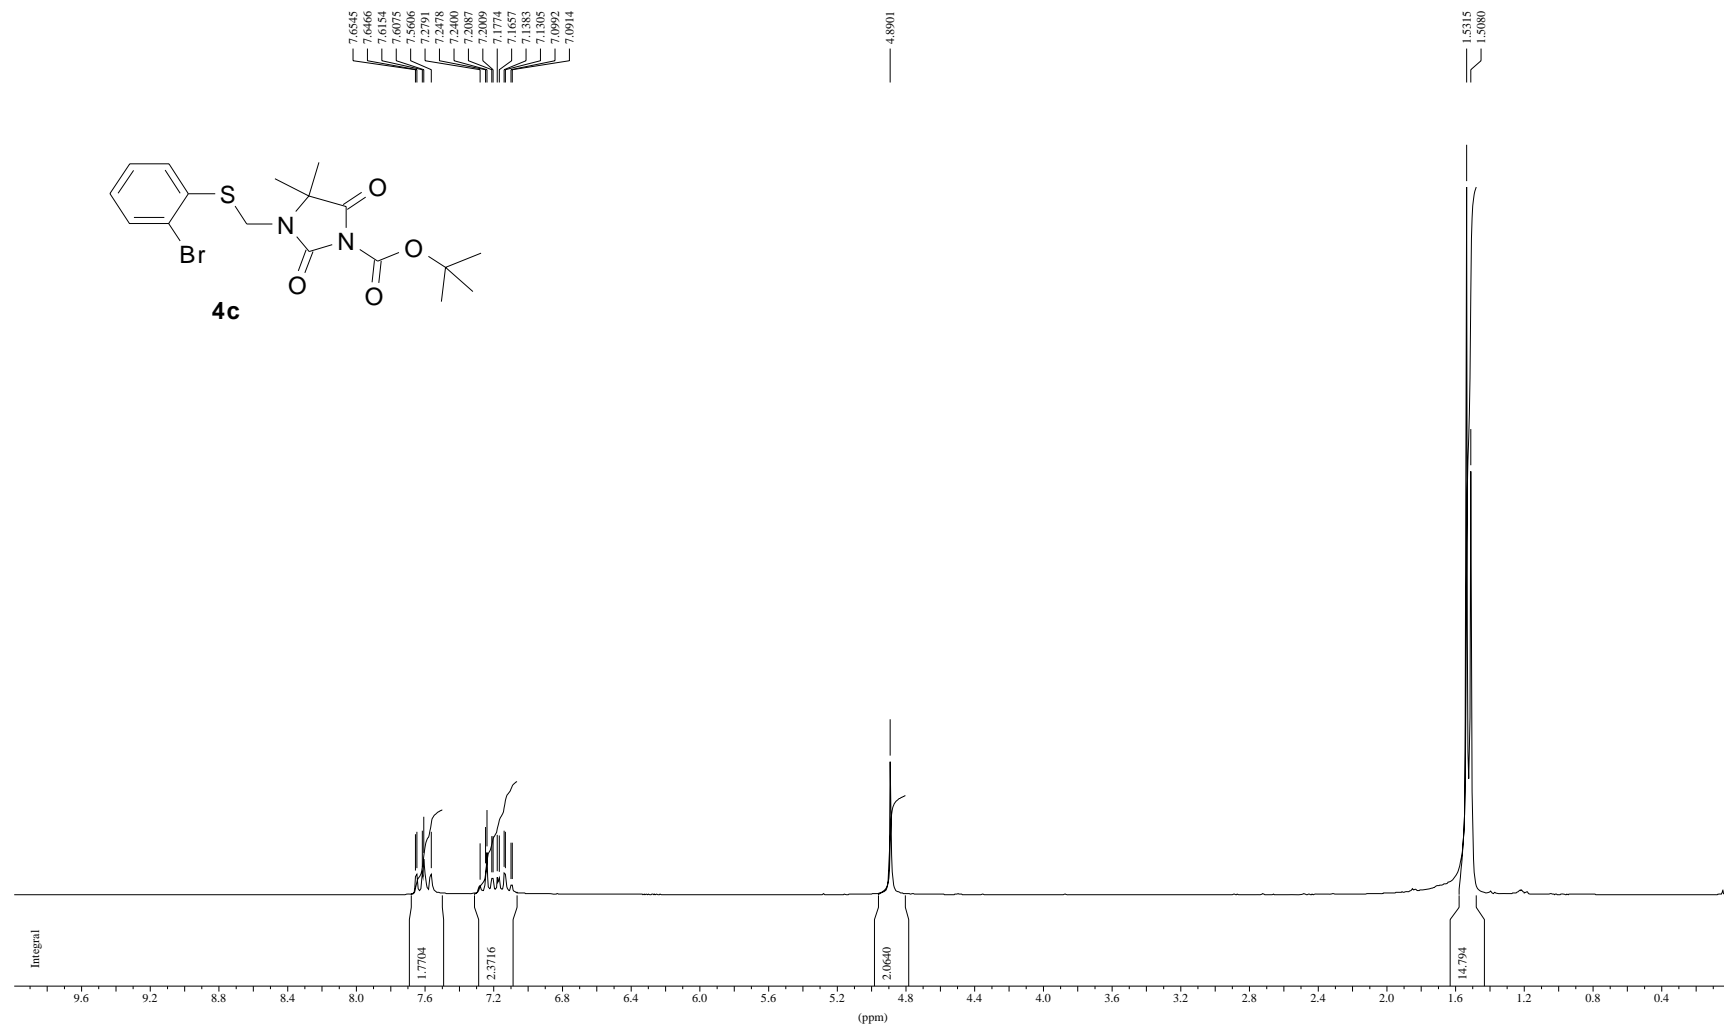

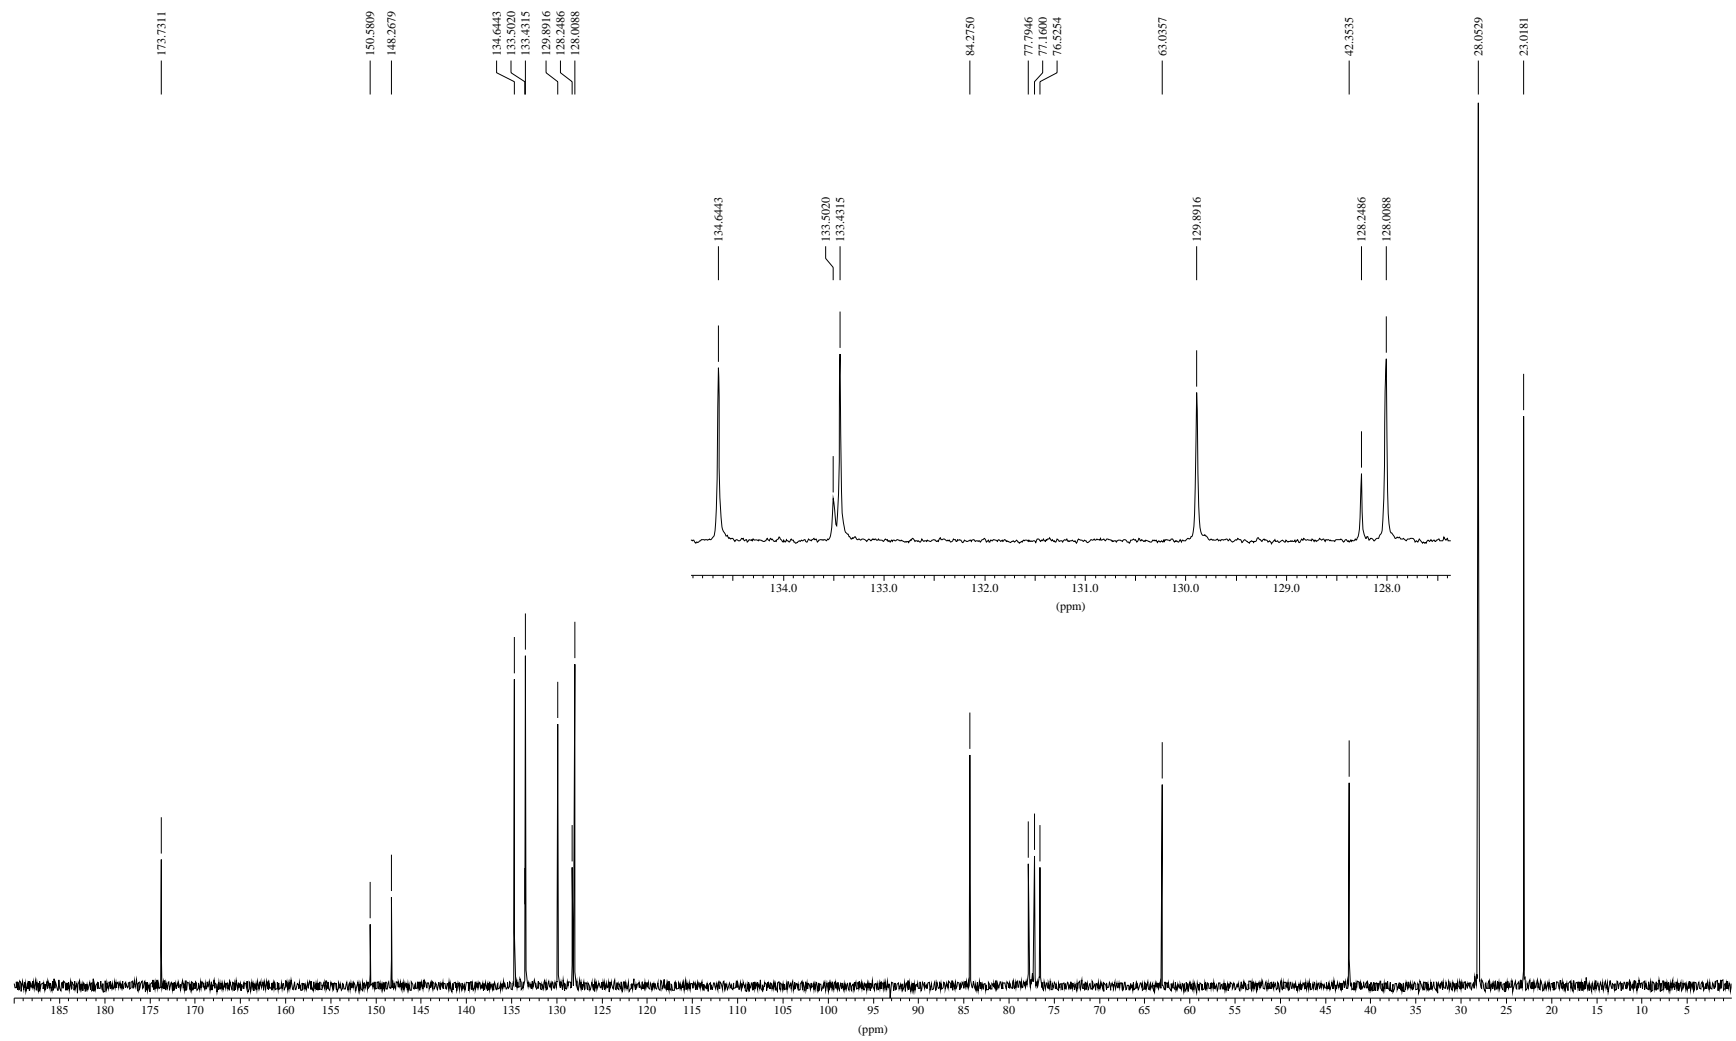

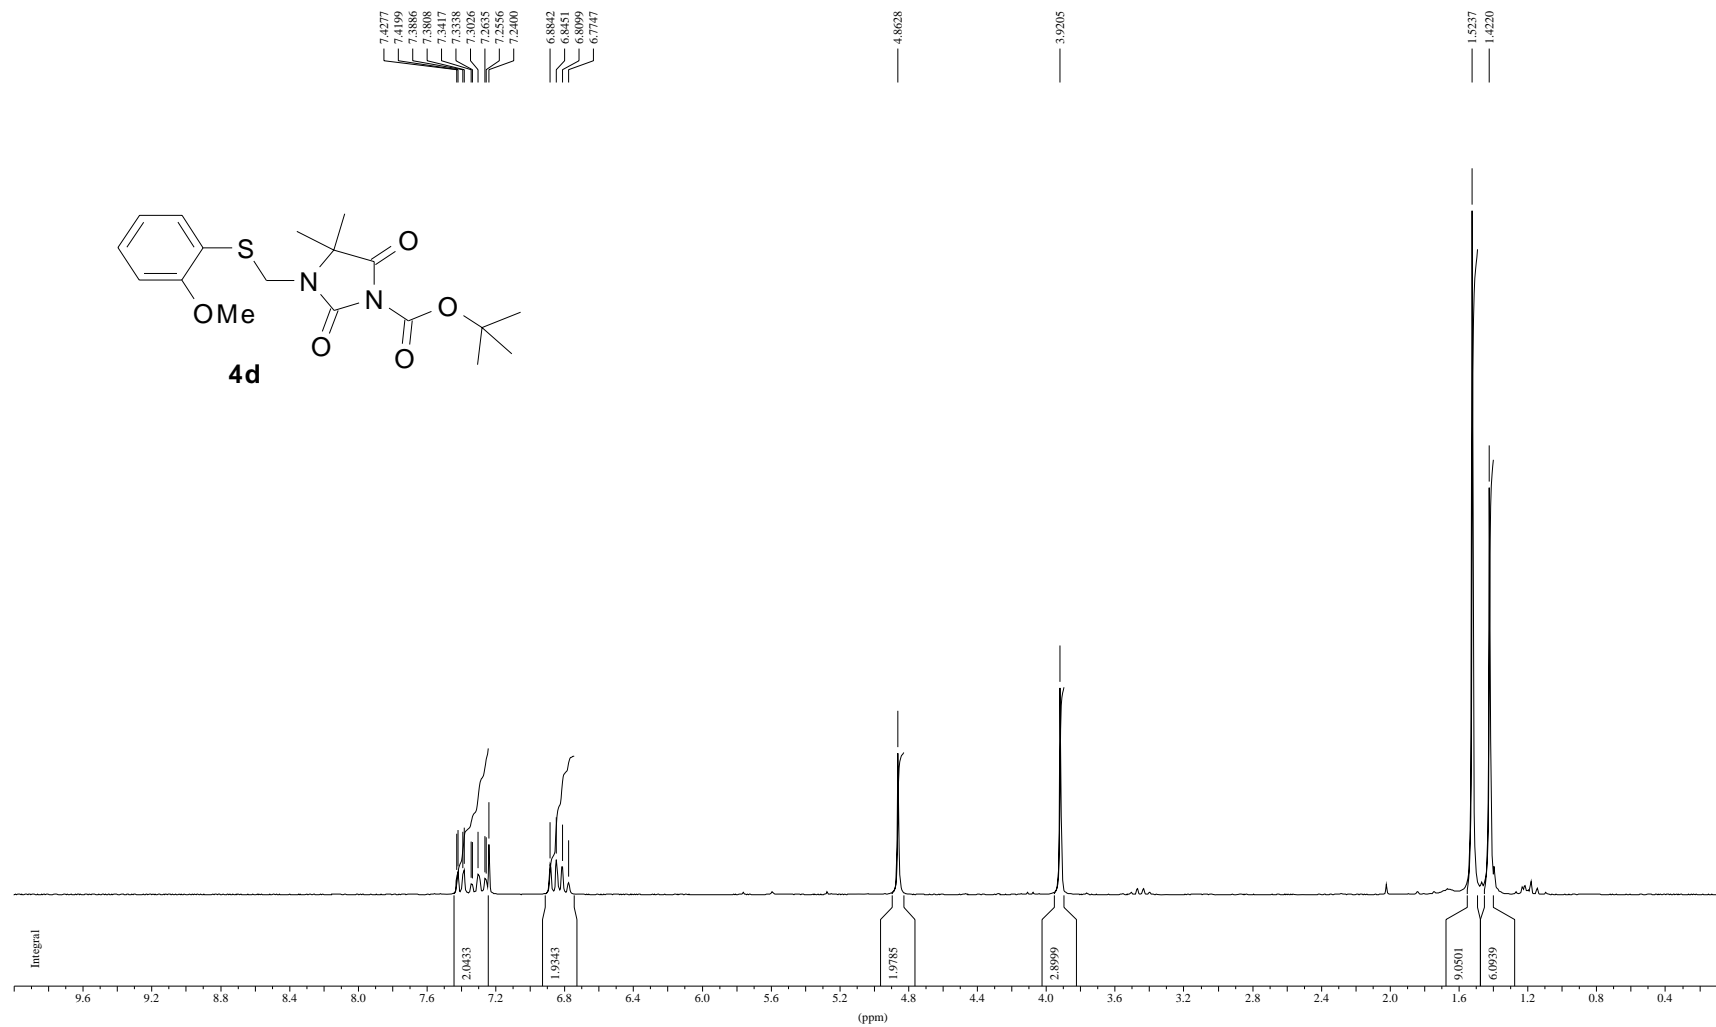

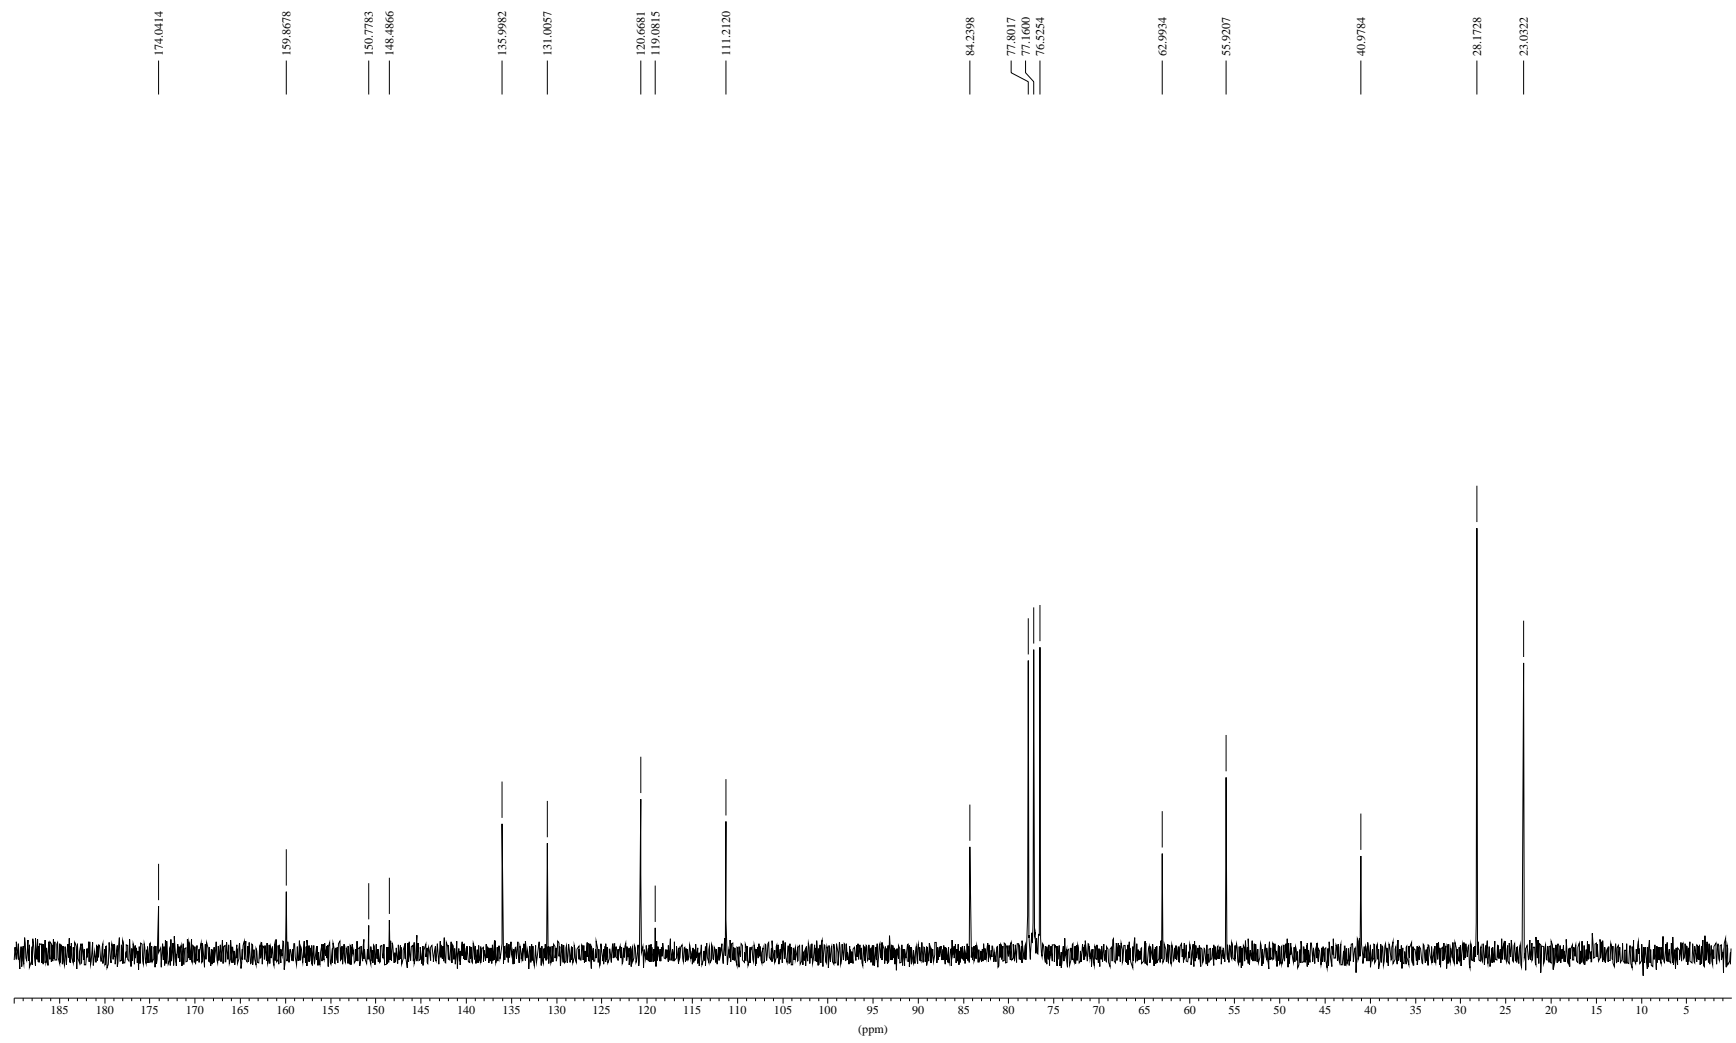

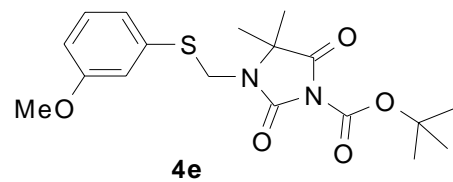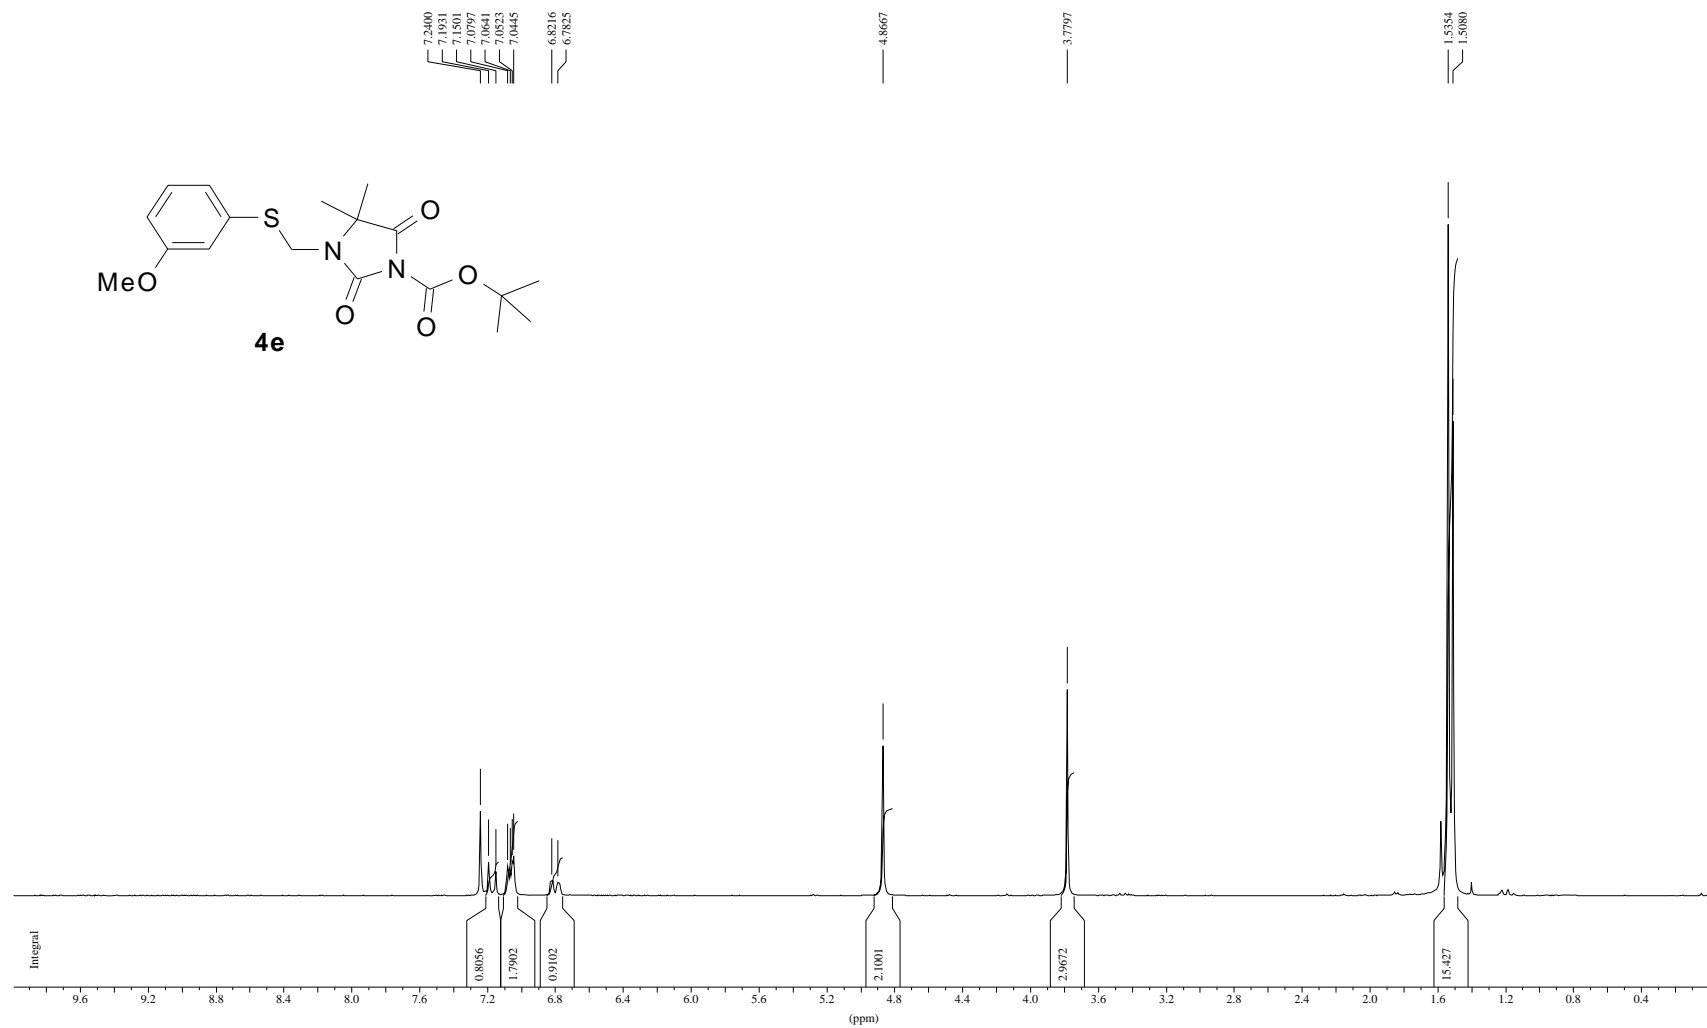

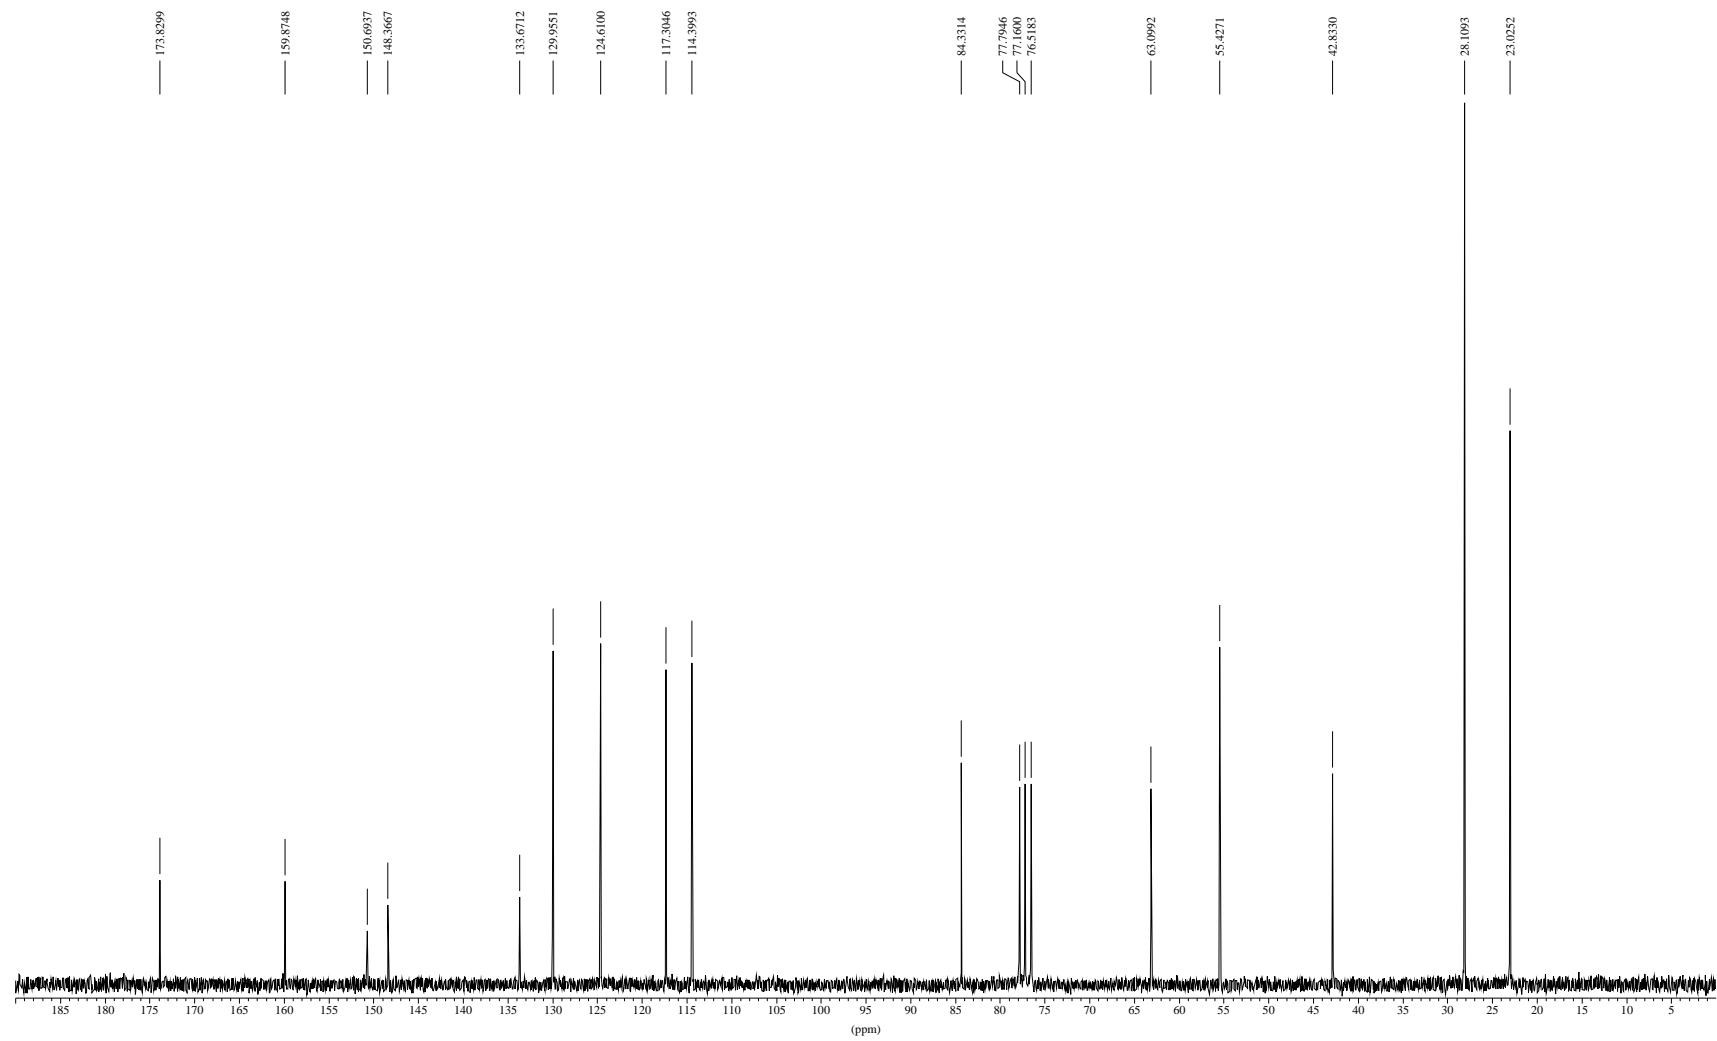

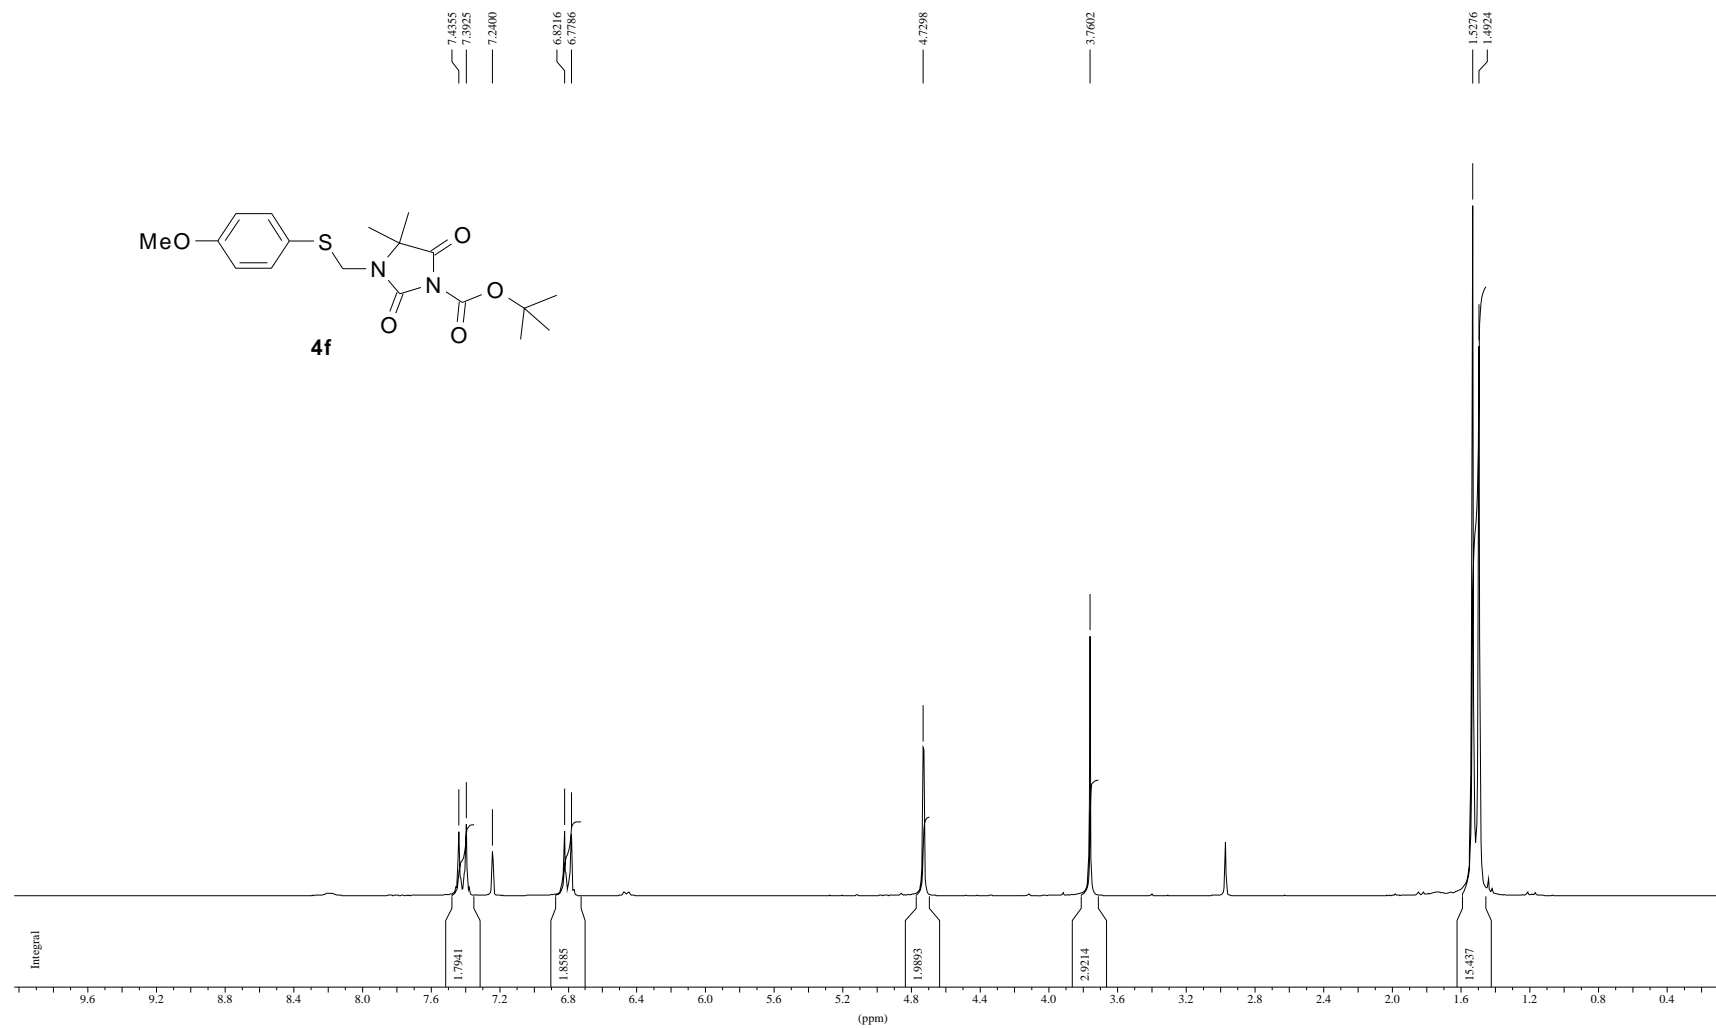

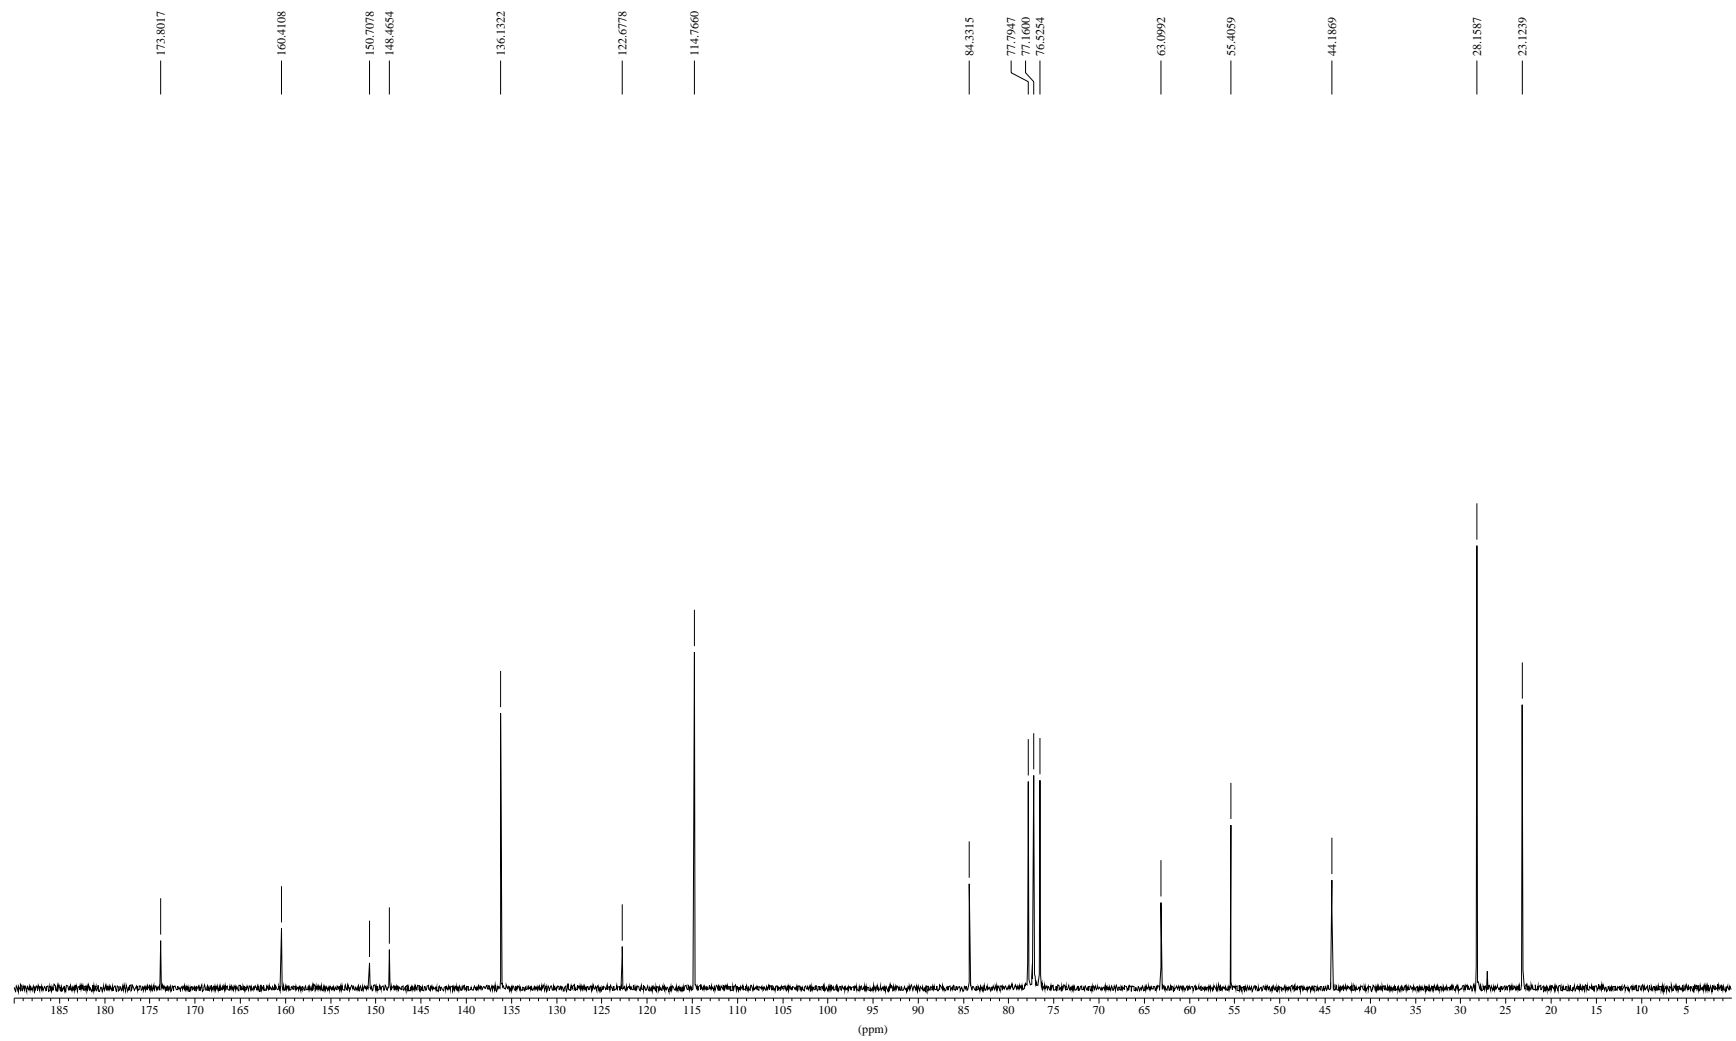



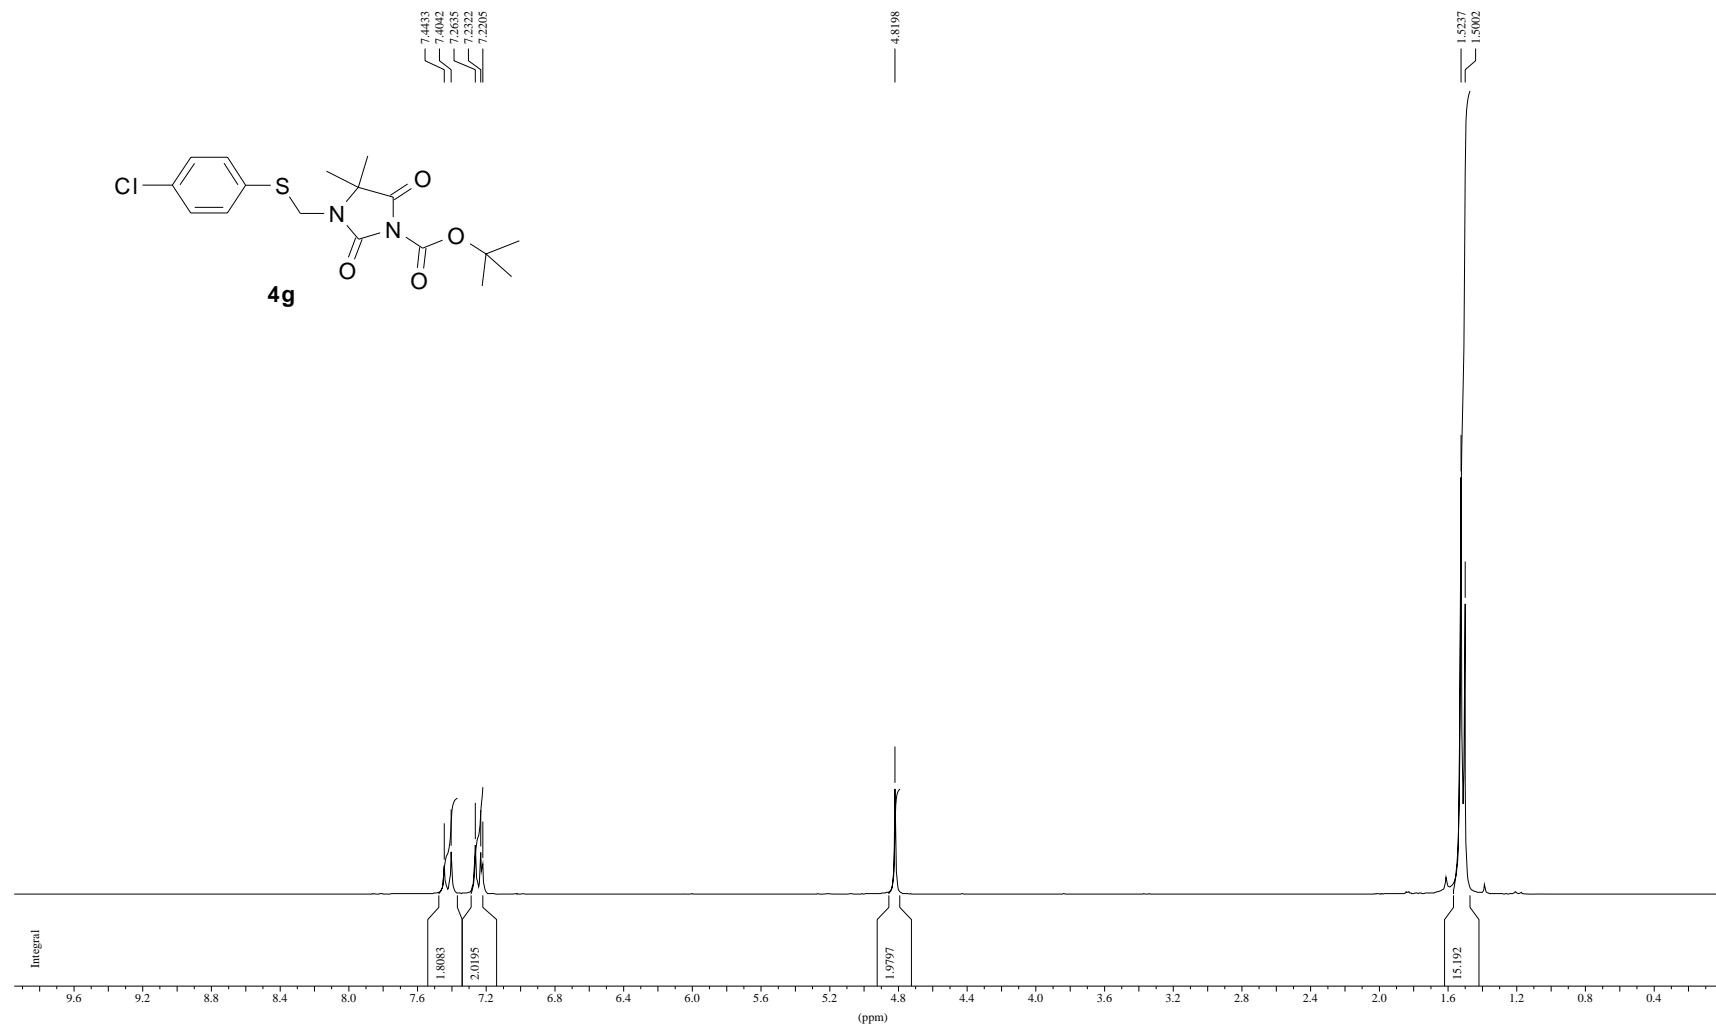

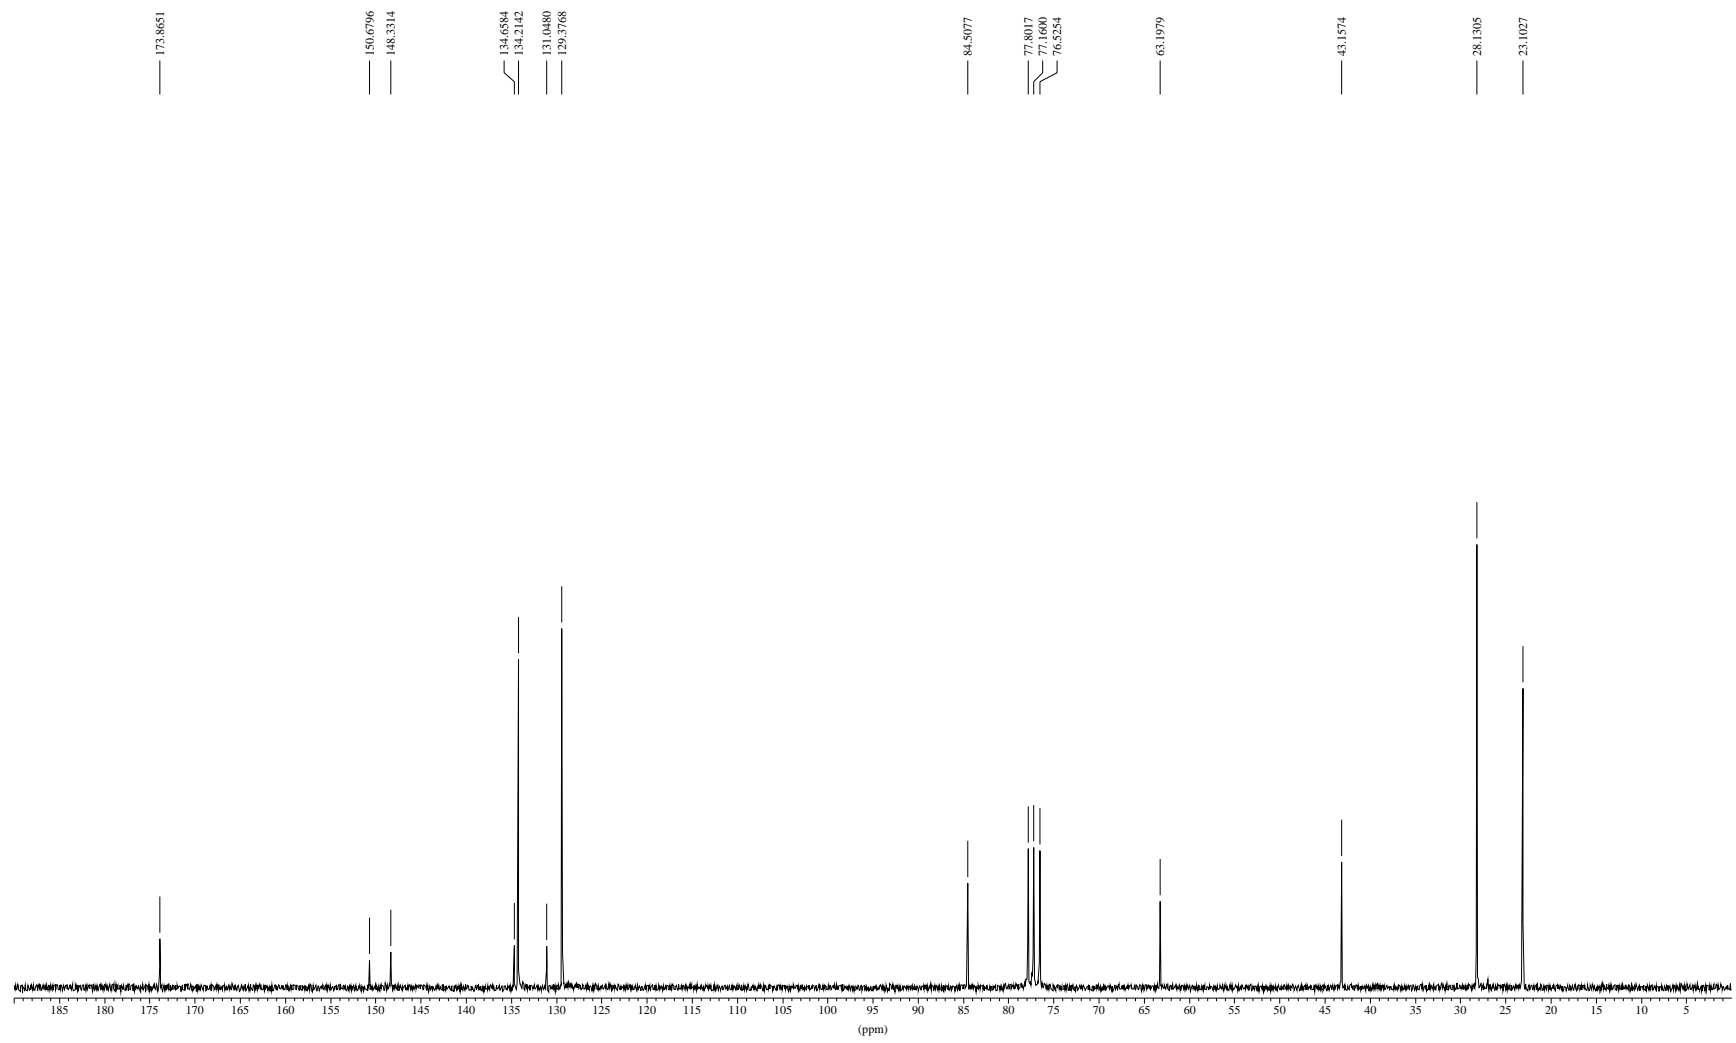

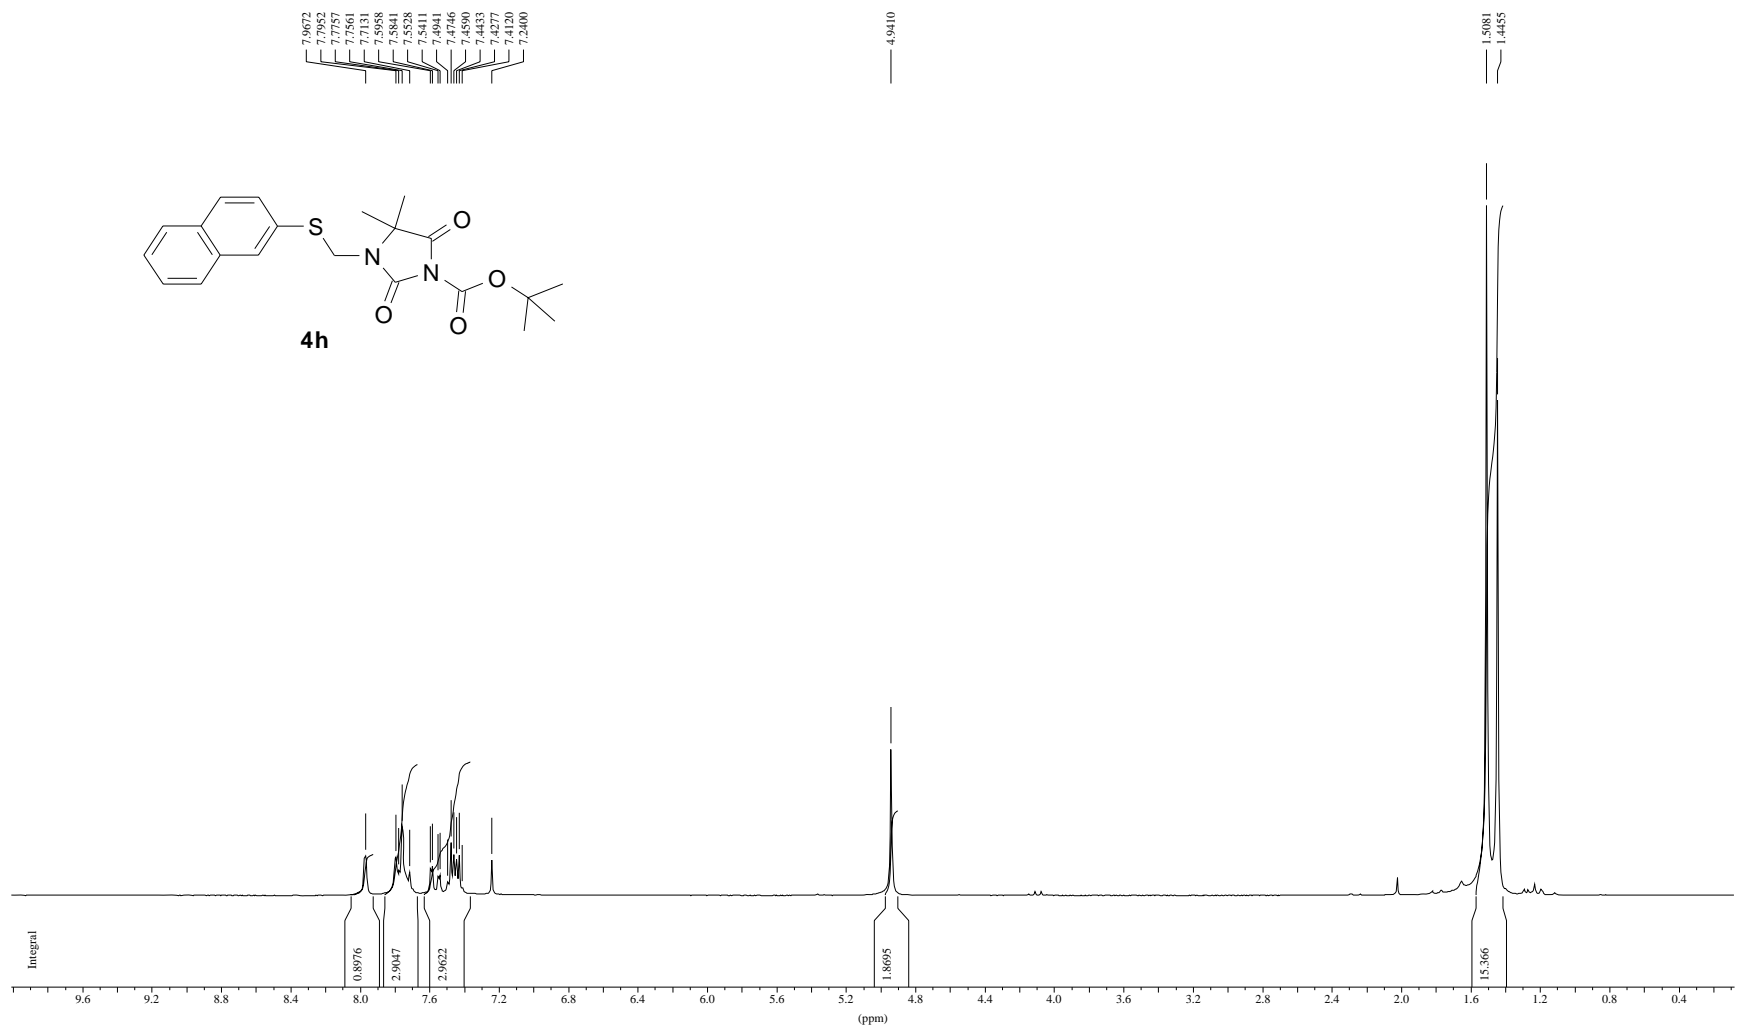

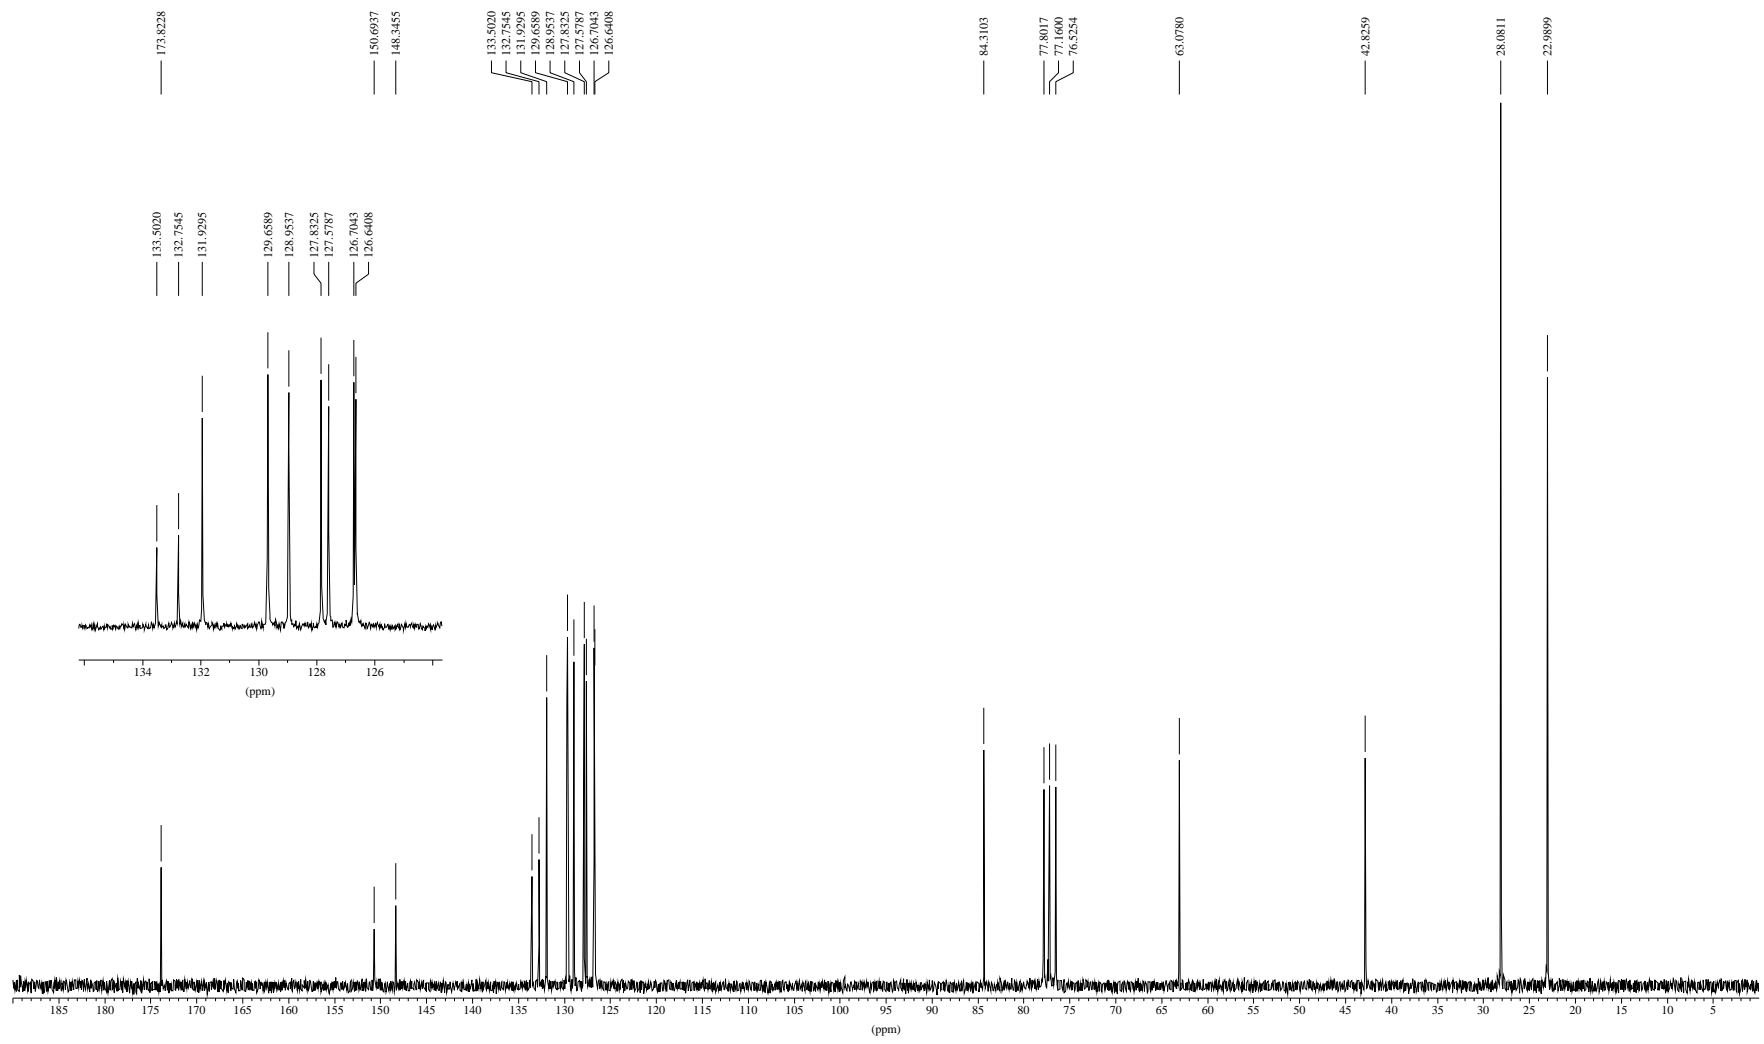

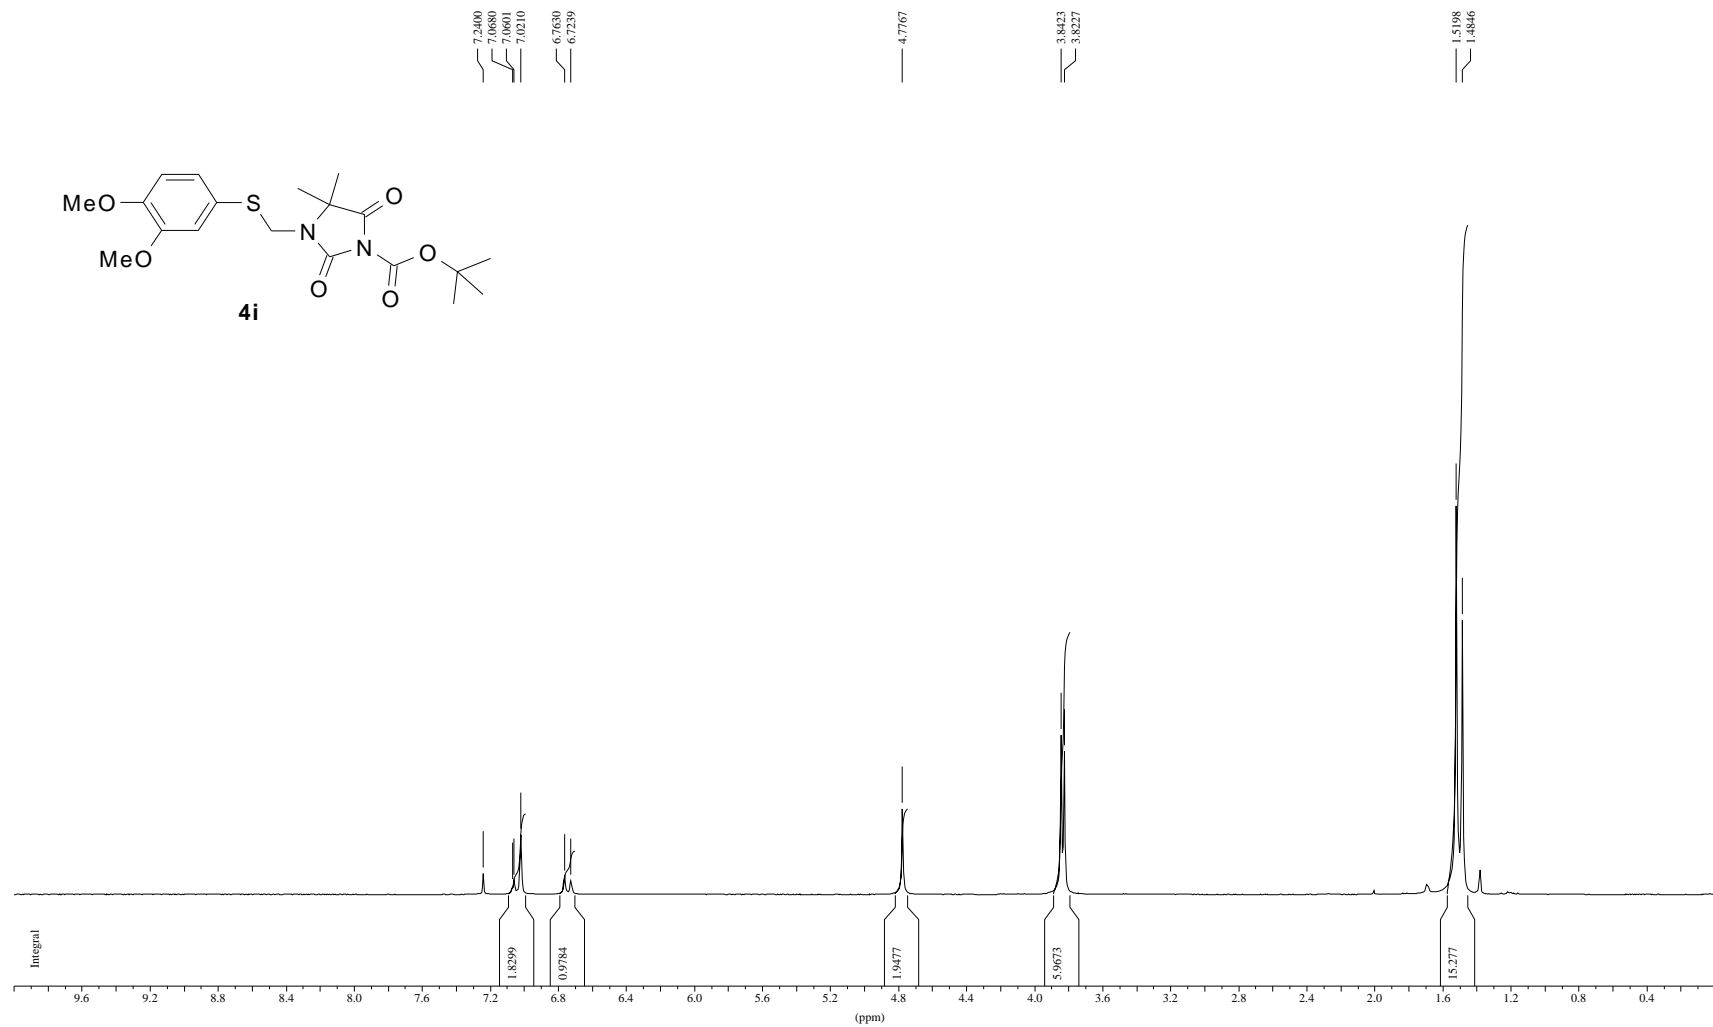

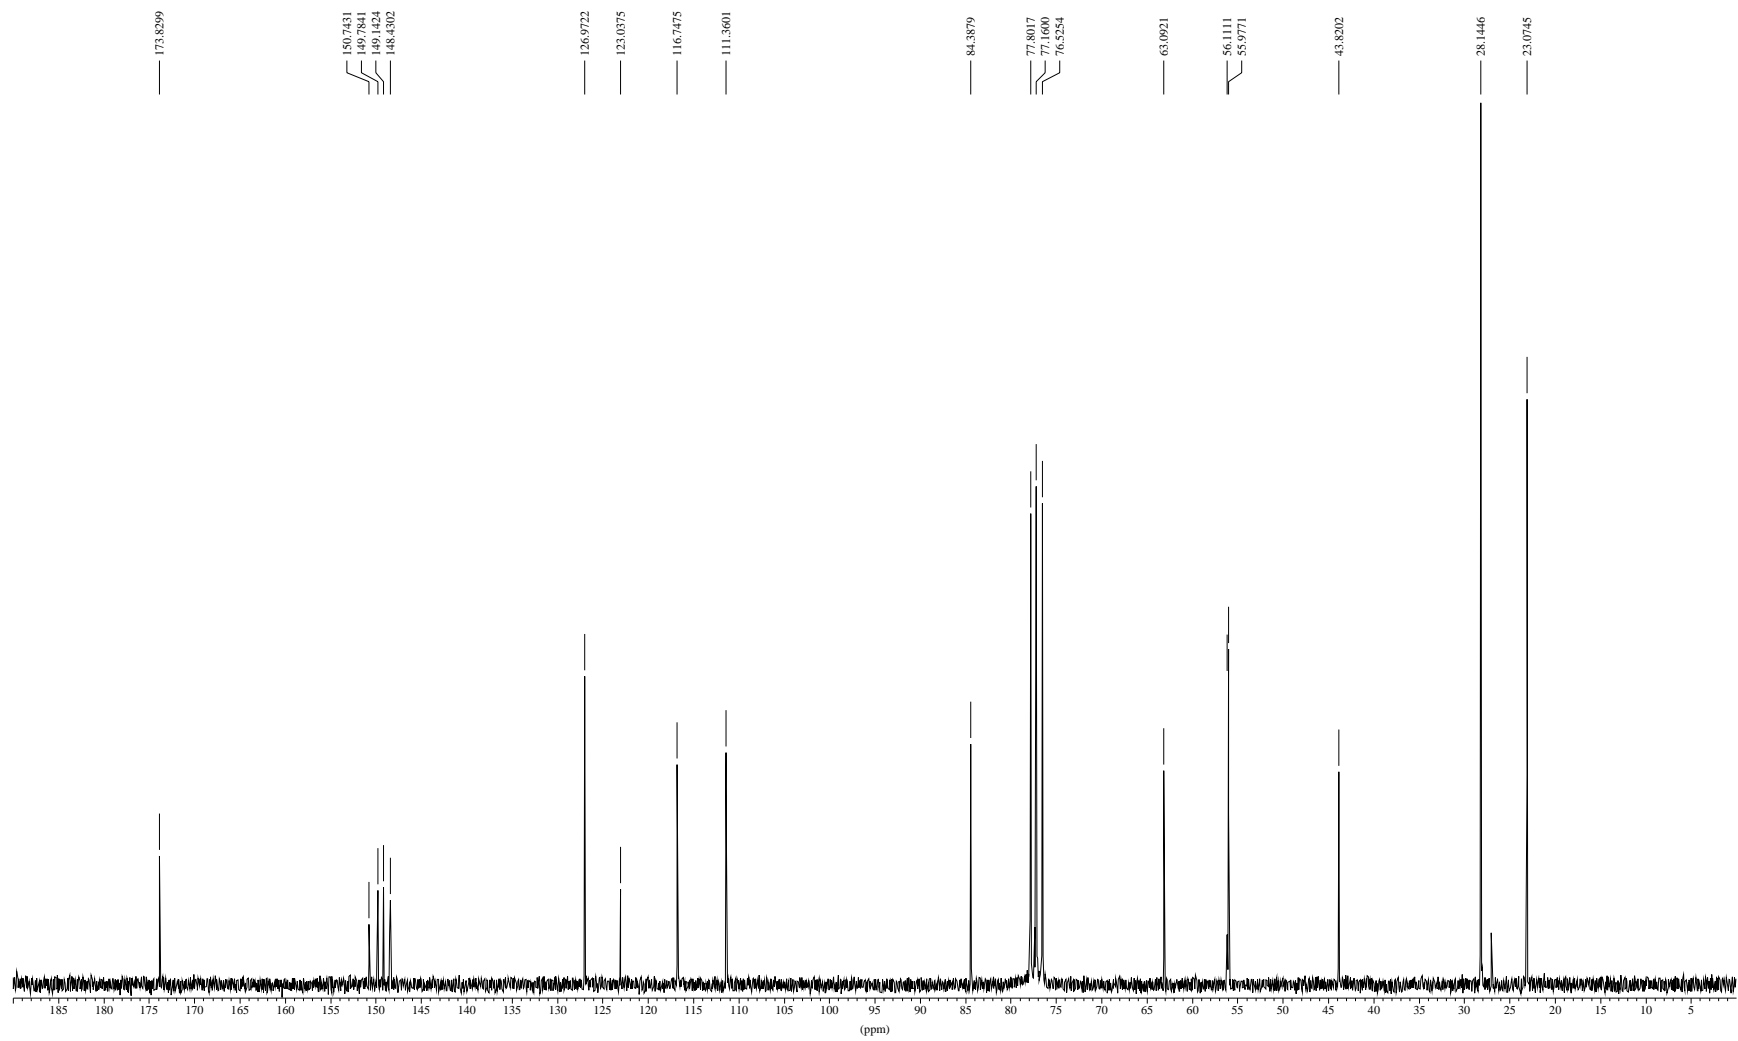

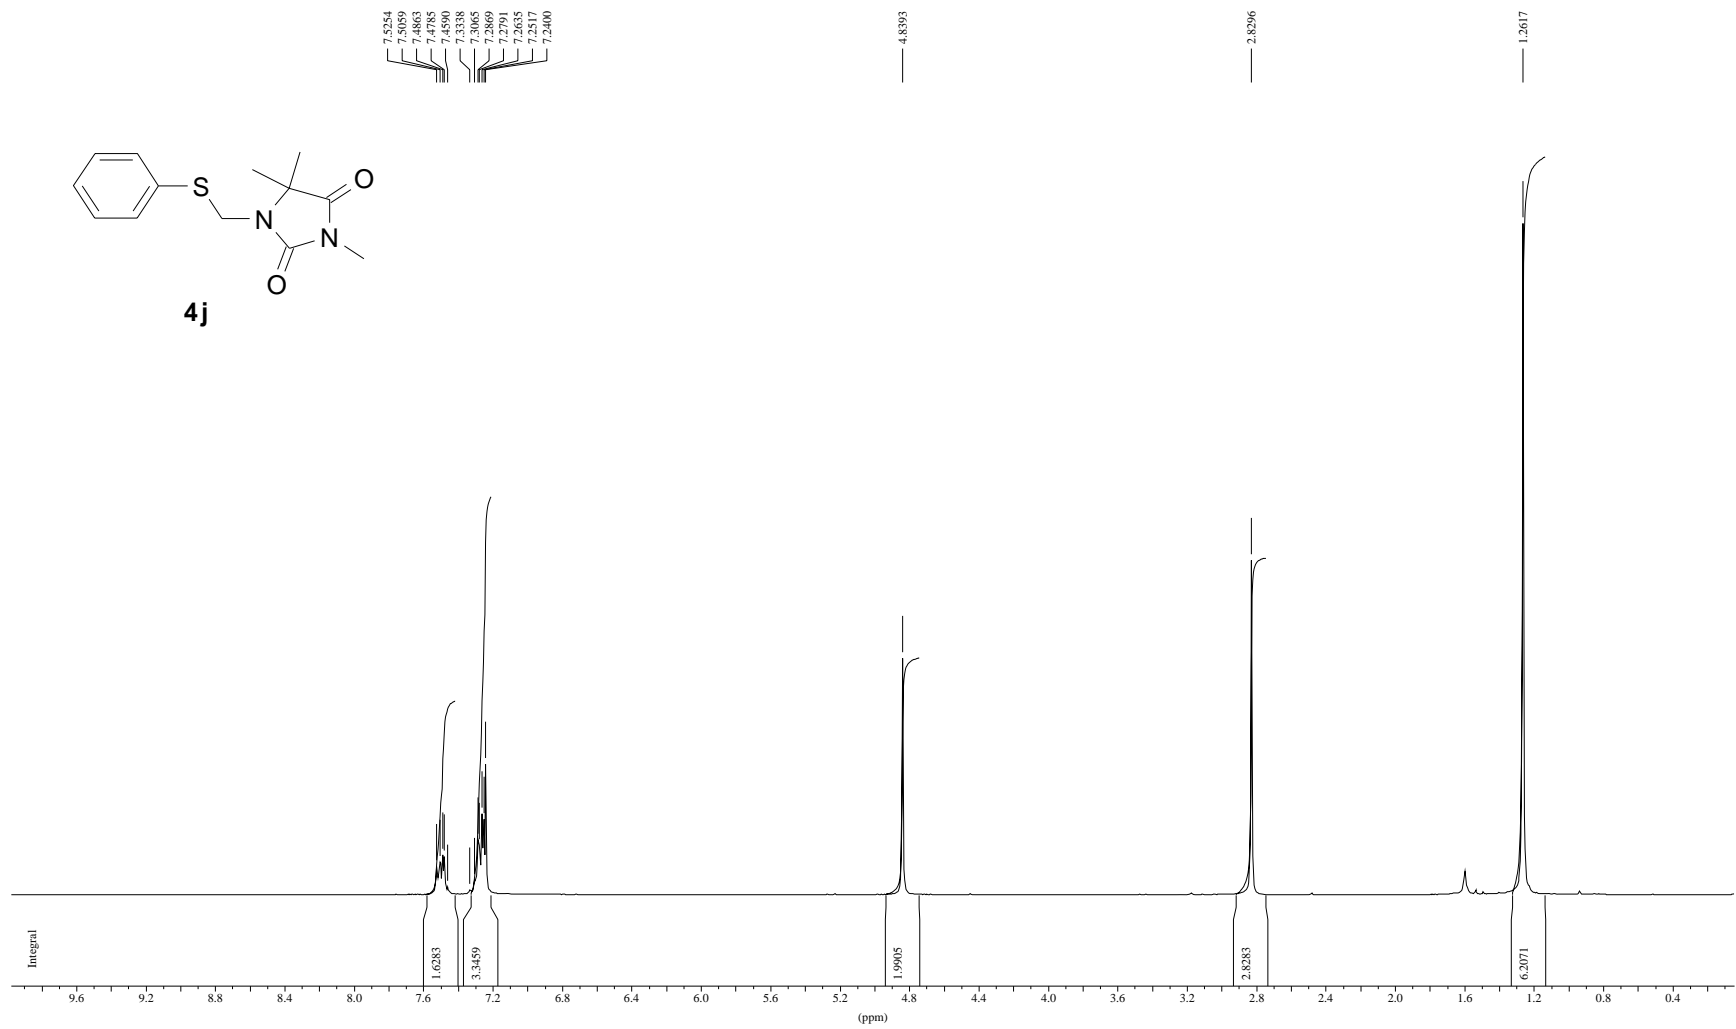

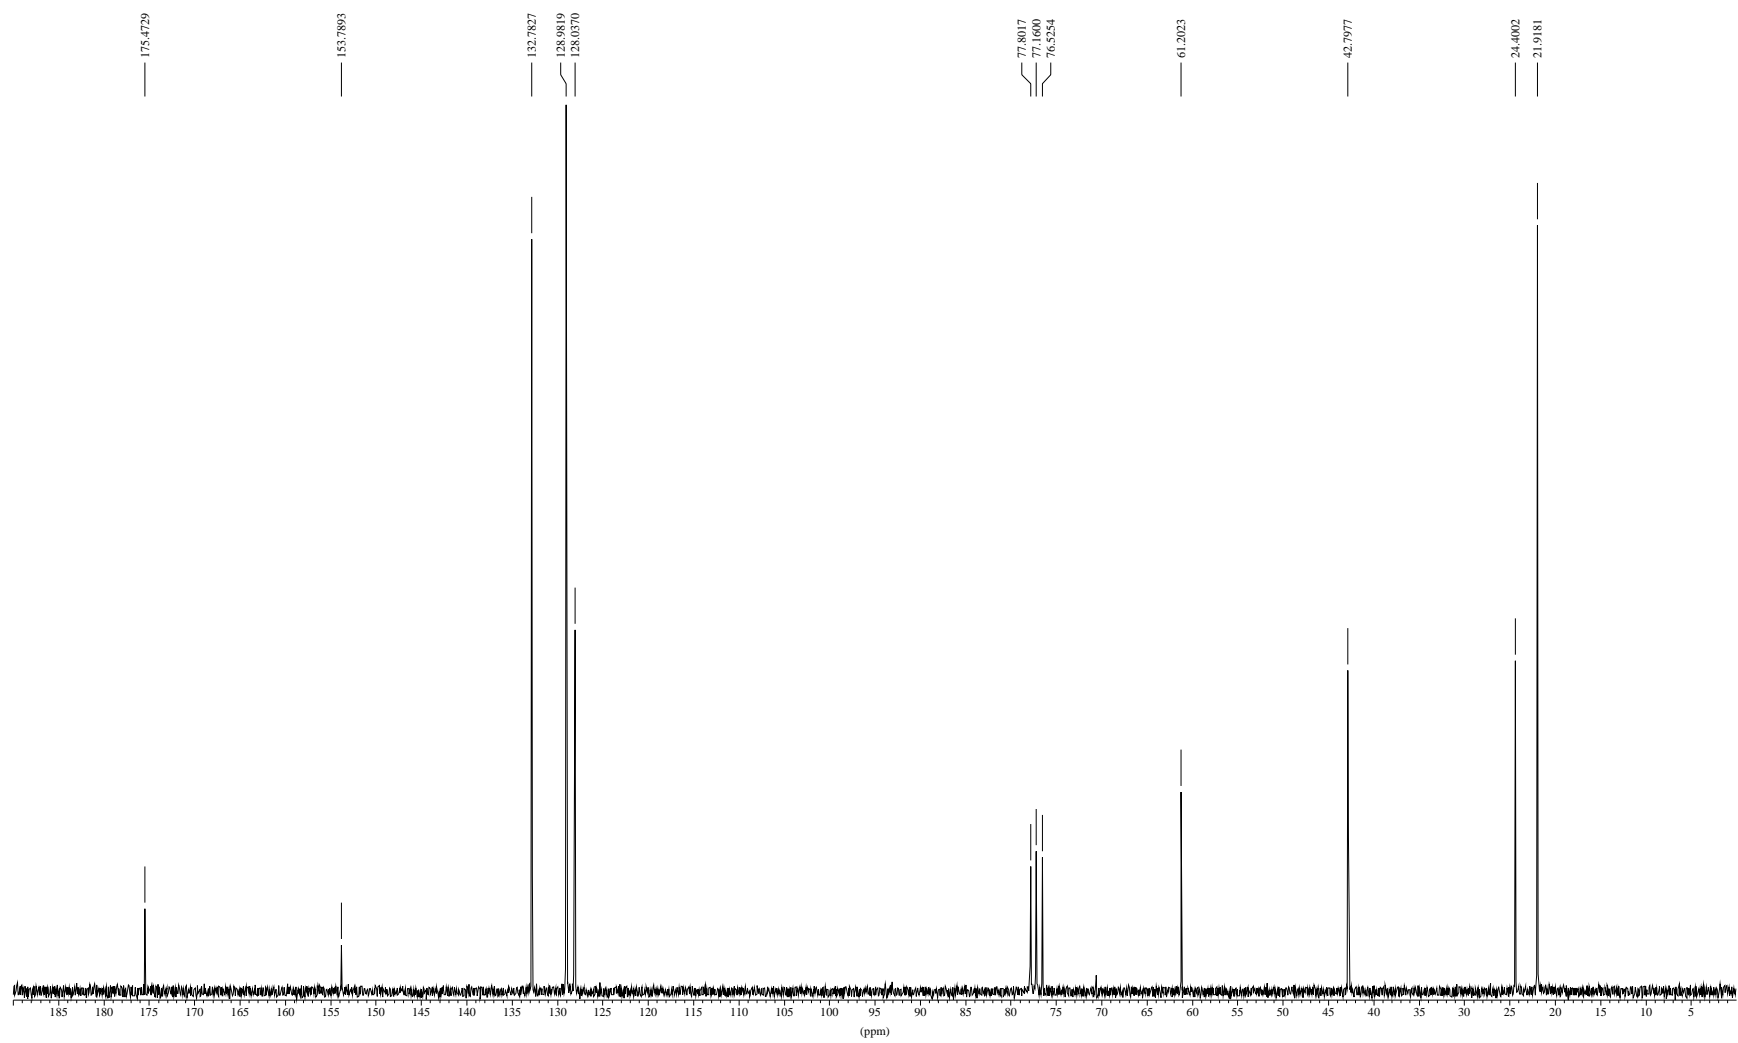



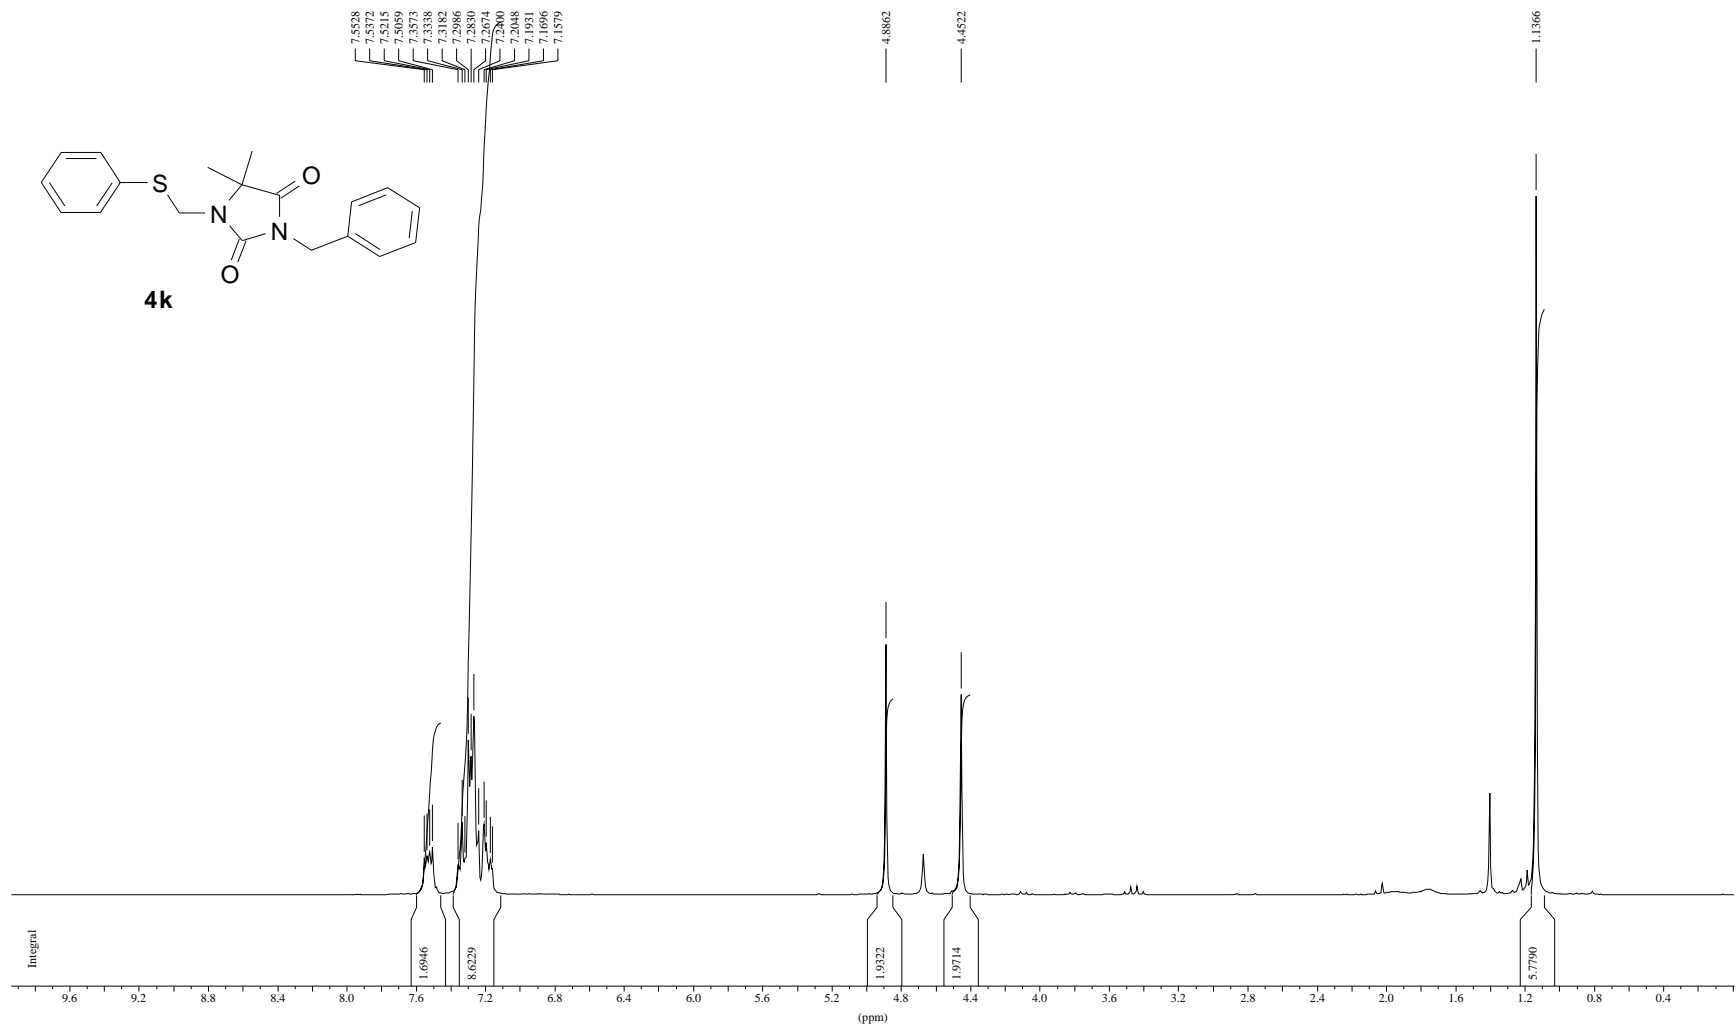

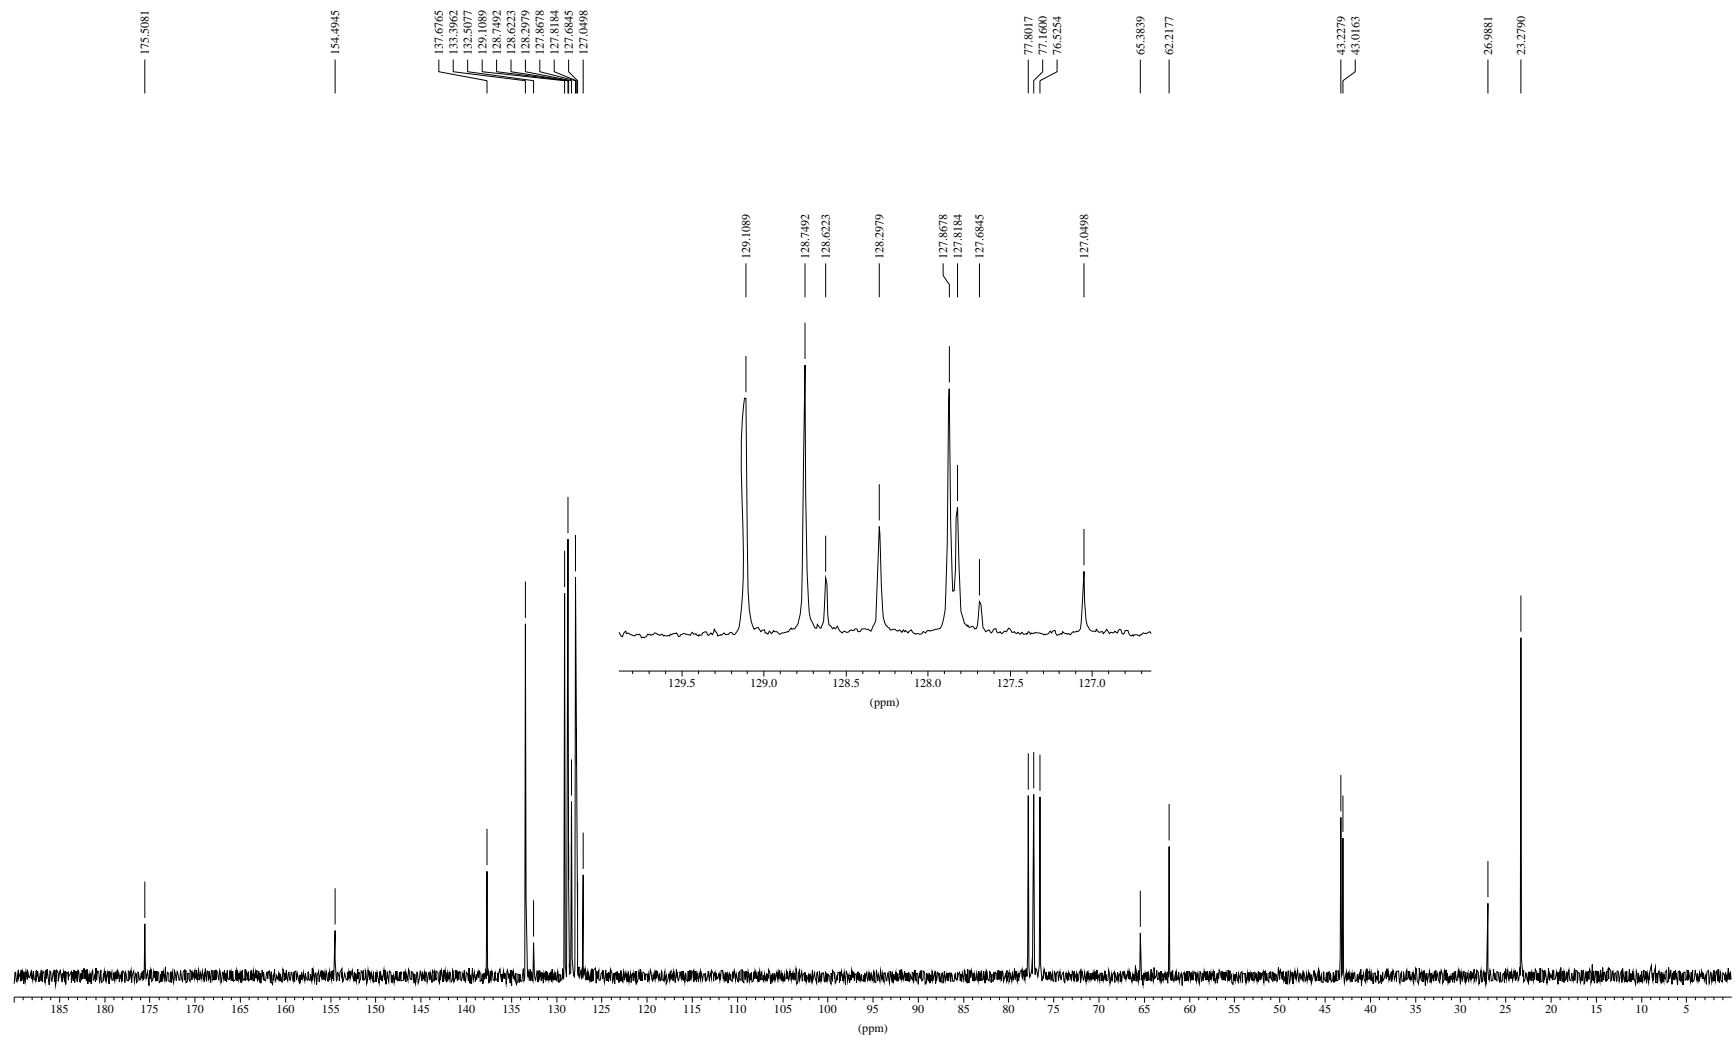

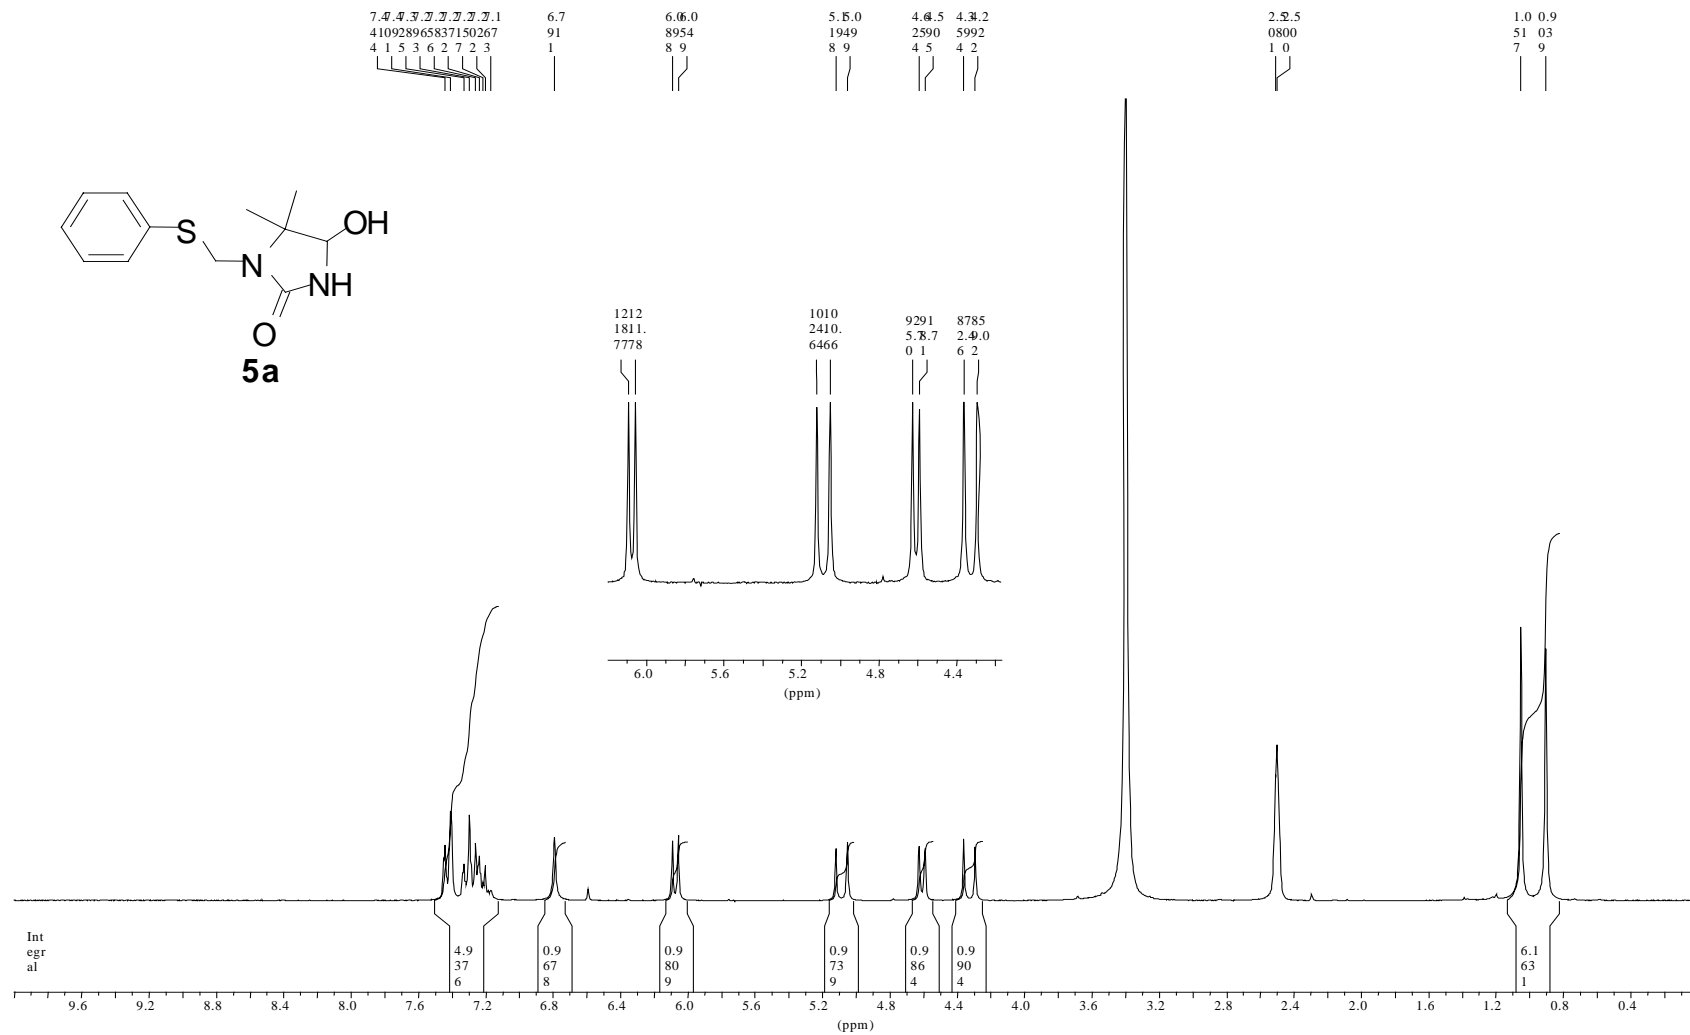

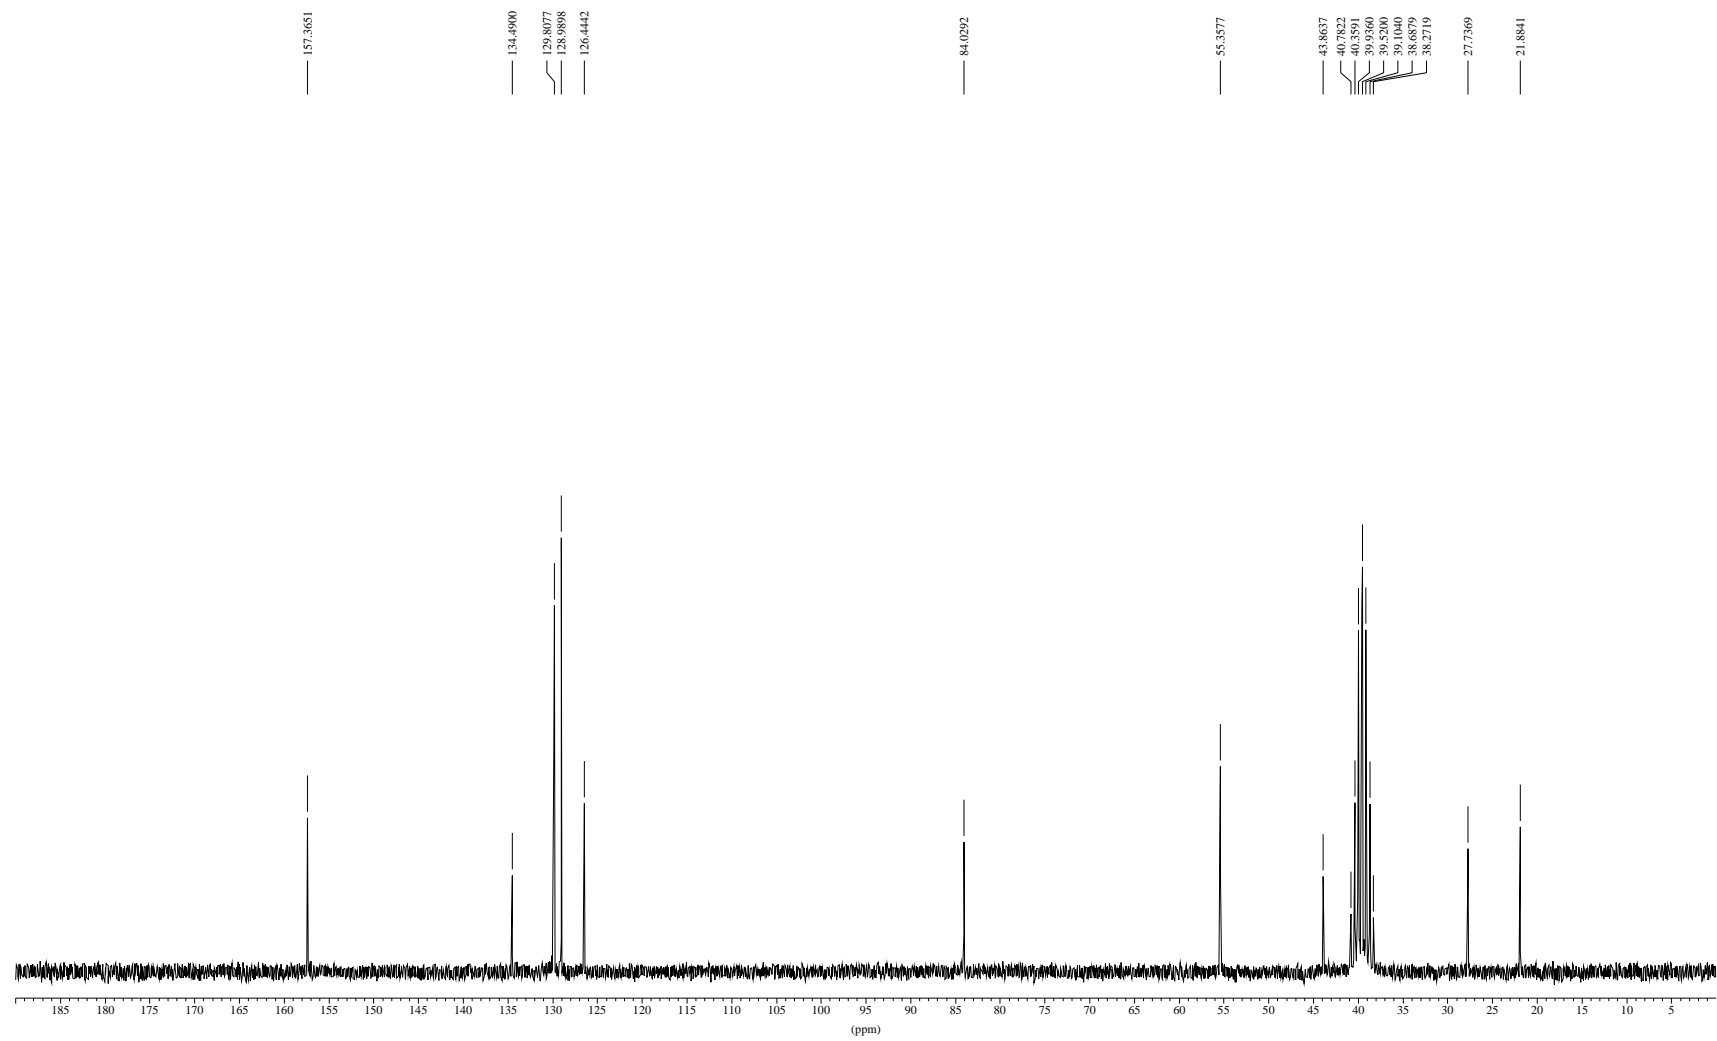

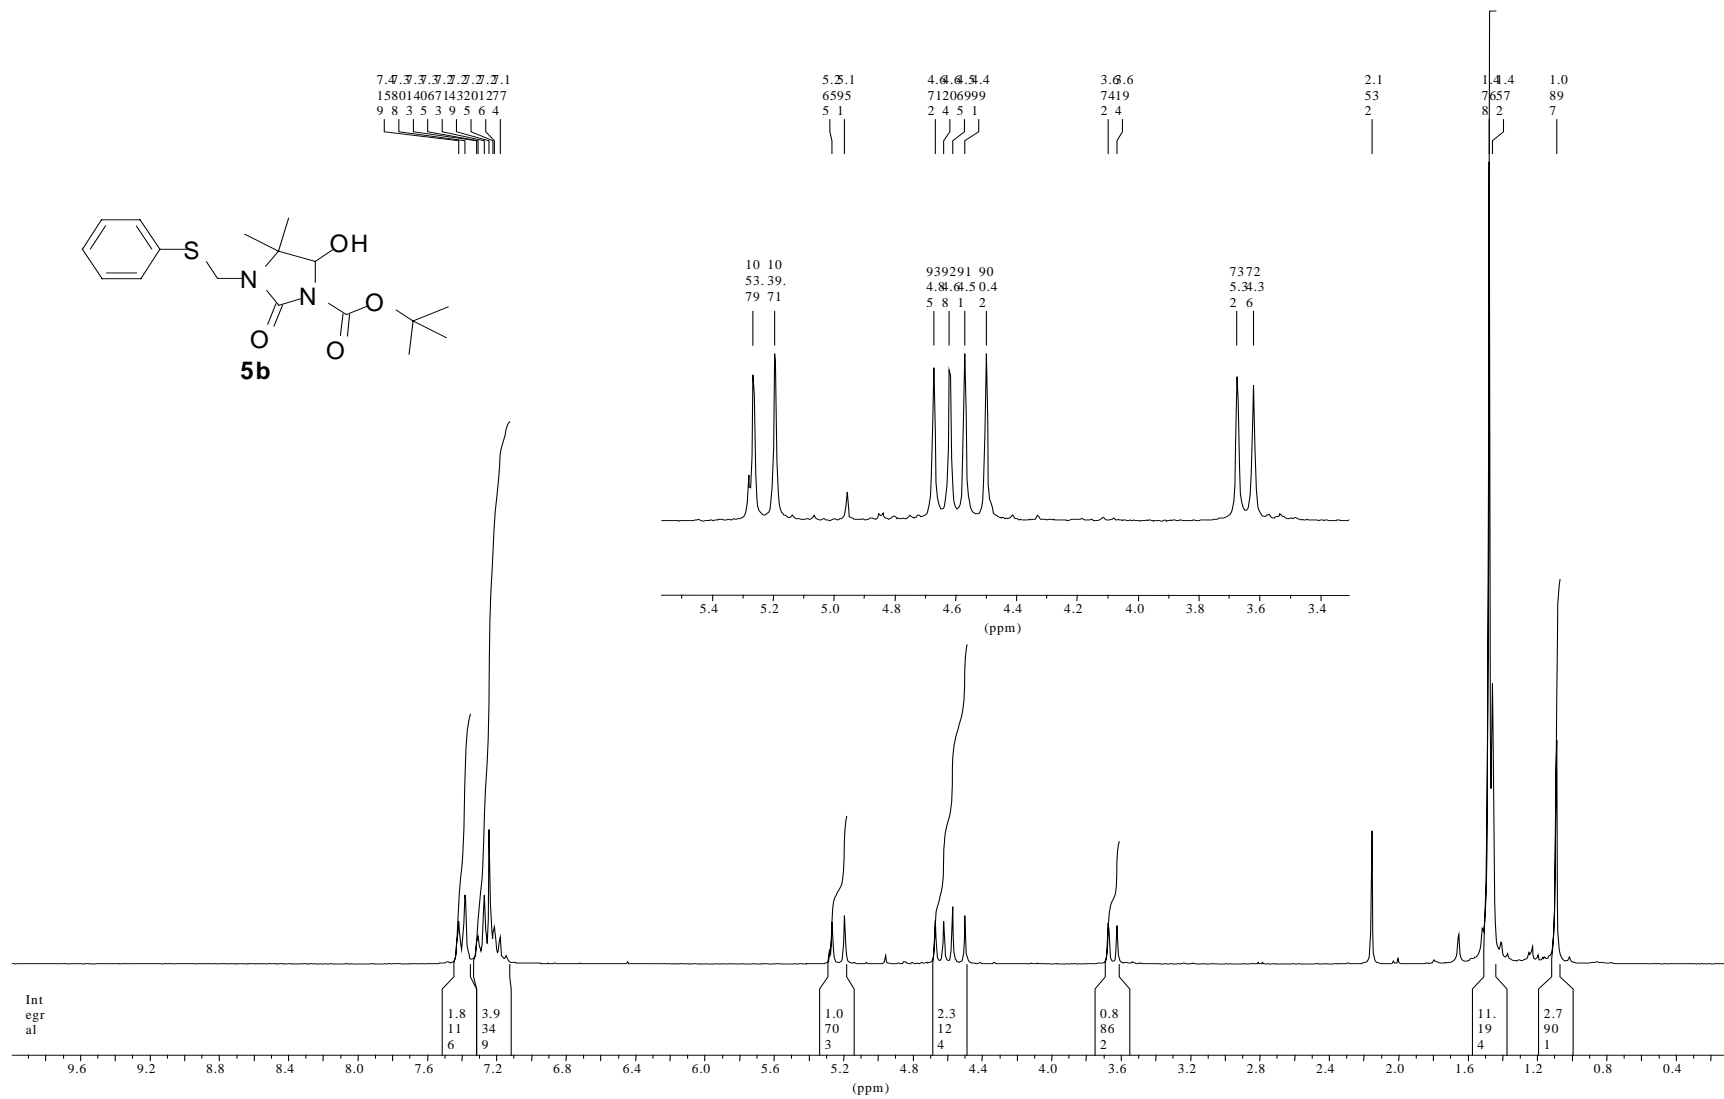

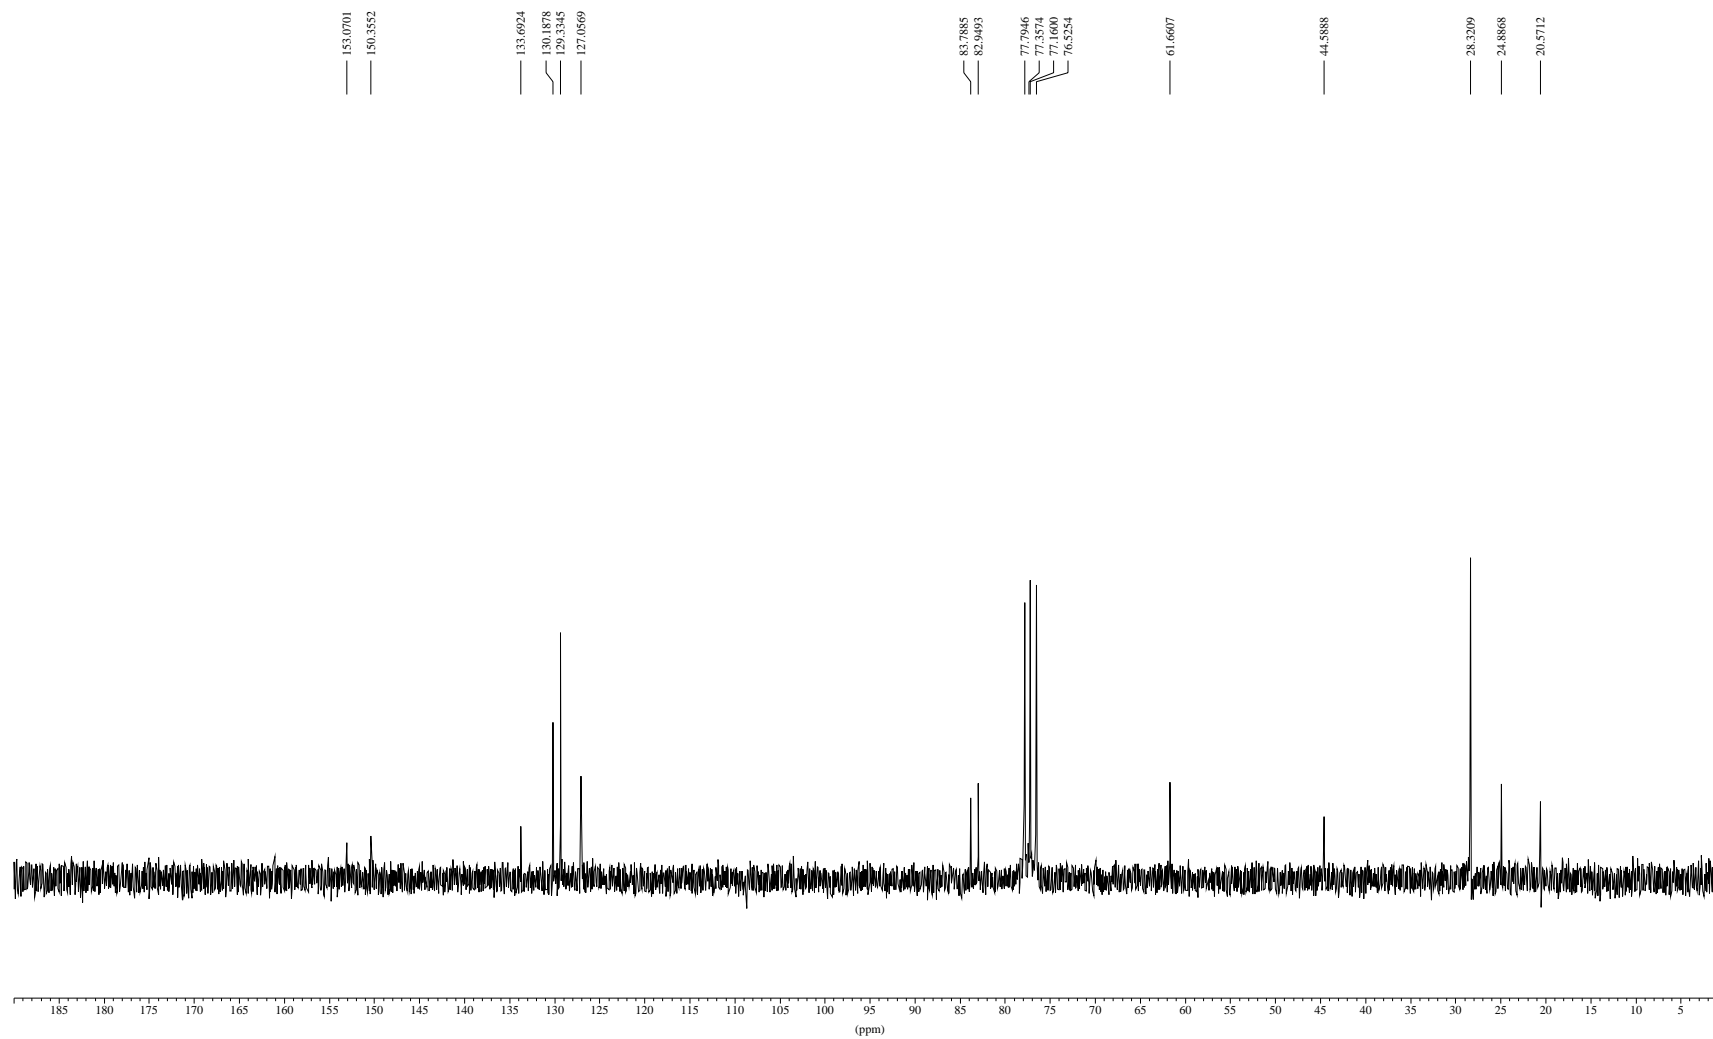

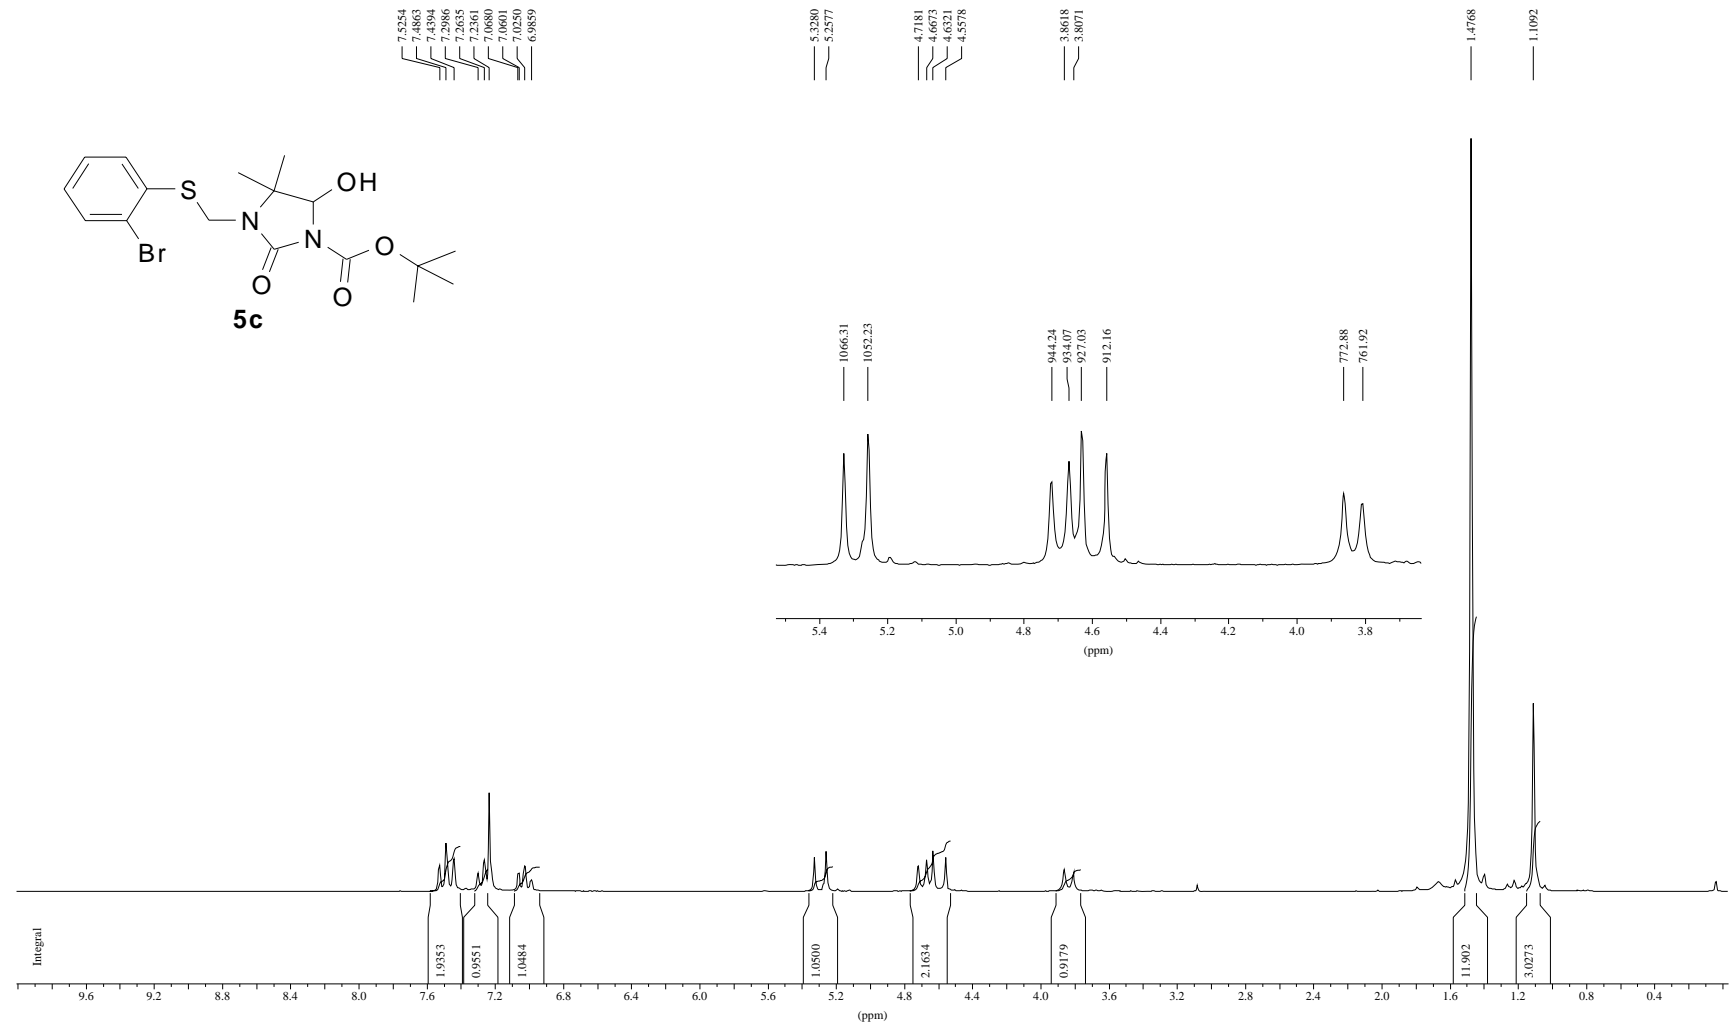

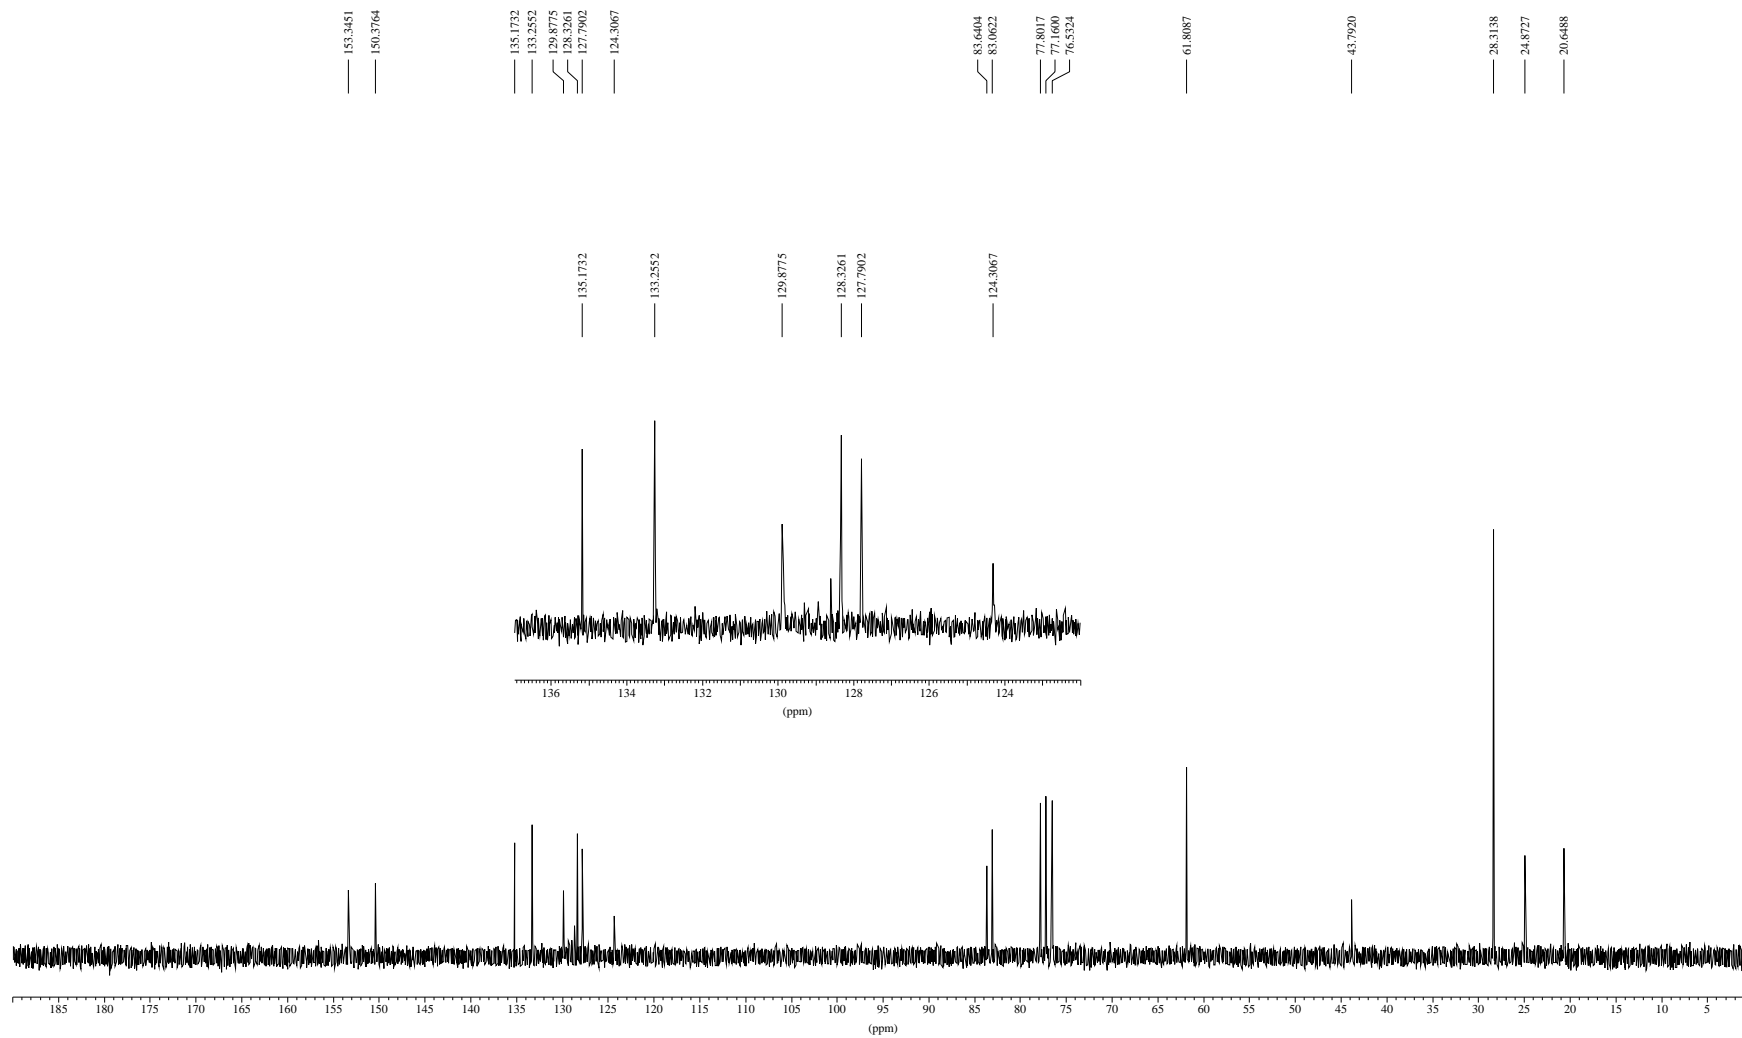



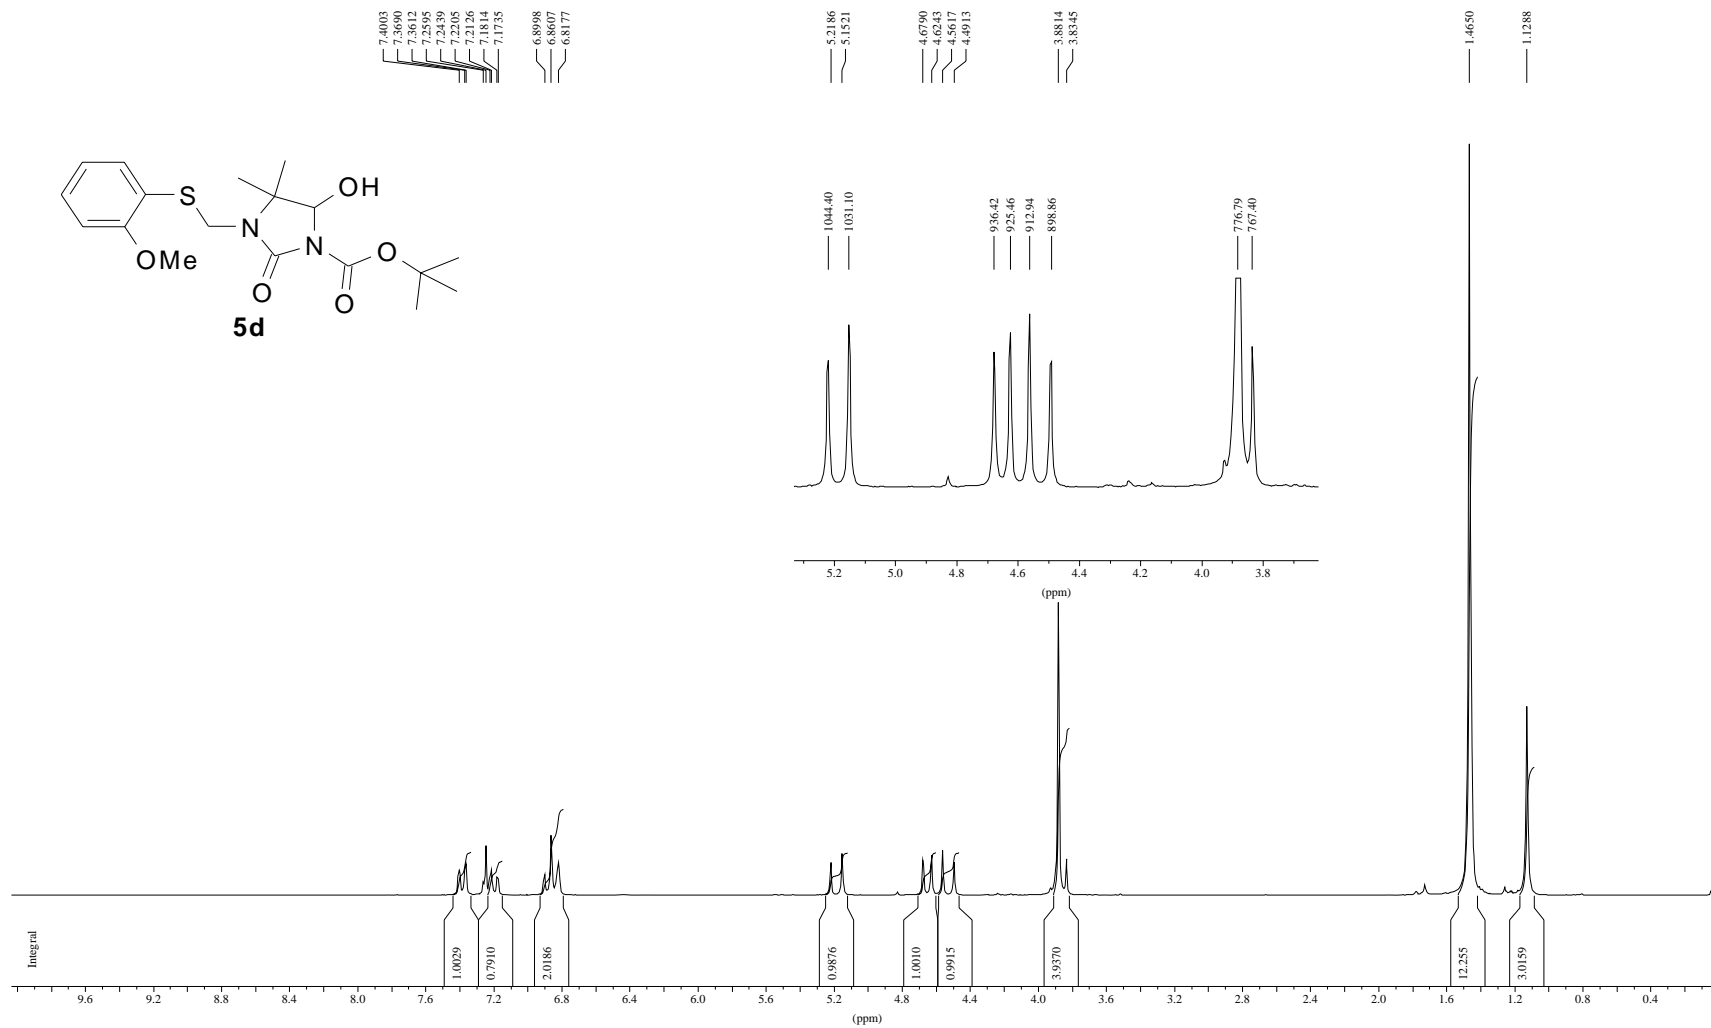

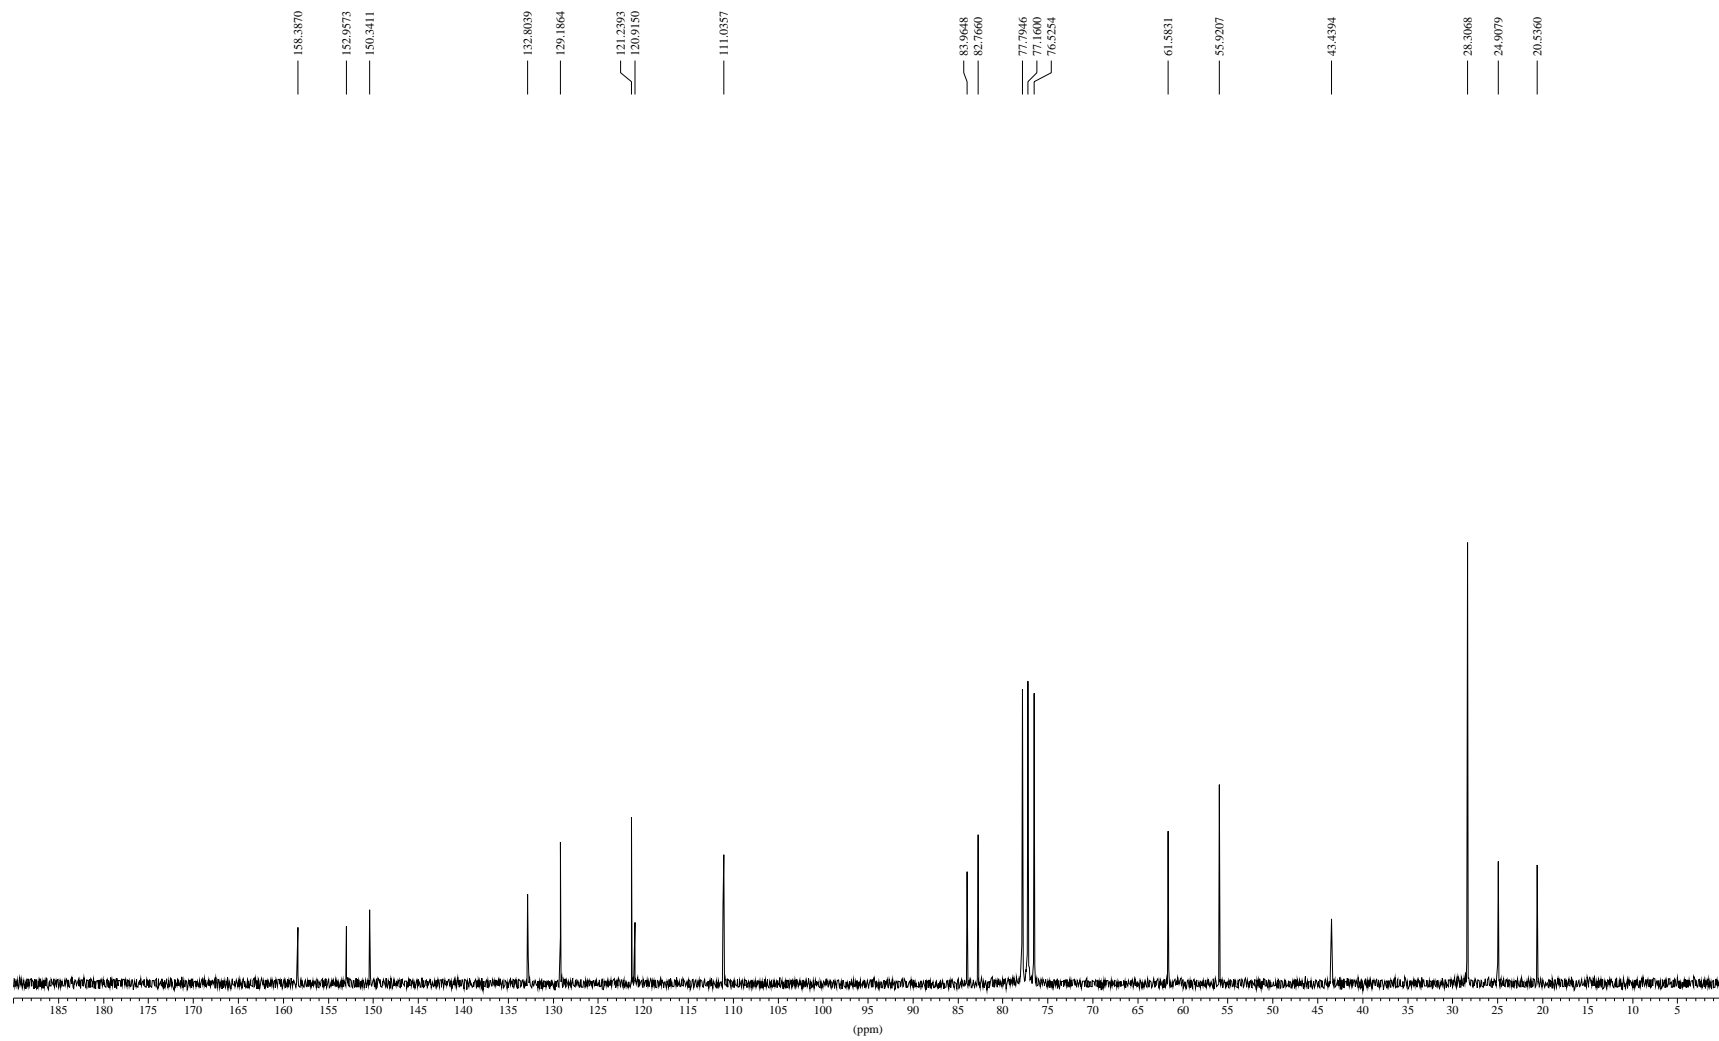

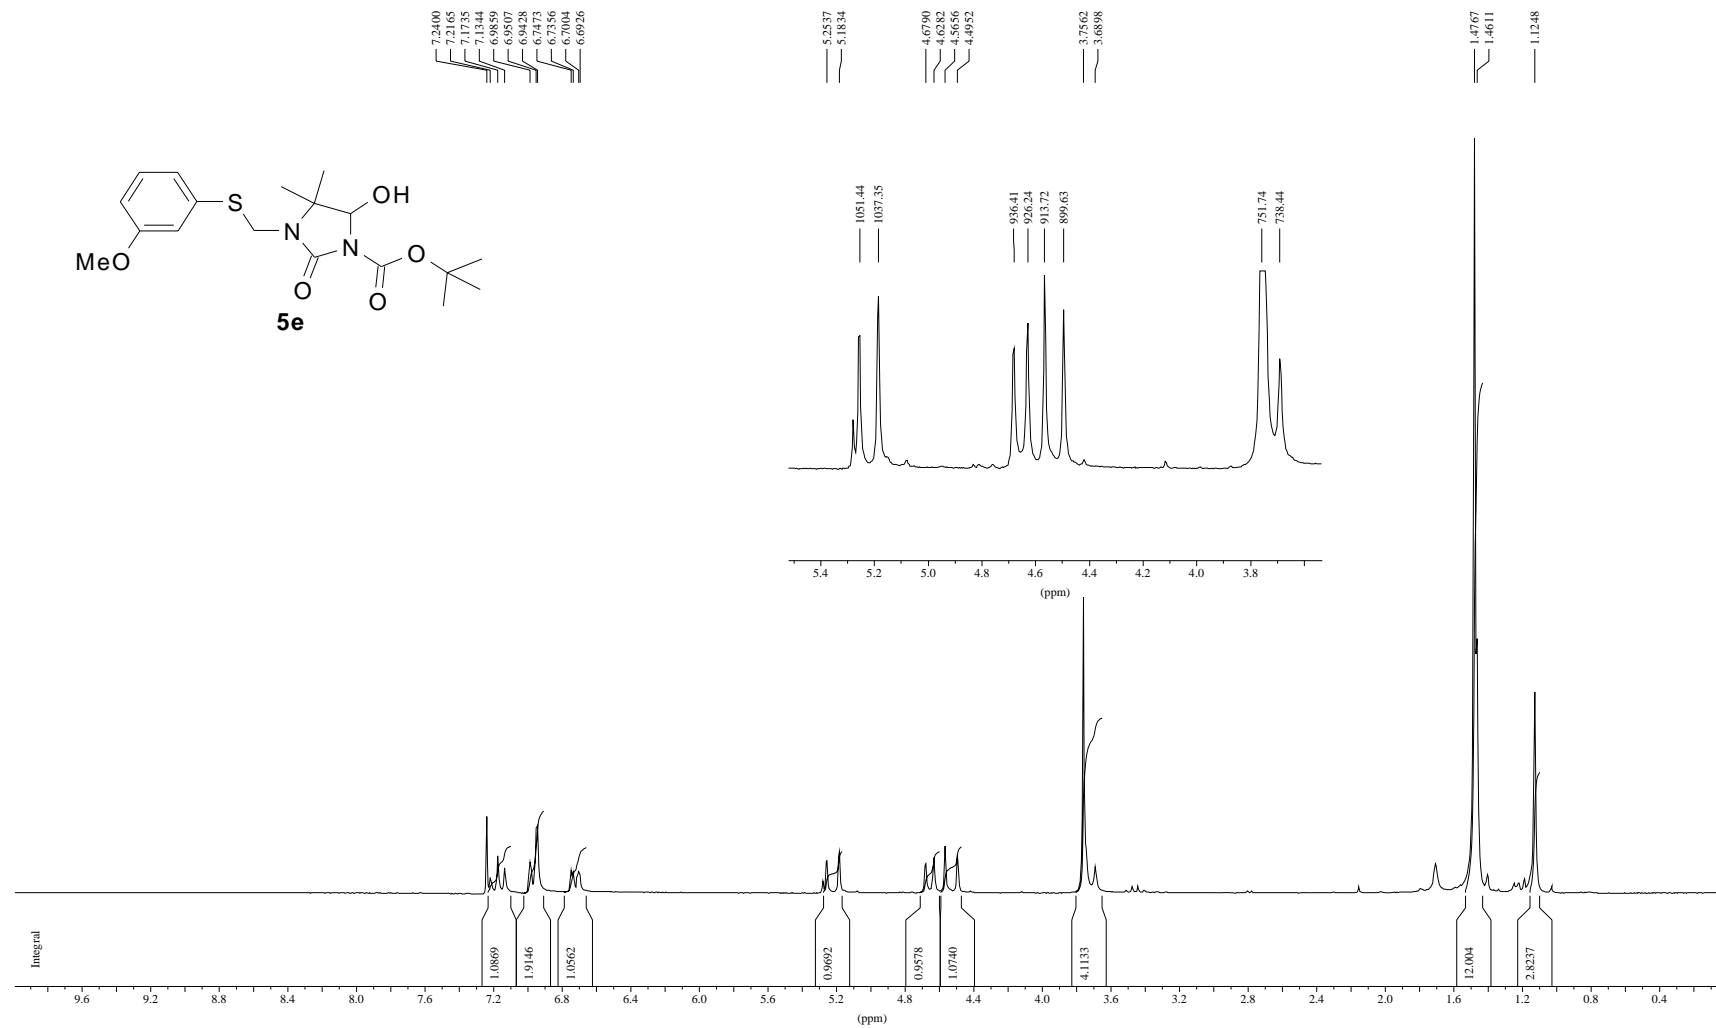

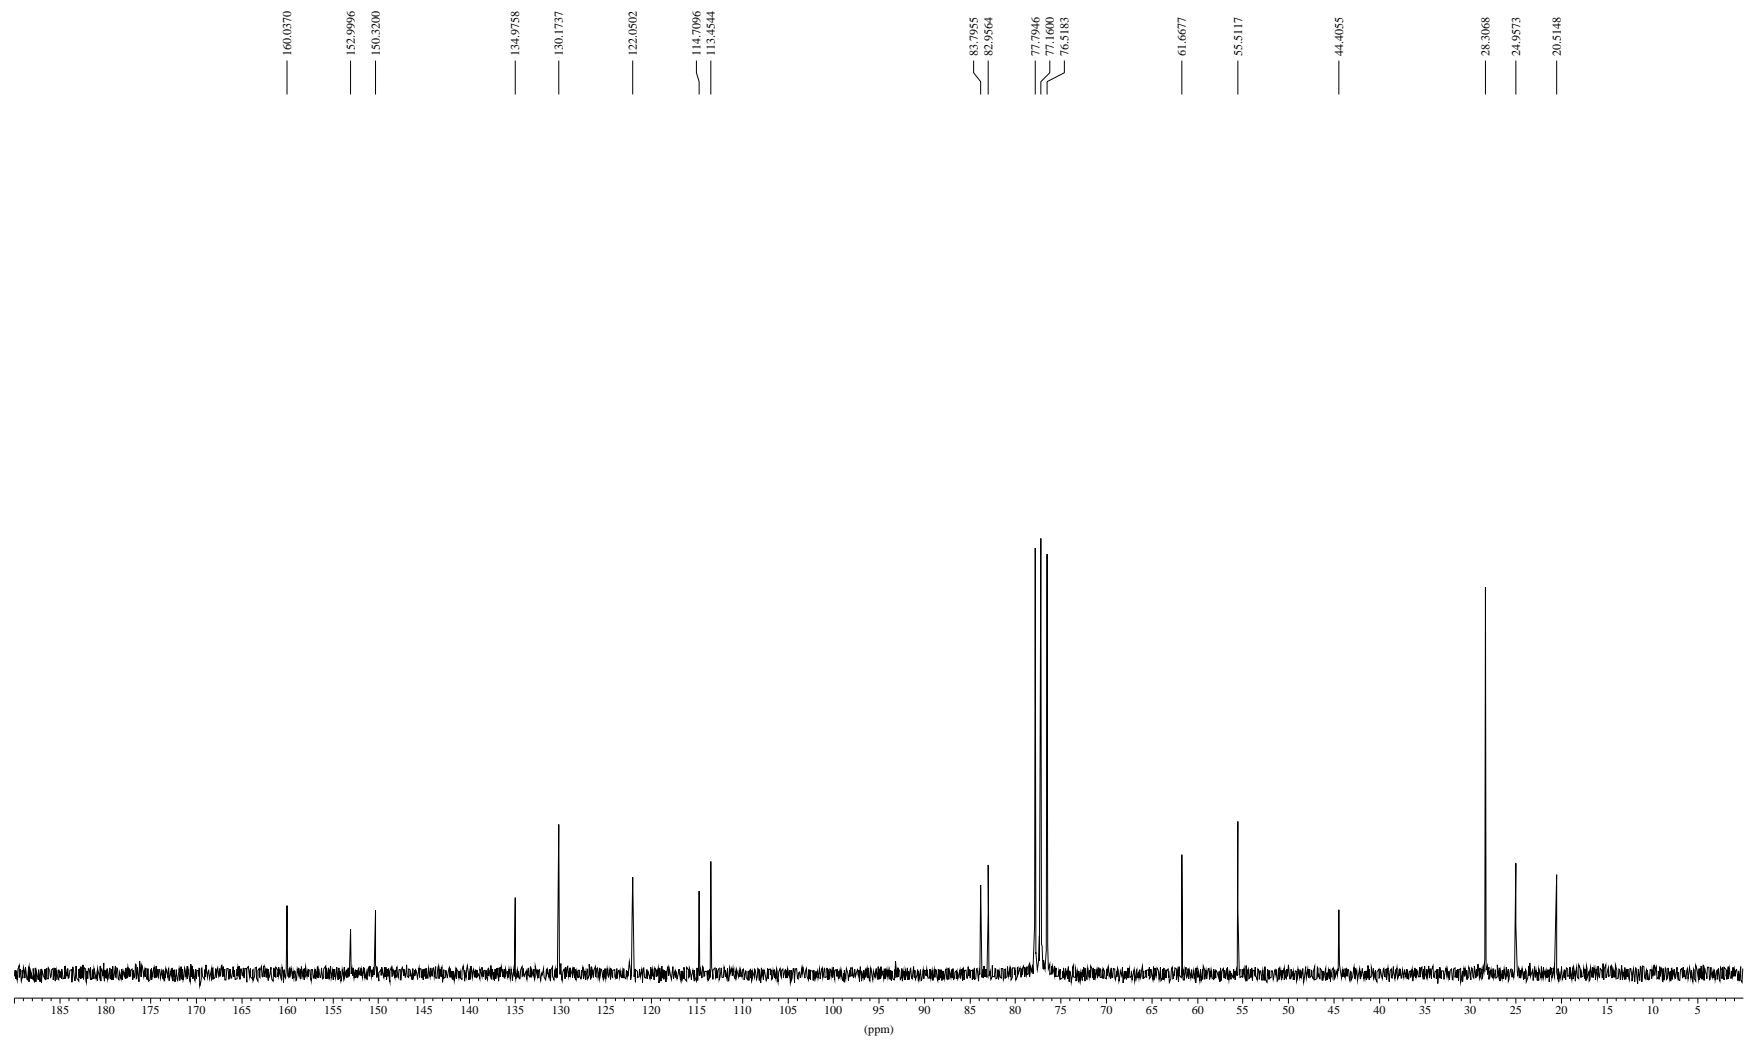

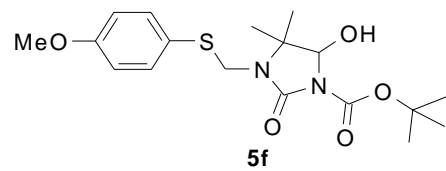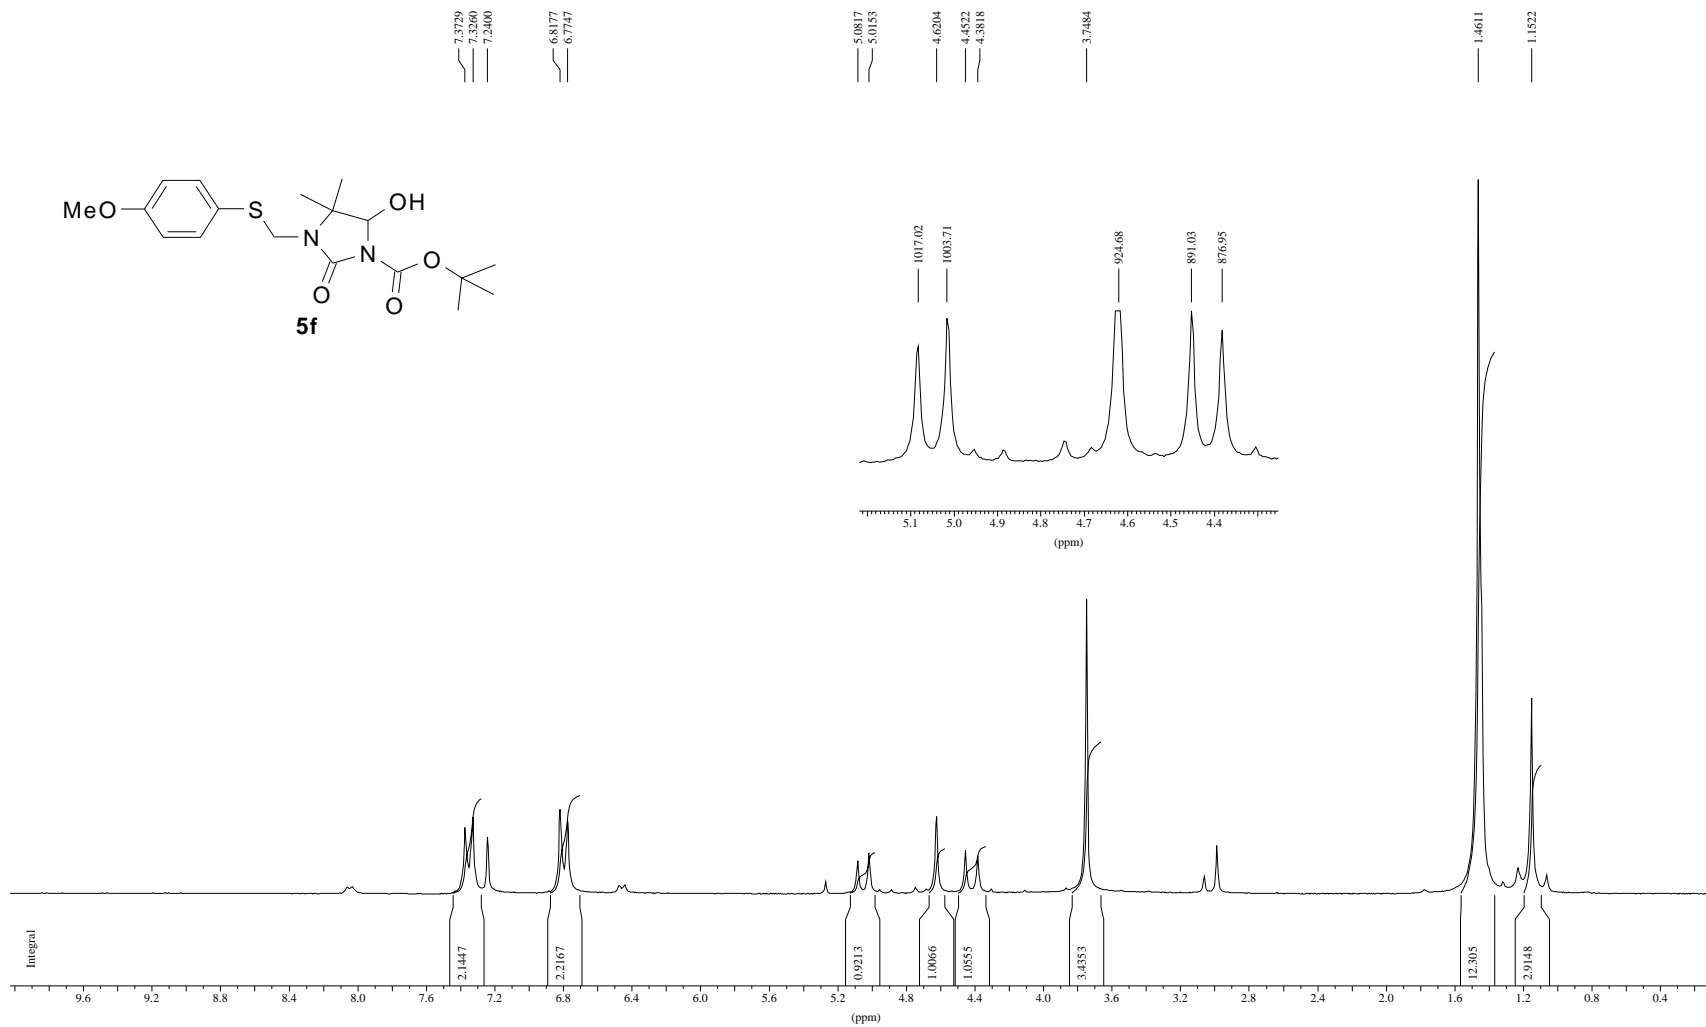

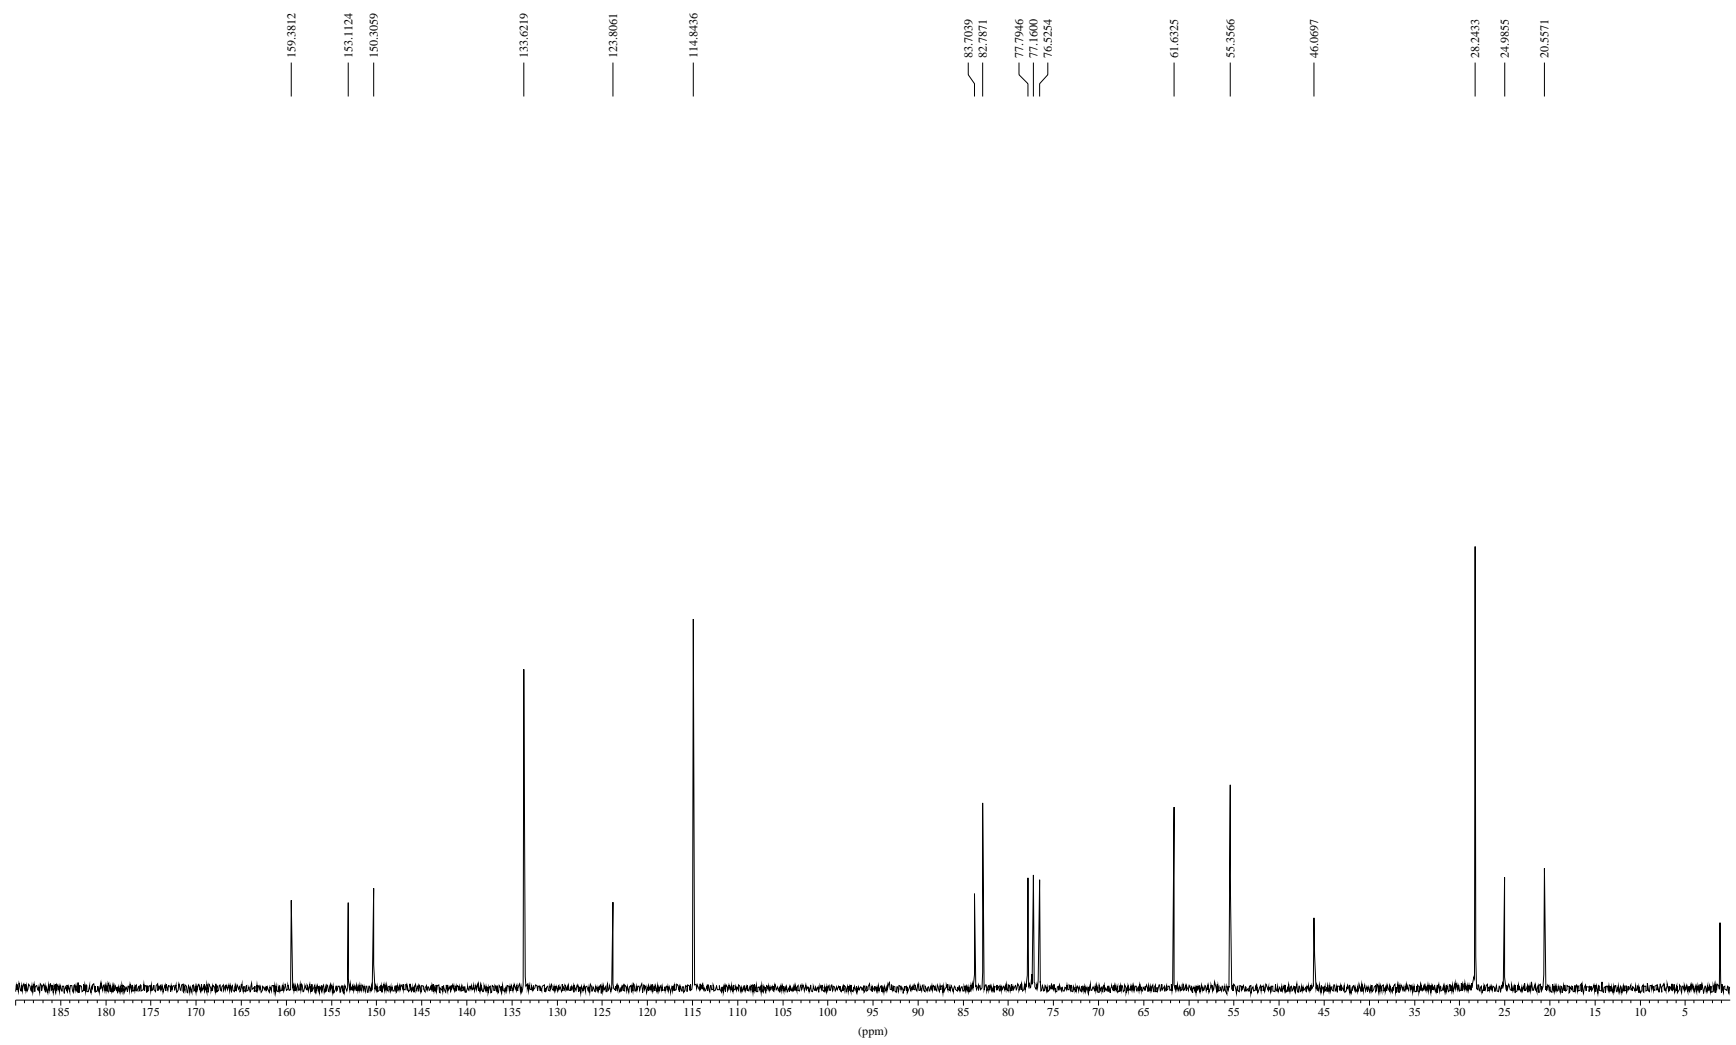

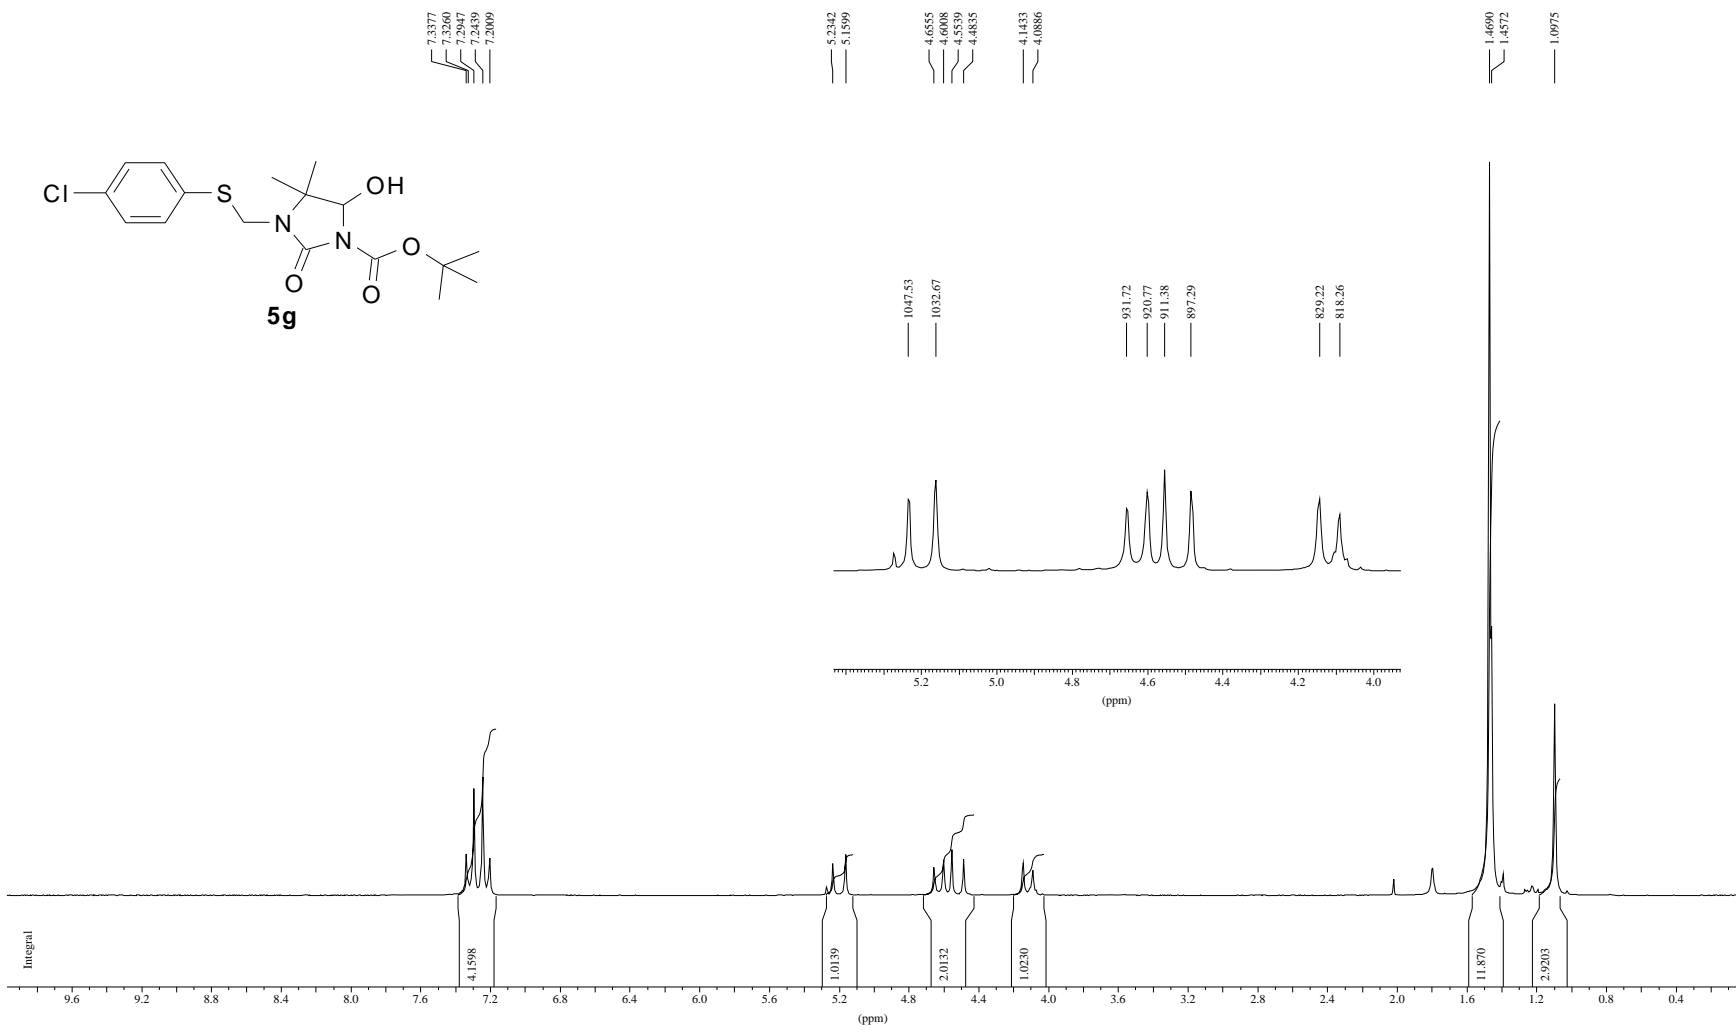

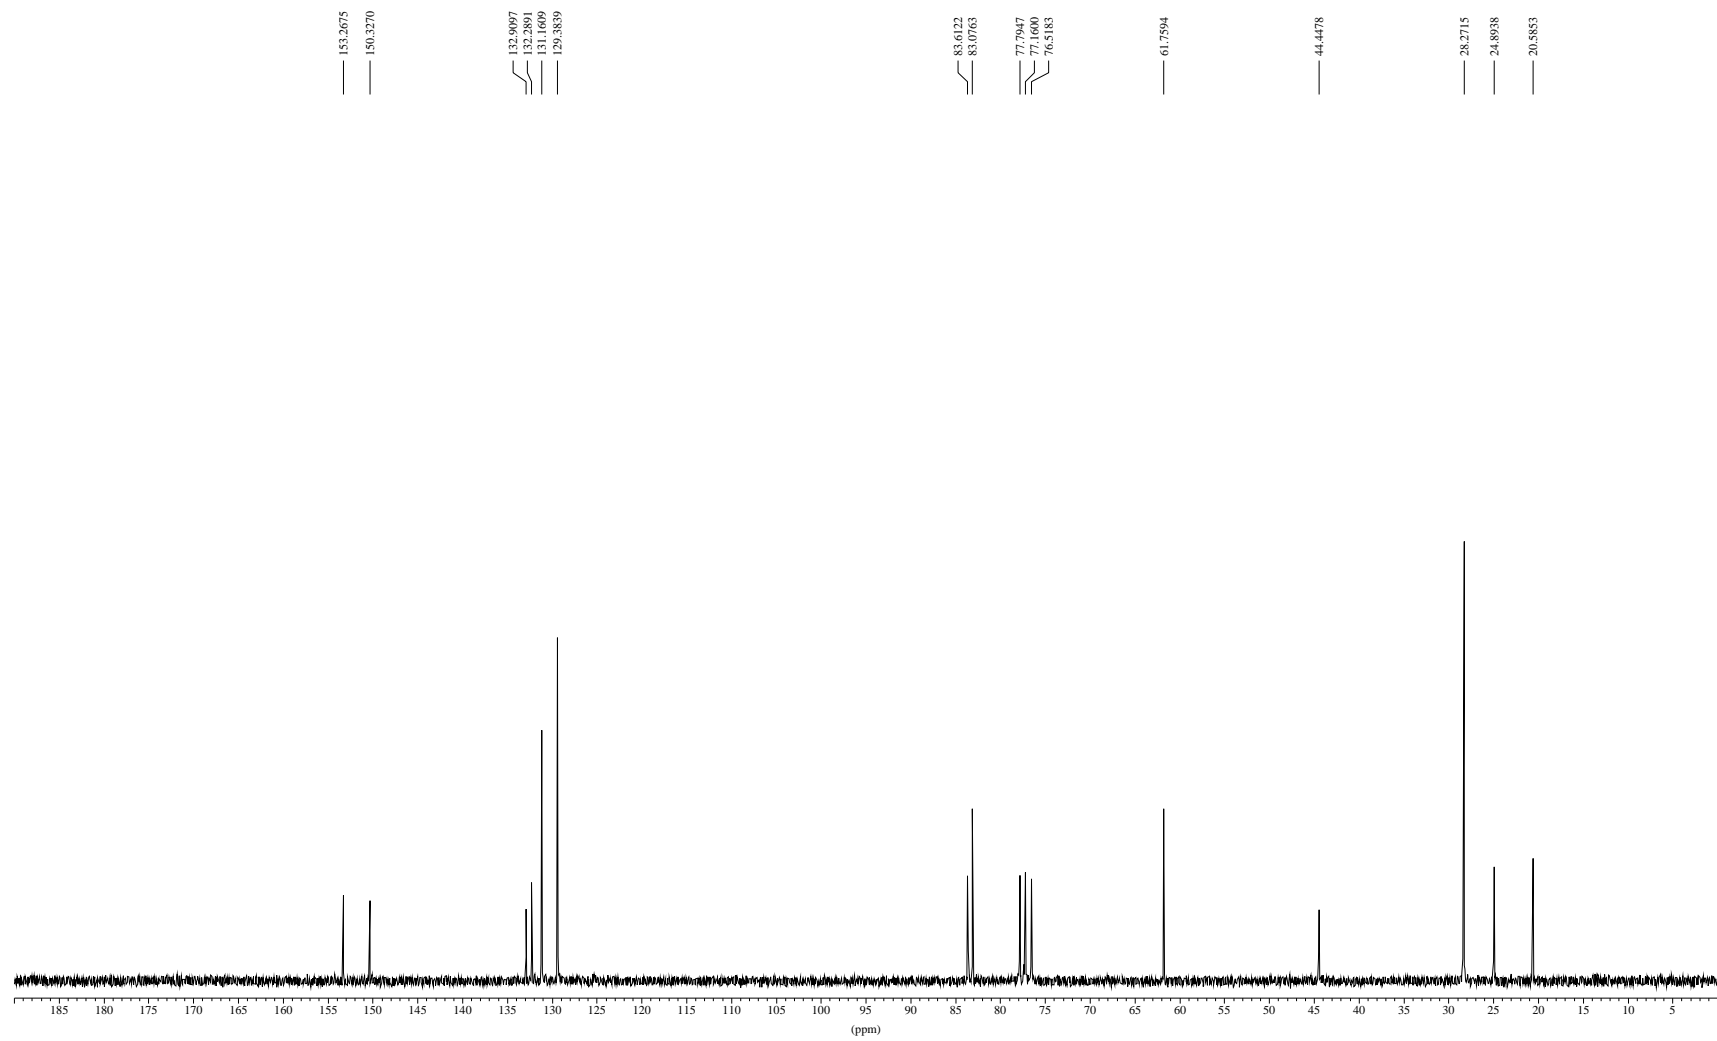



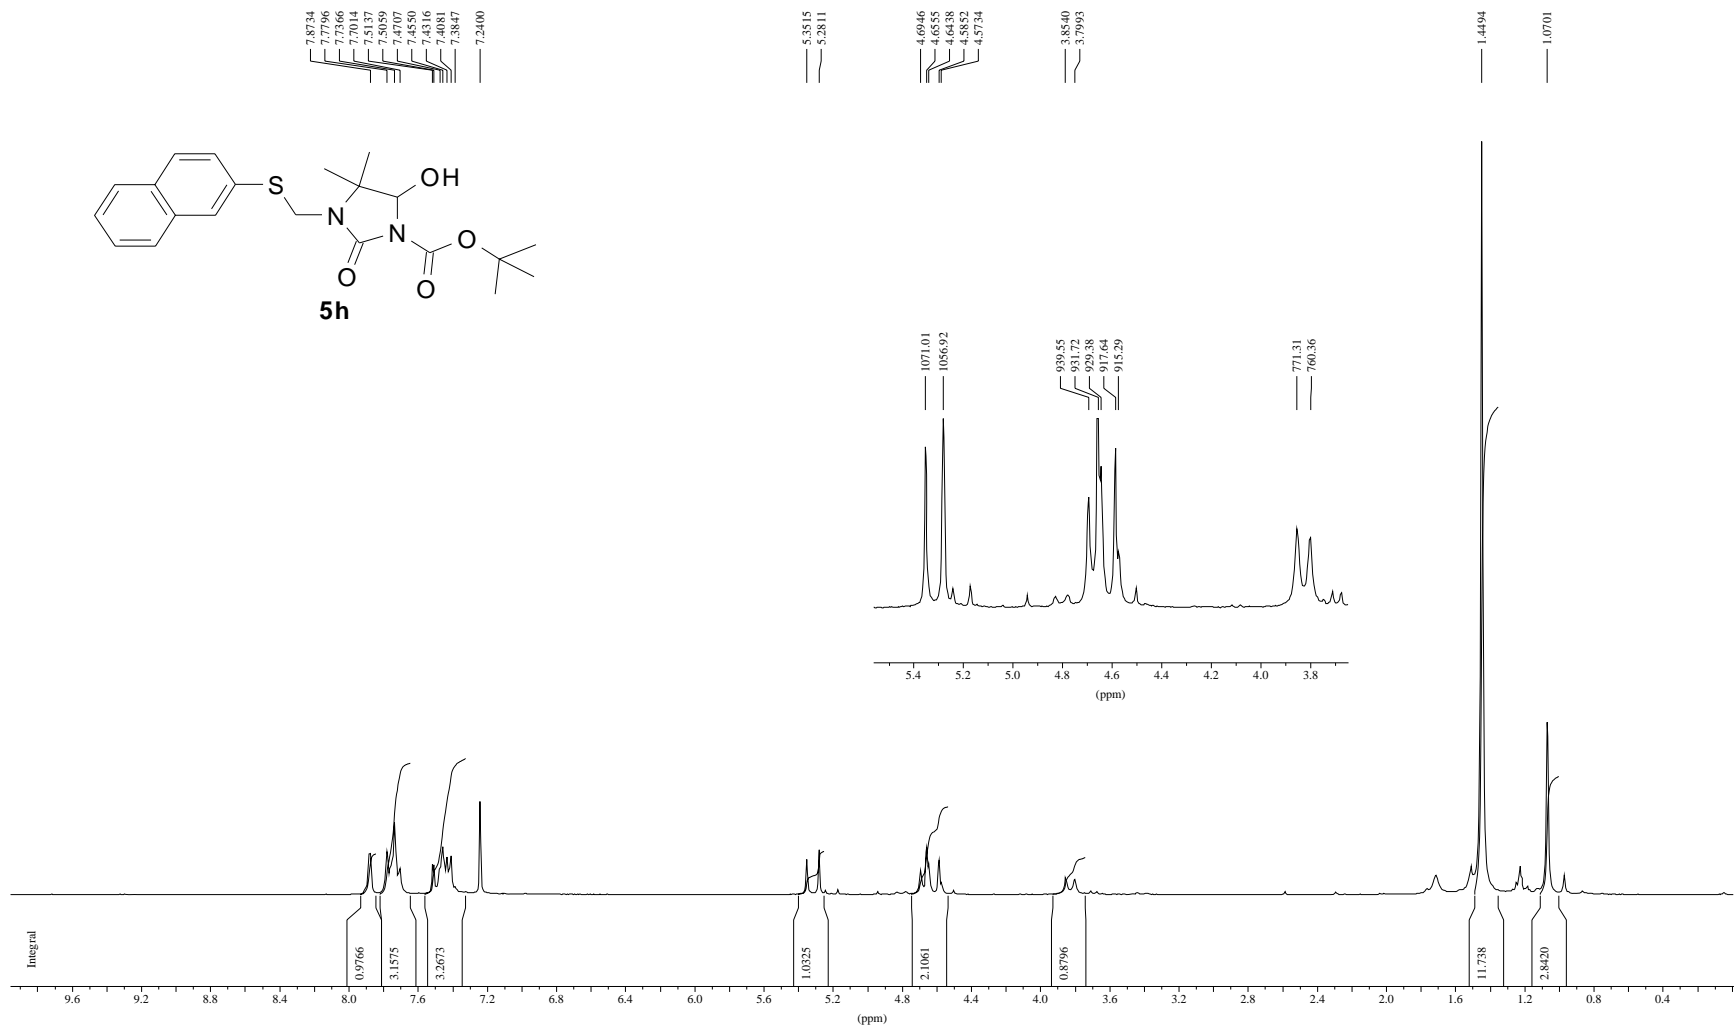

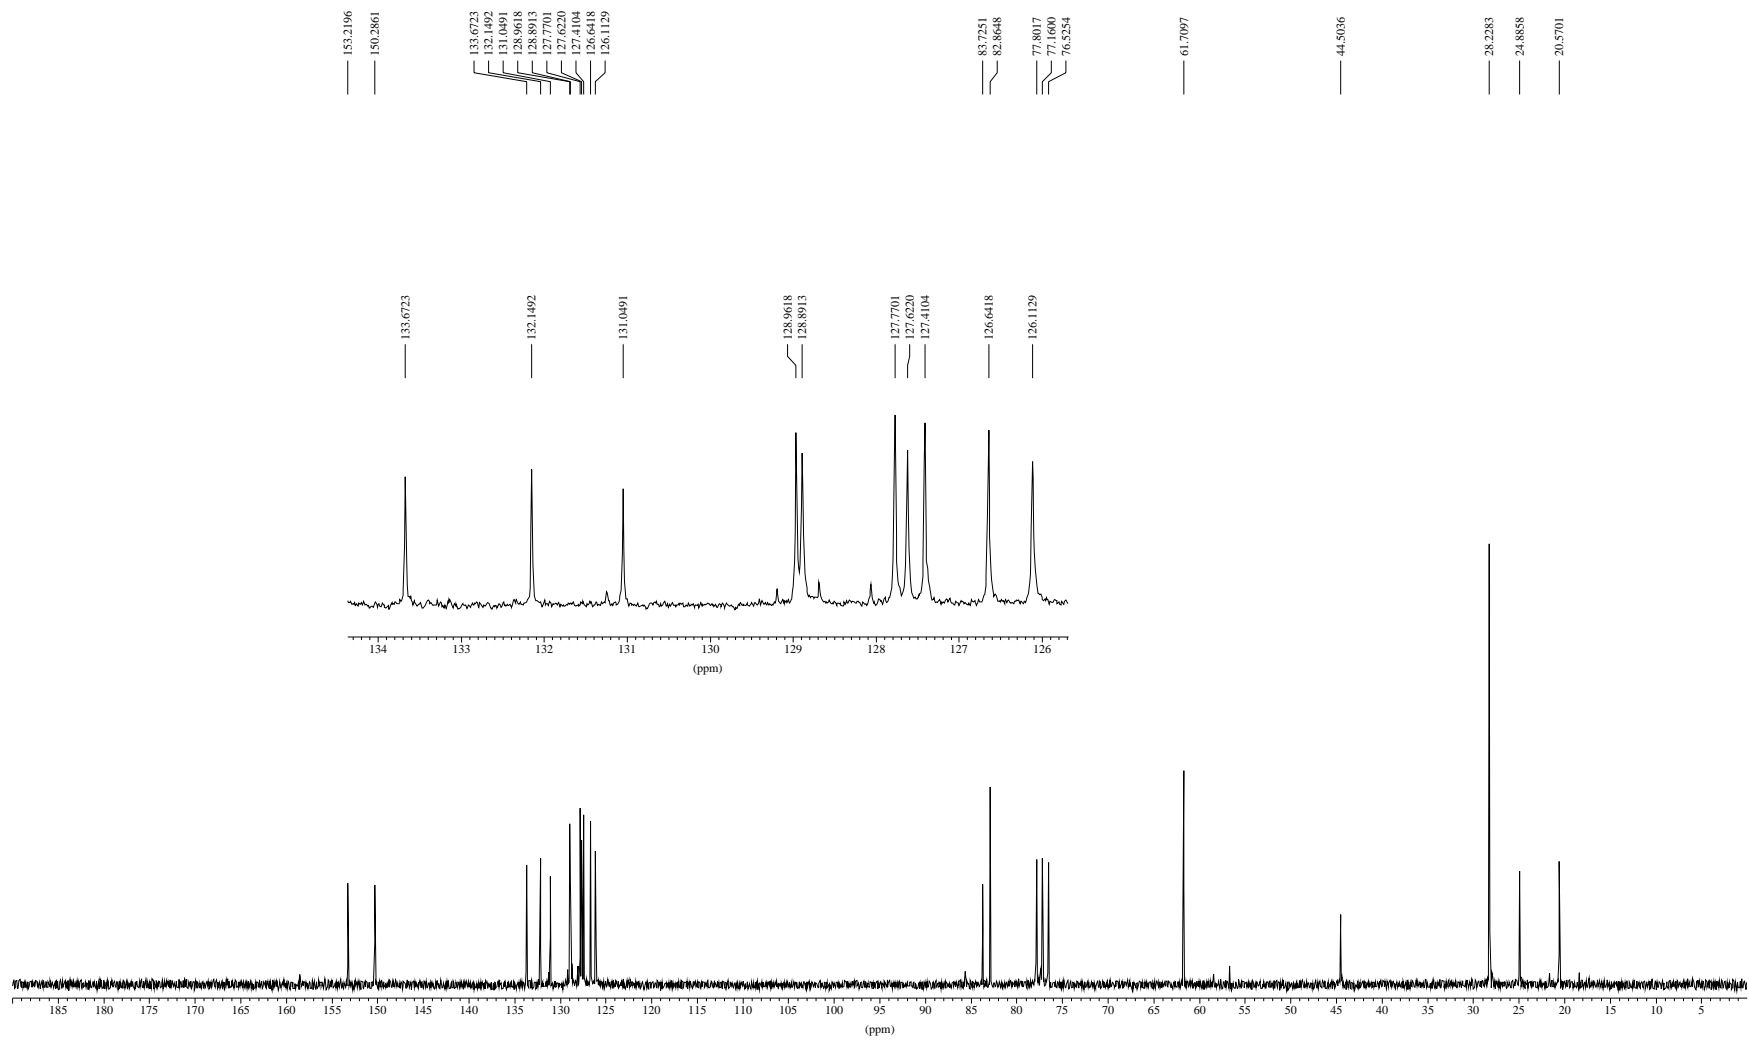

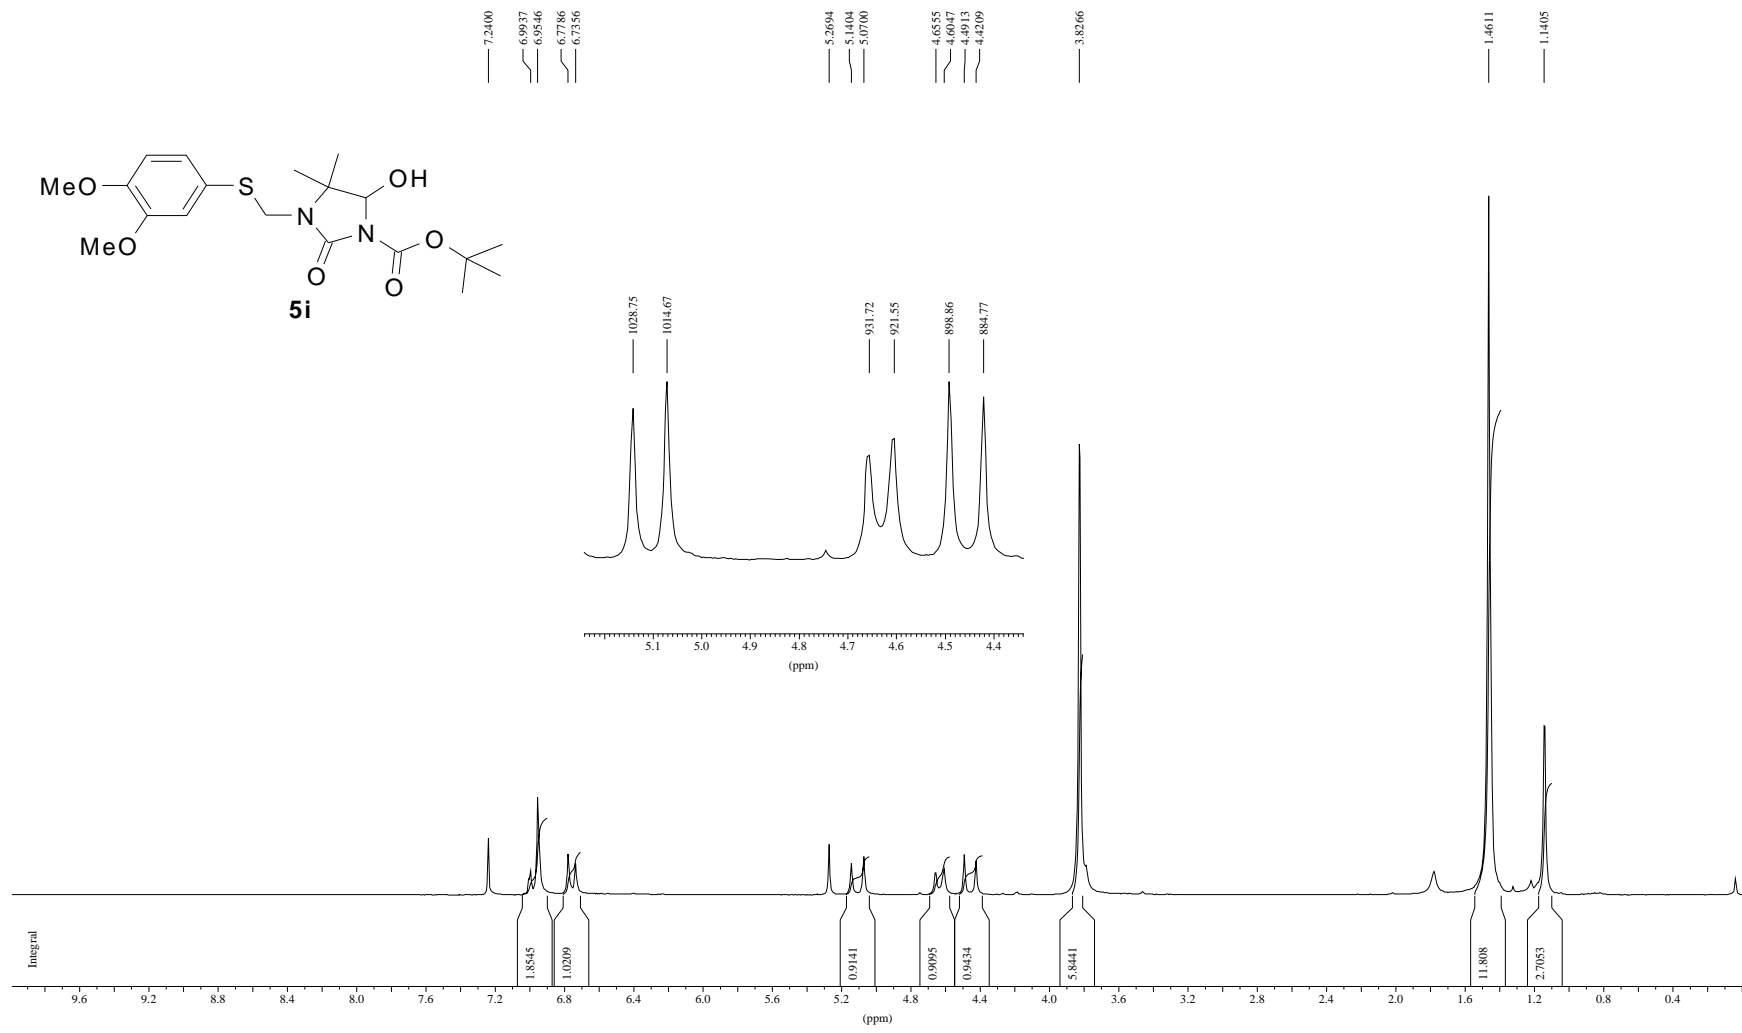

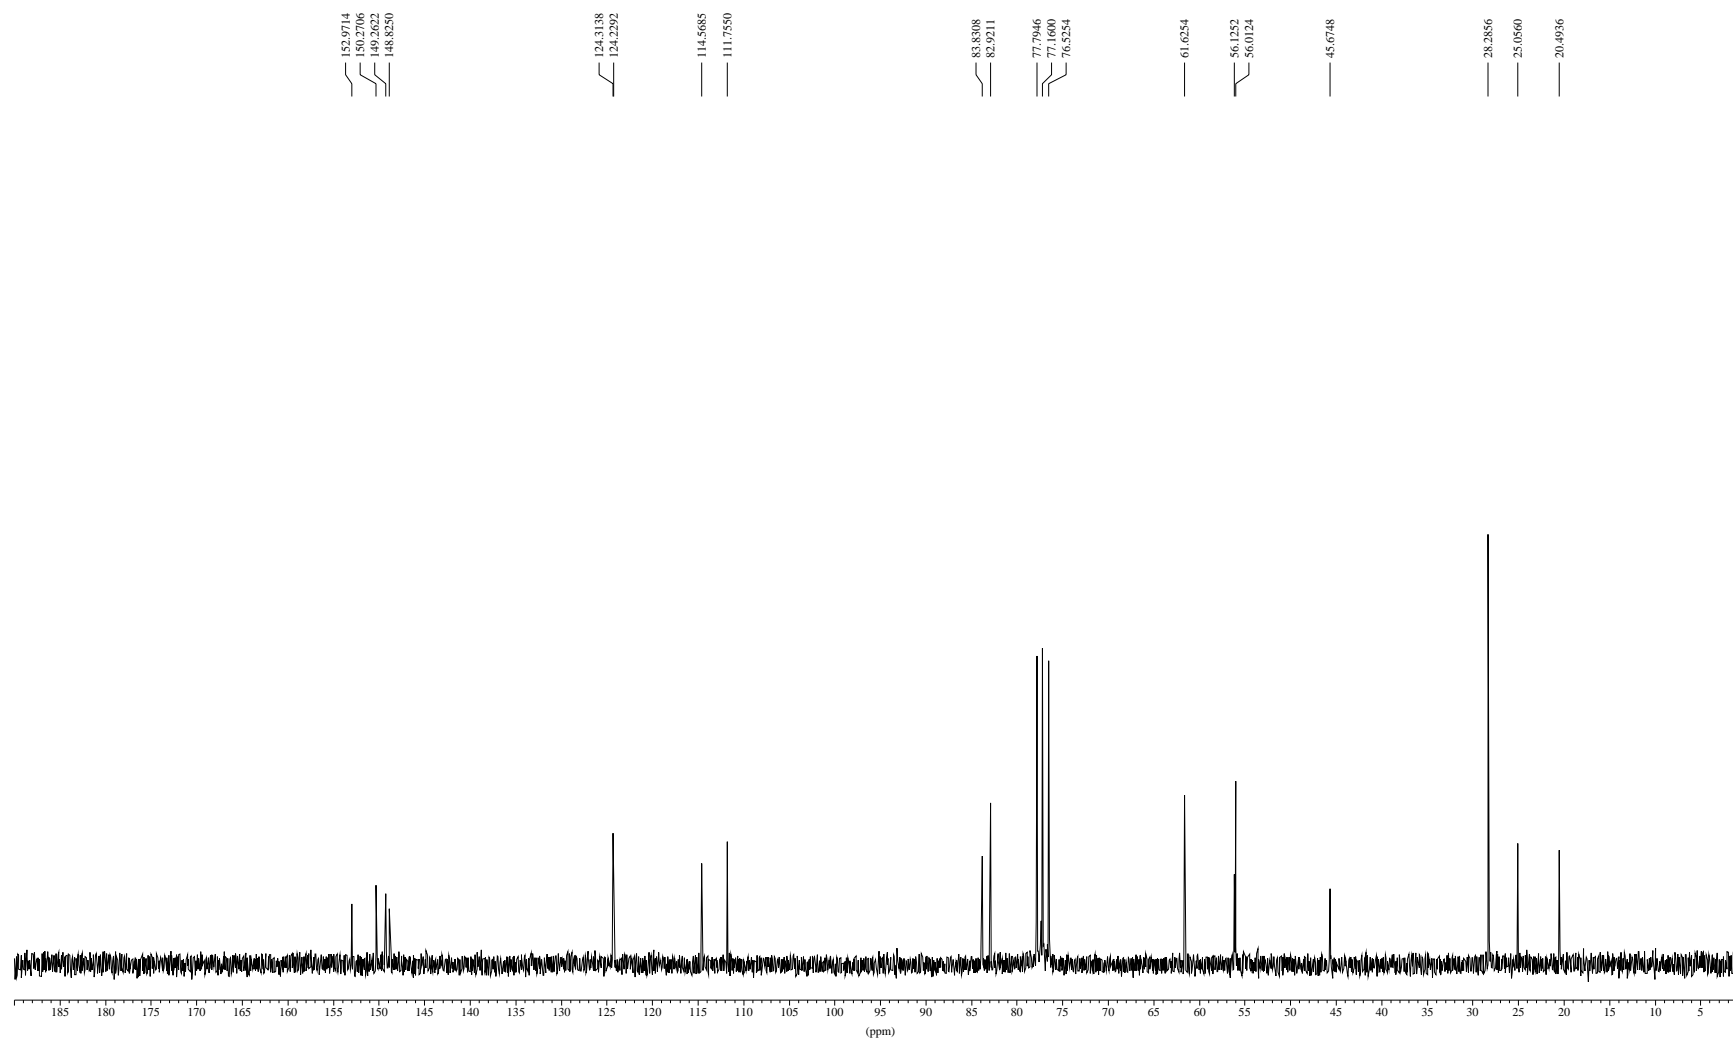

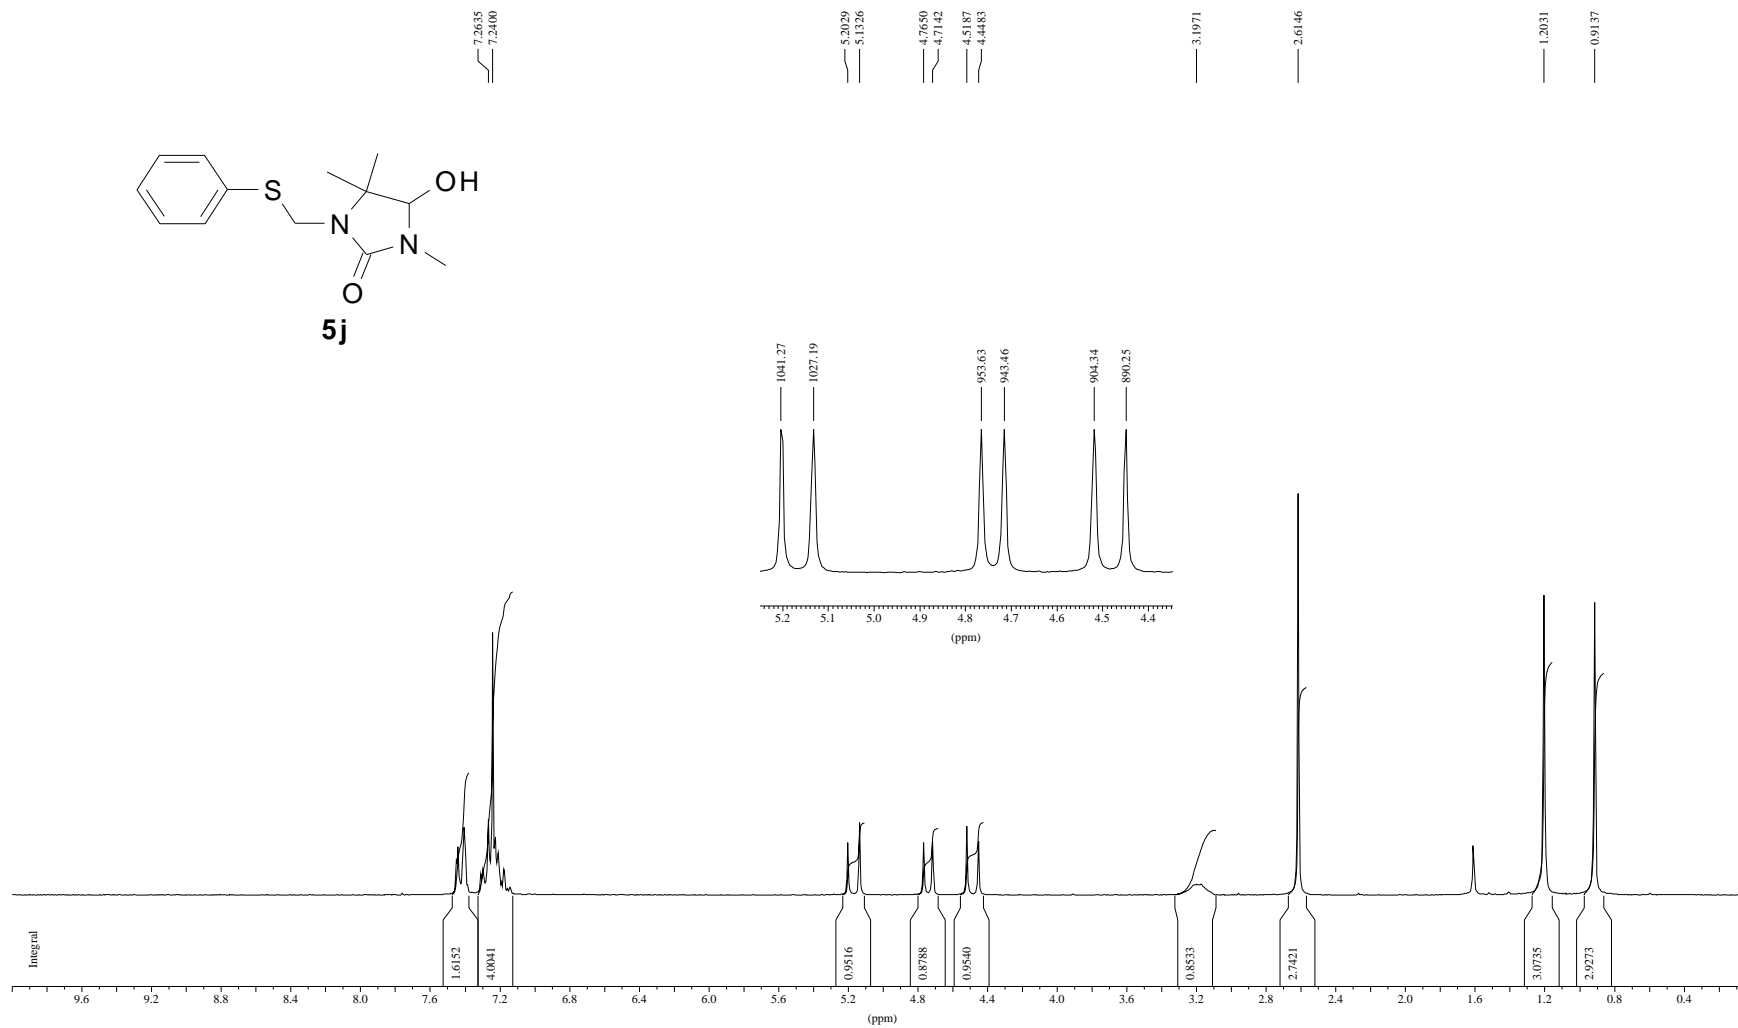

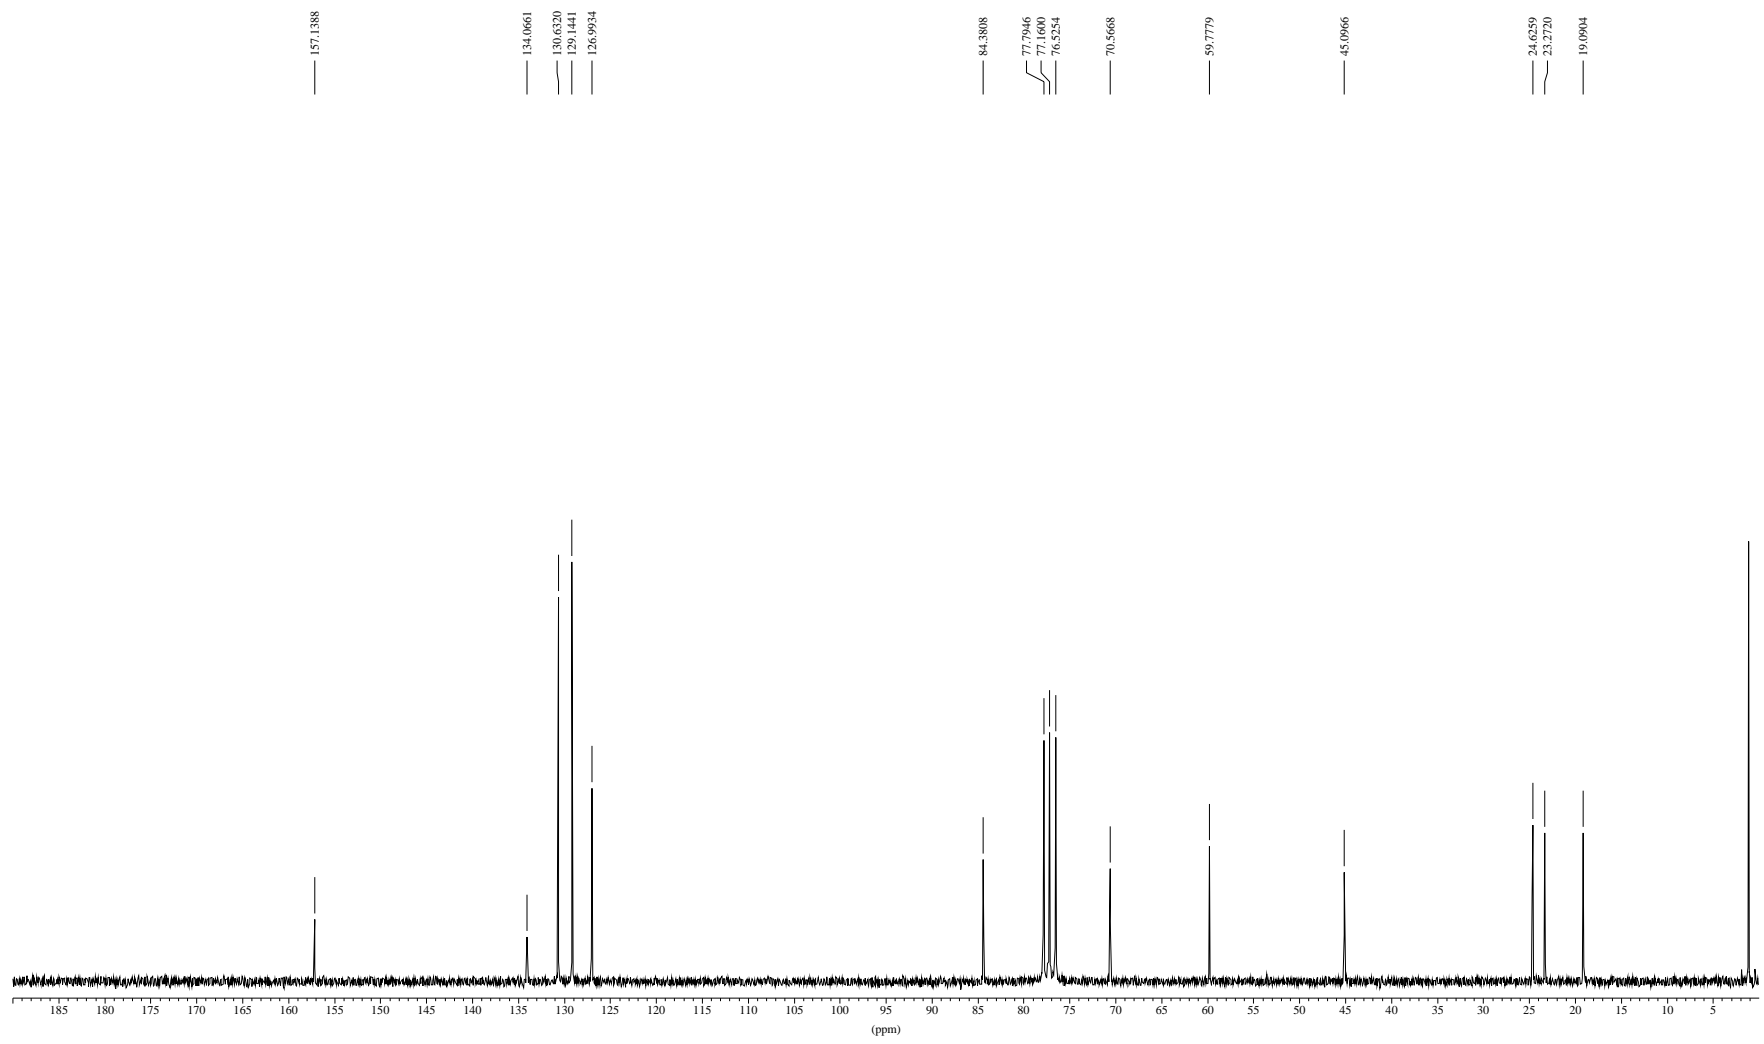

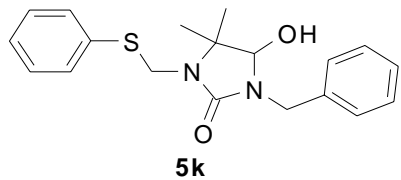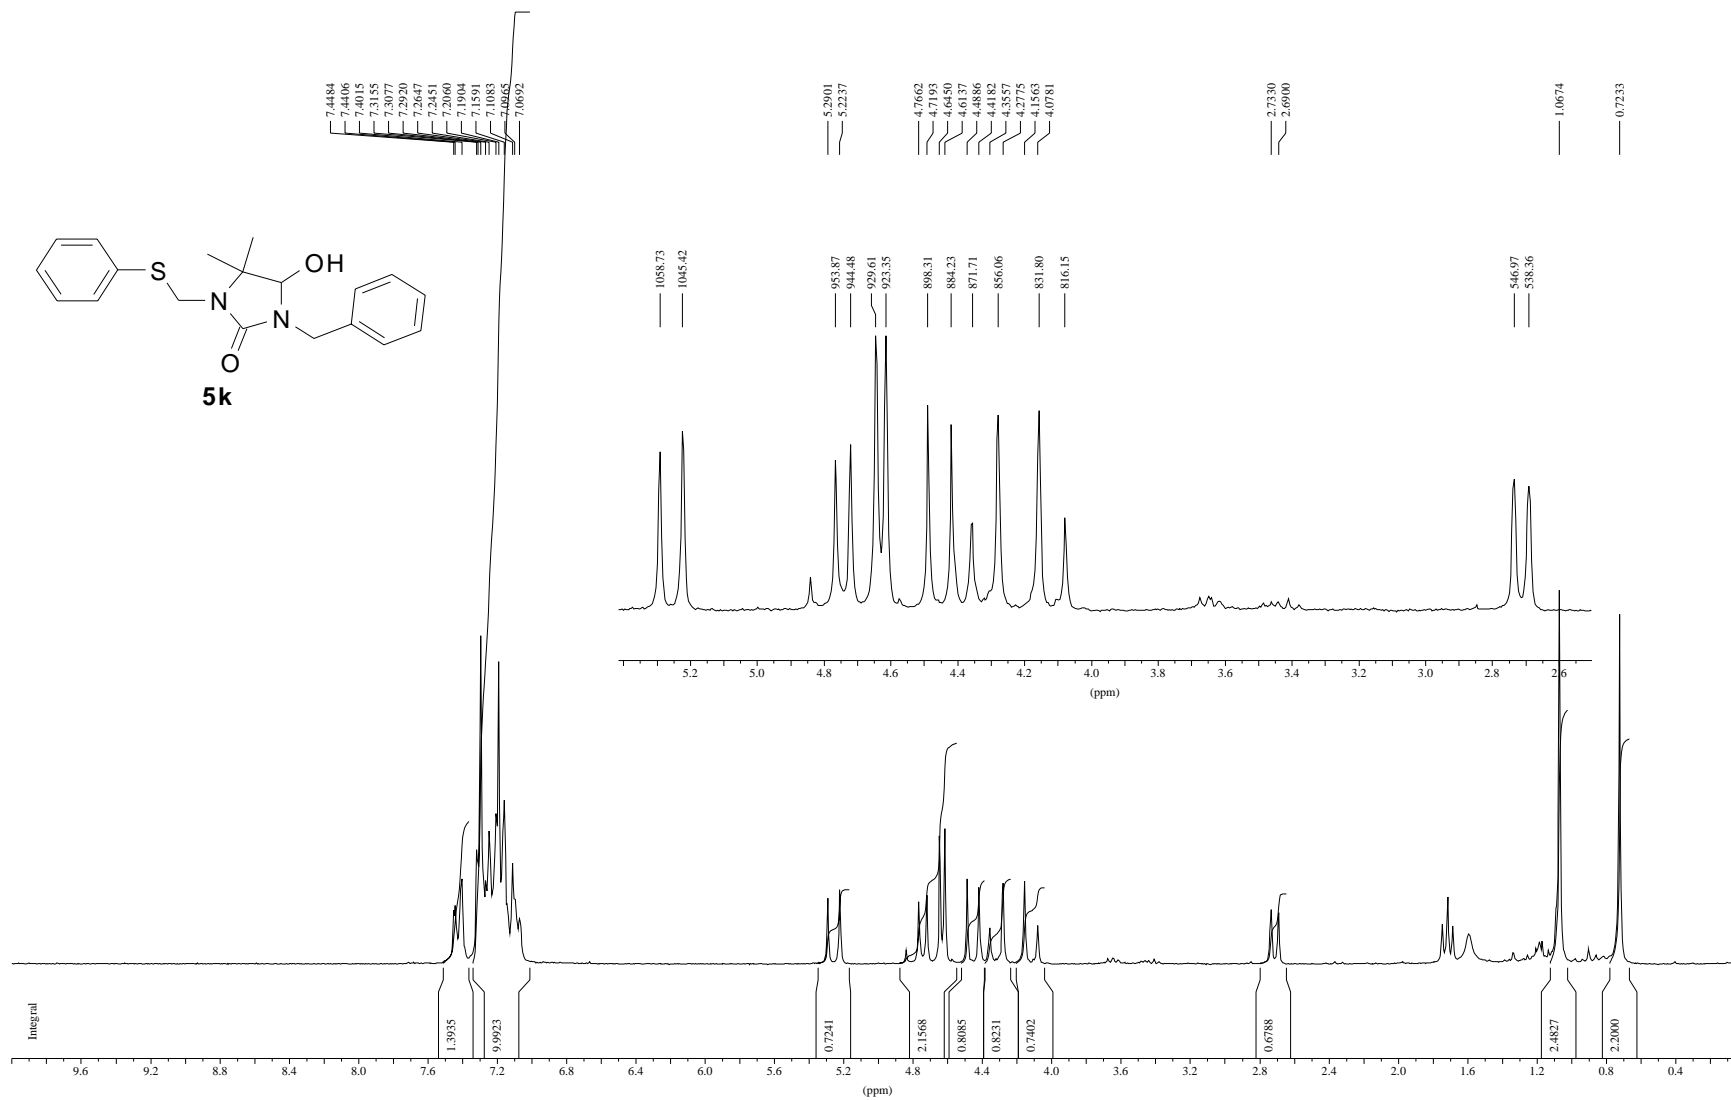

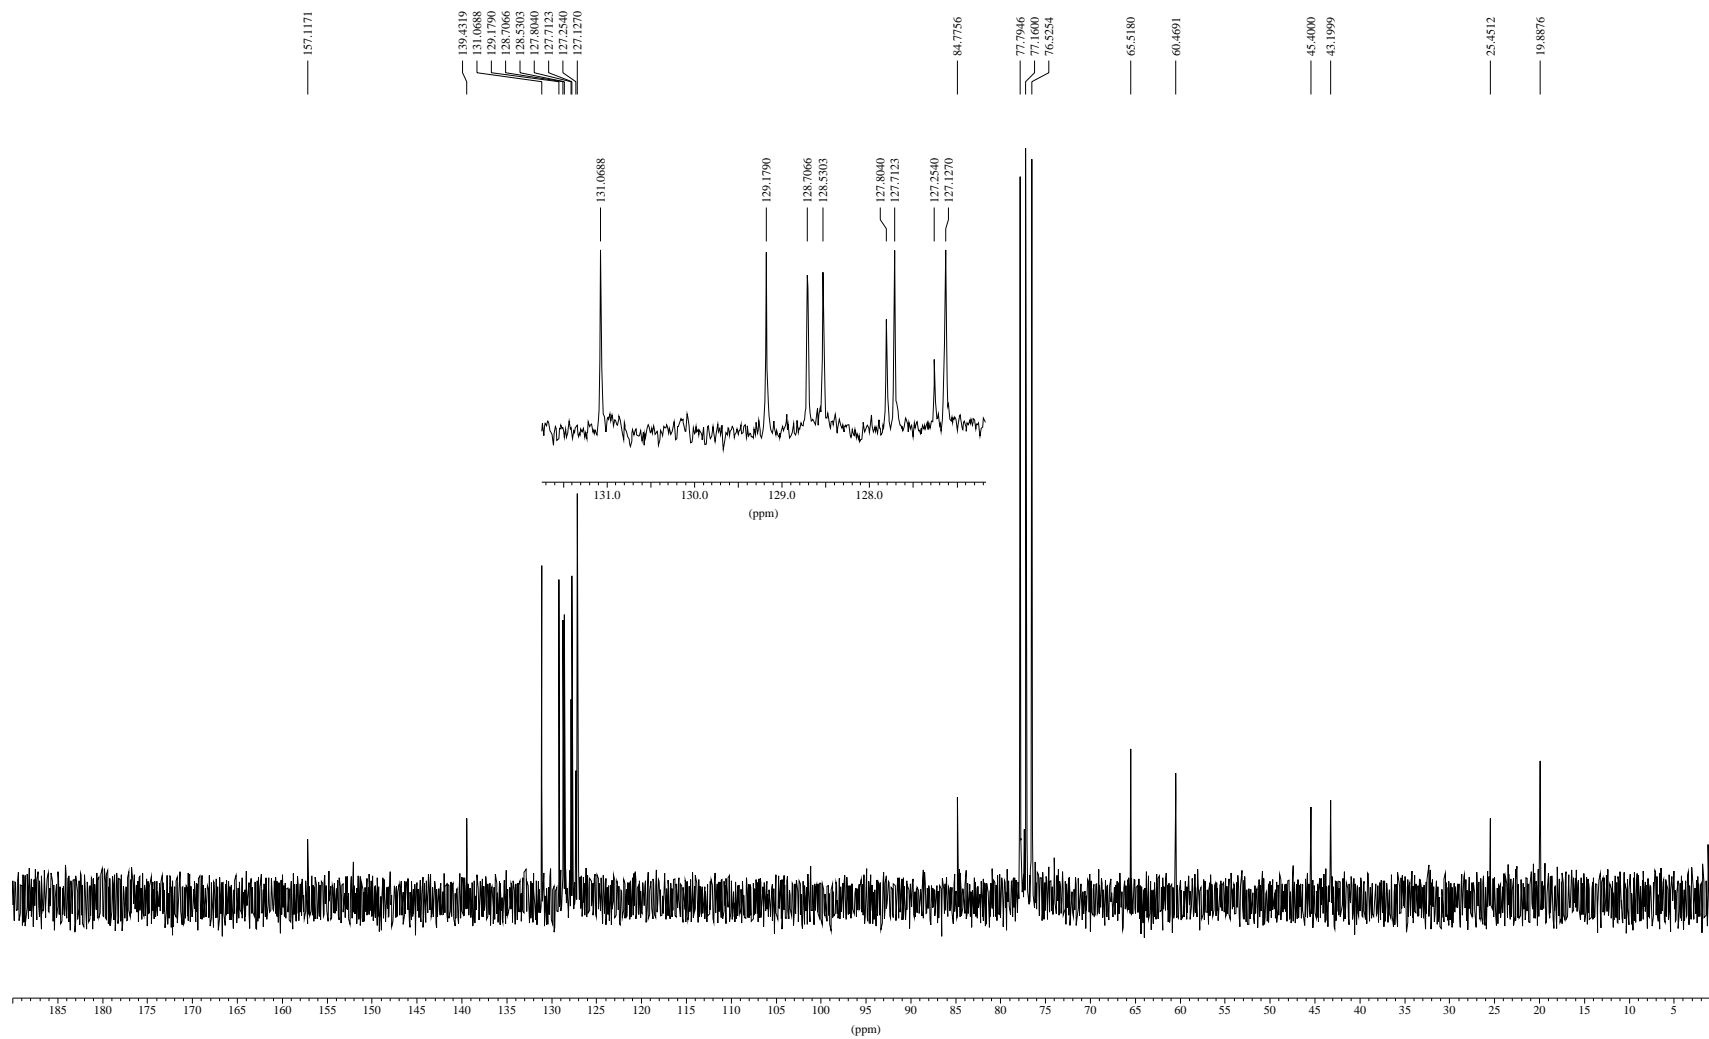



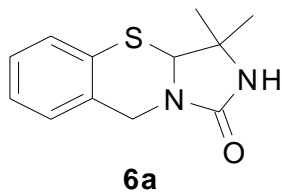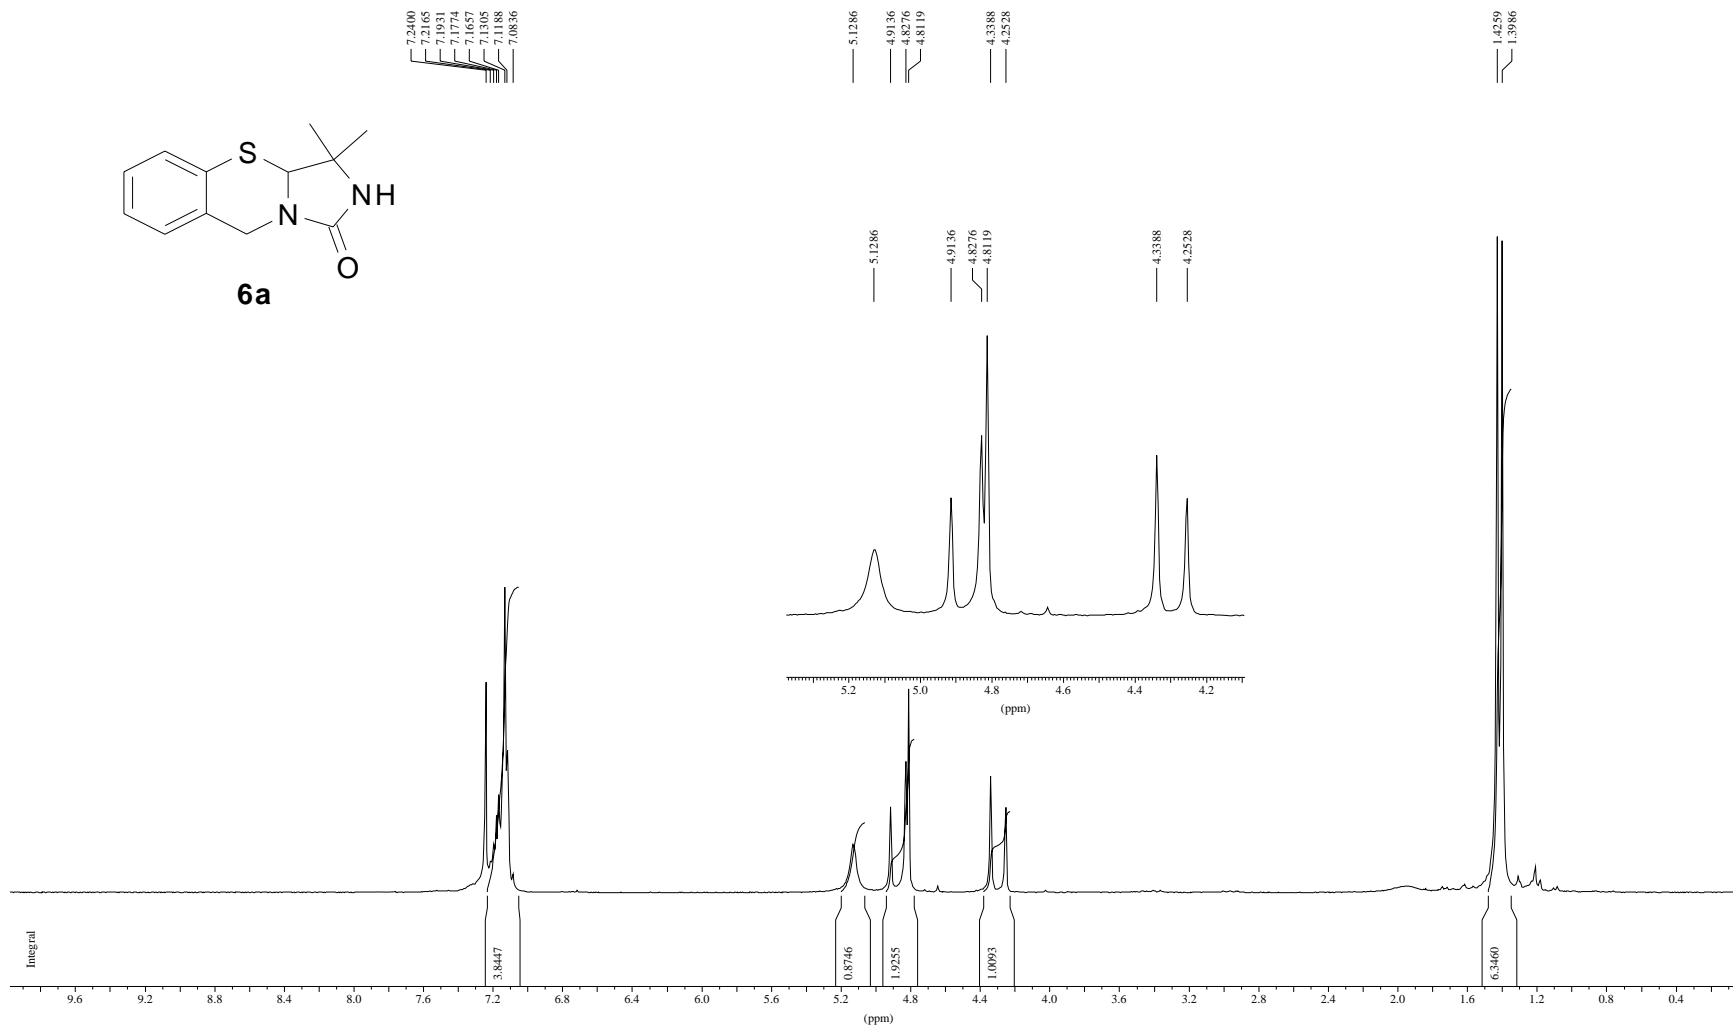

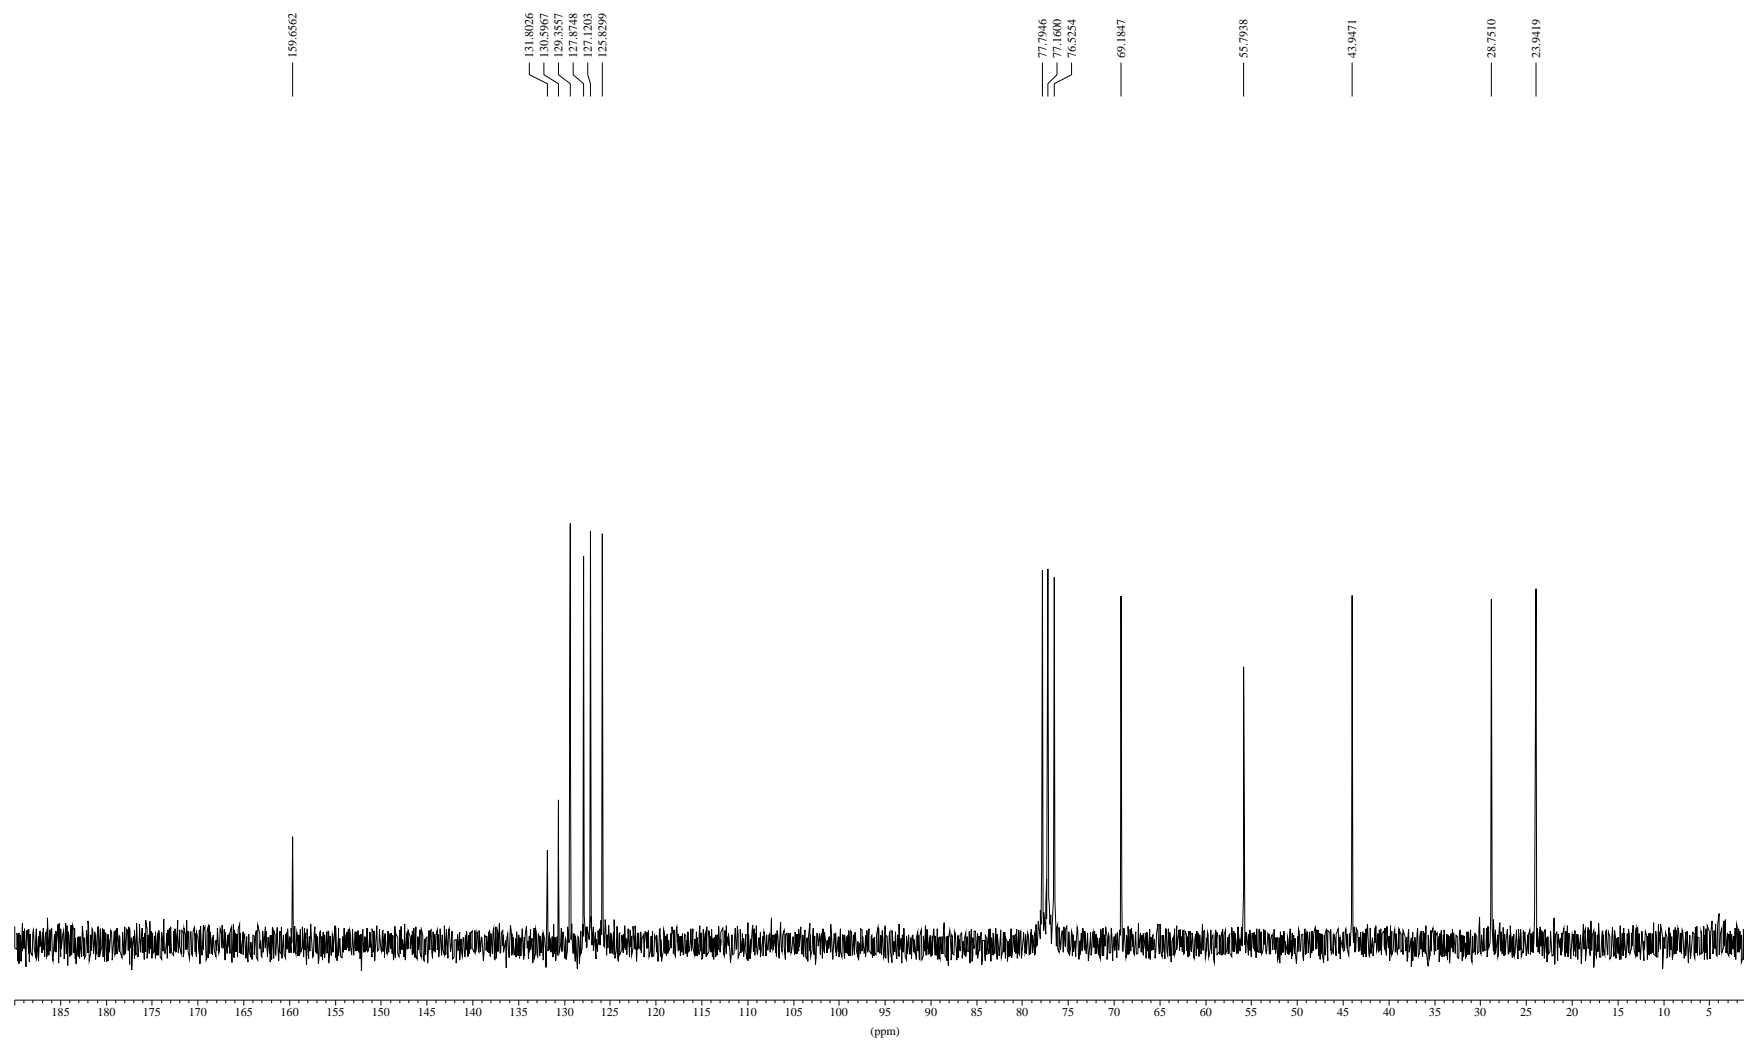

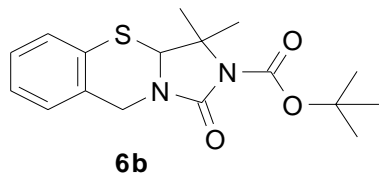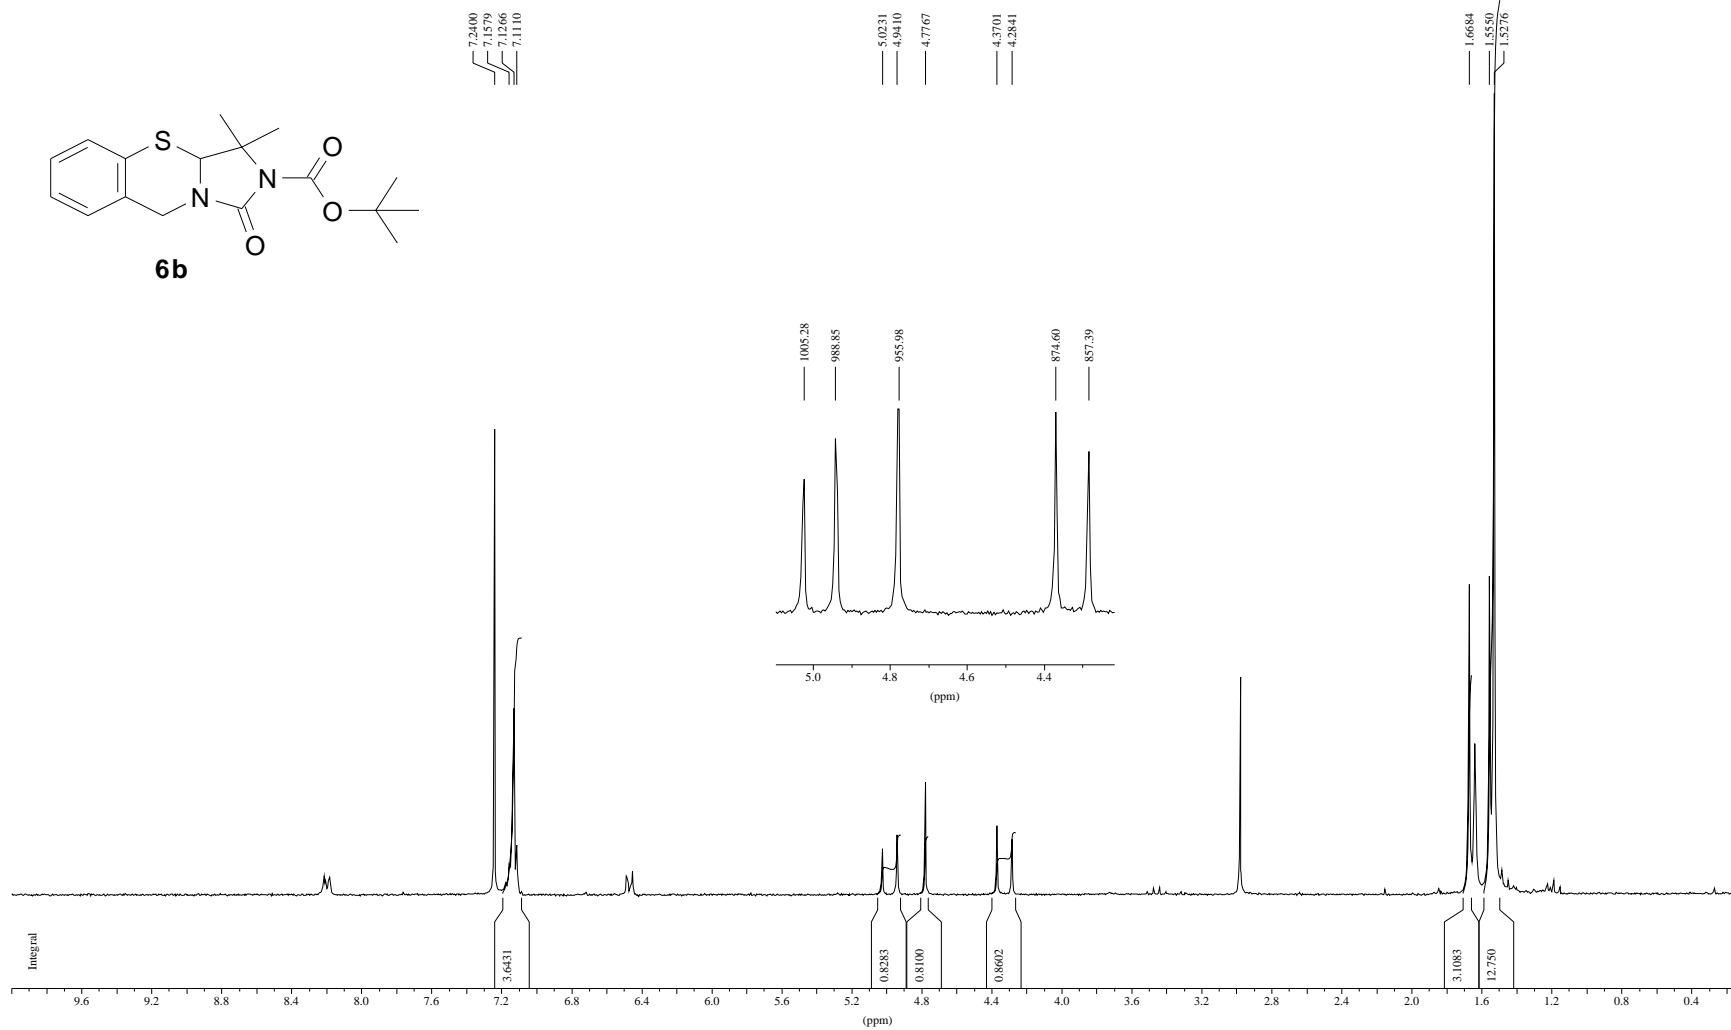

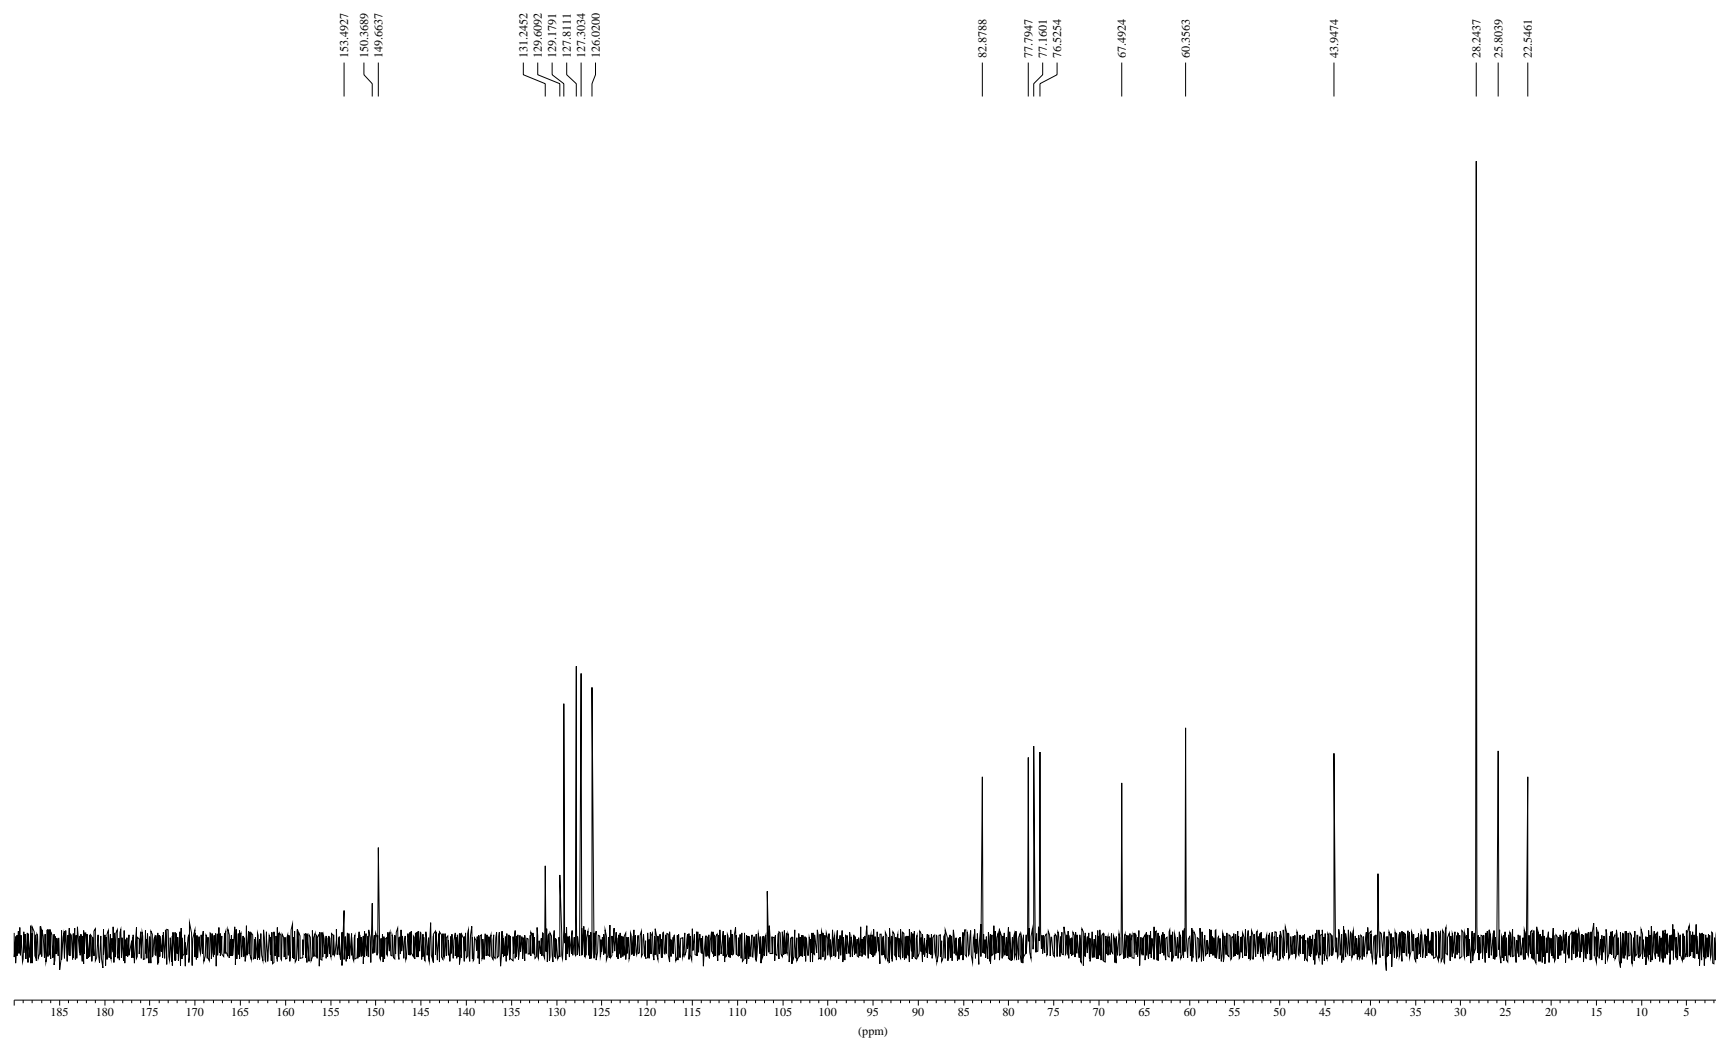

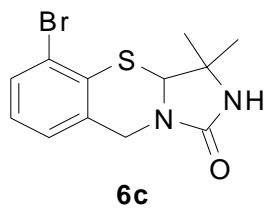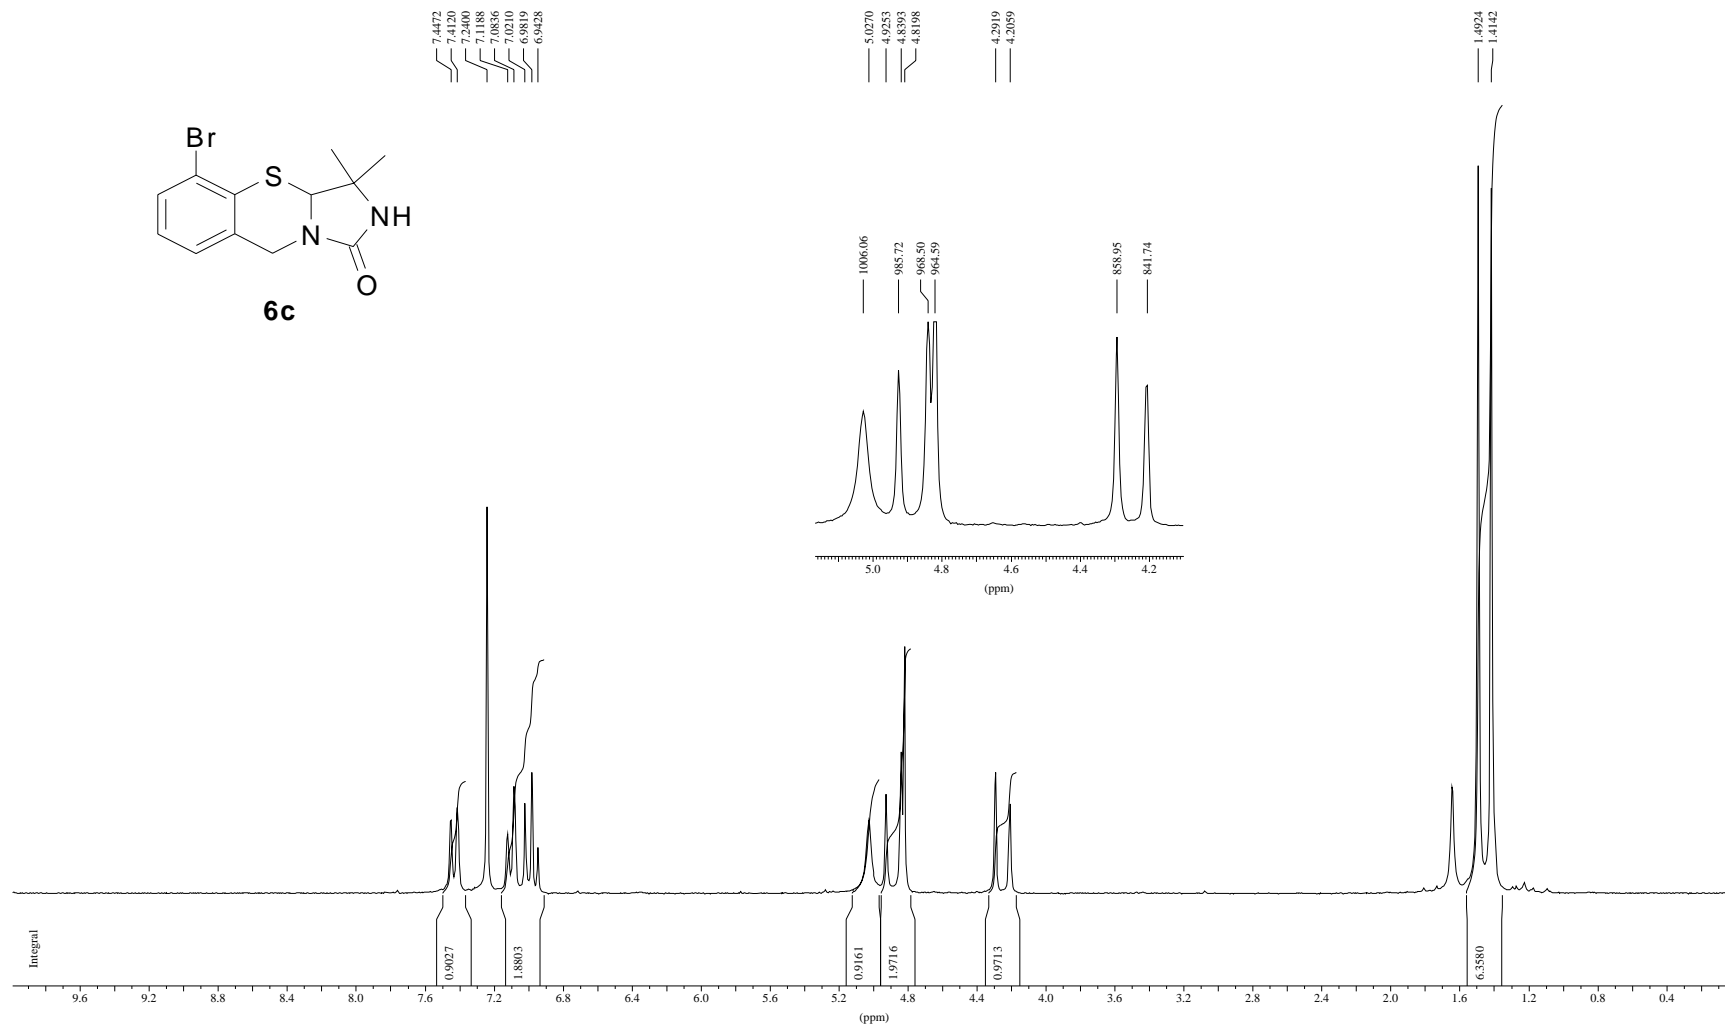

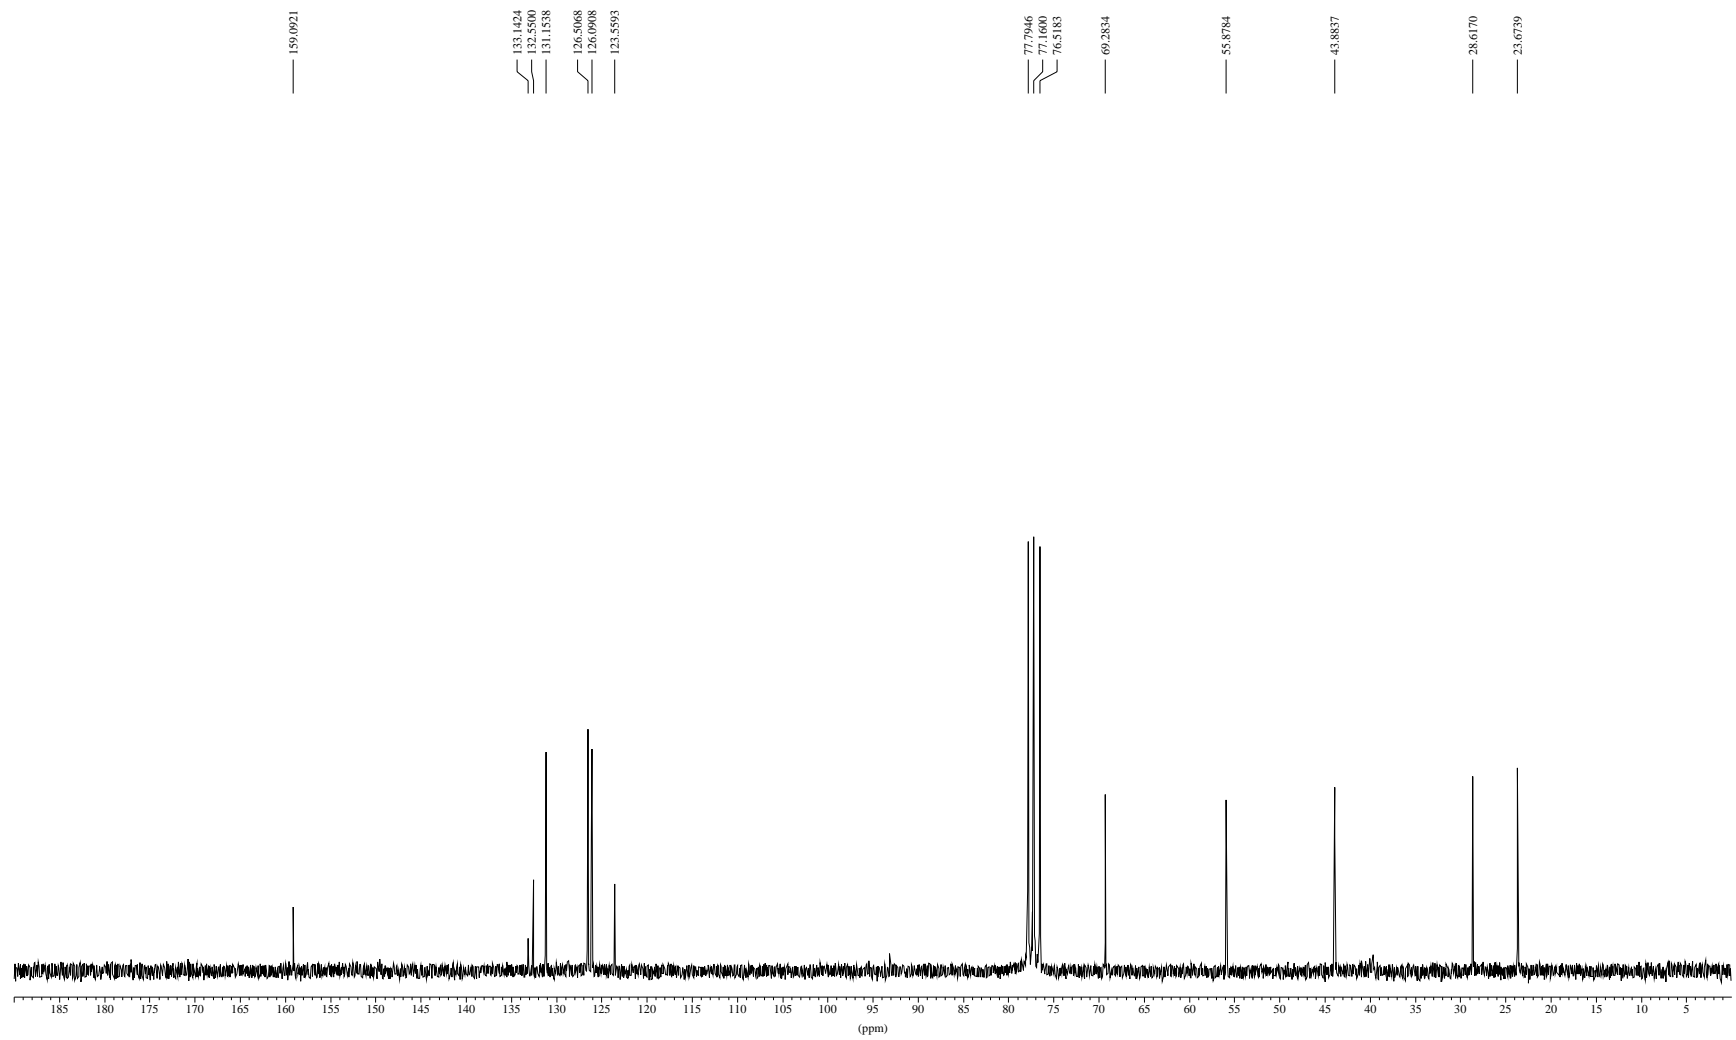

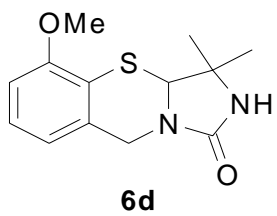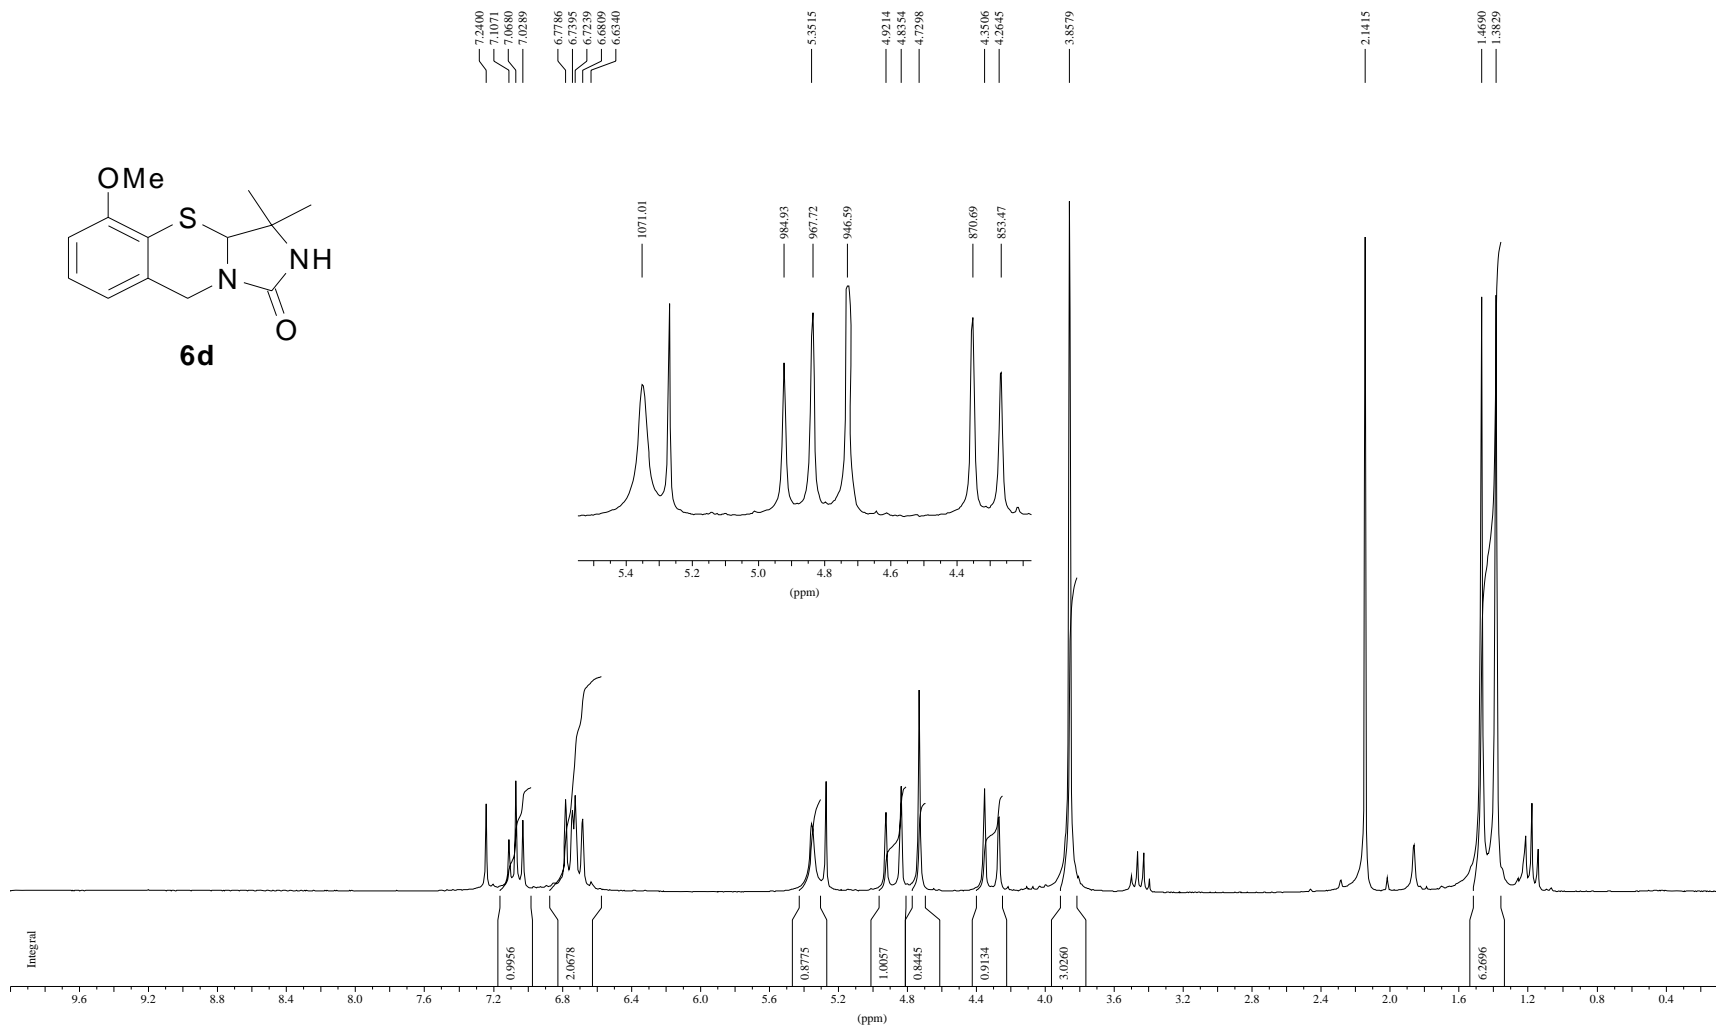

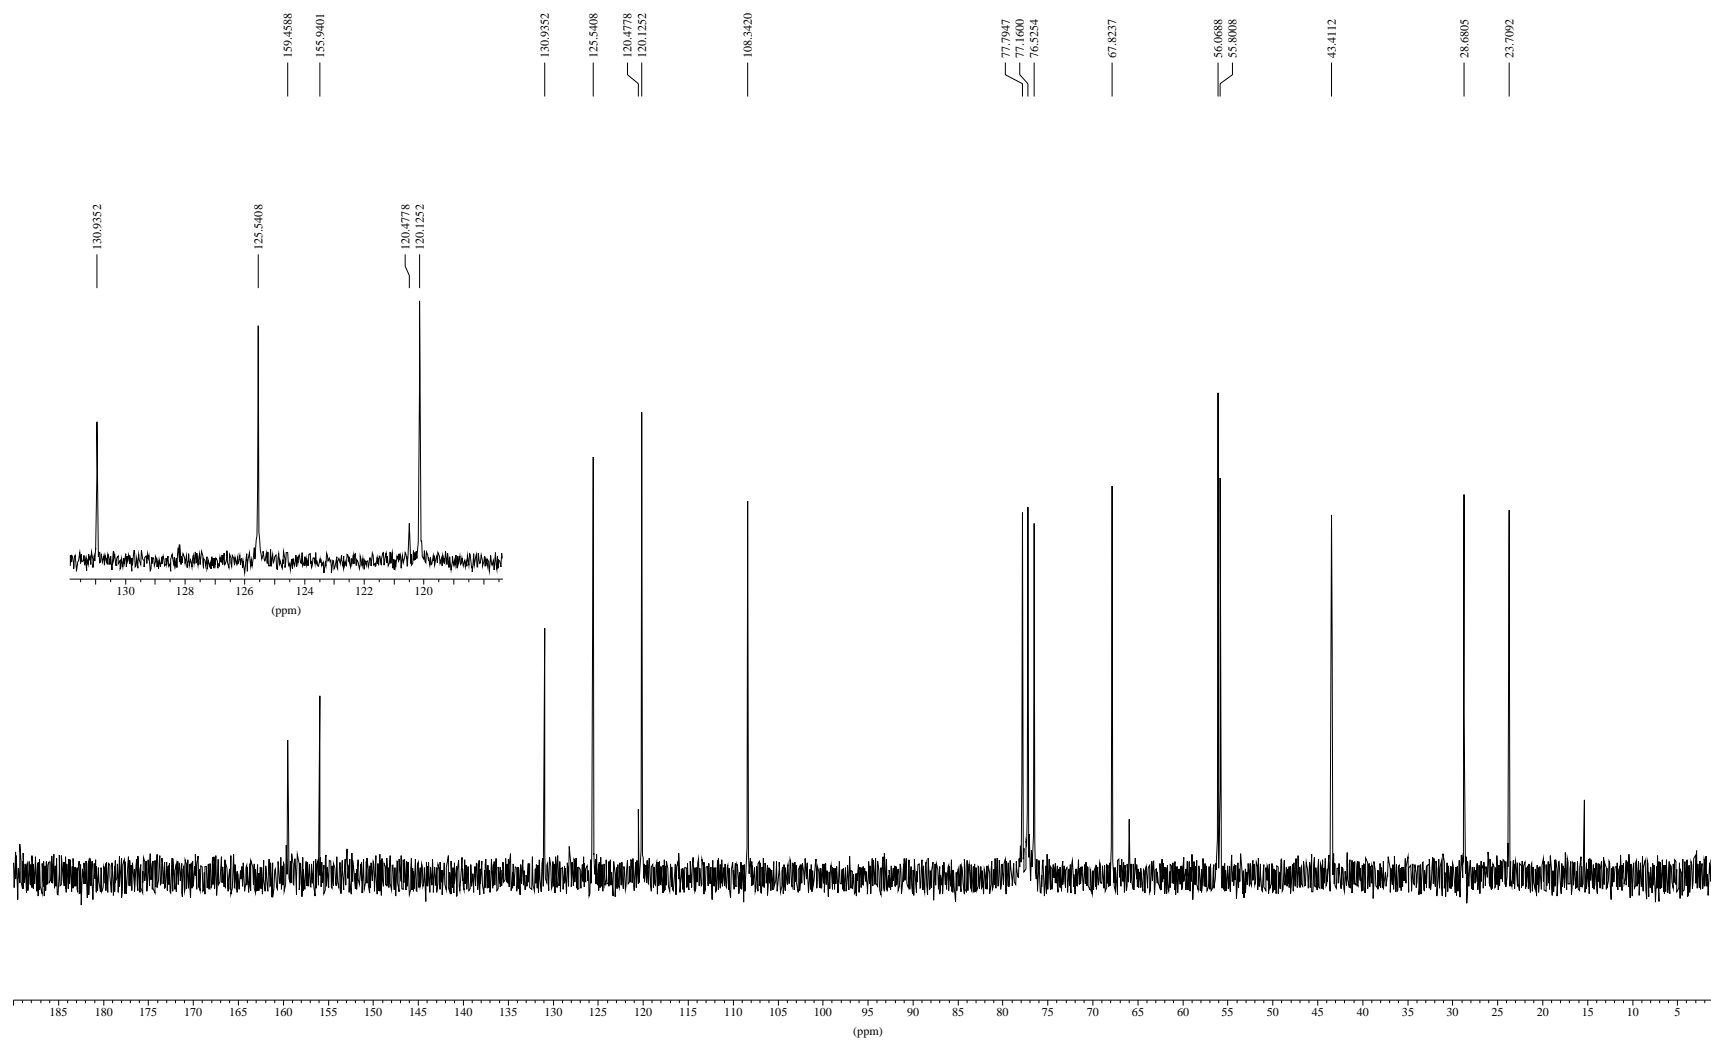



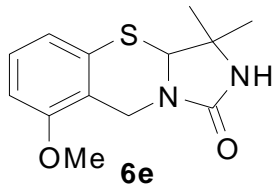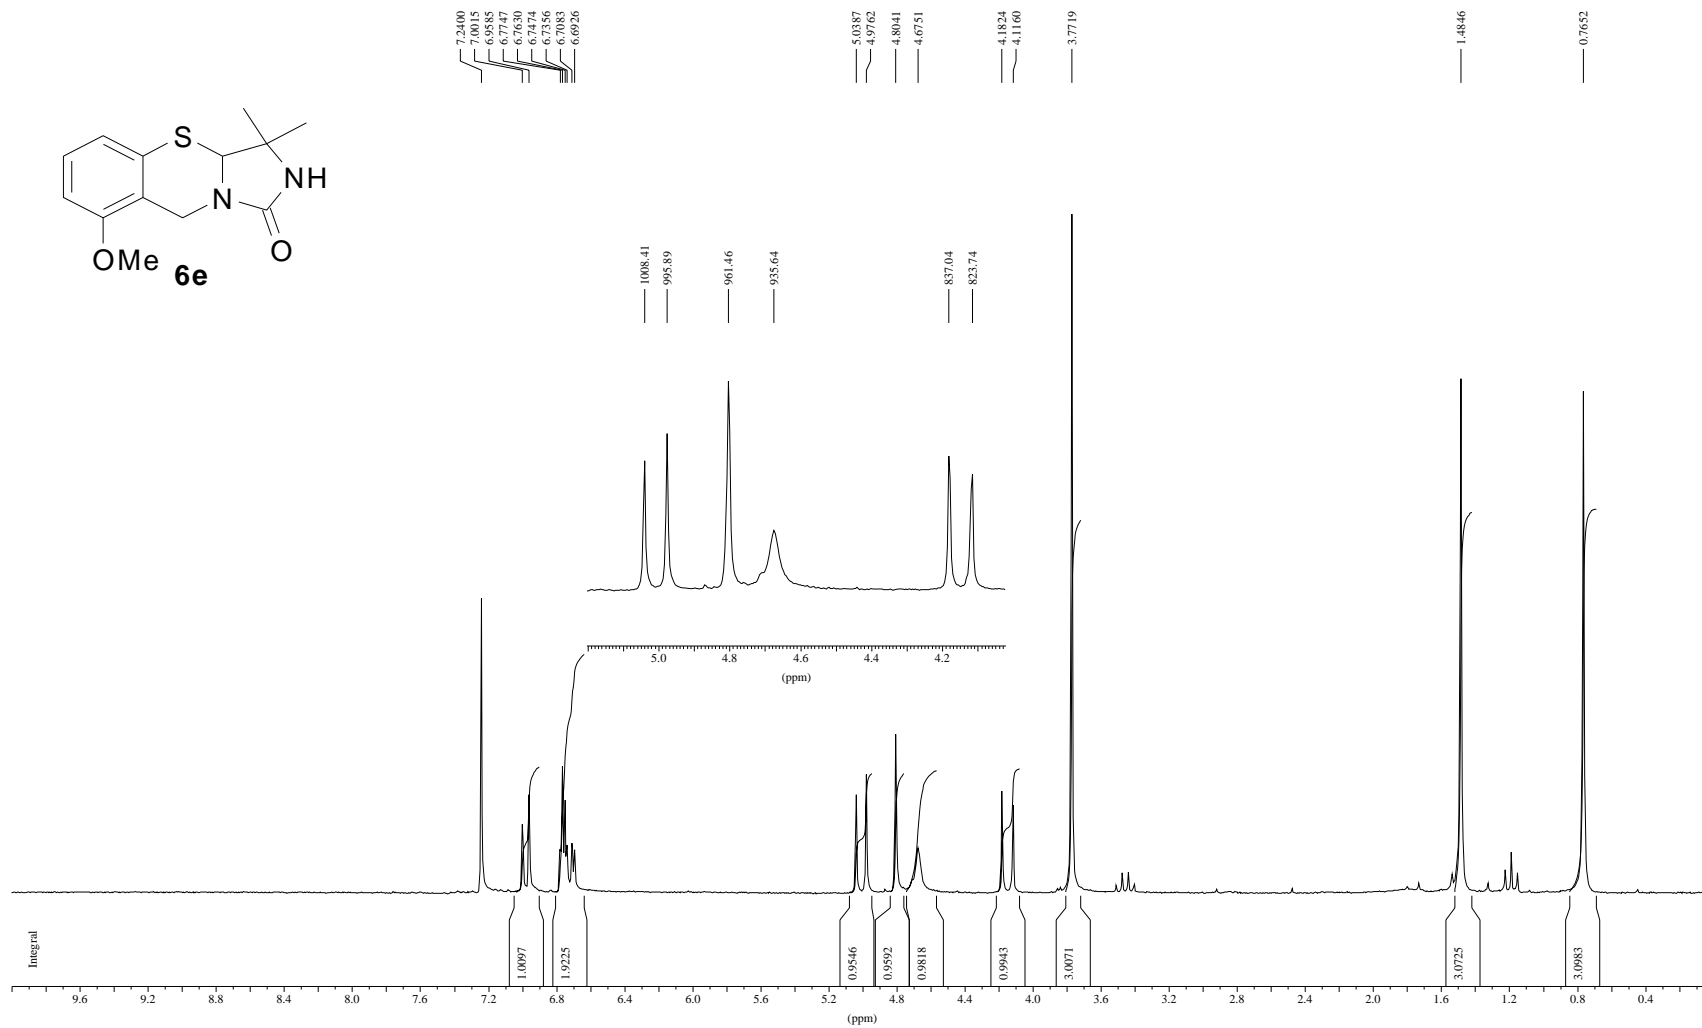

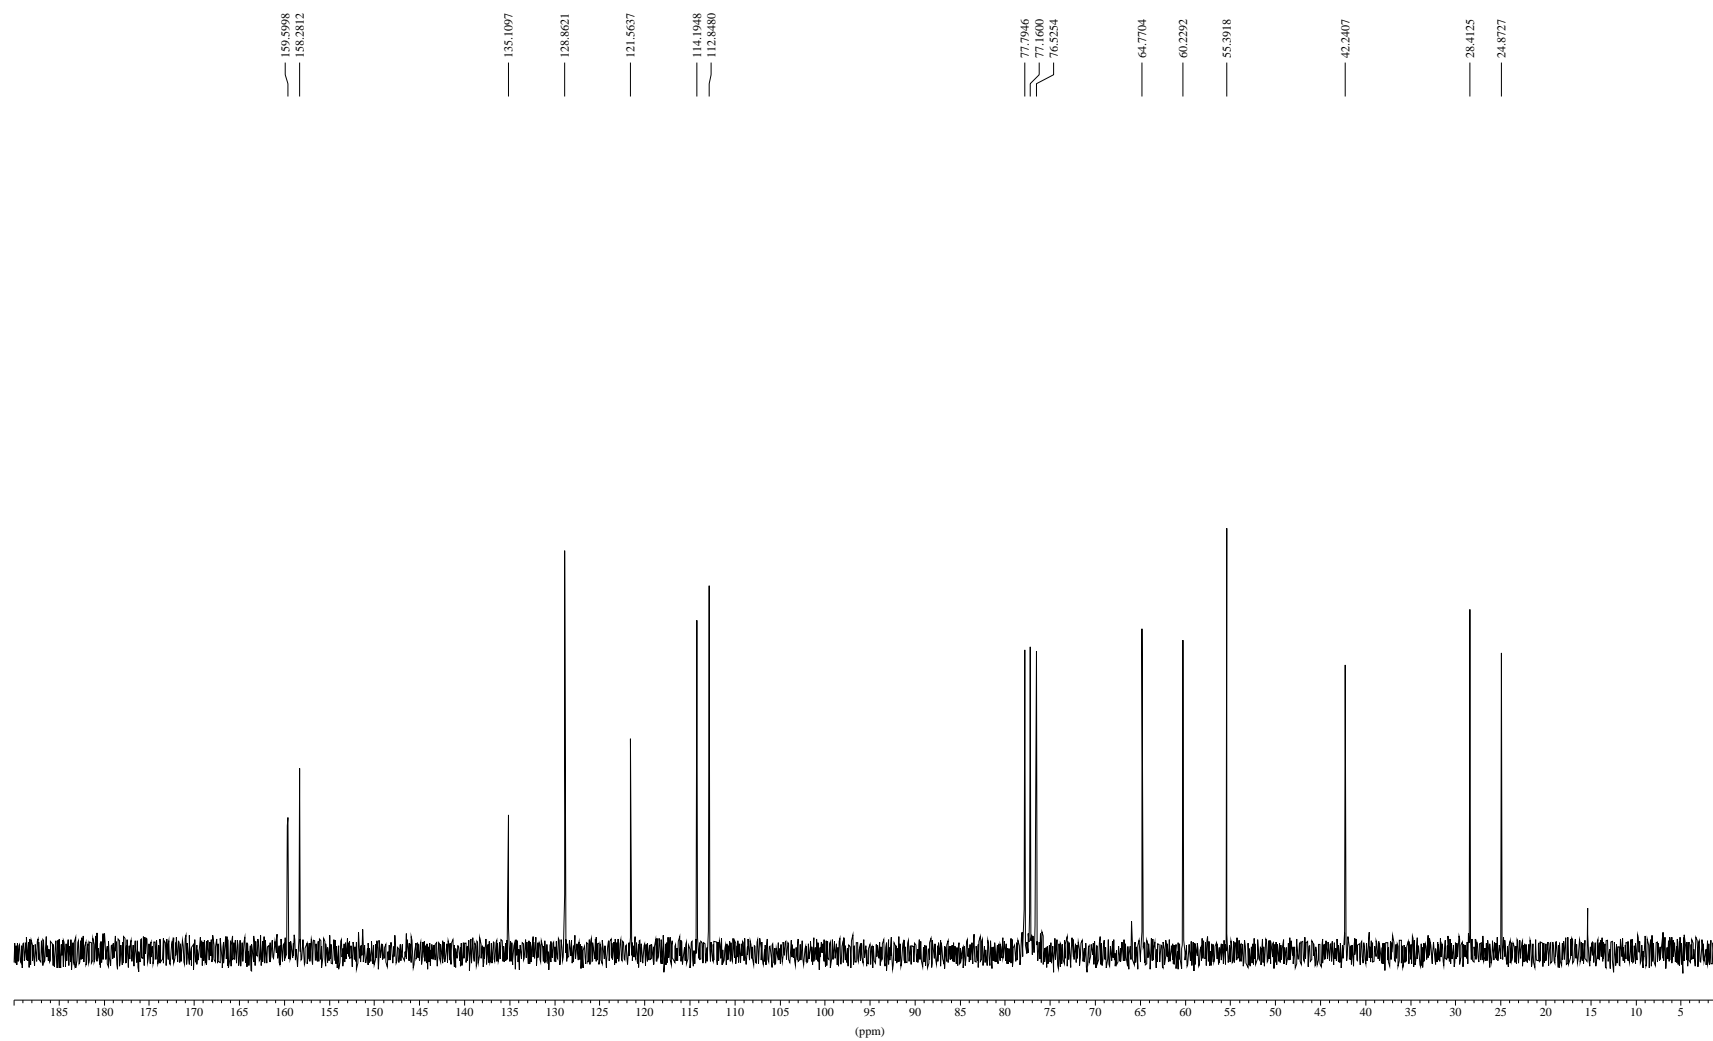

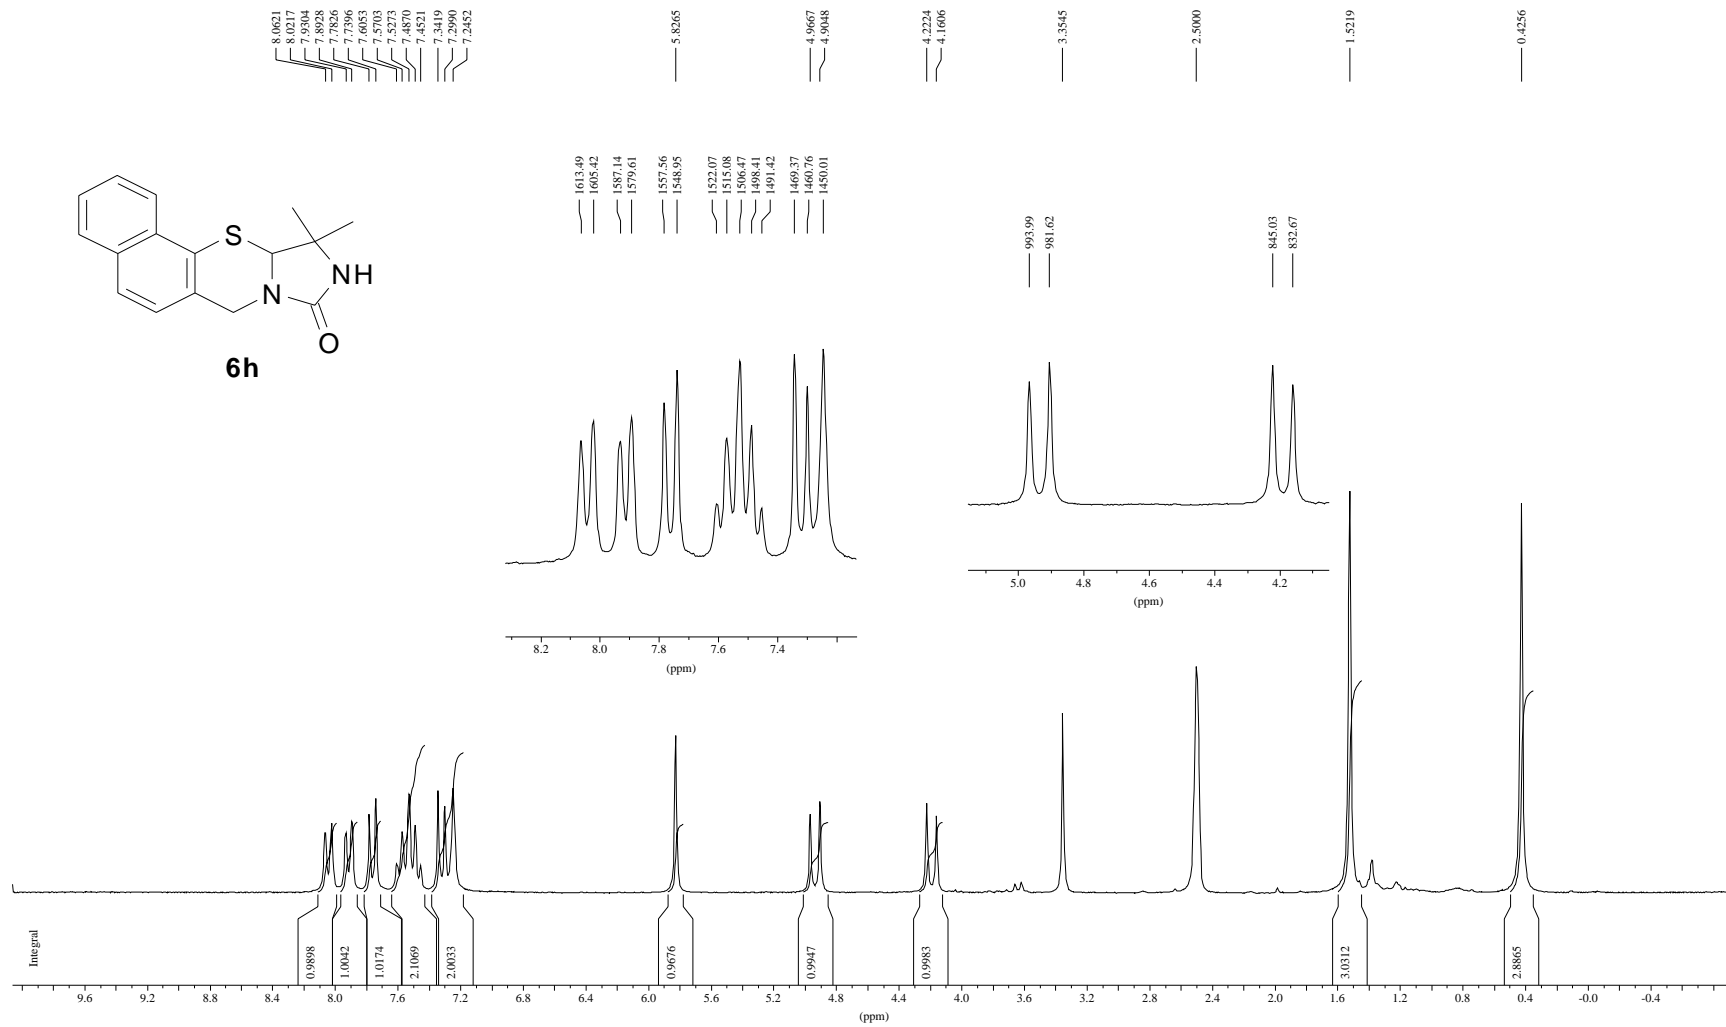

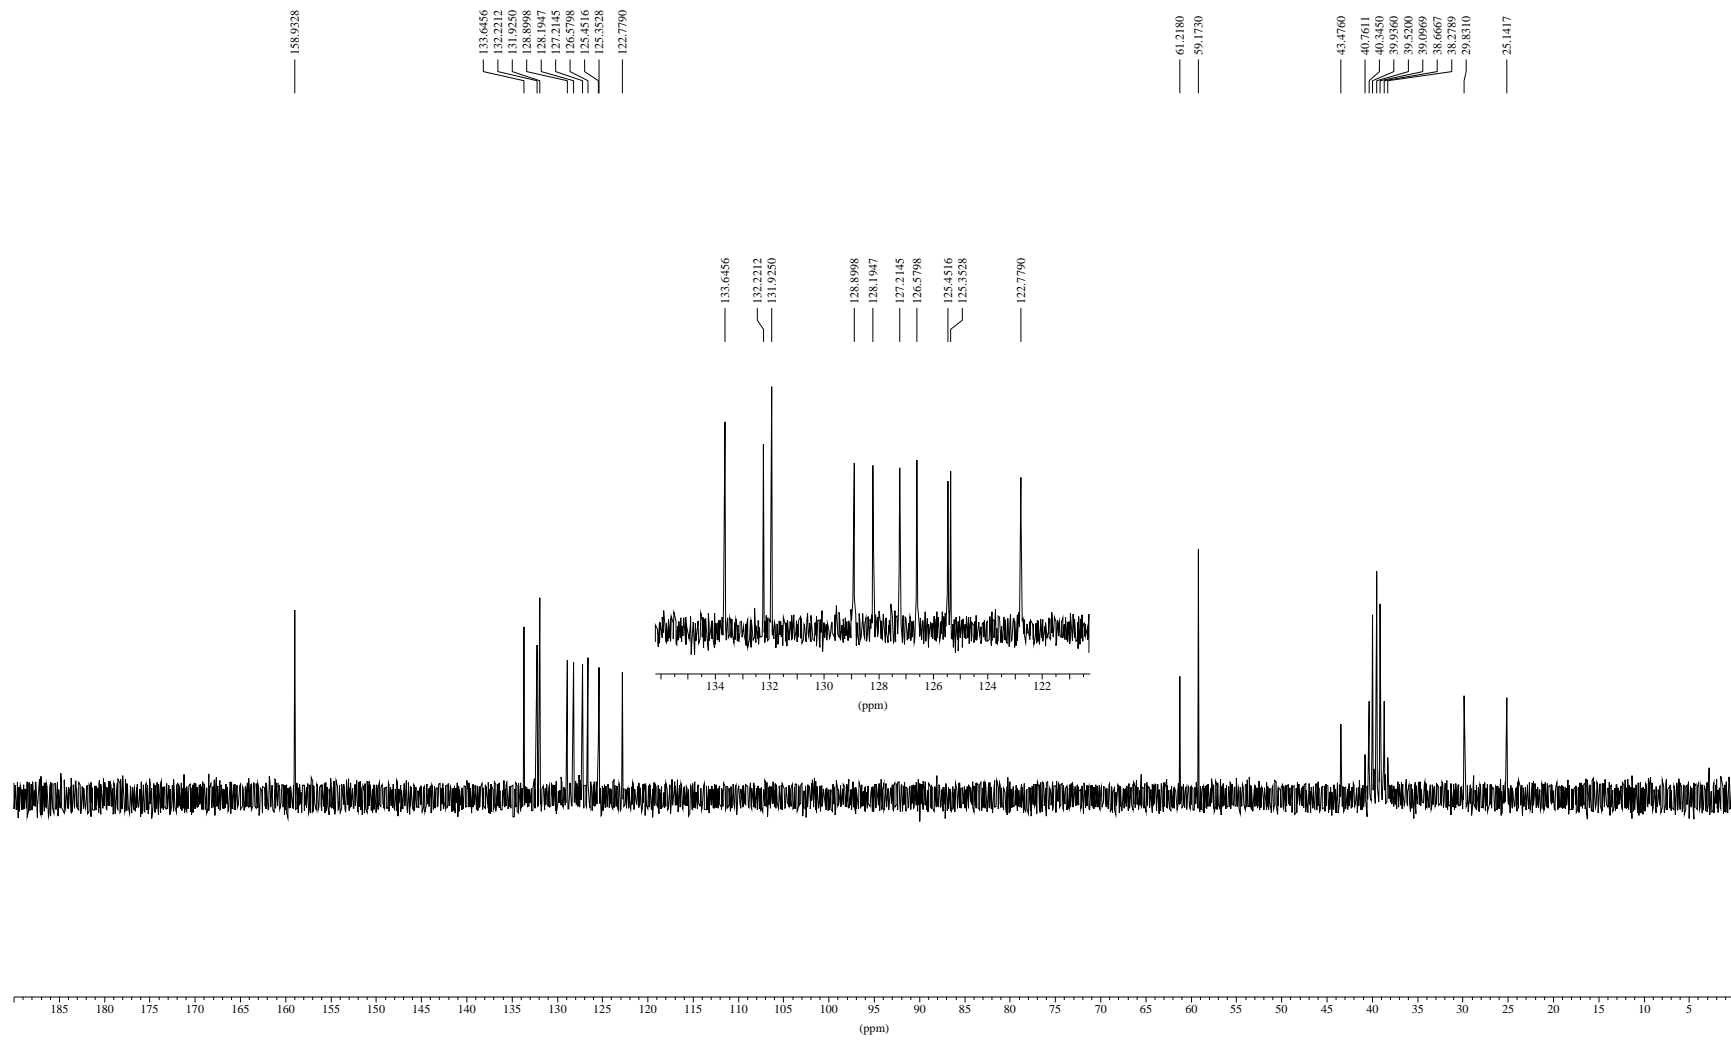

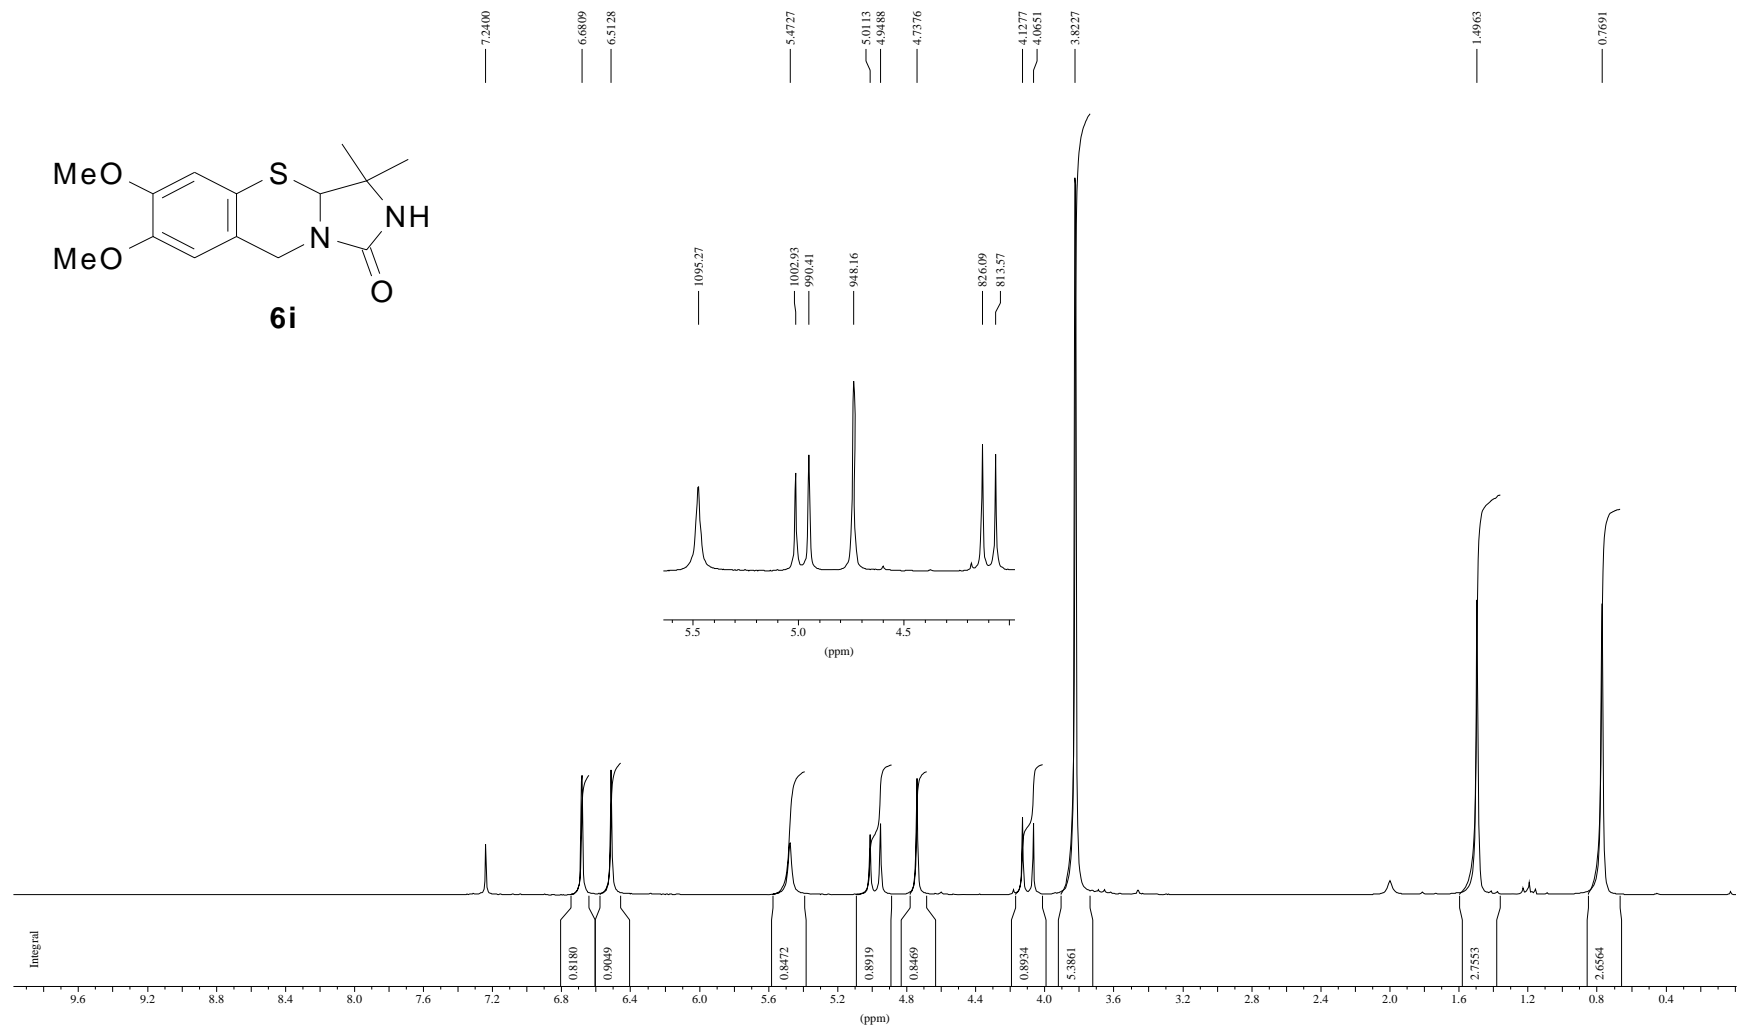

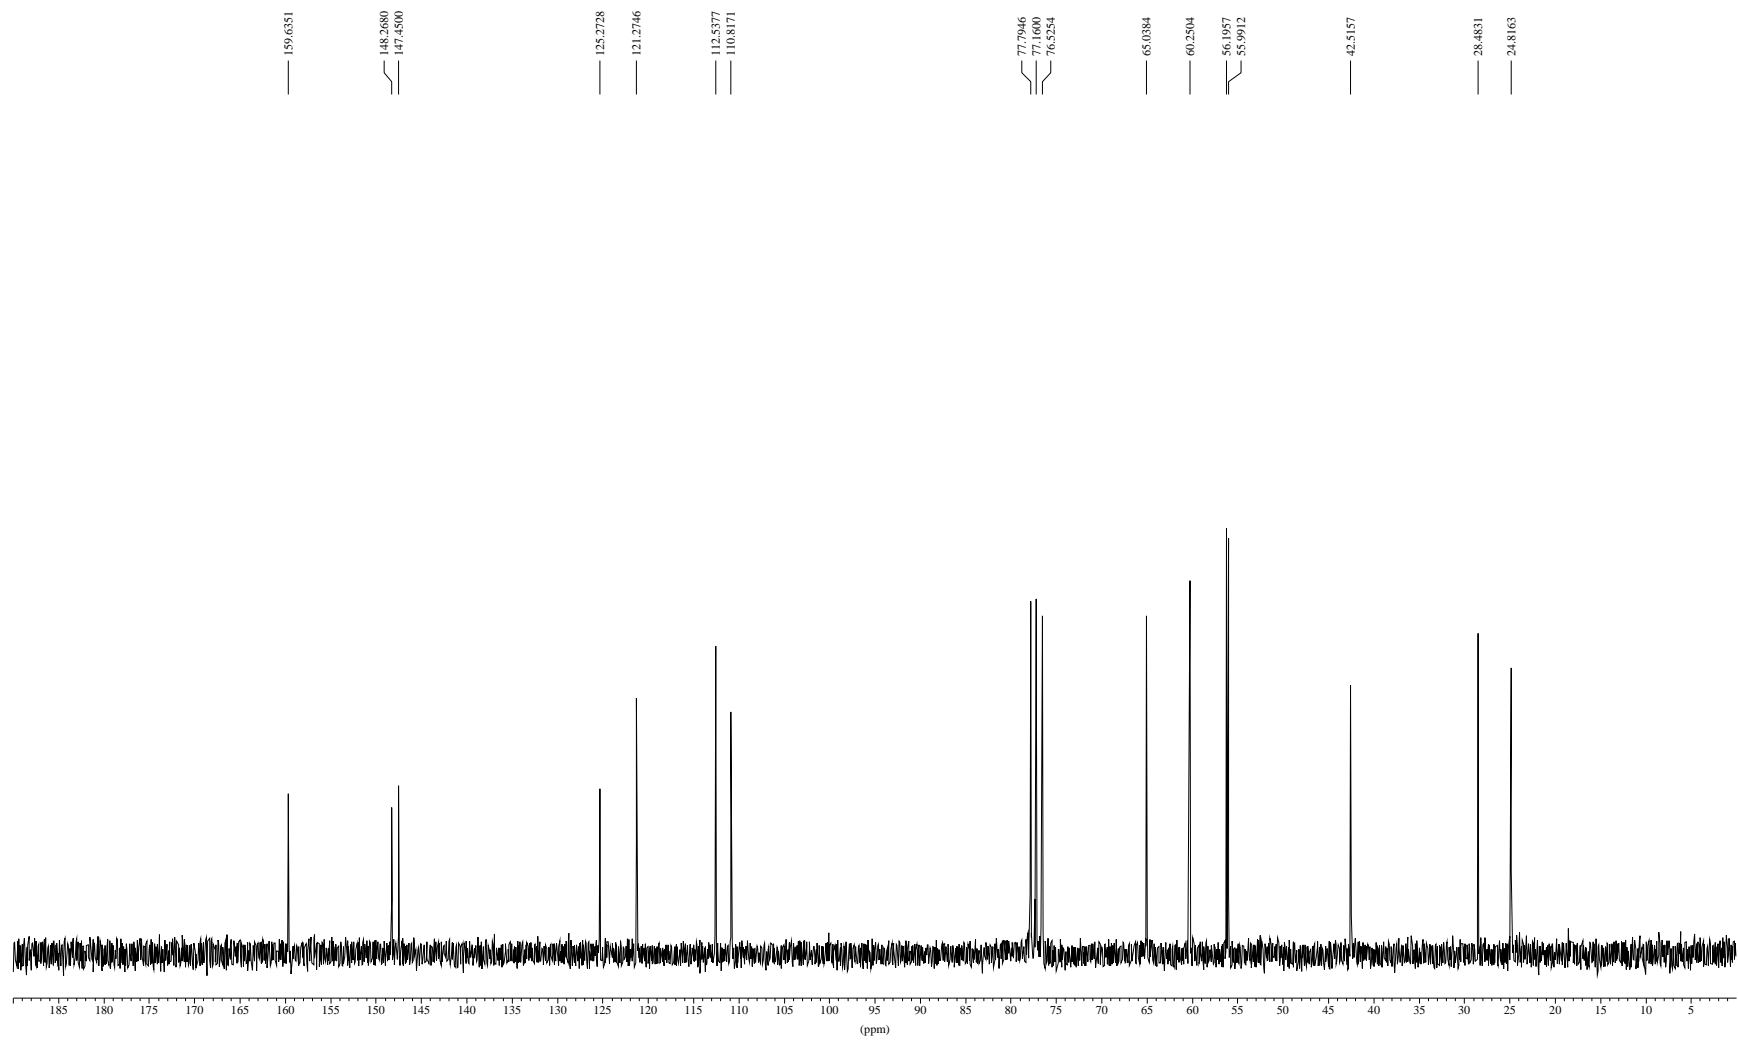

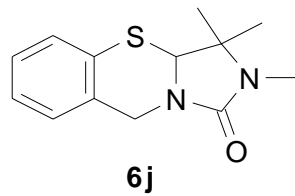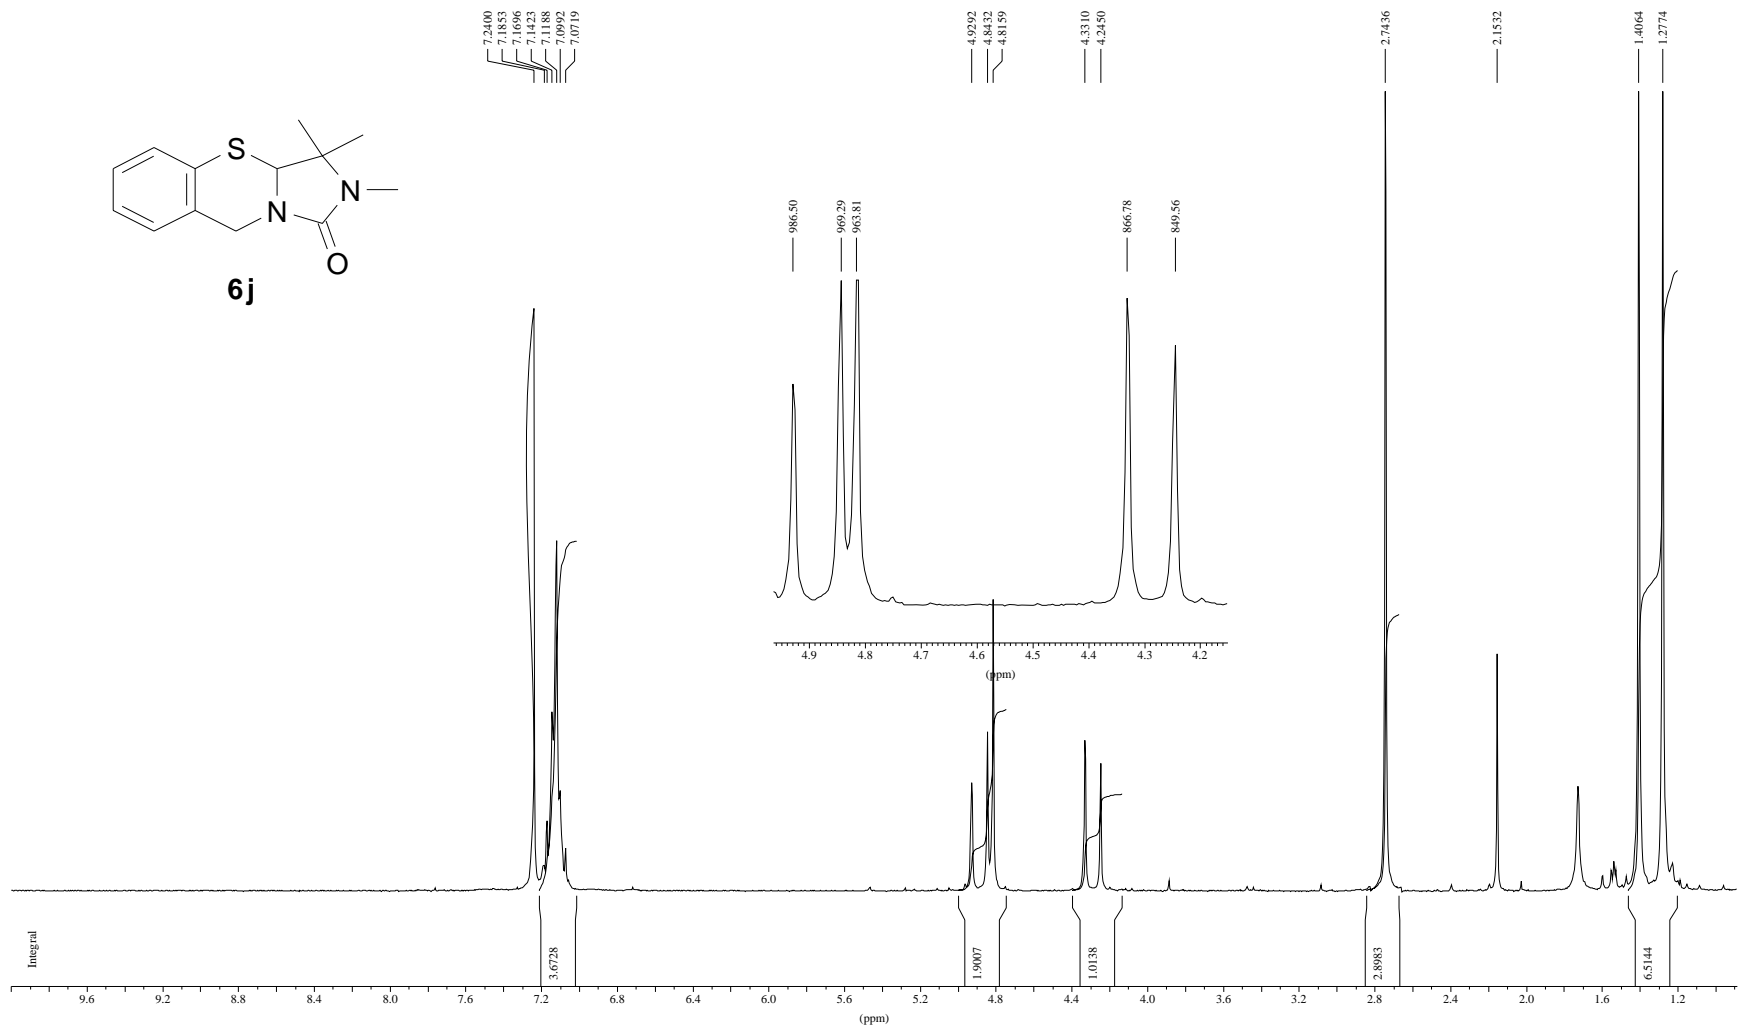

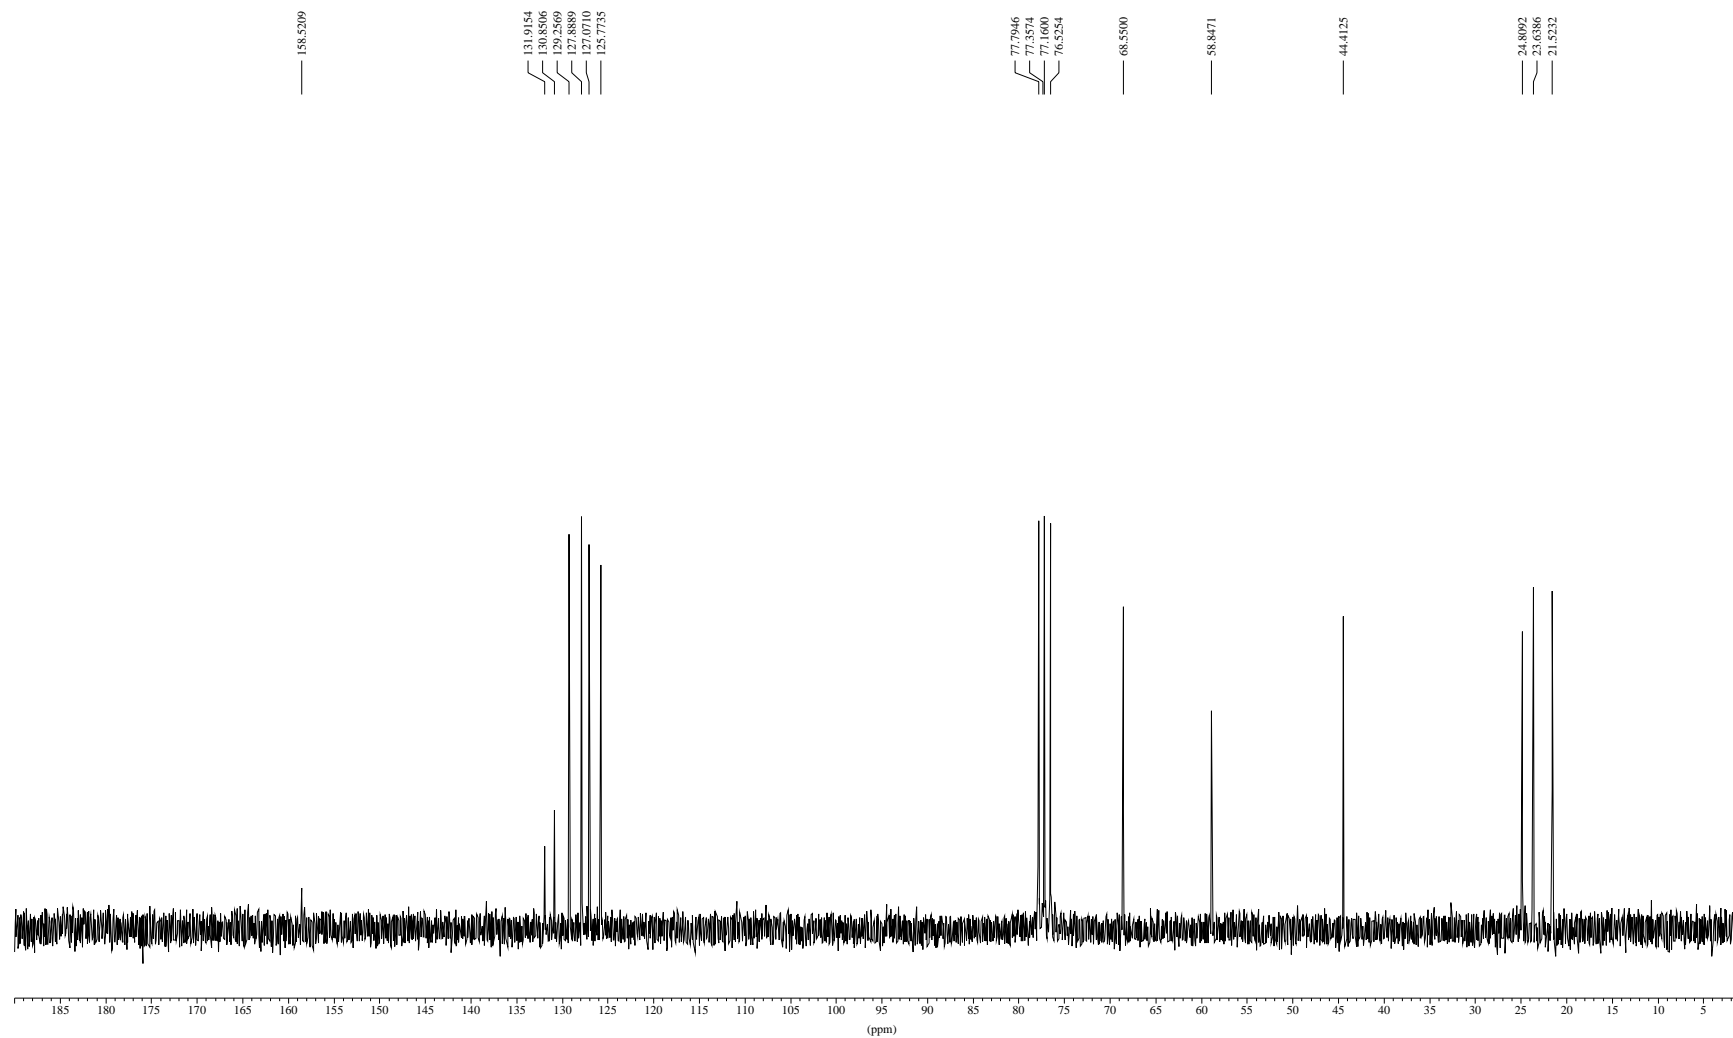



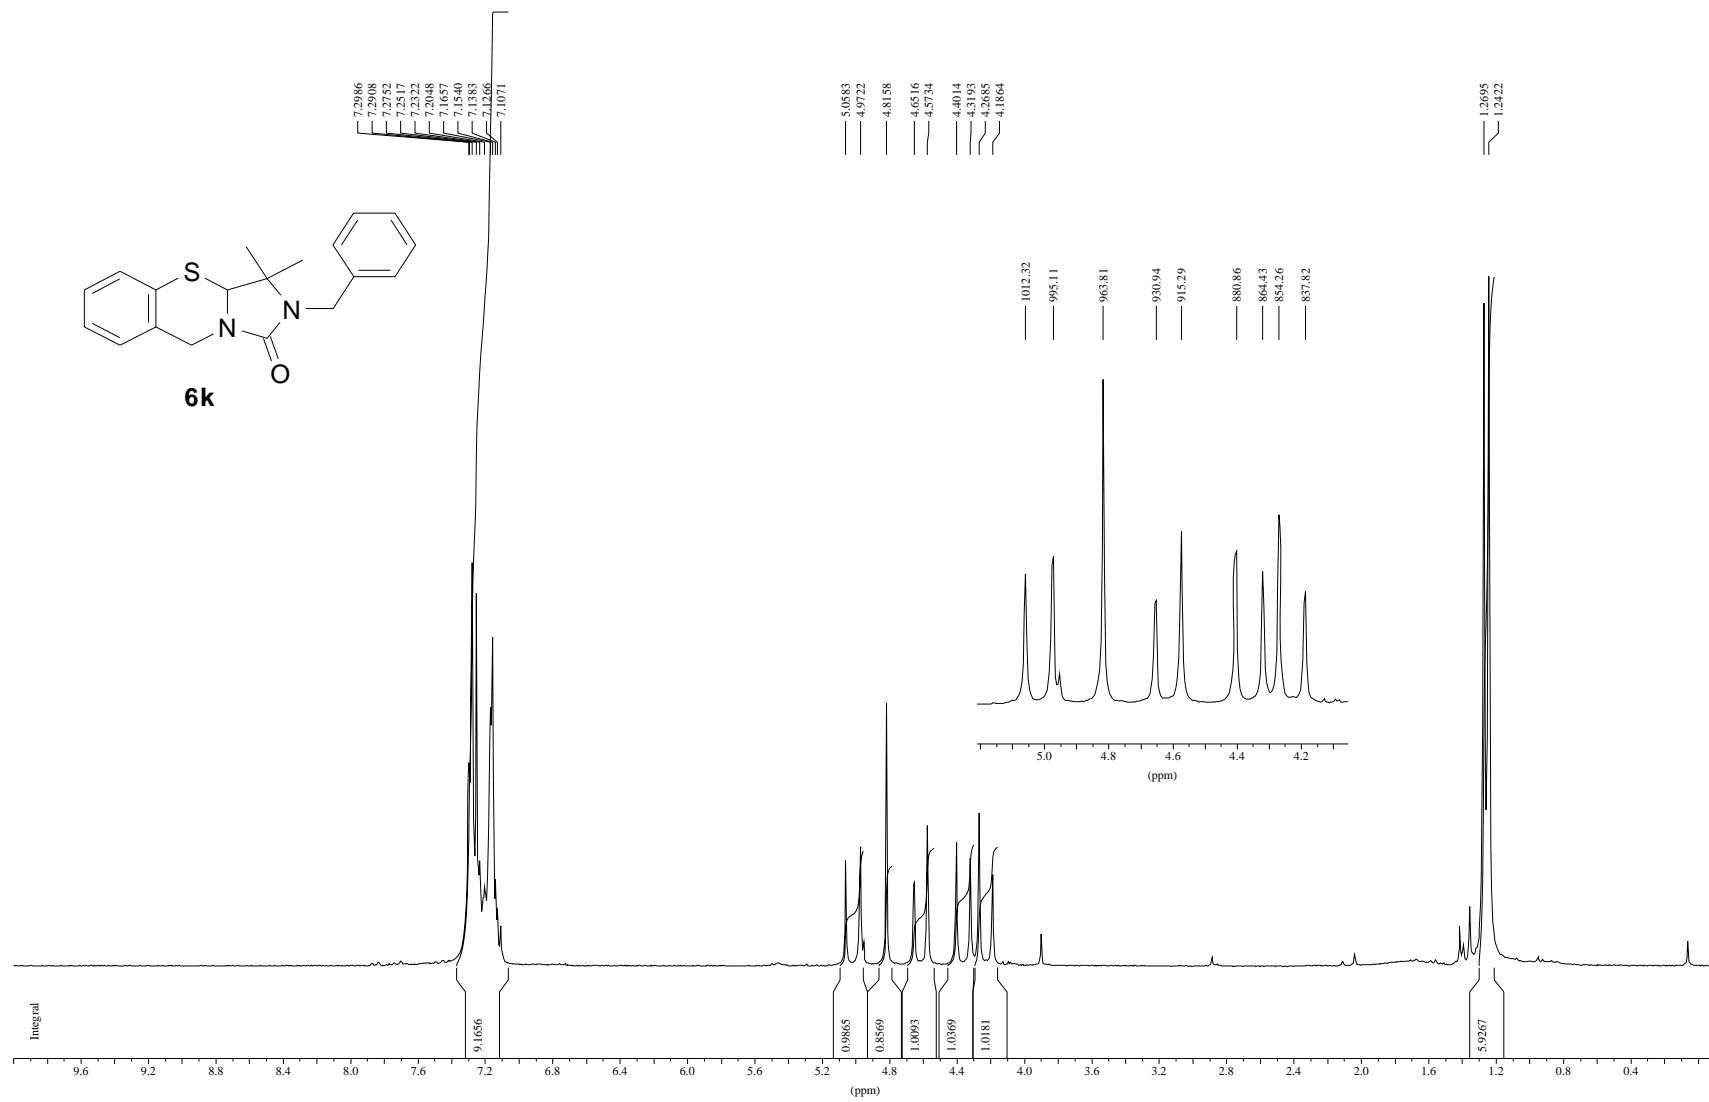

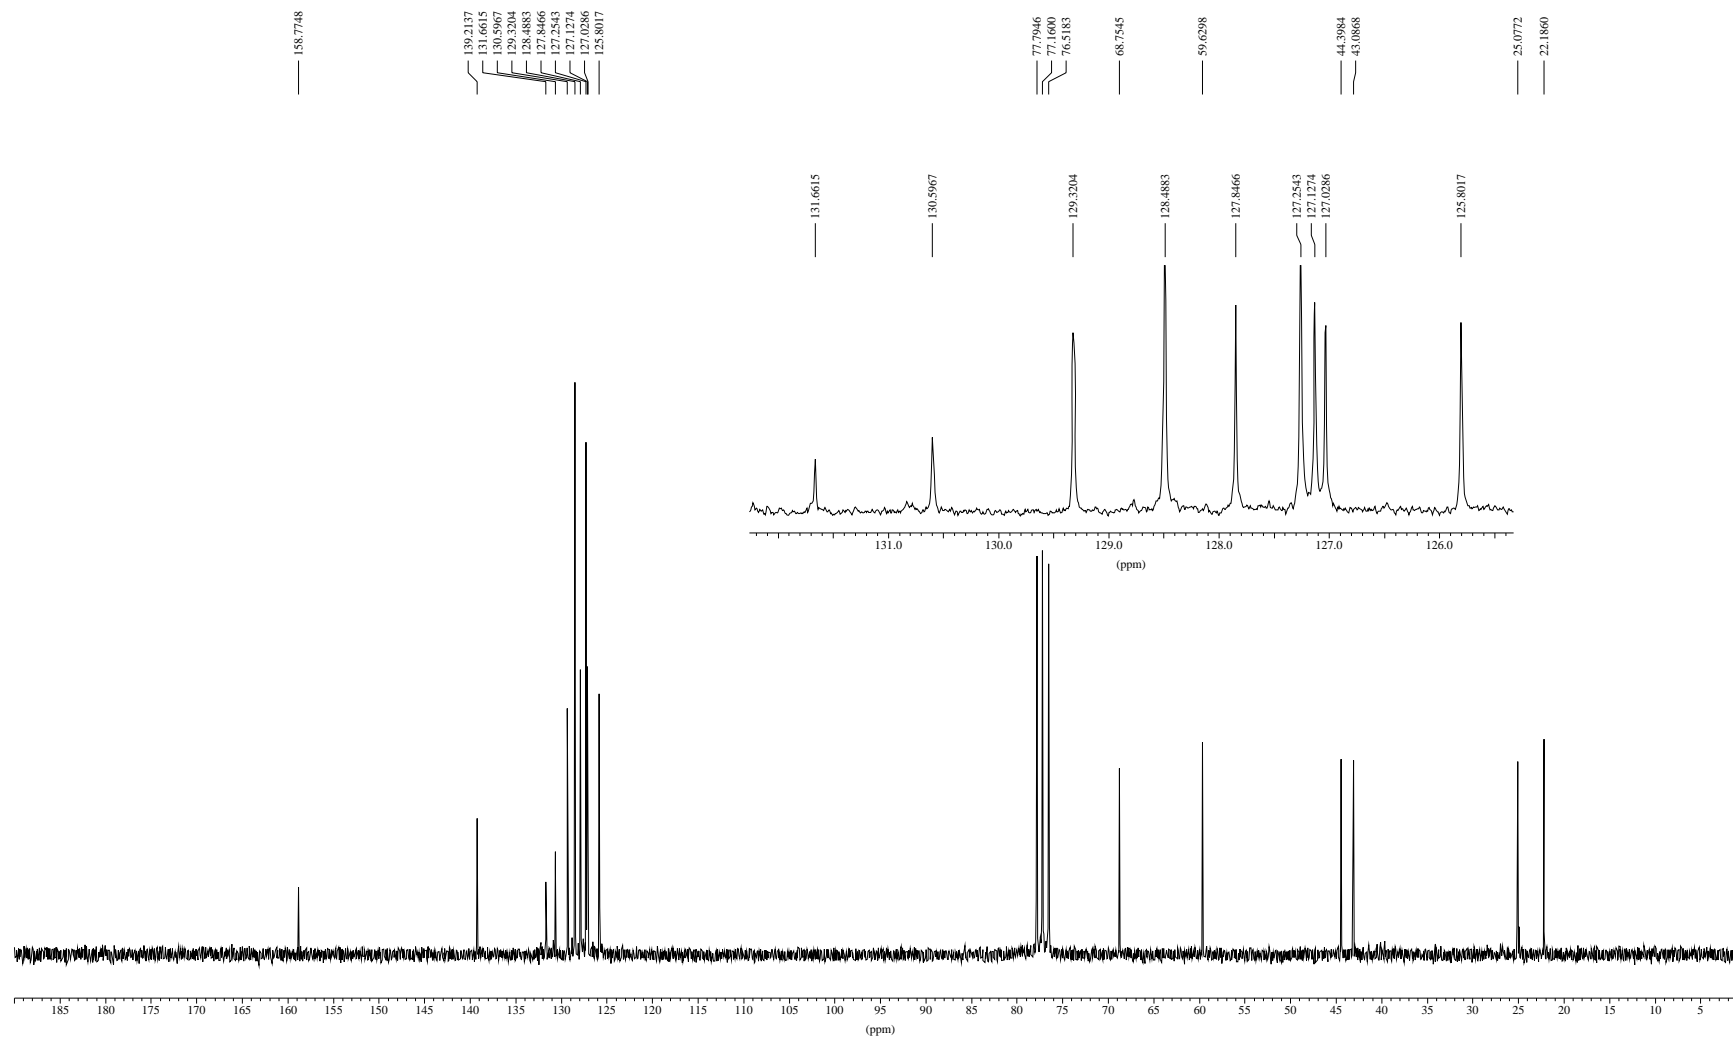

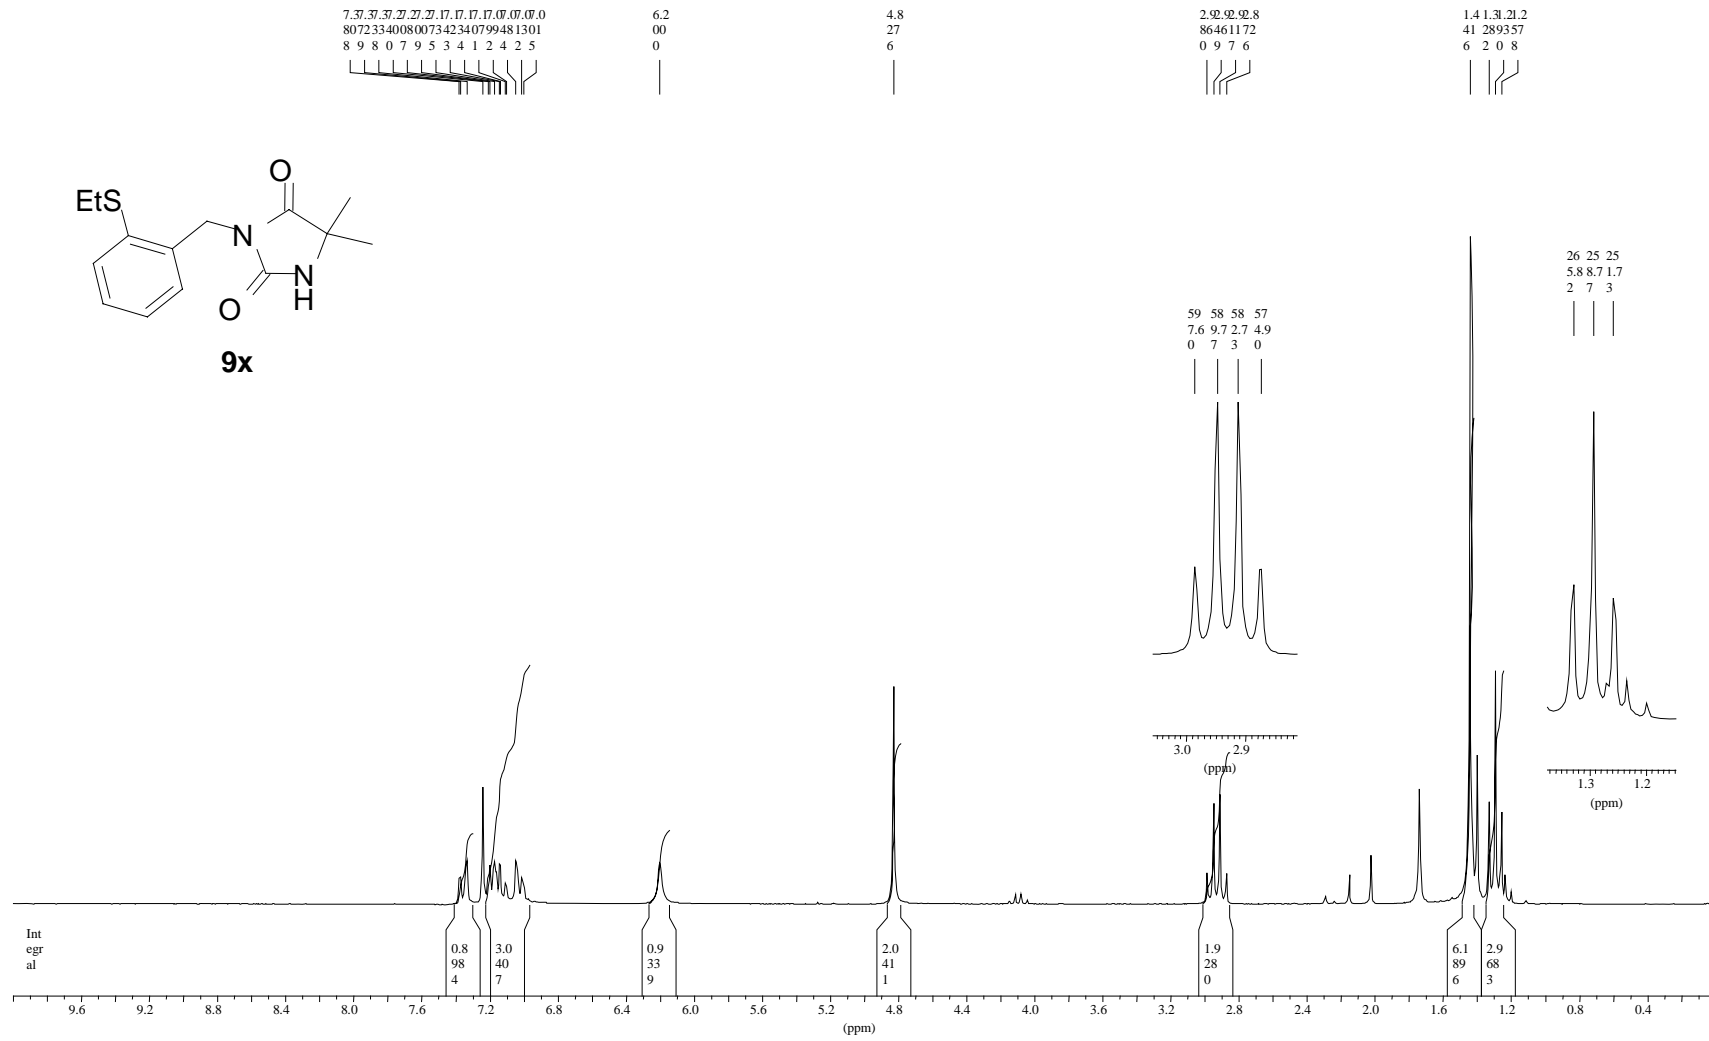

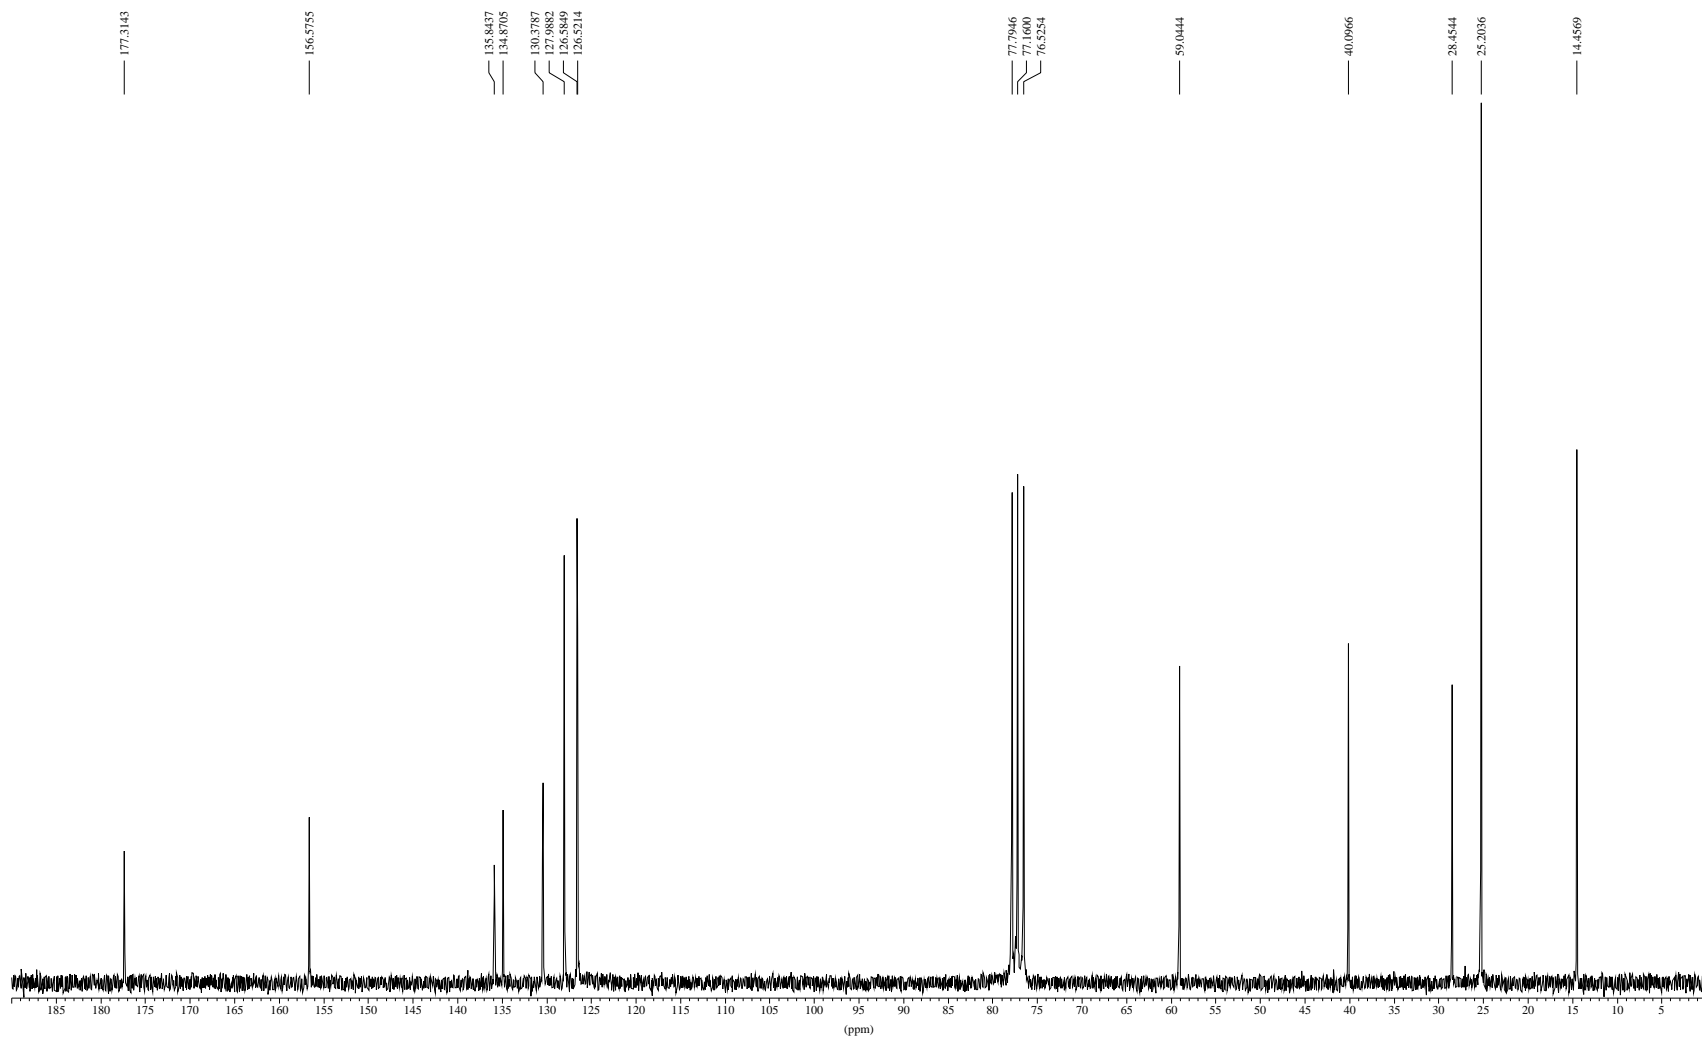

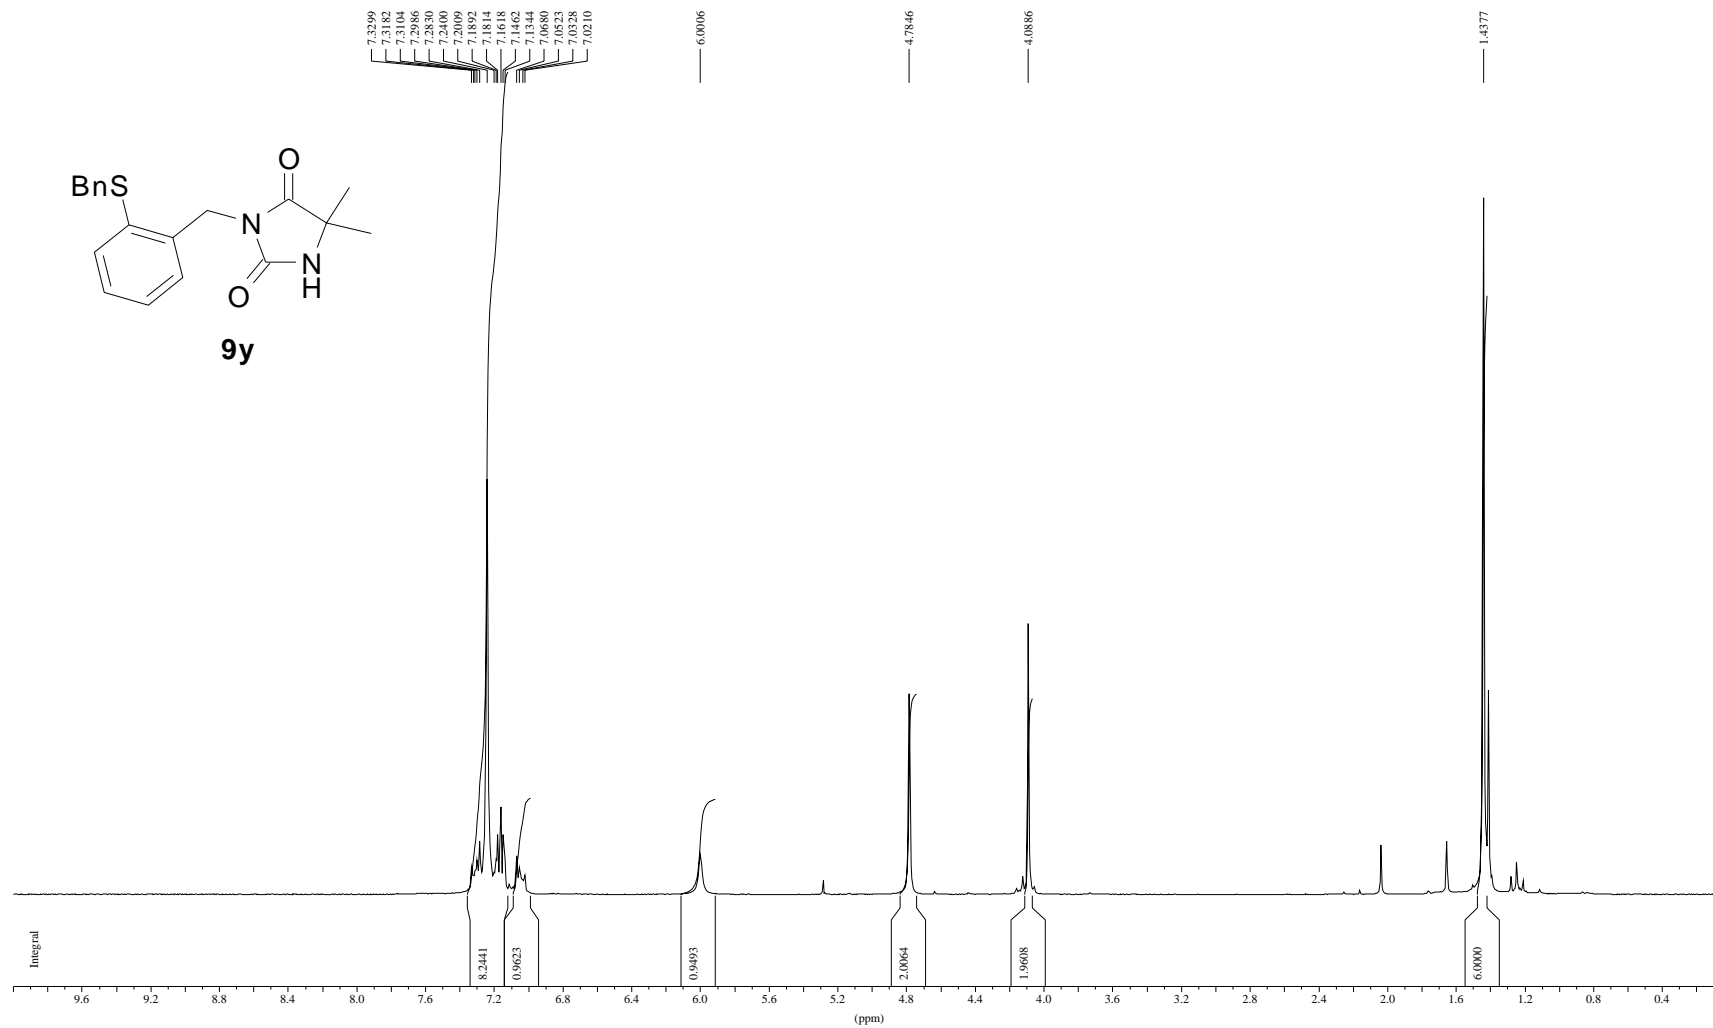

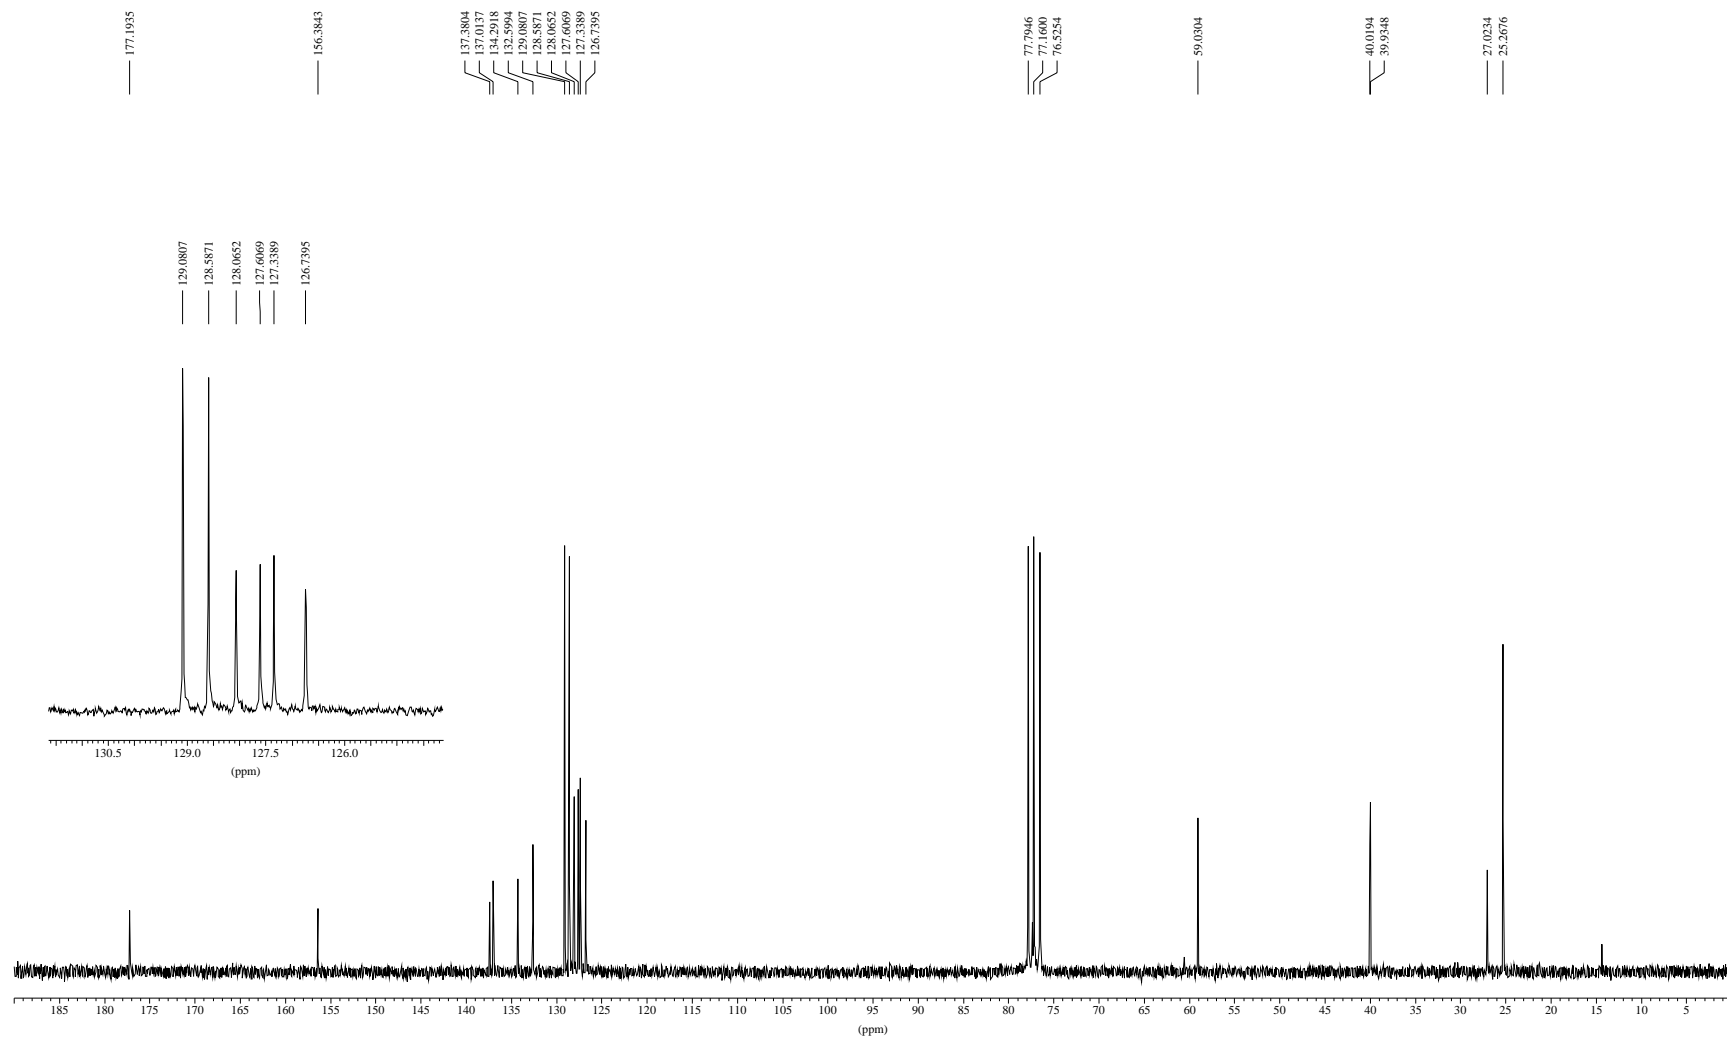

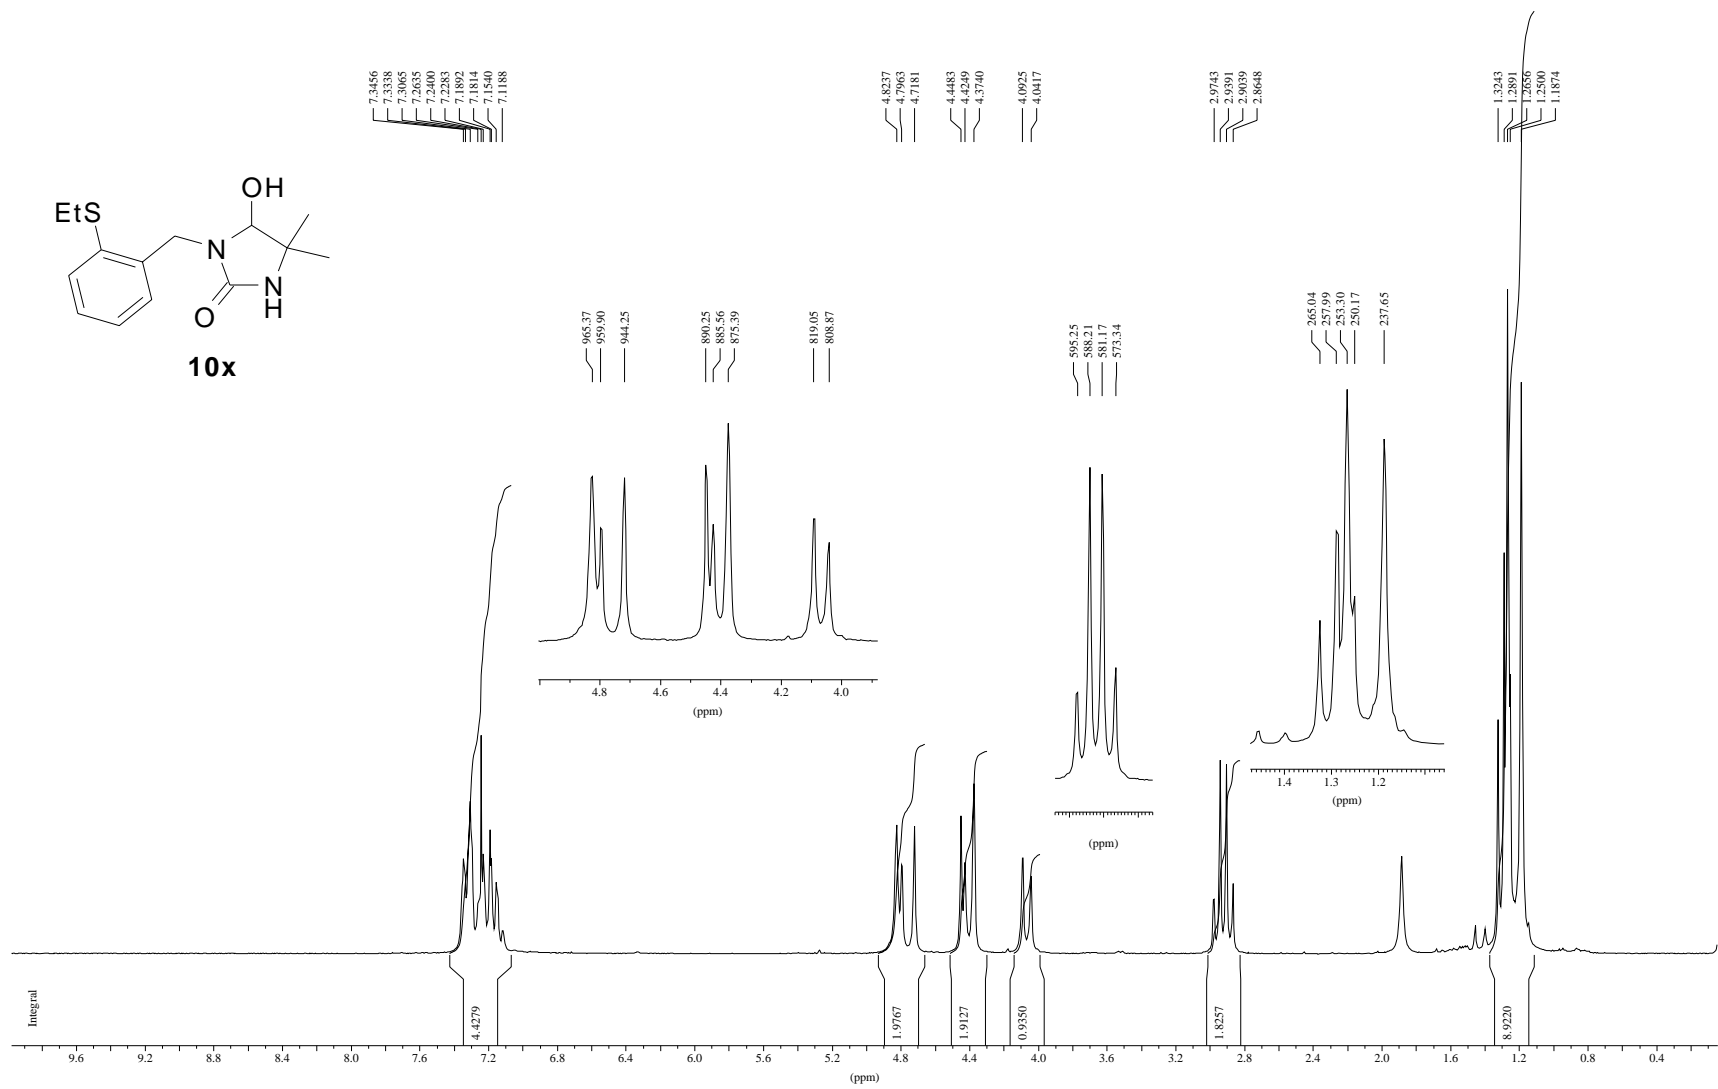

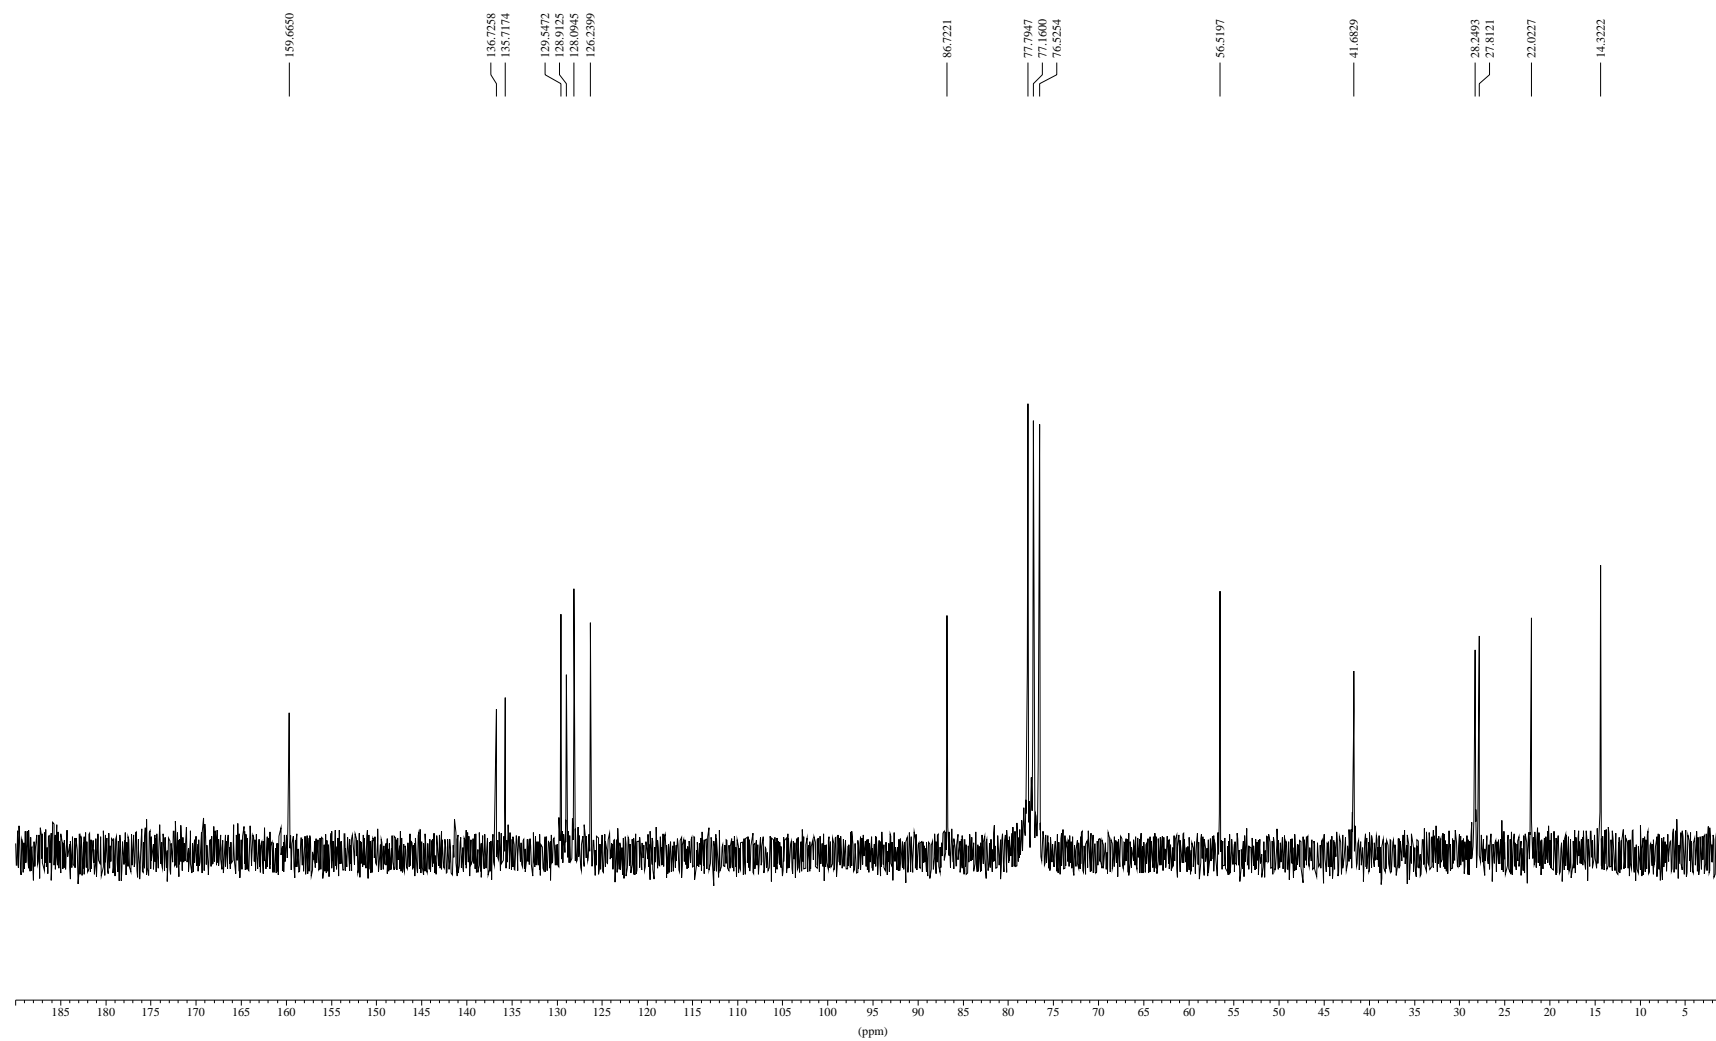



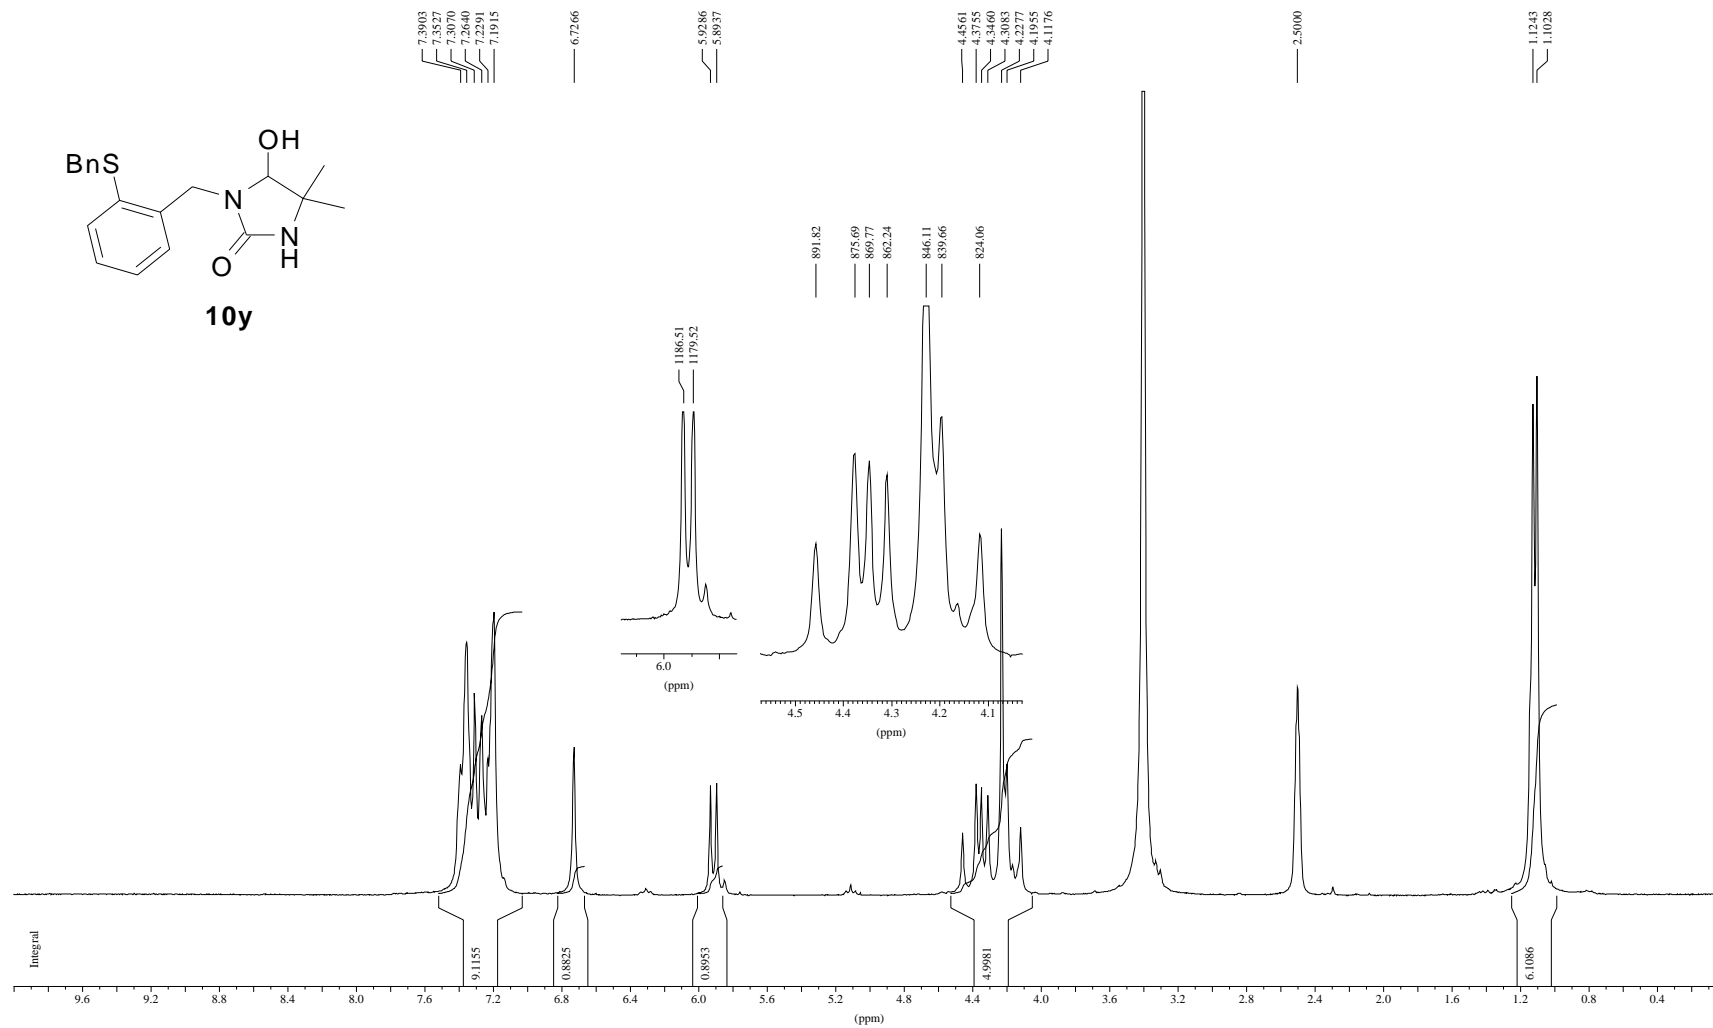

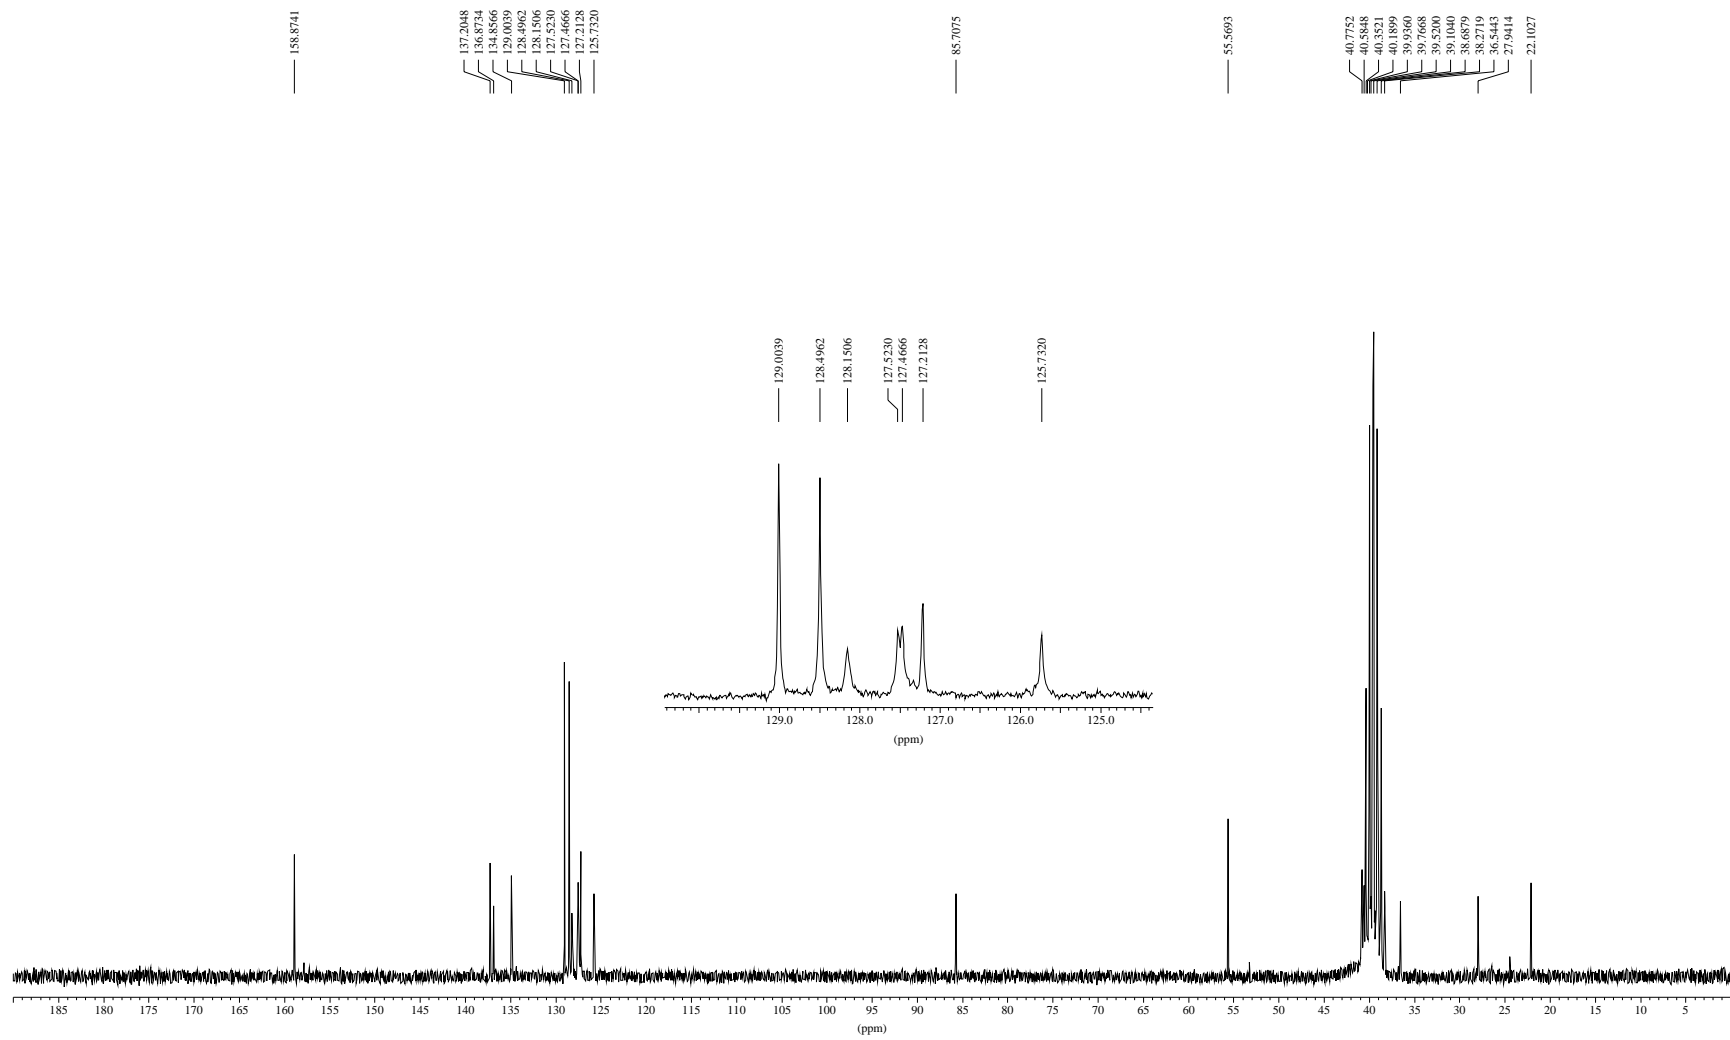

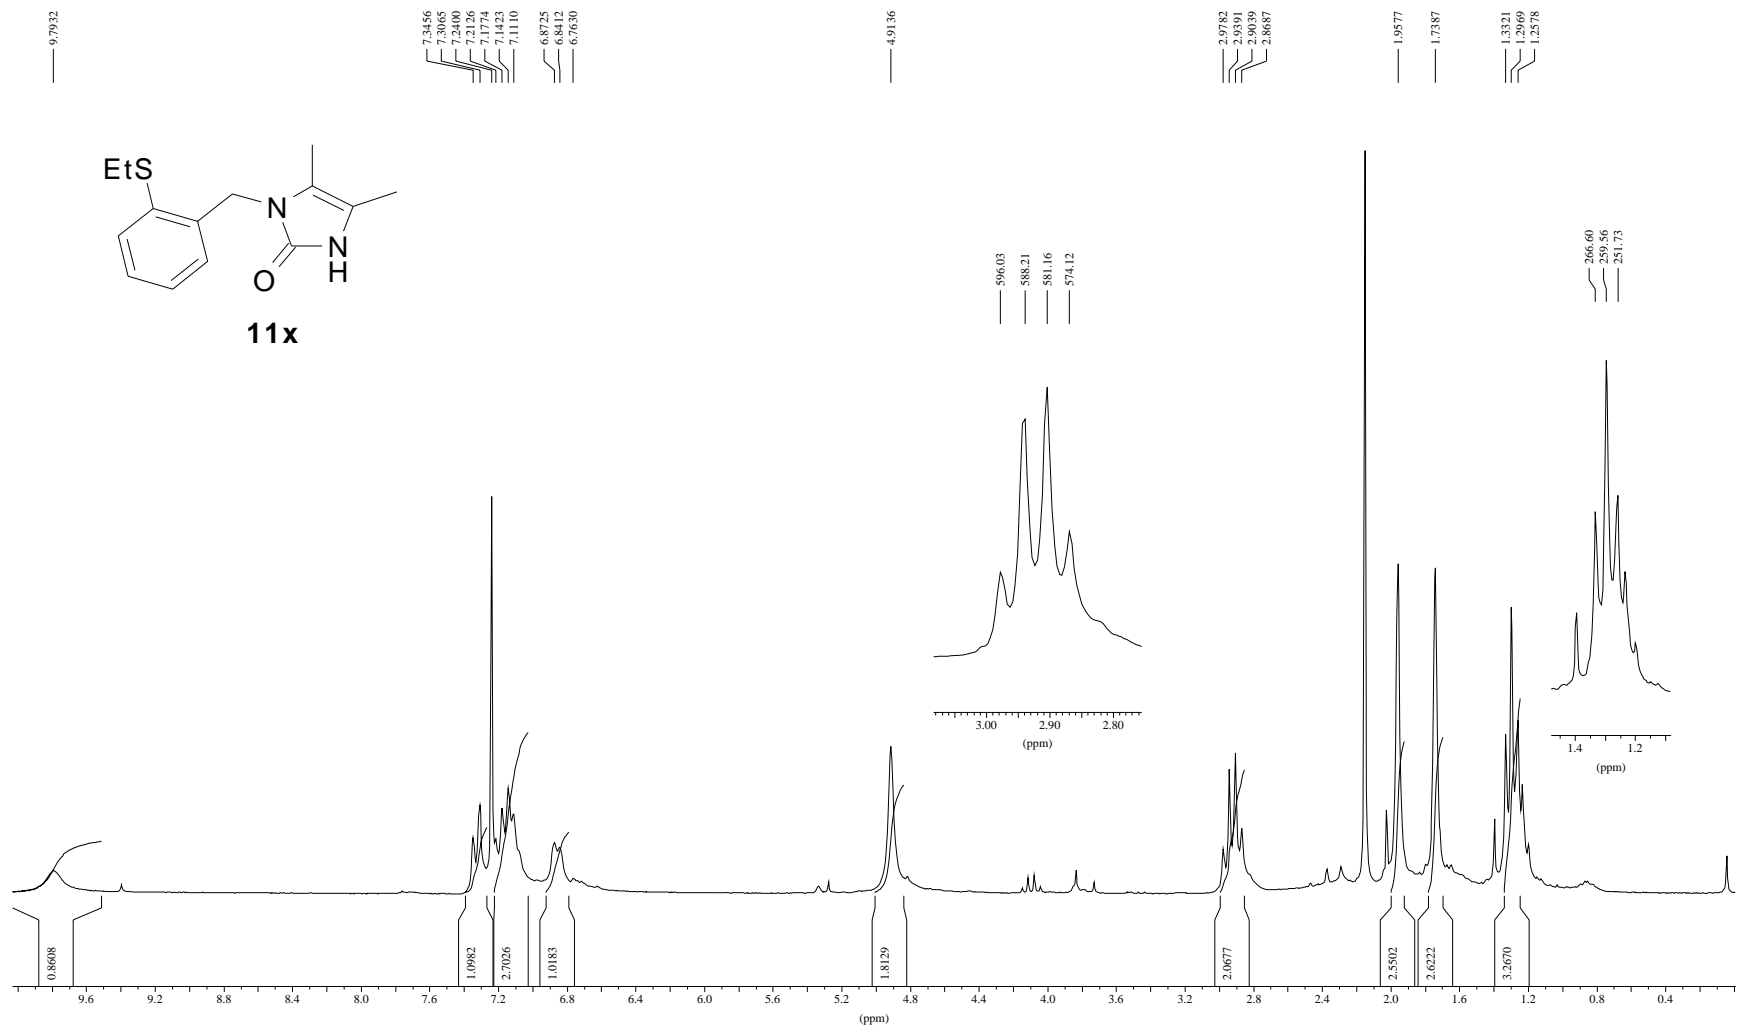



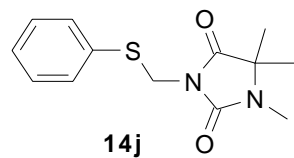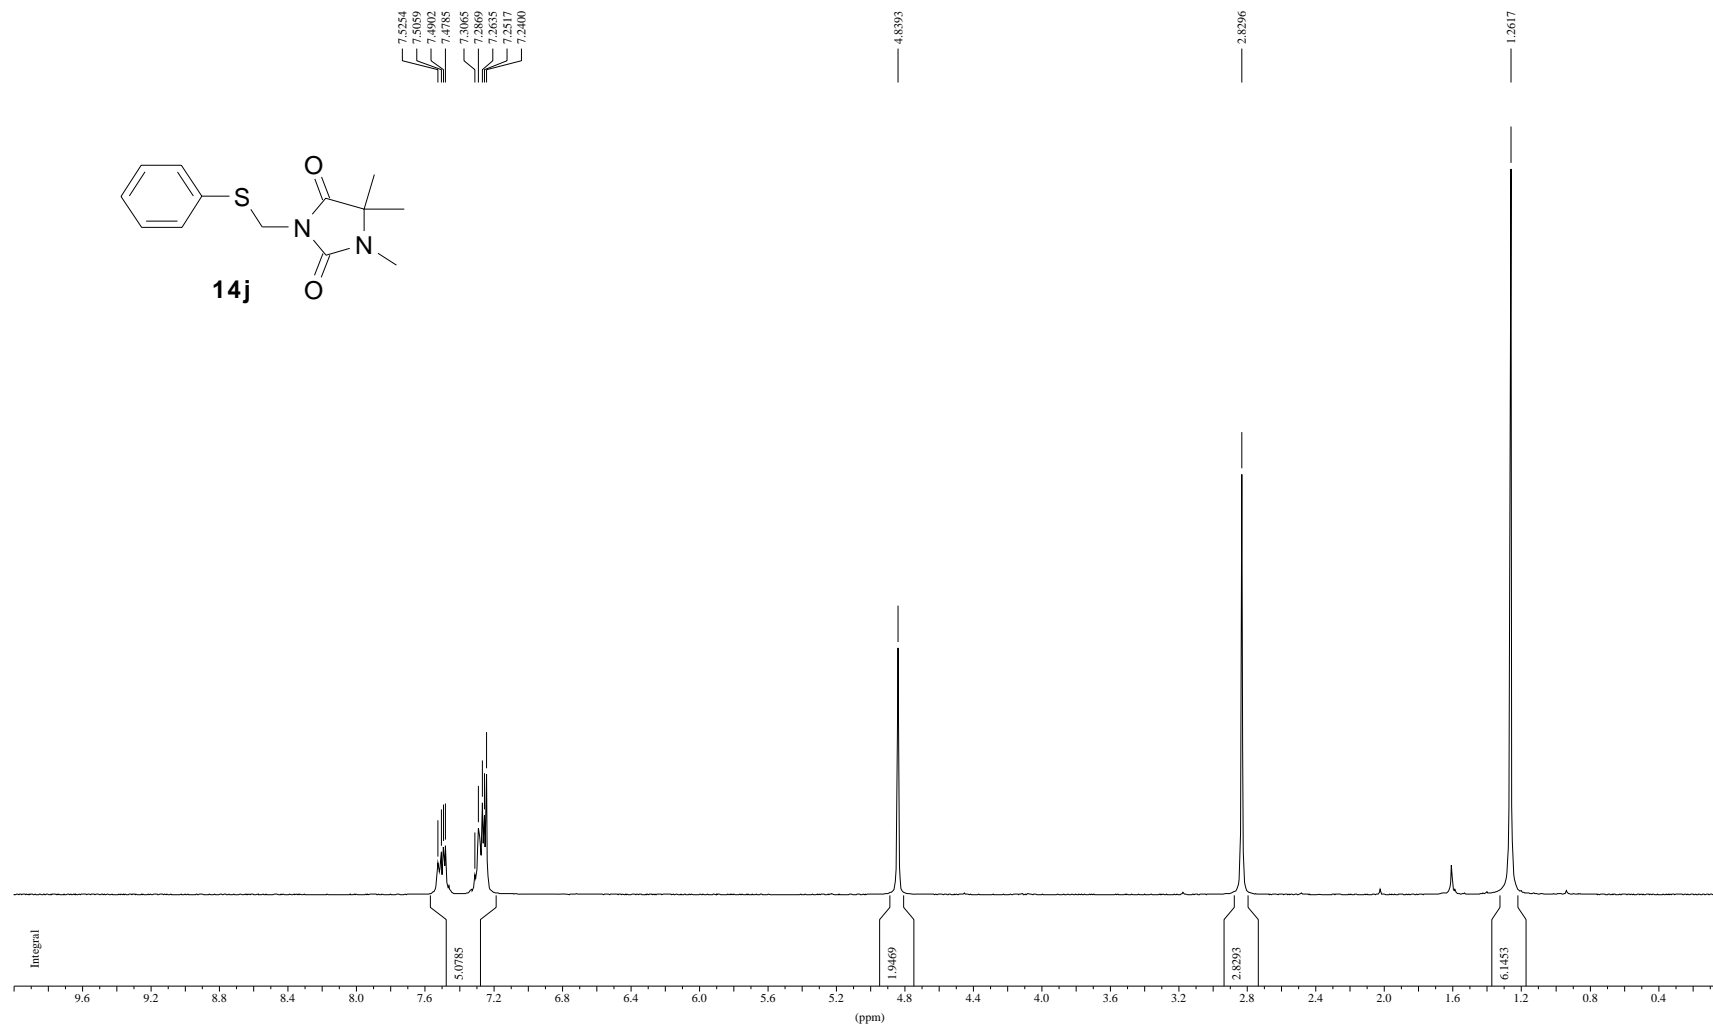

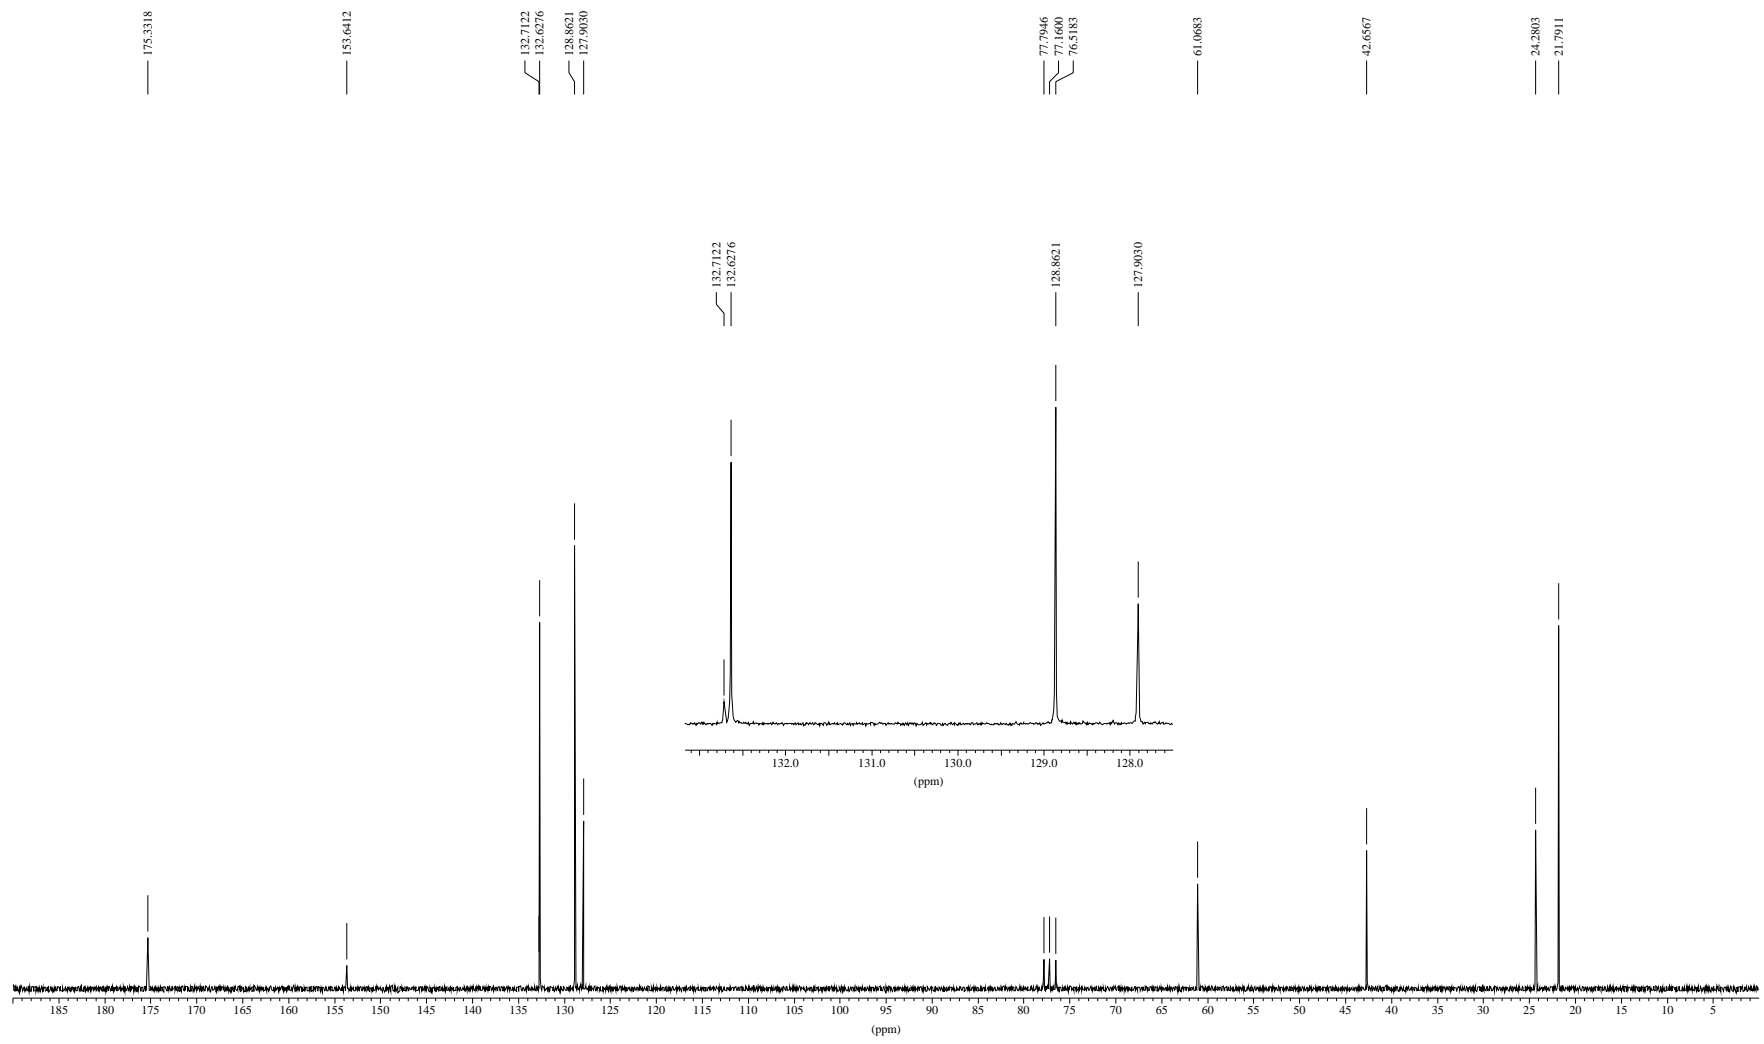

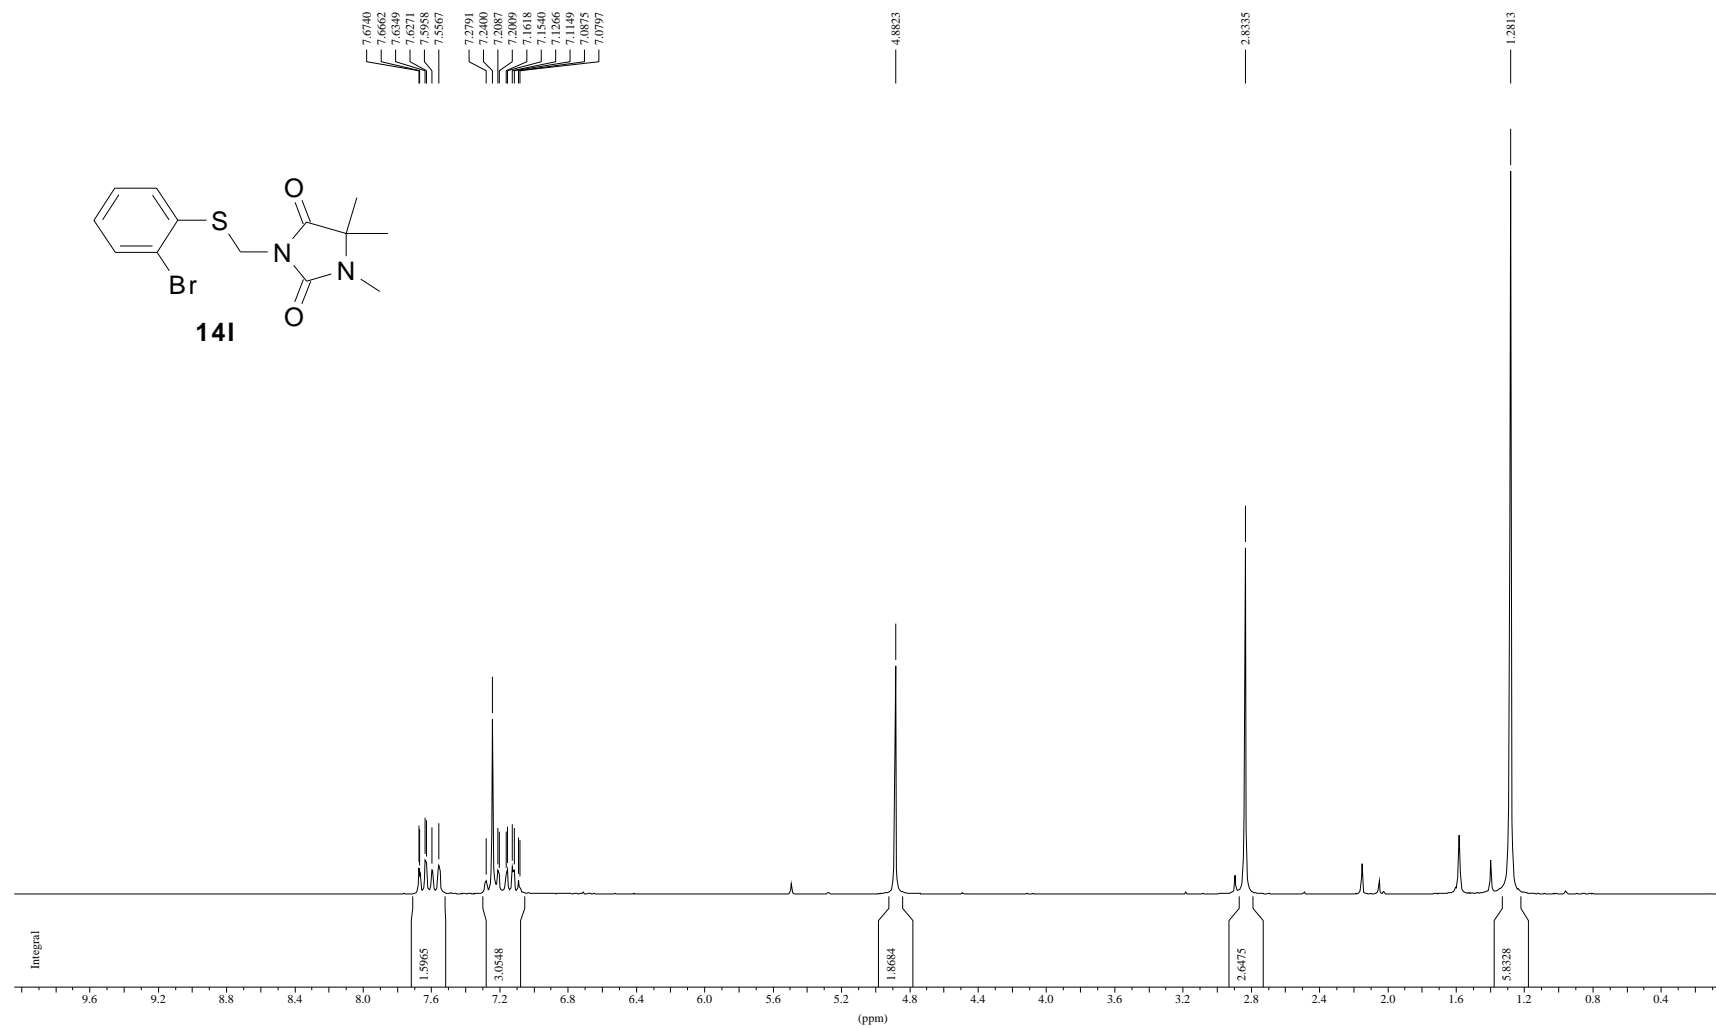

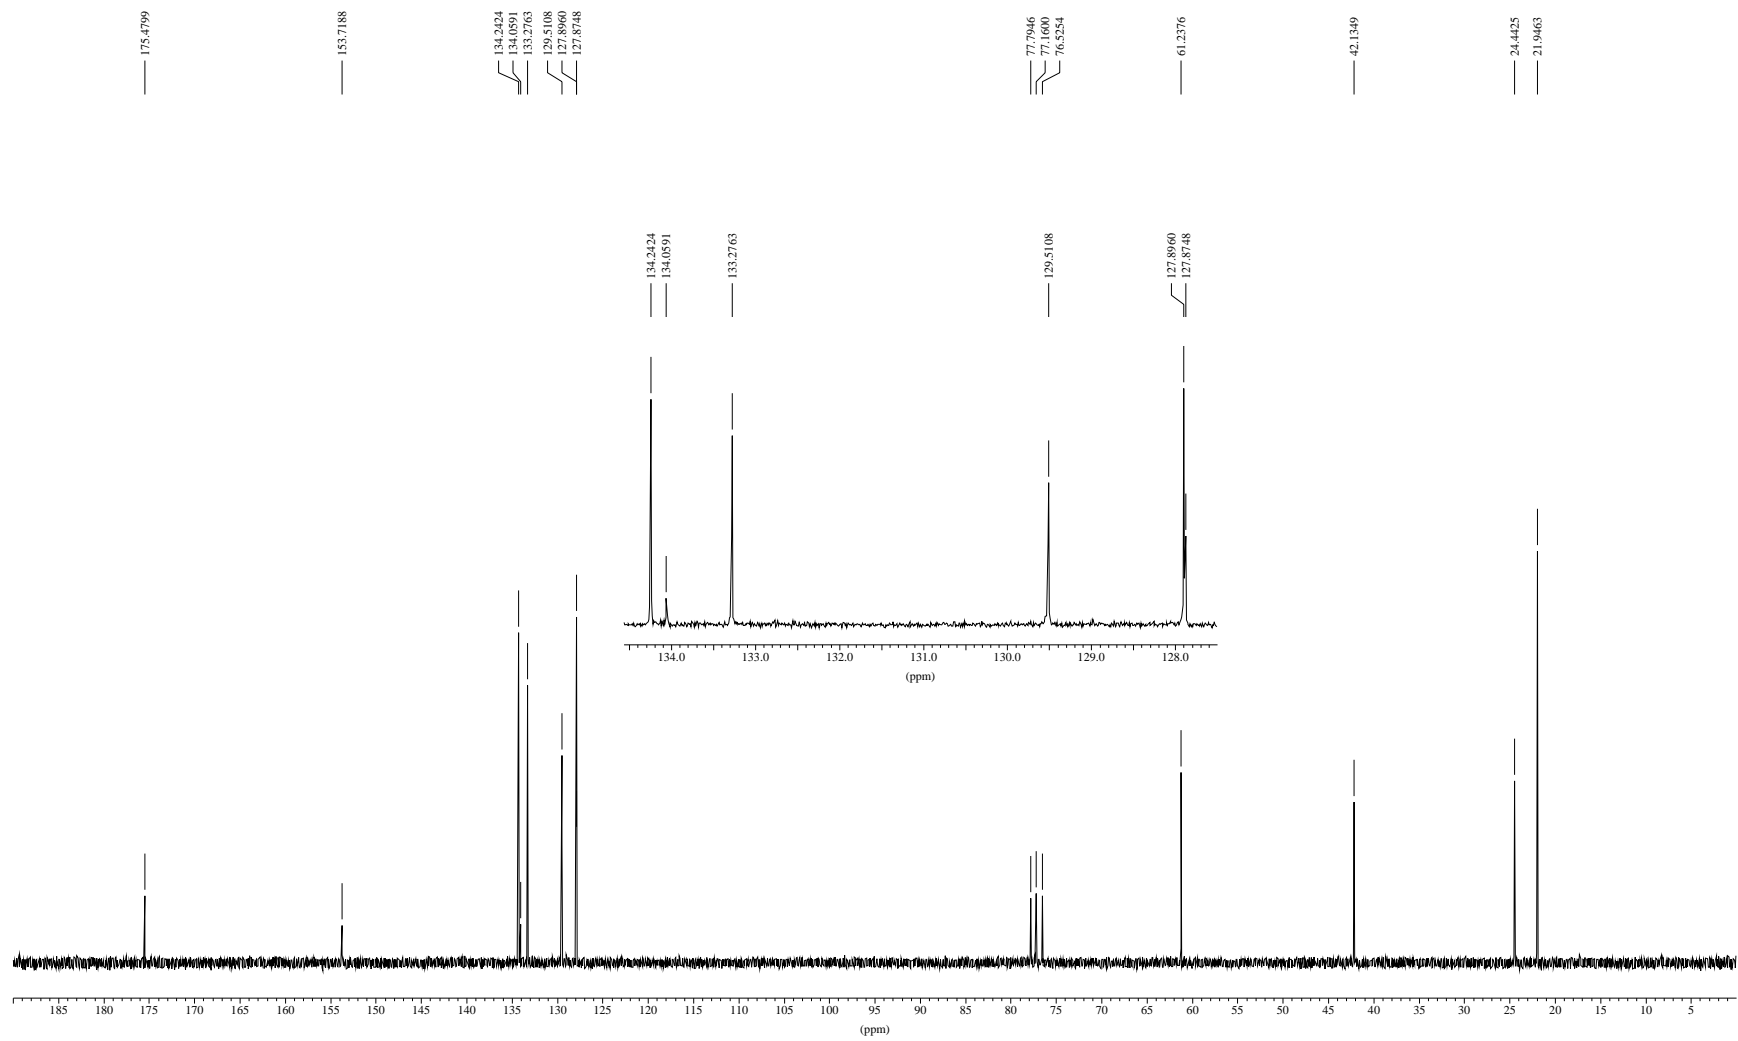



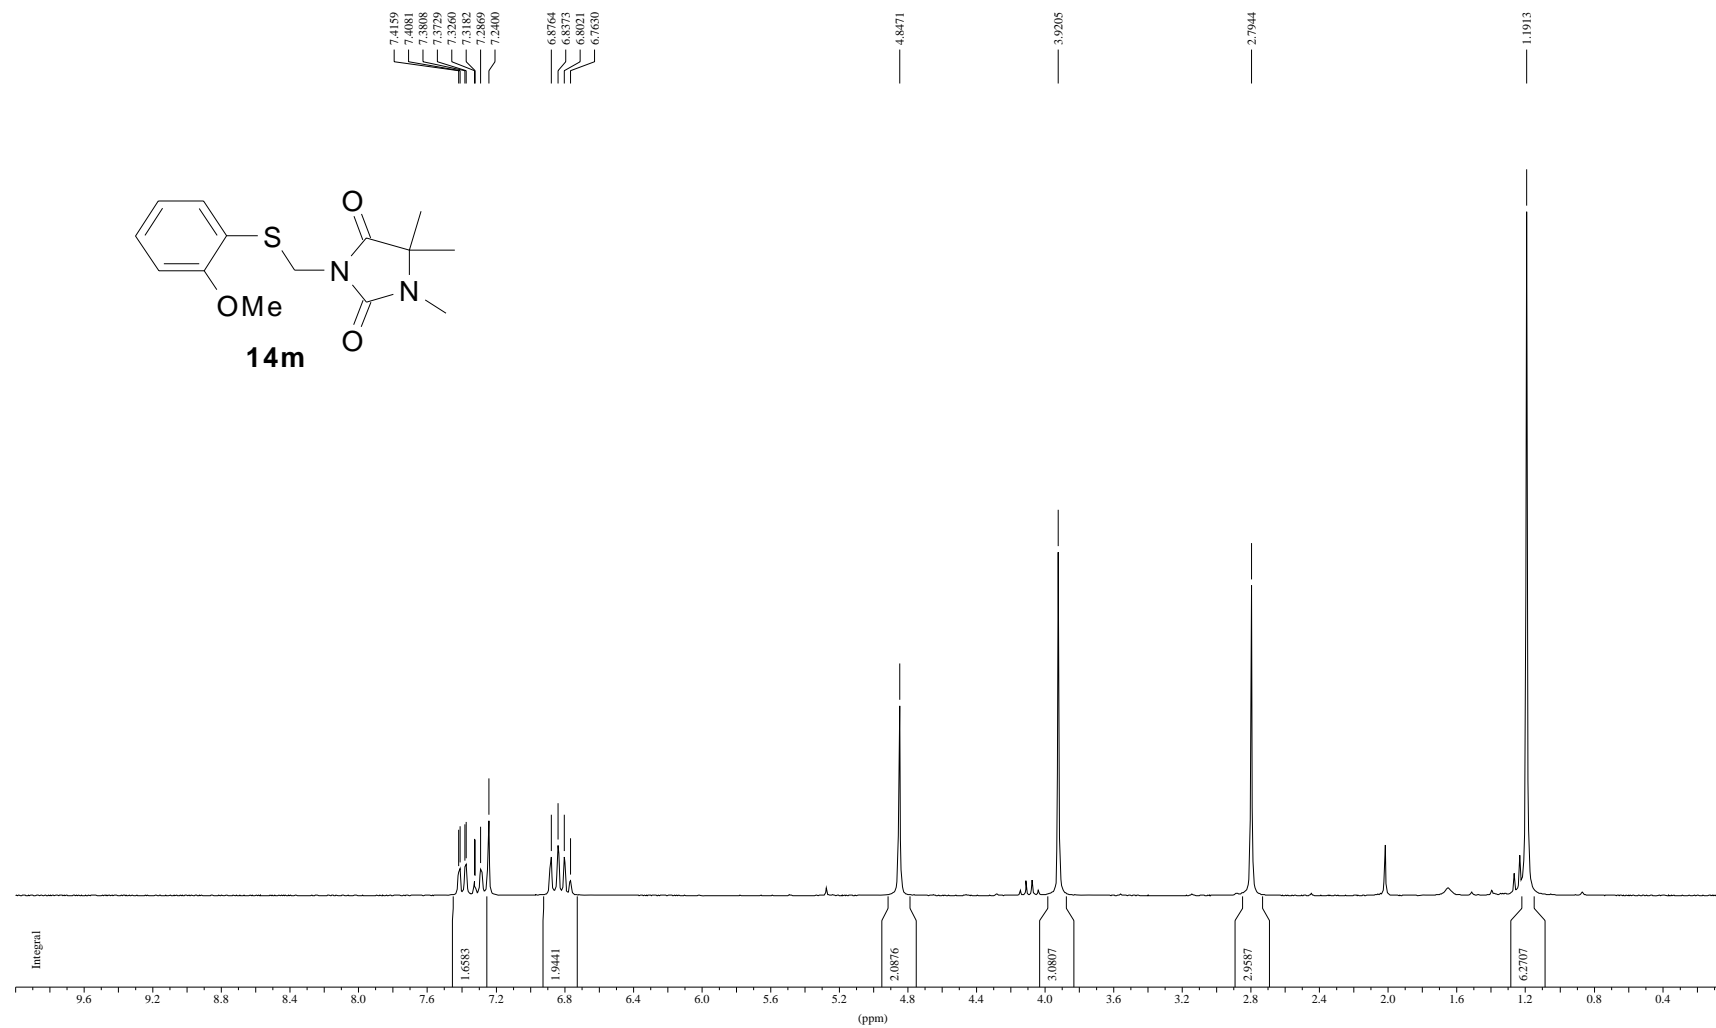

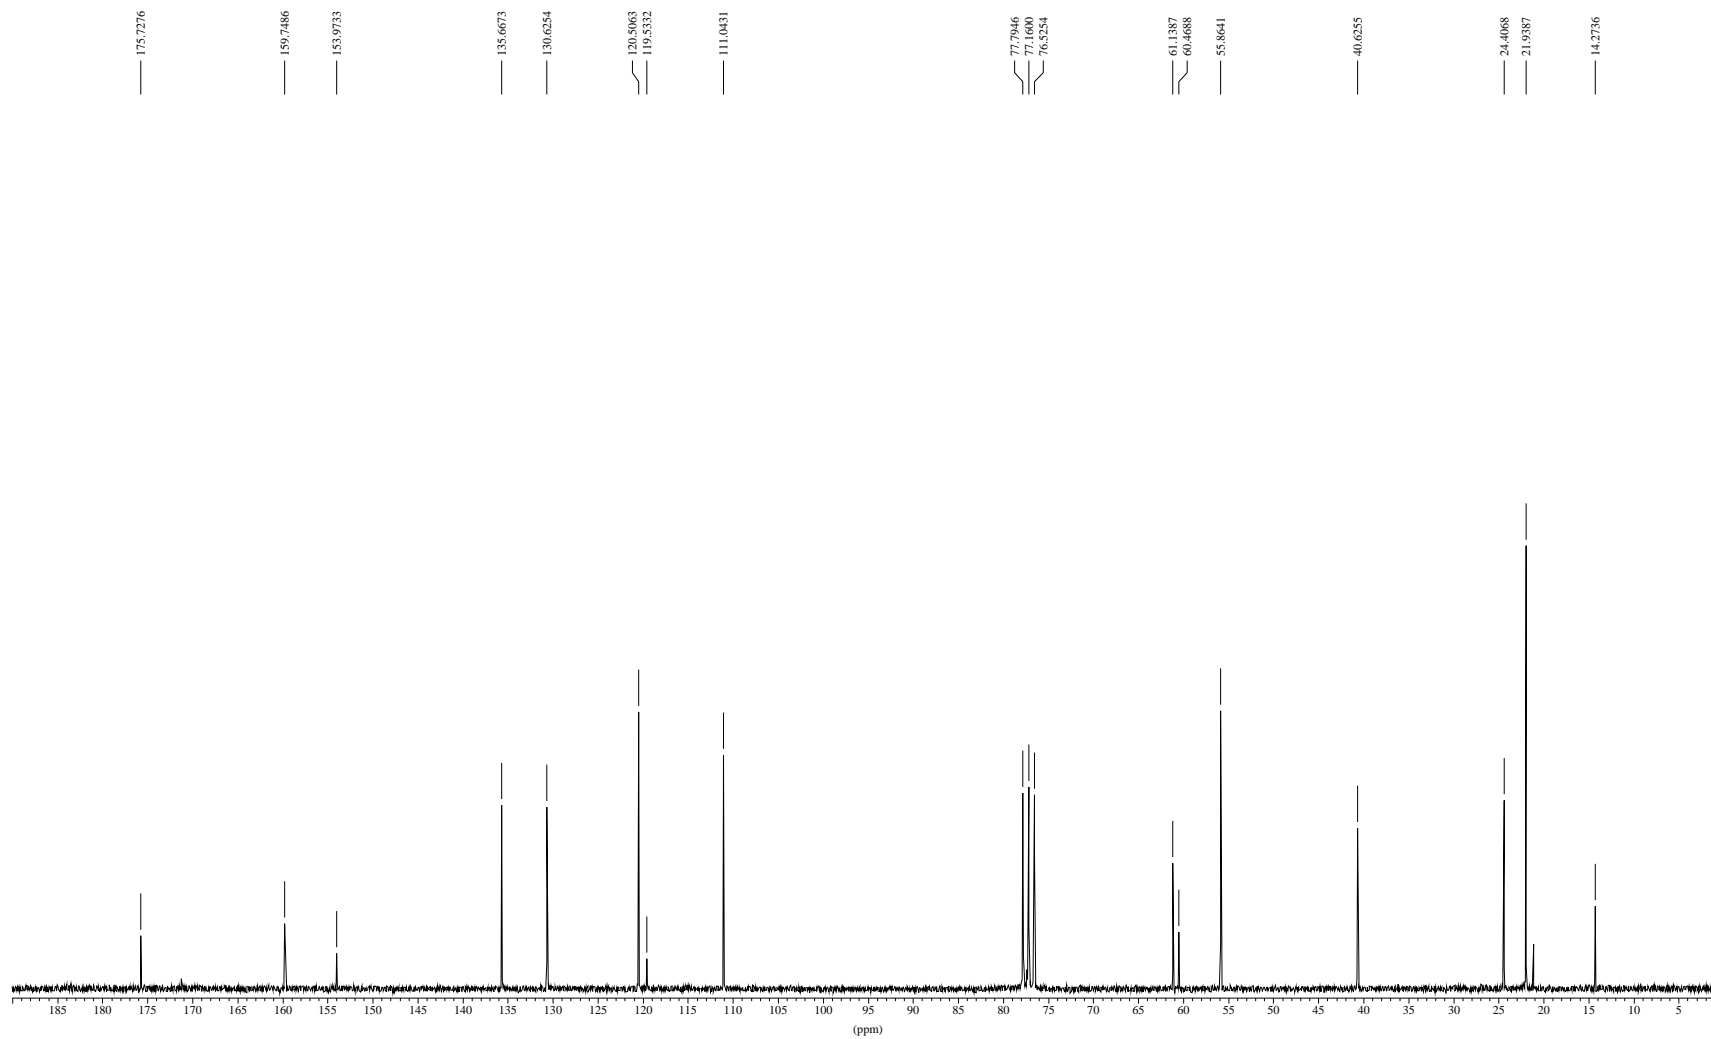

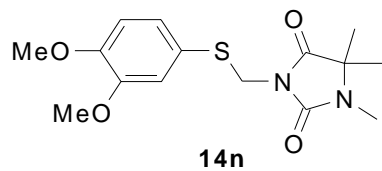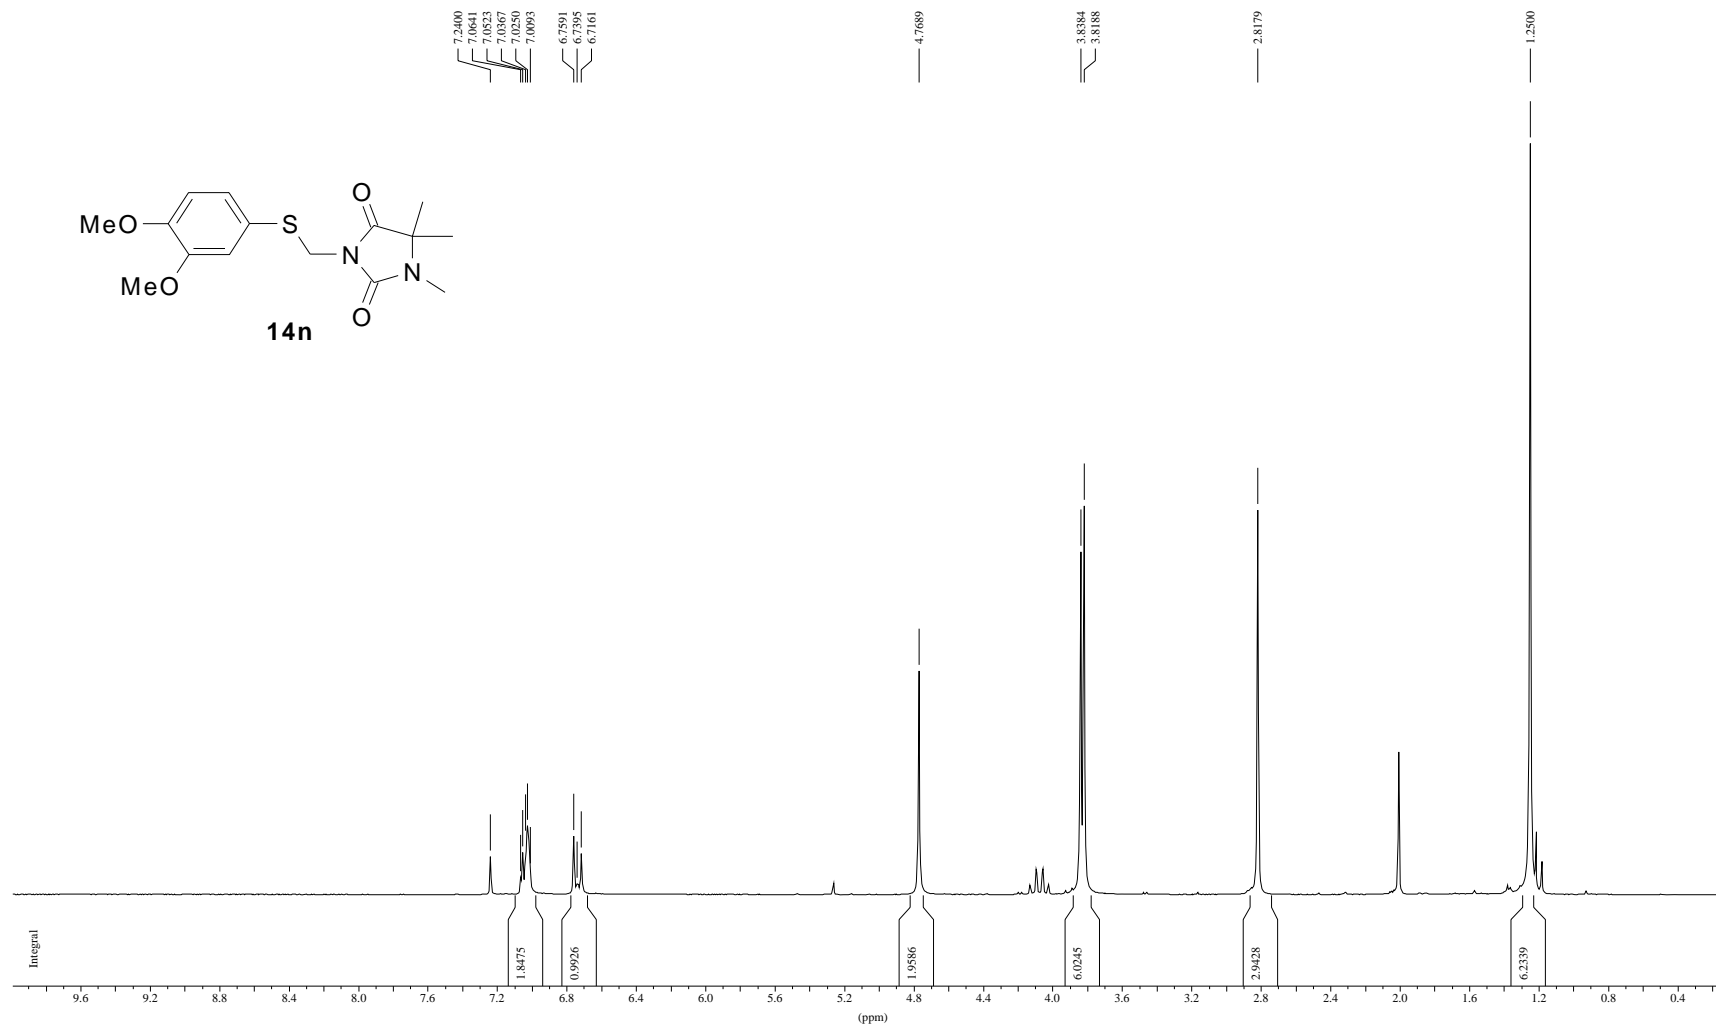

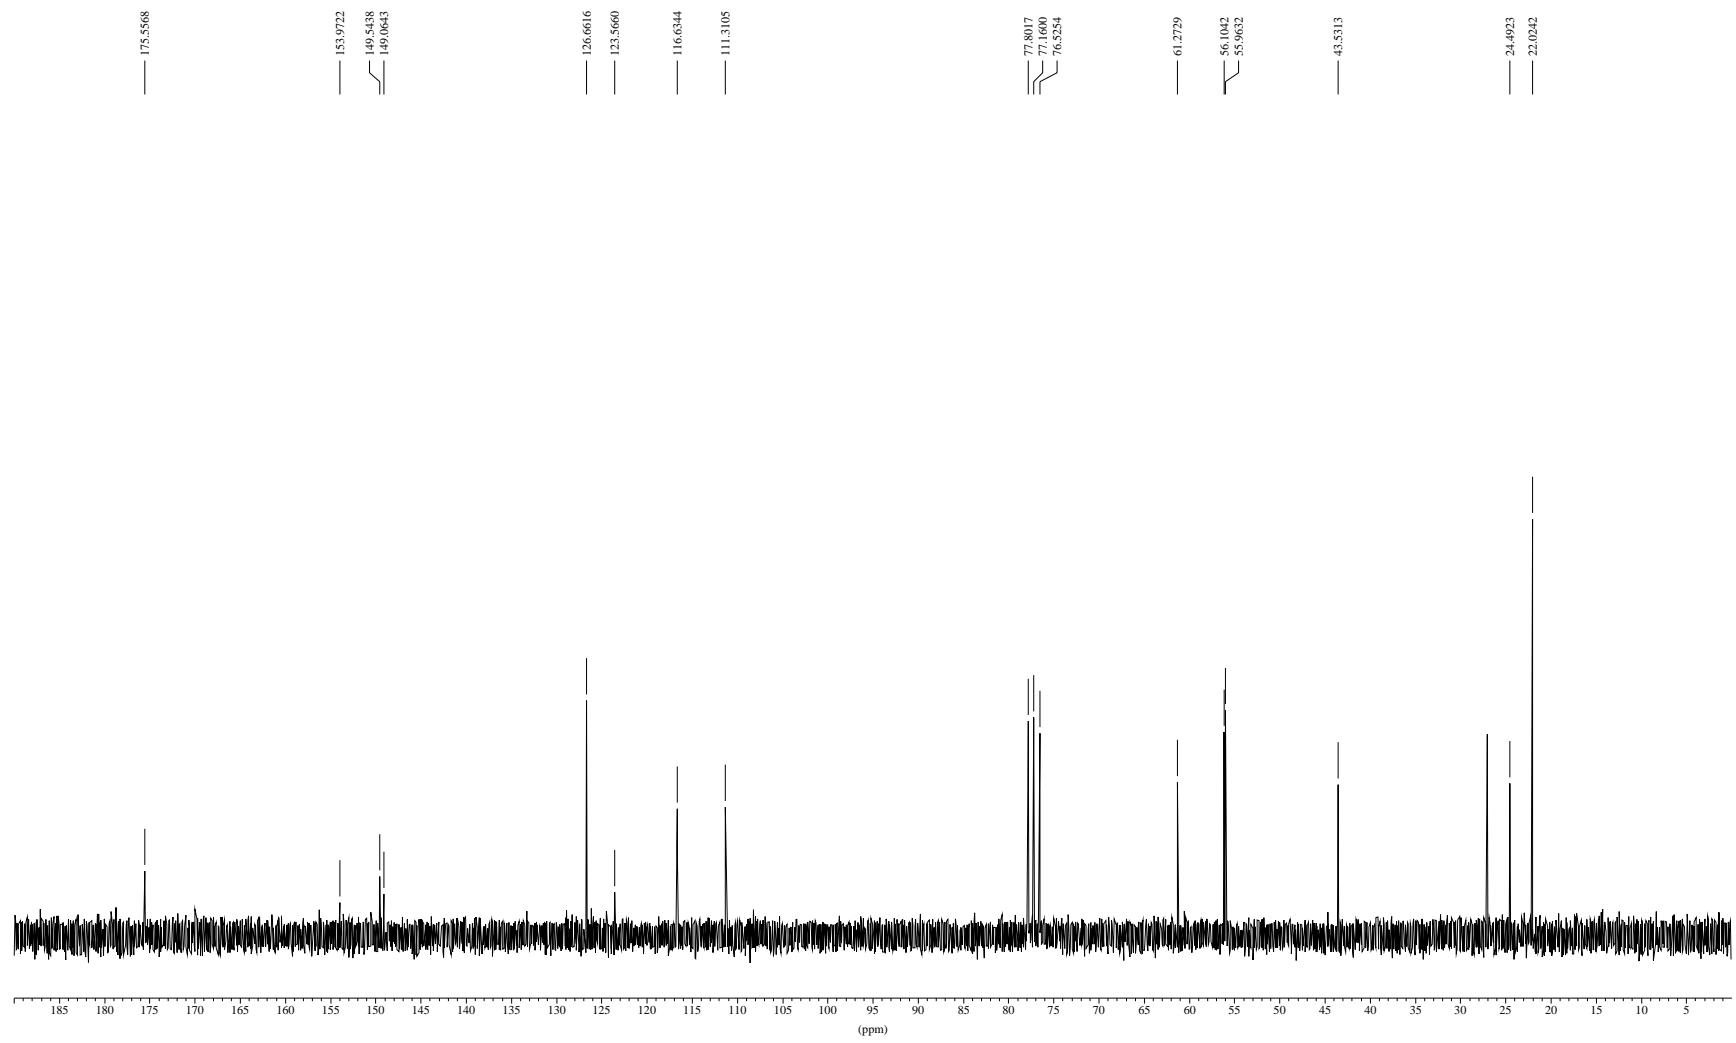

S100

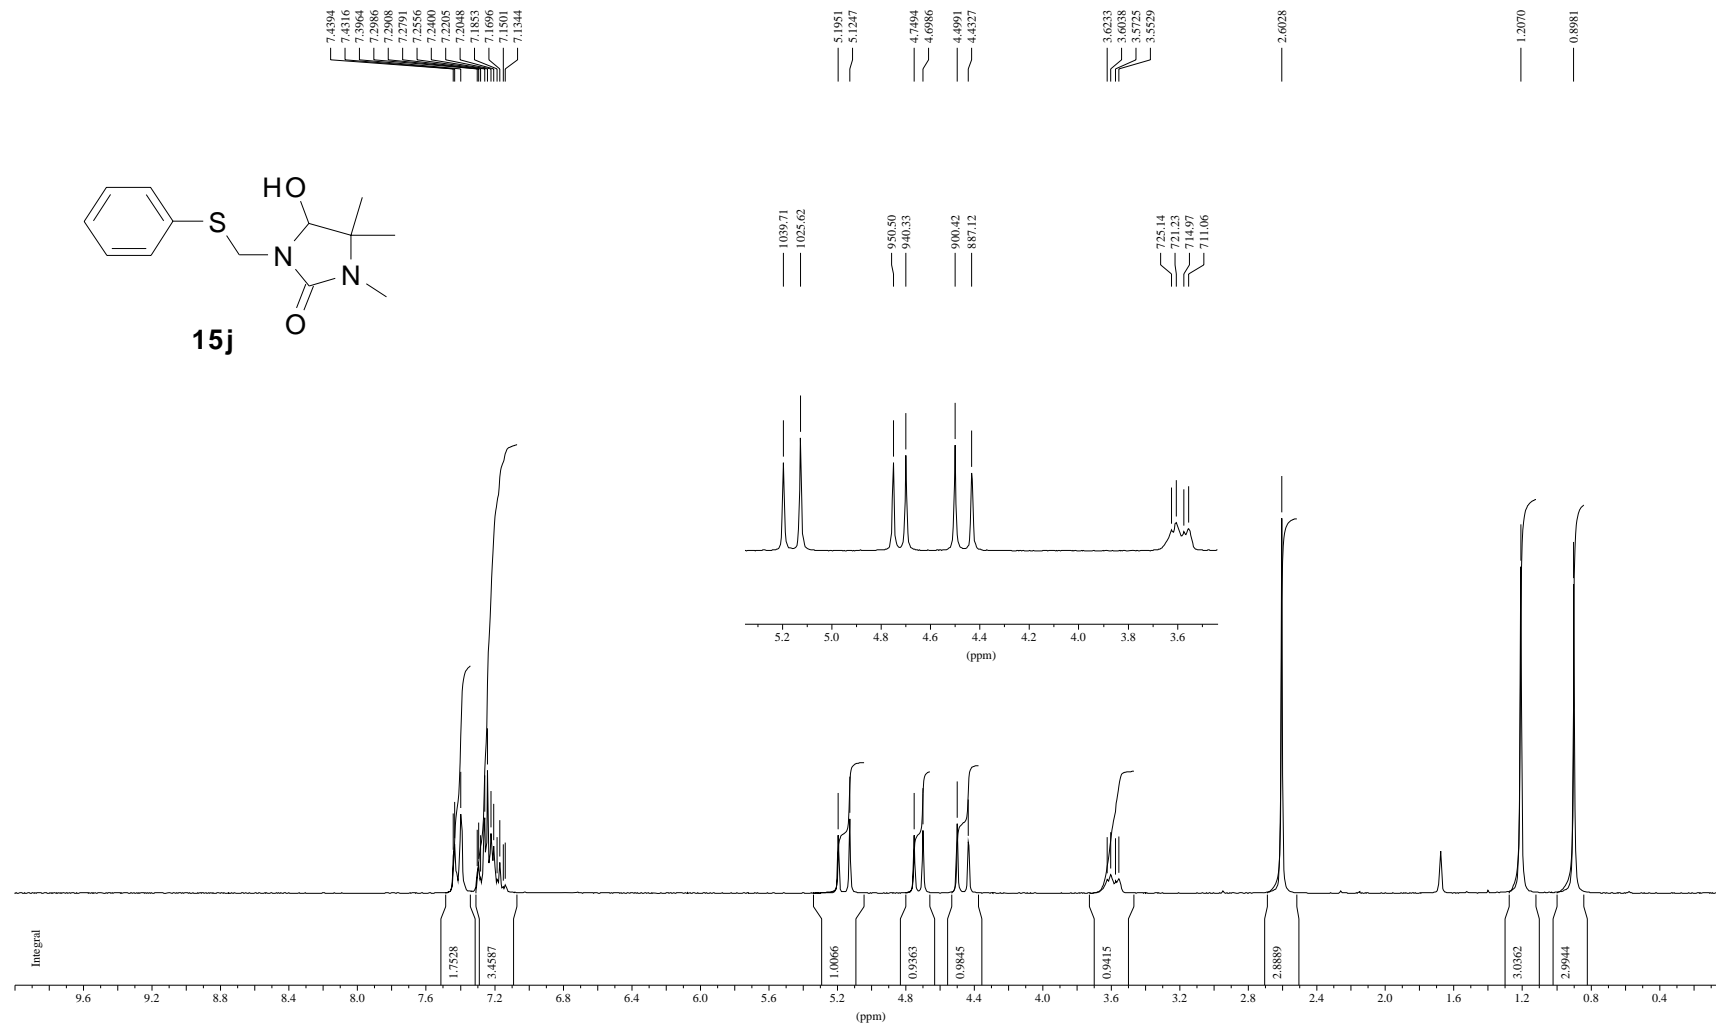

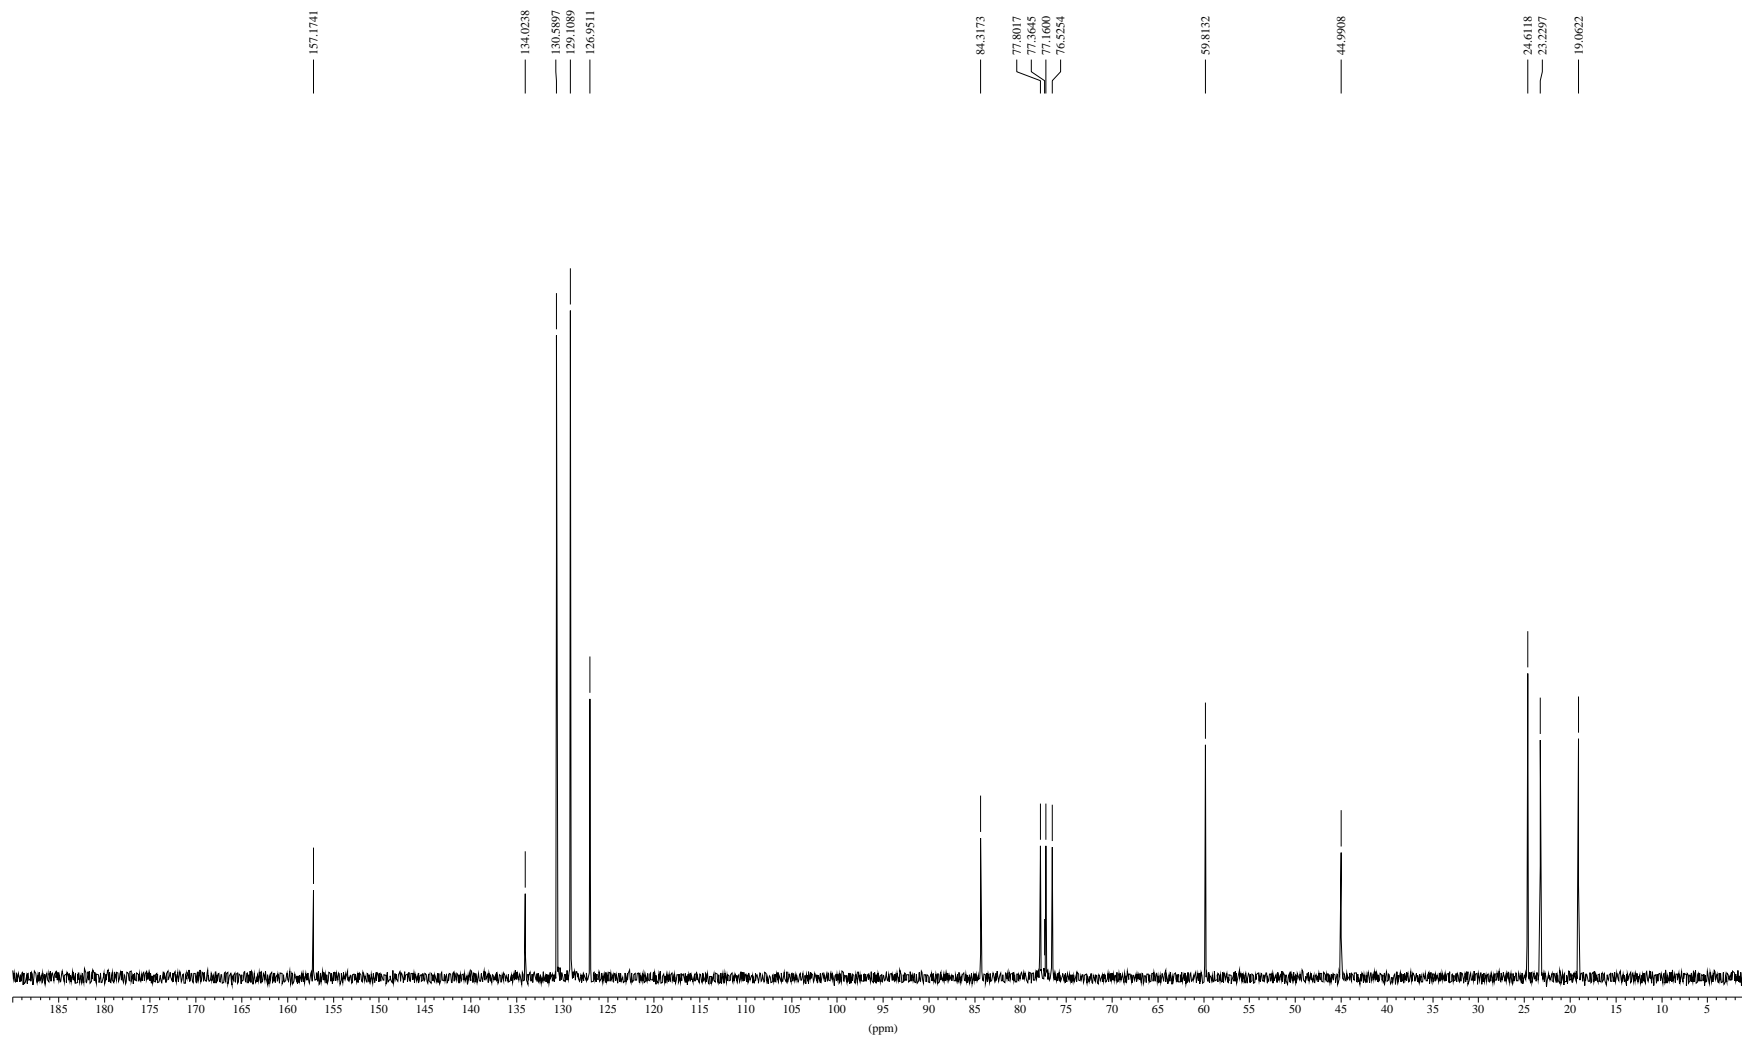

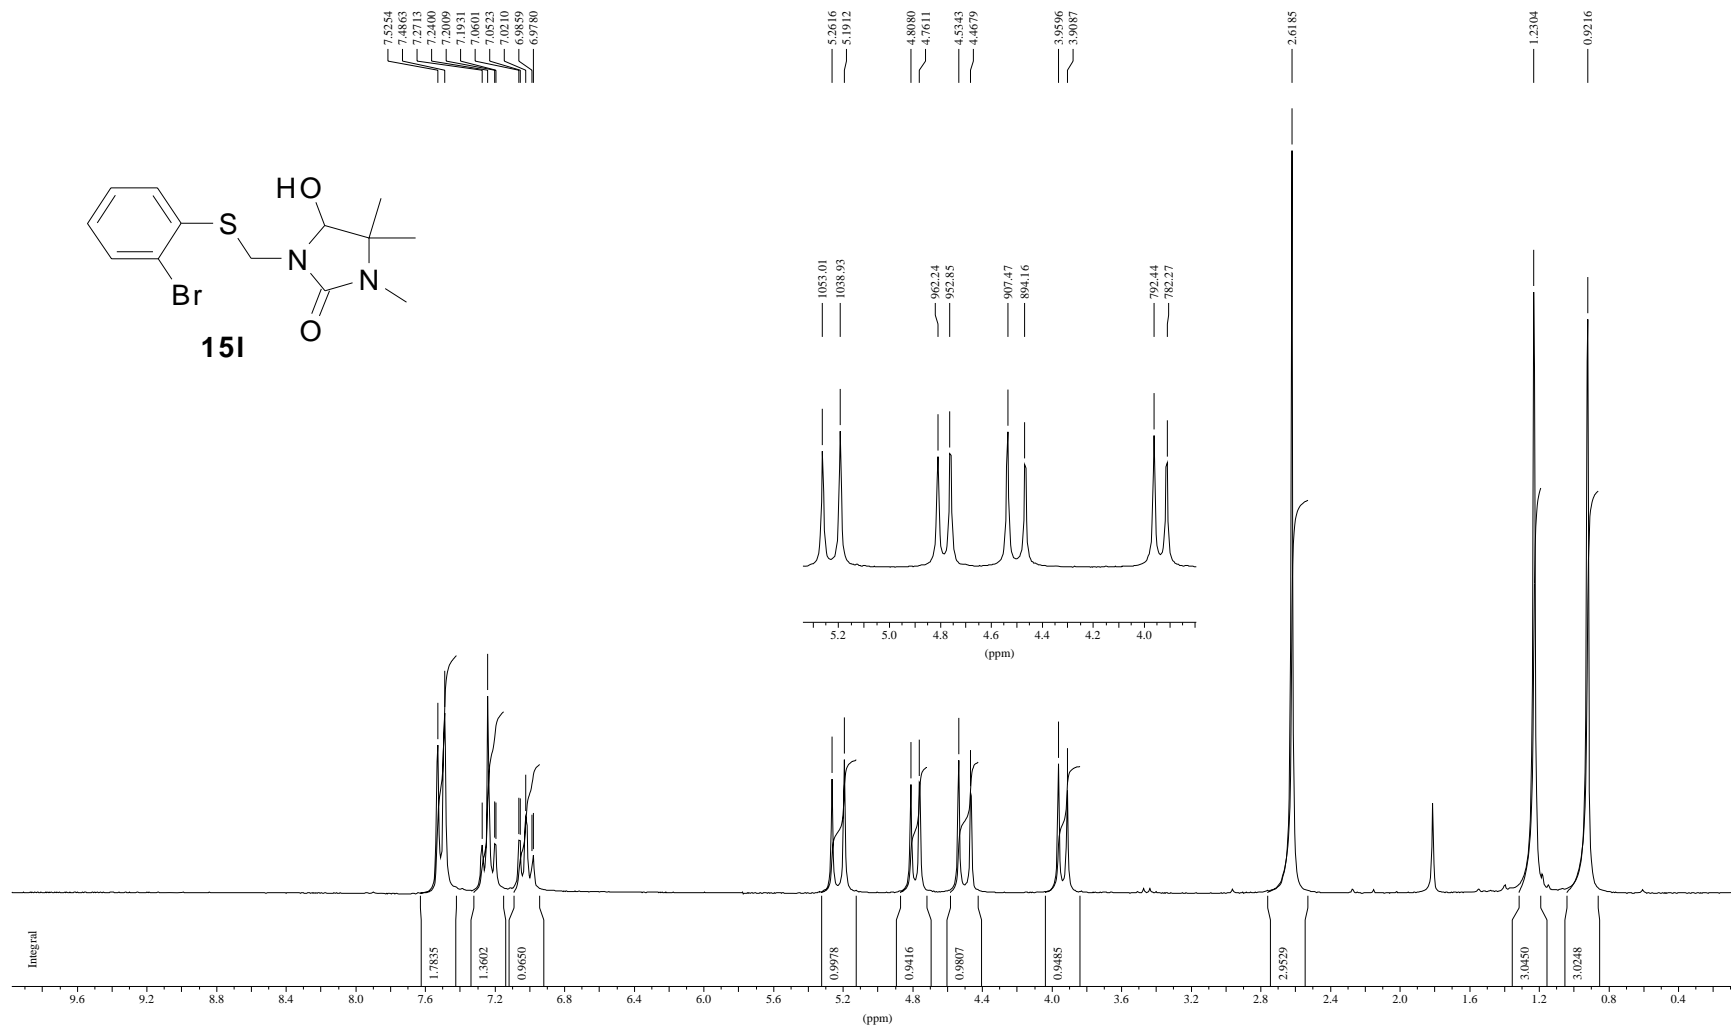

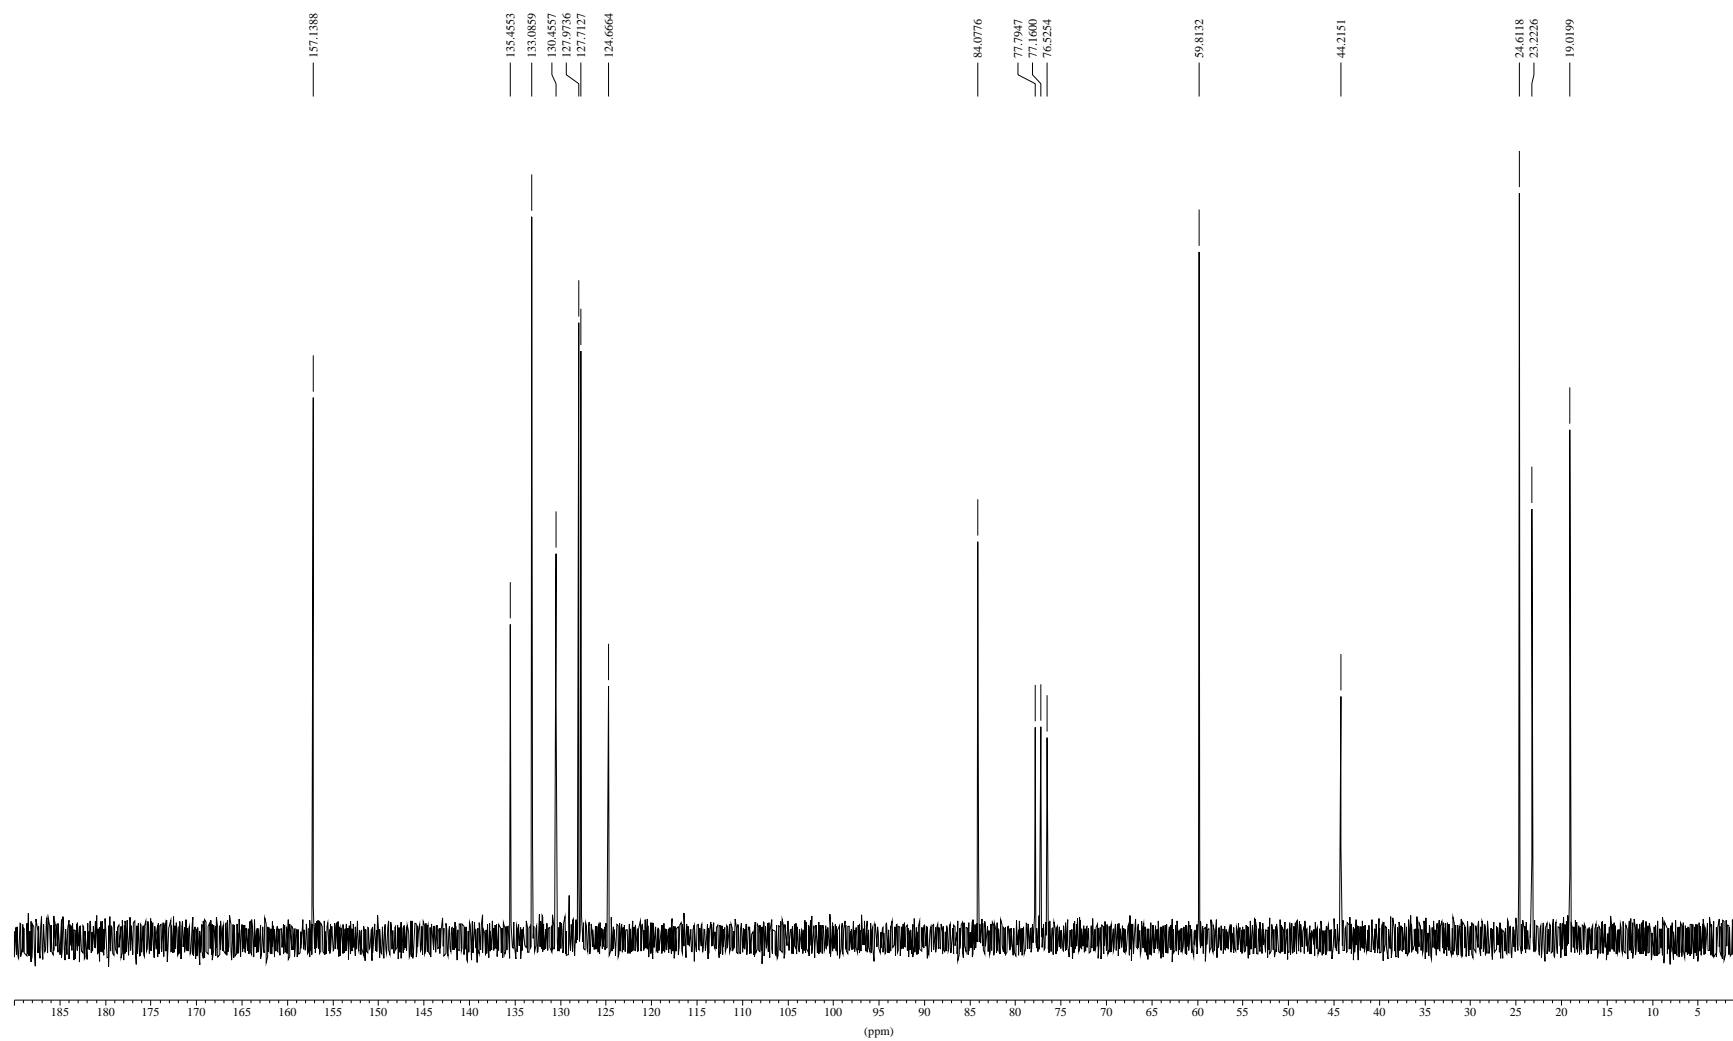



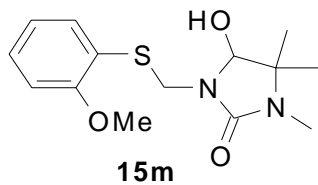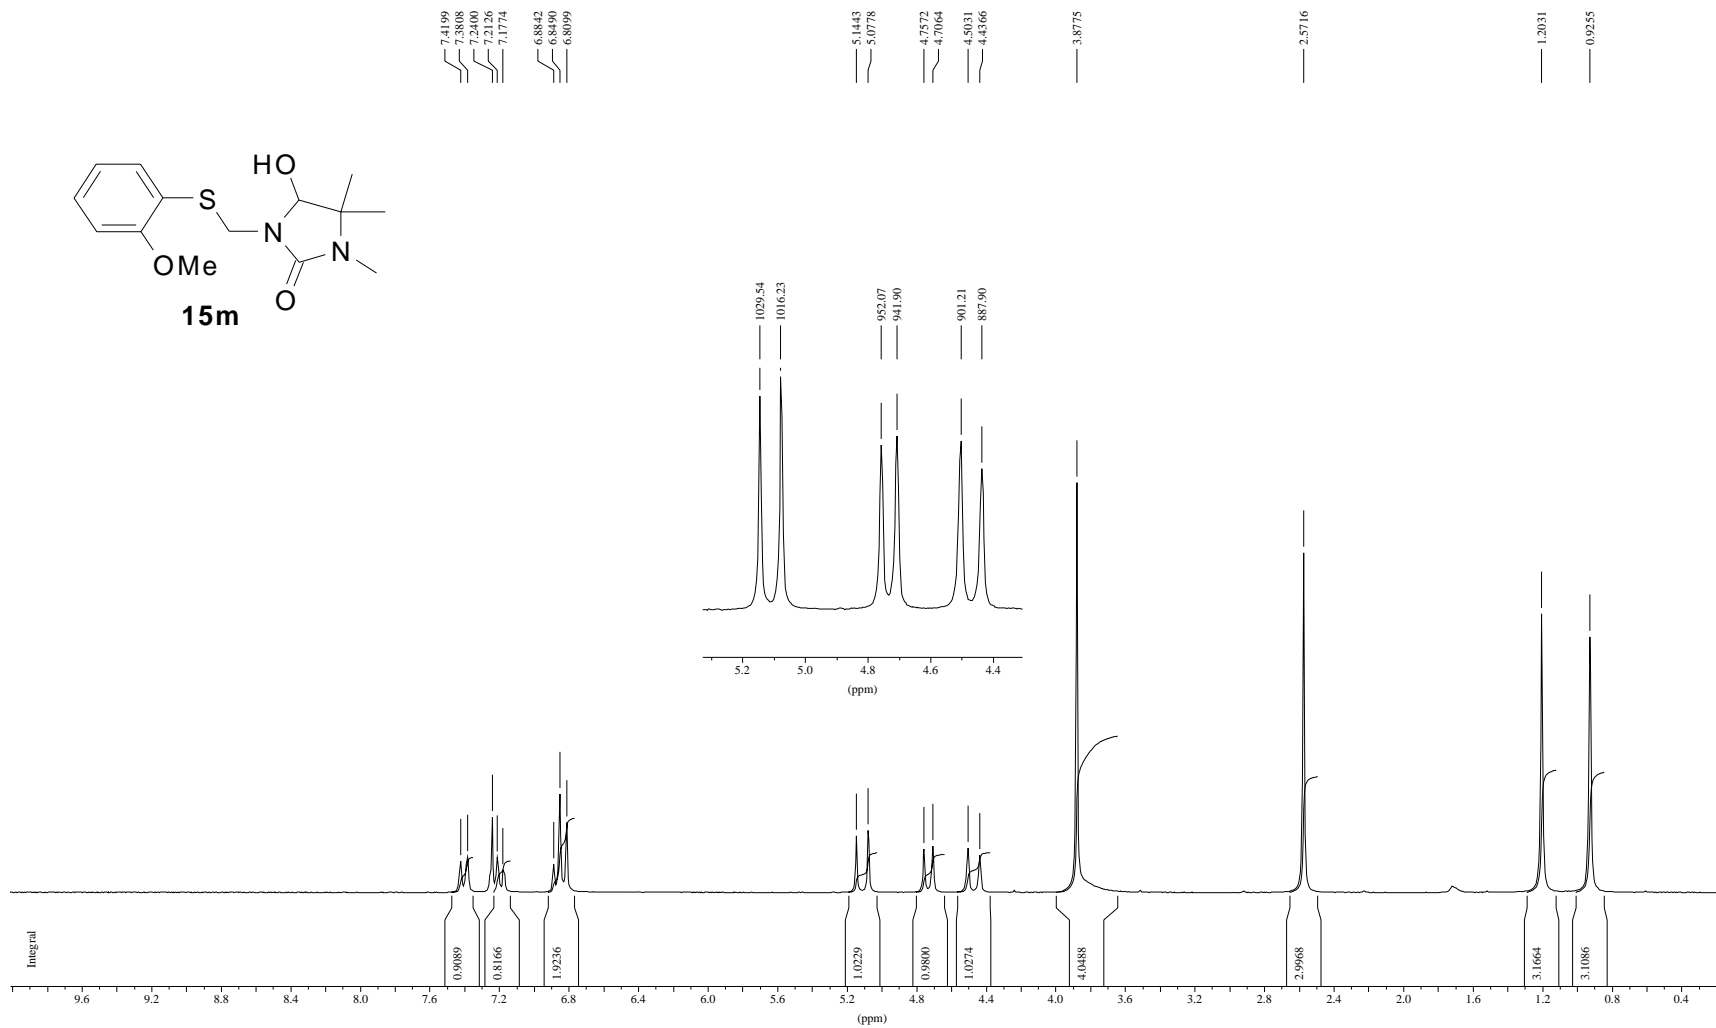

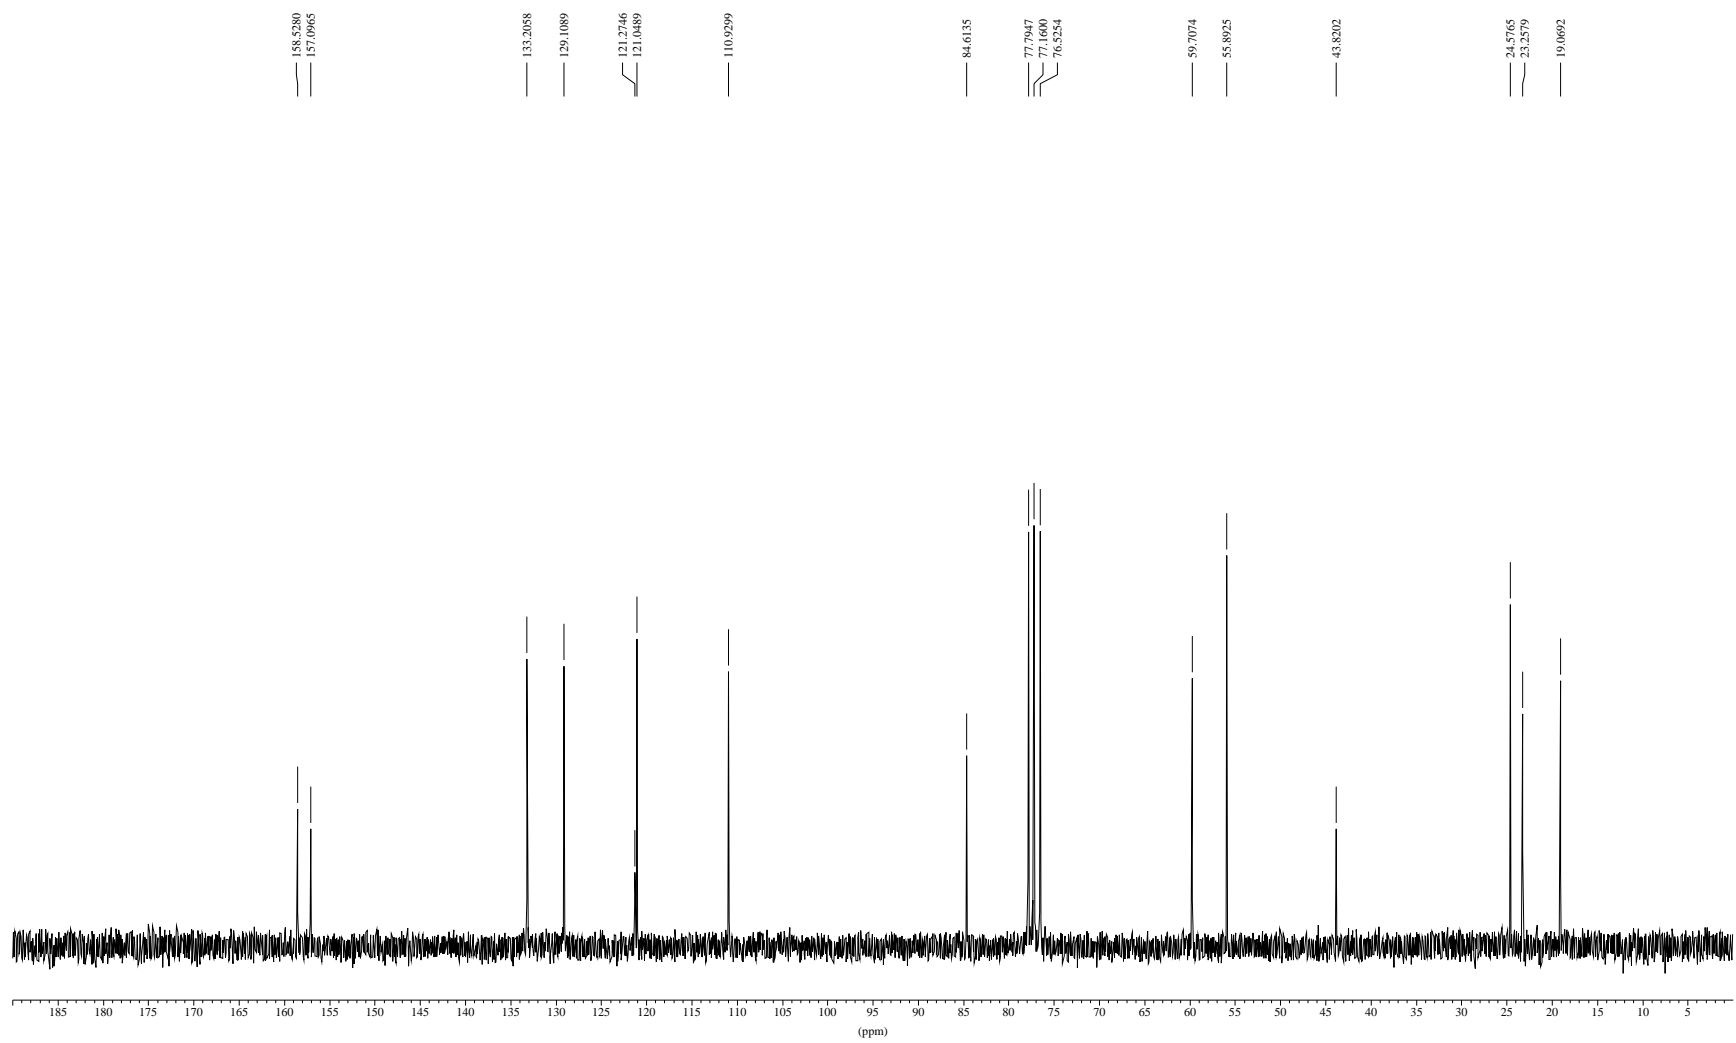

S106

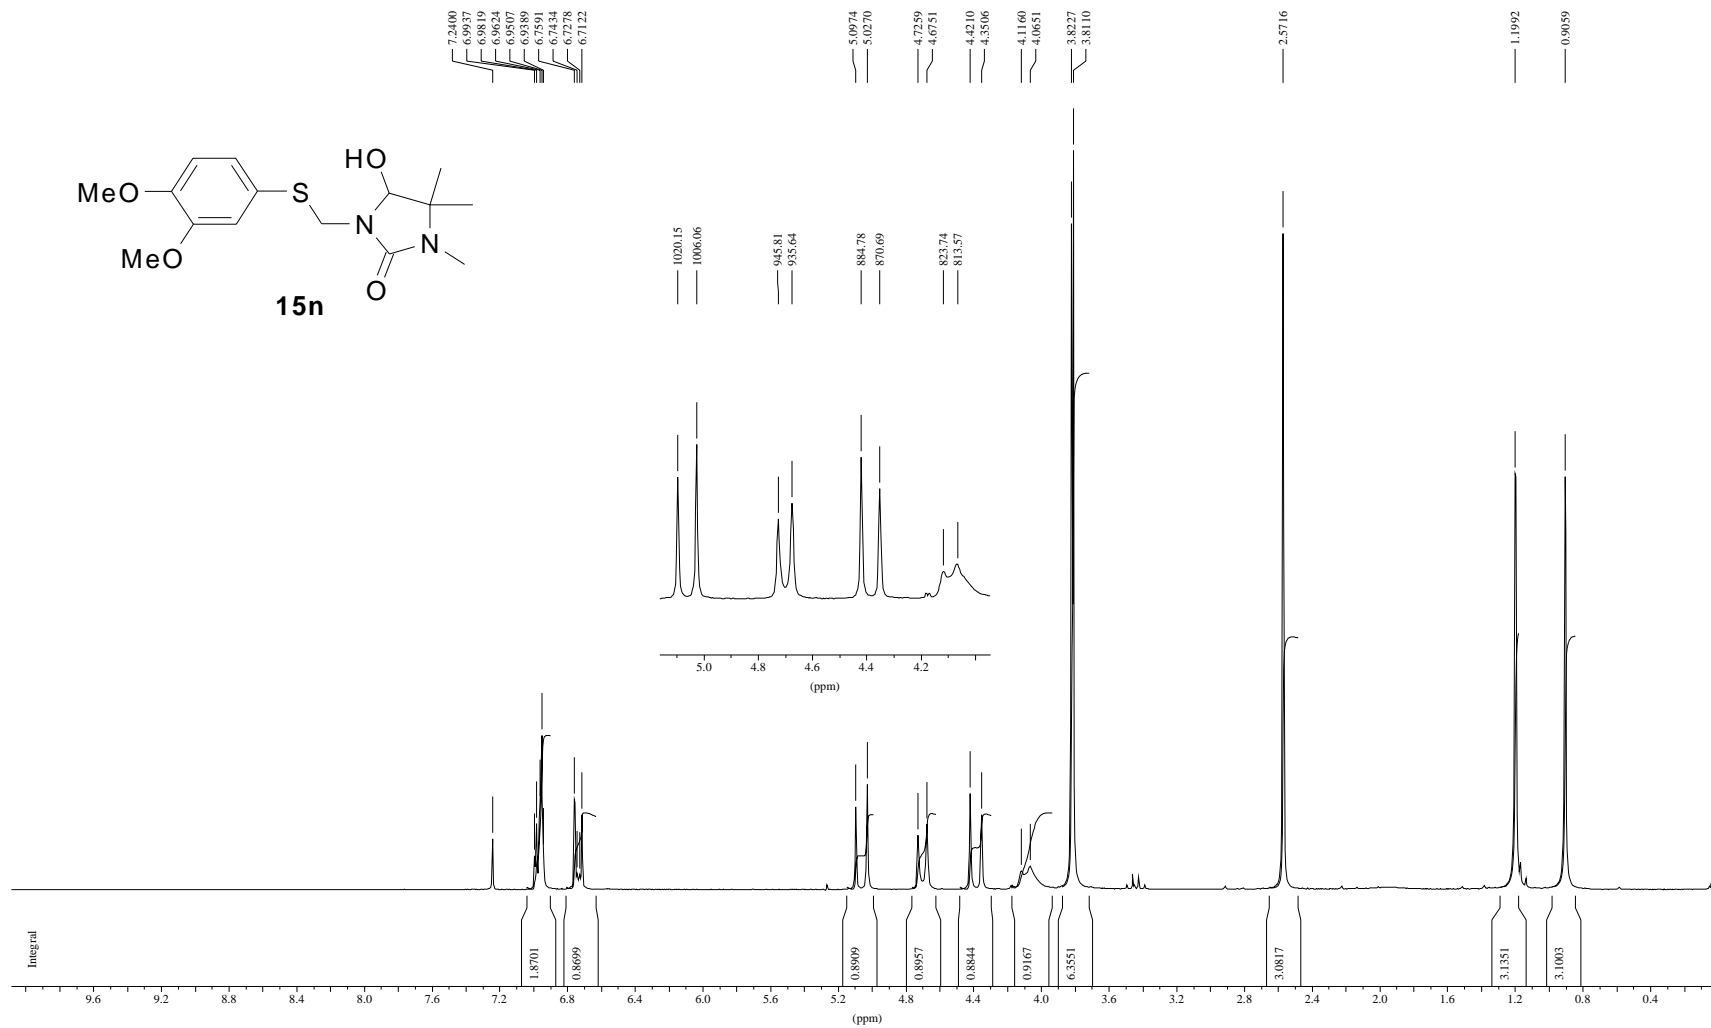

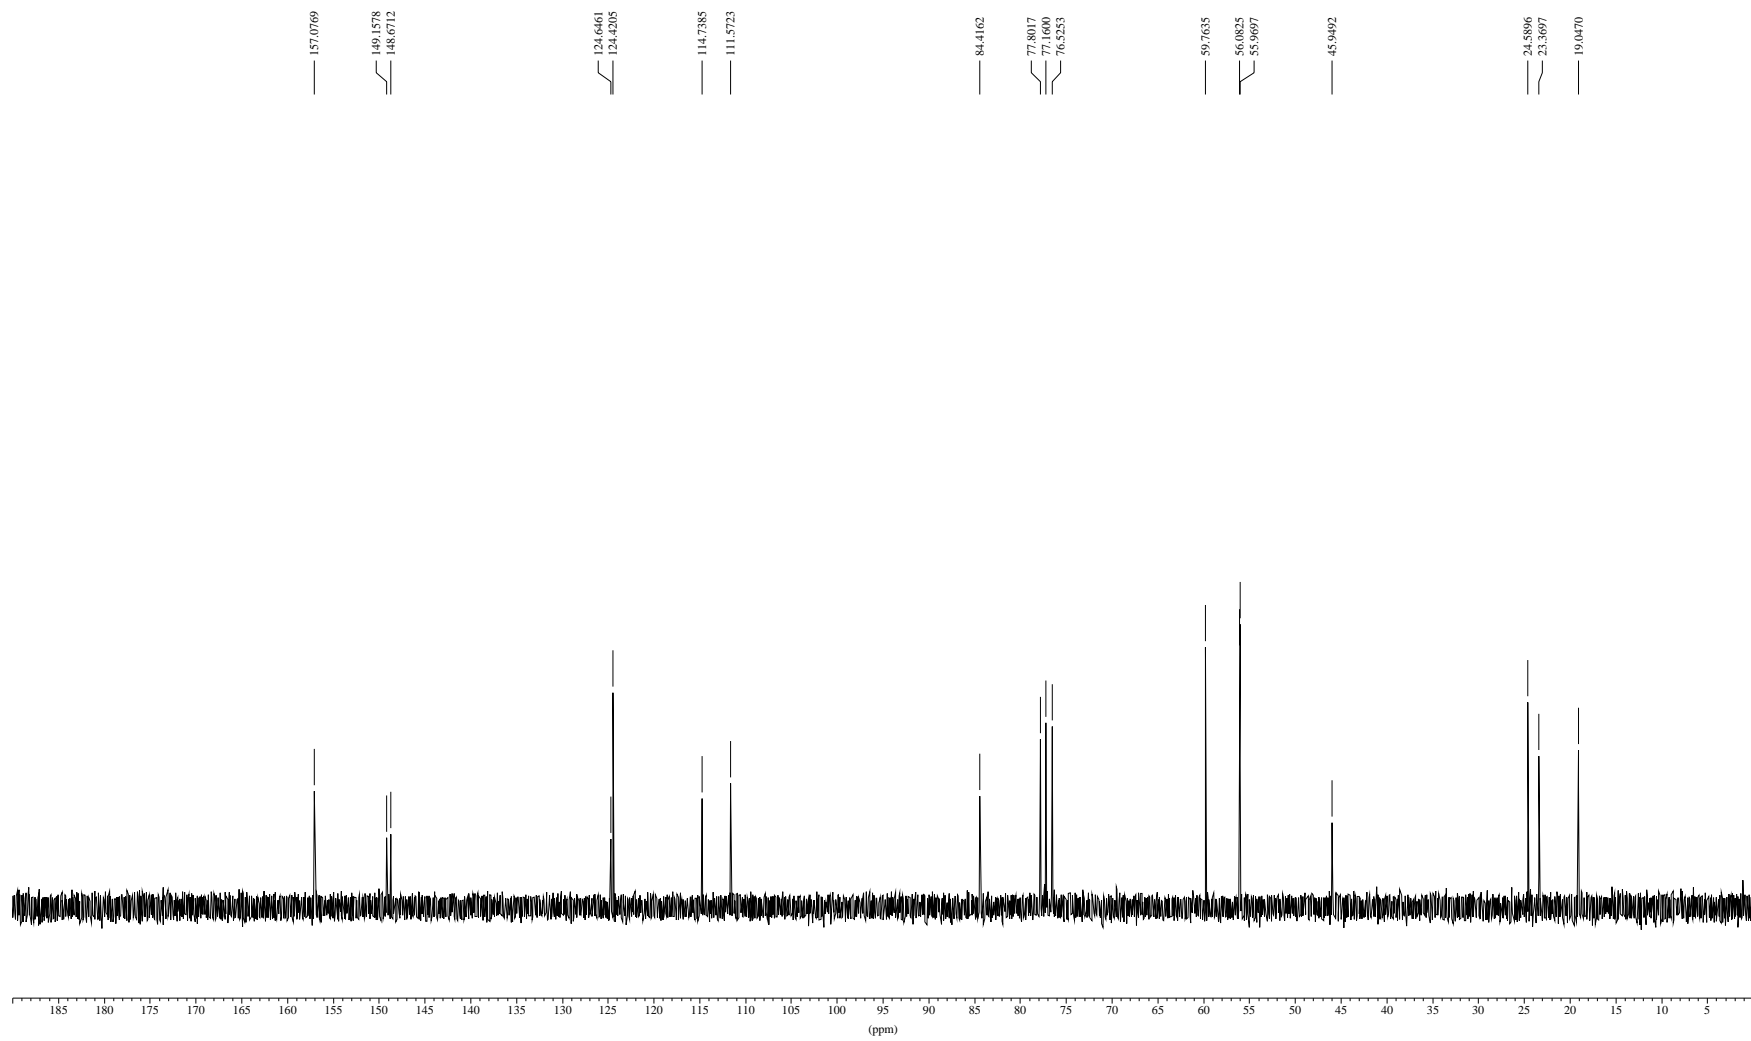

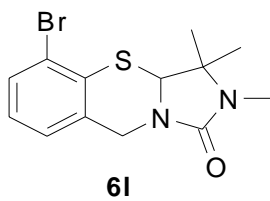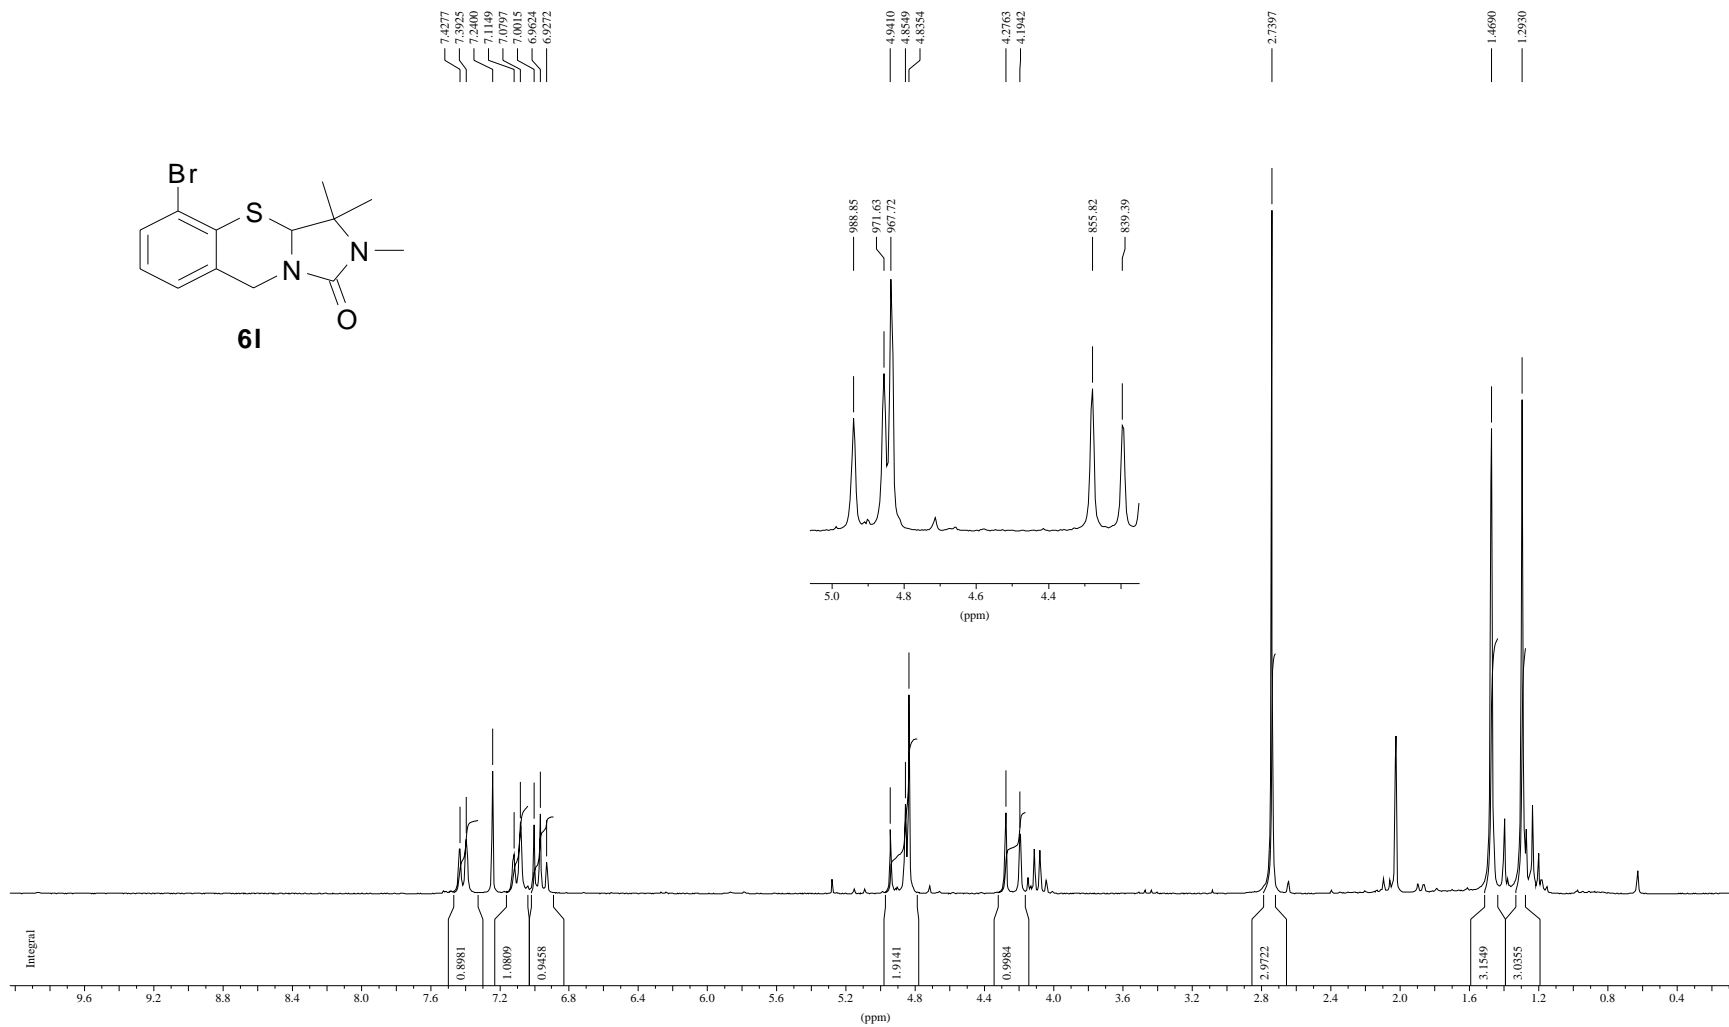

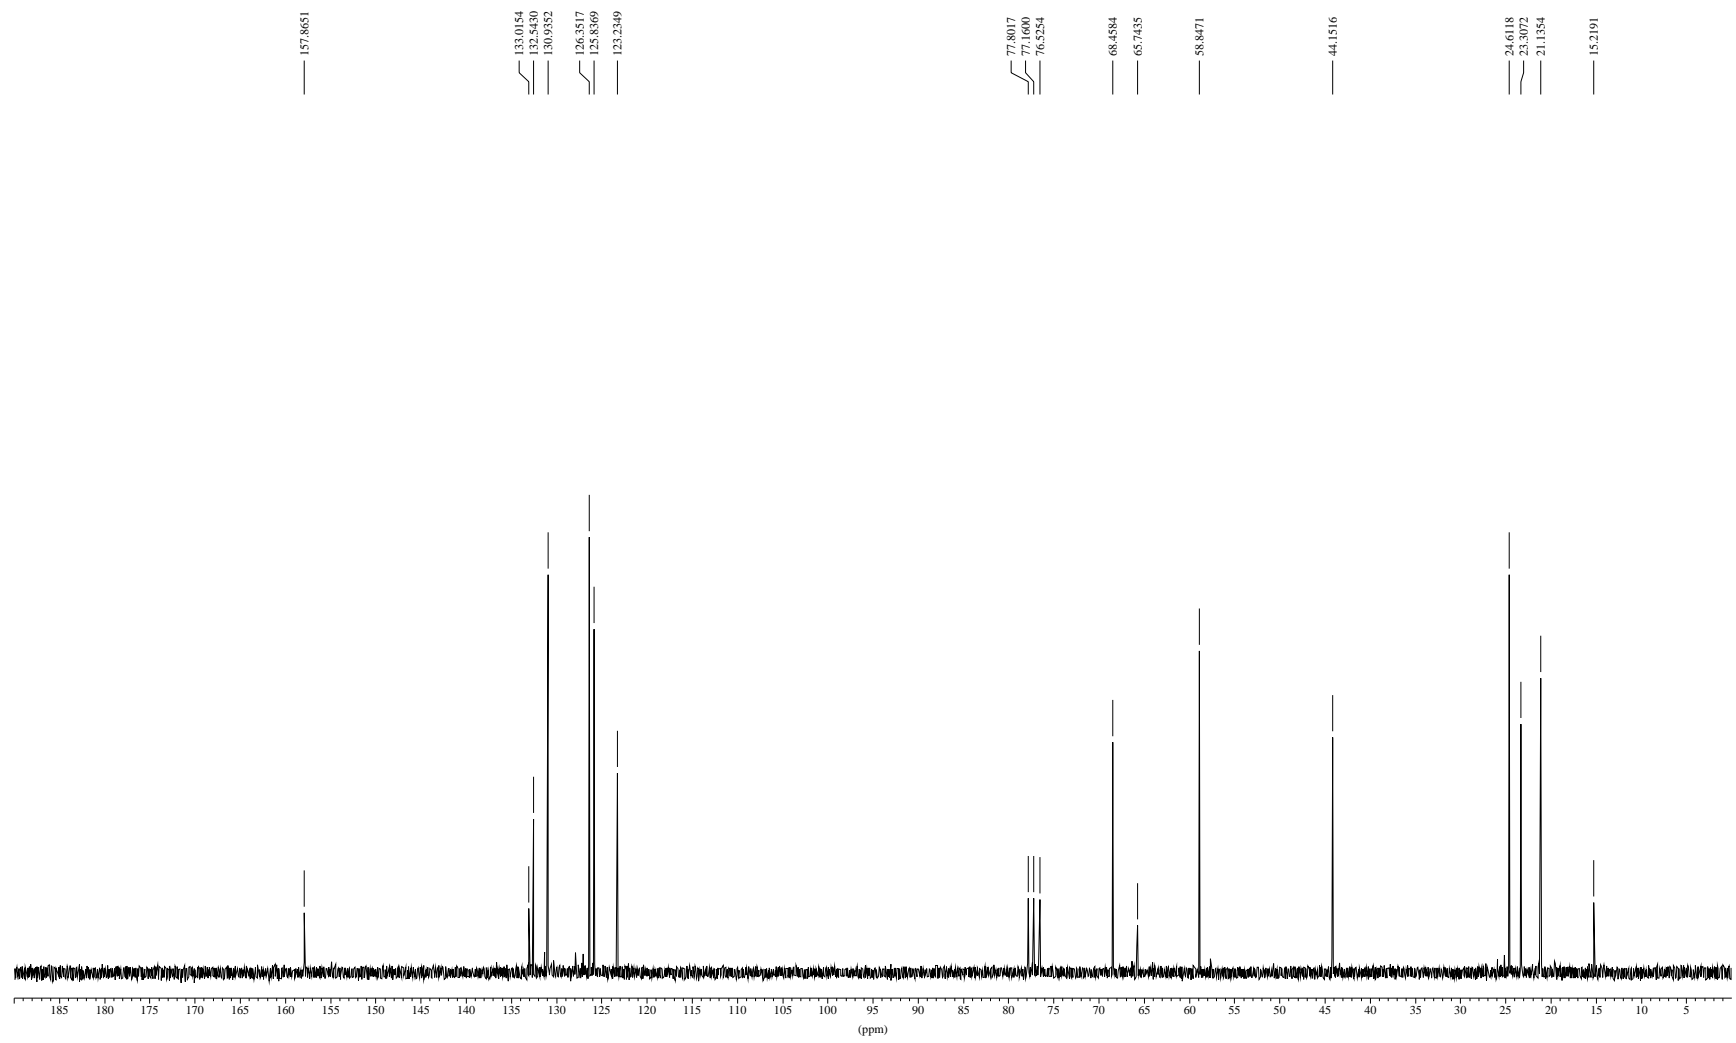

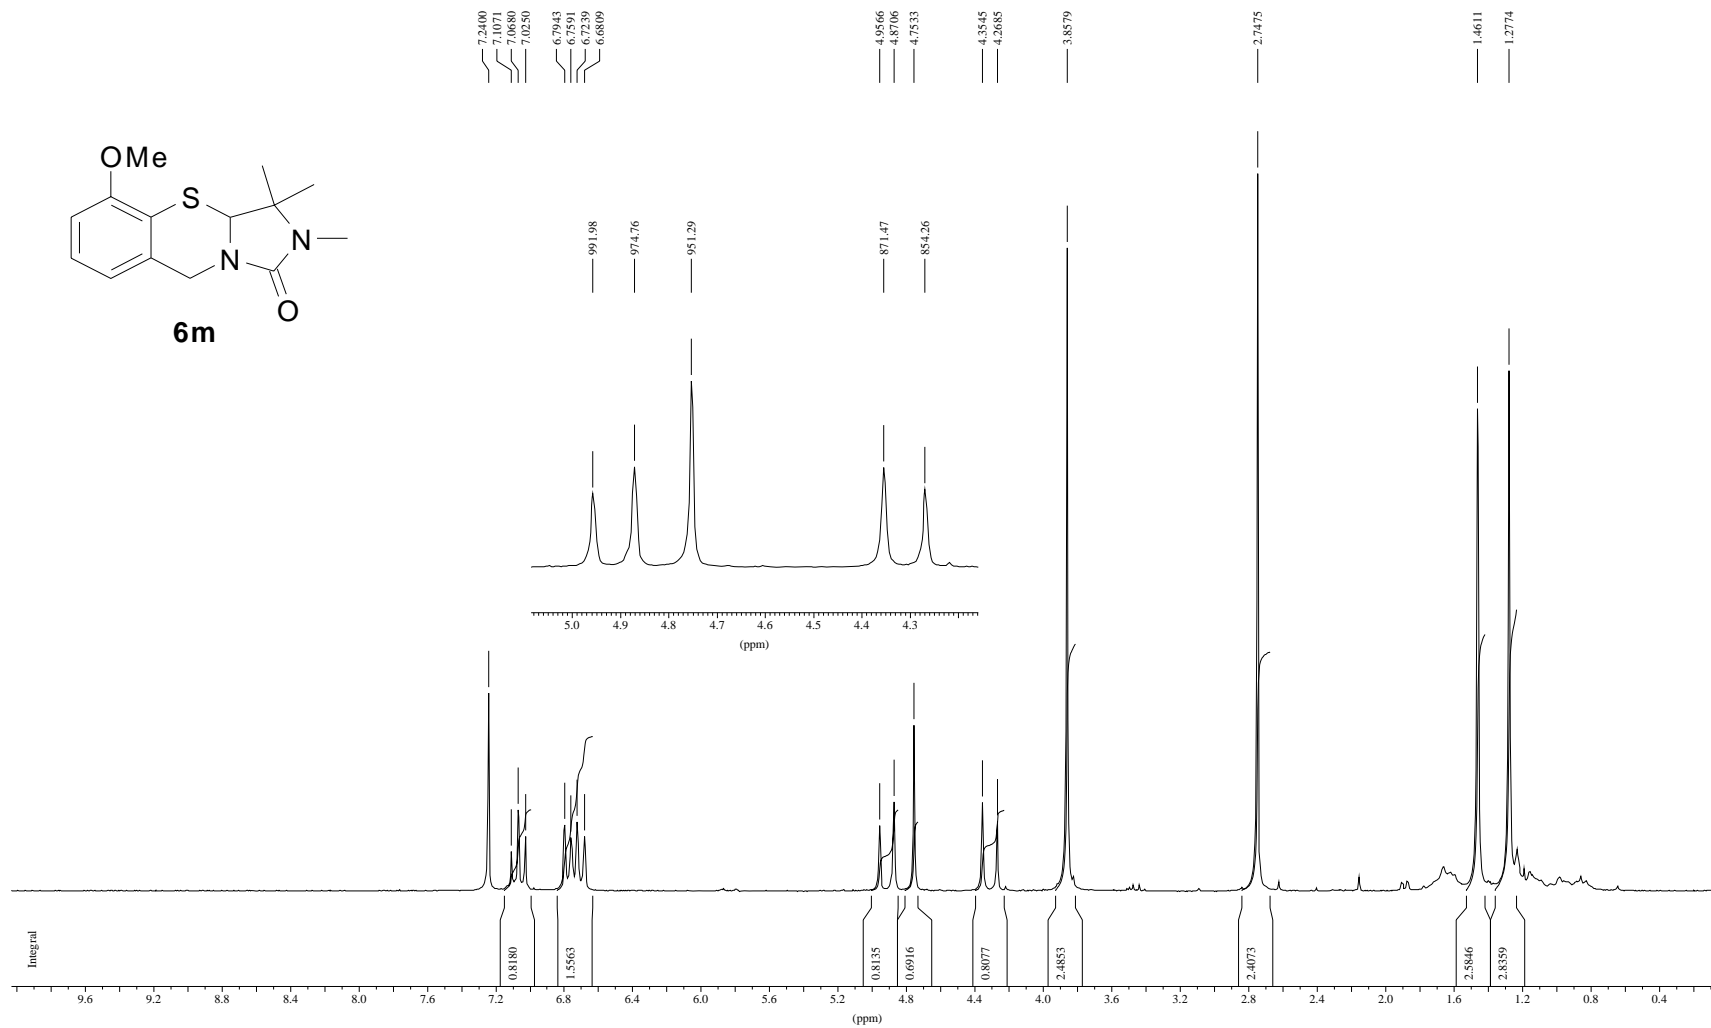

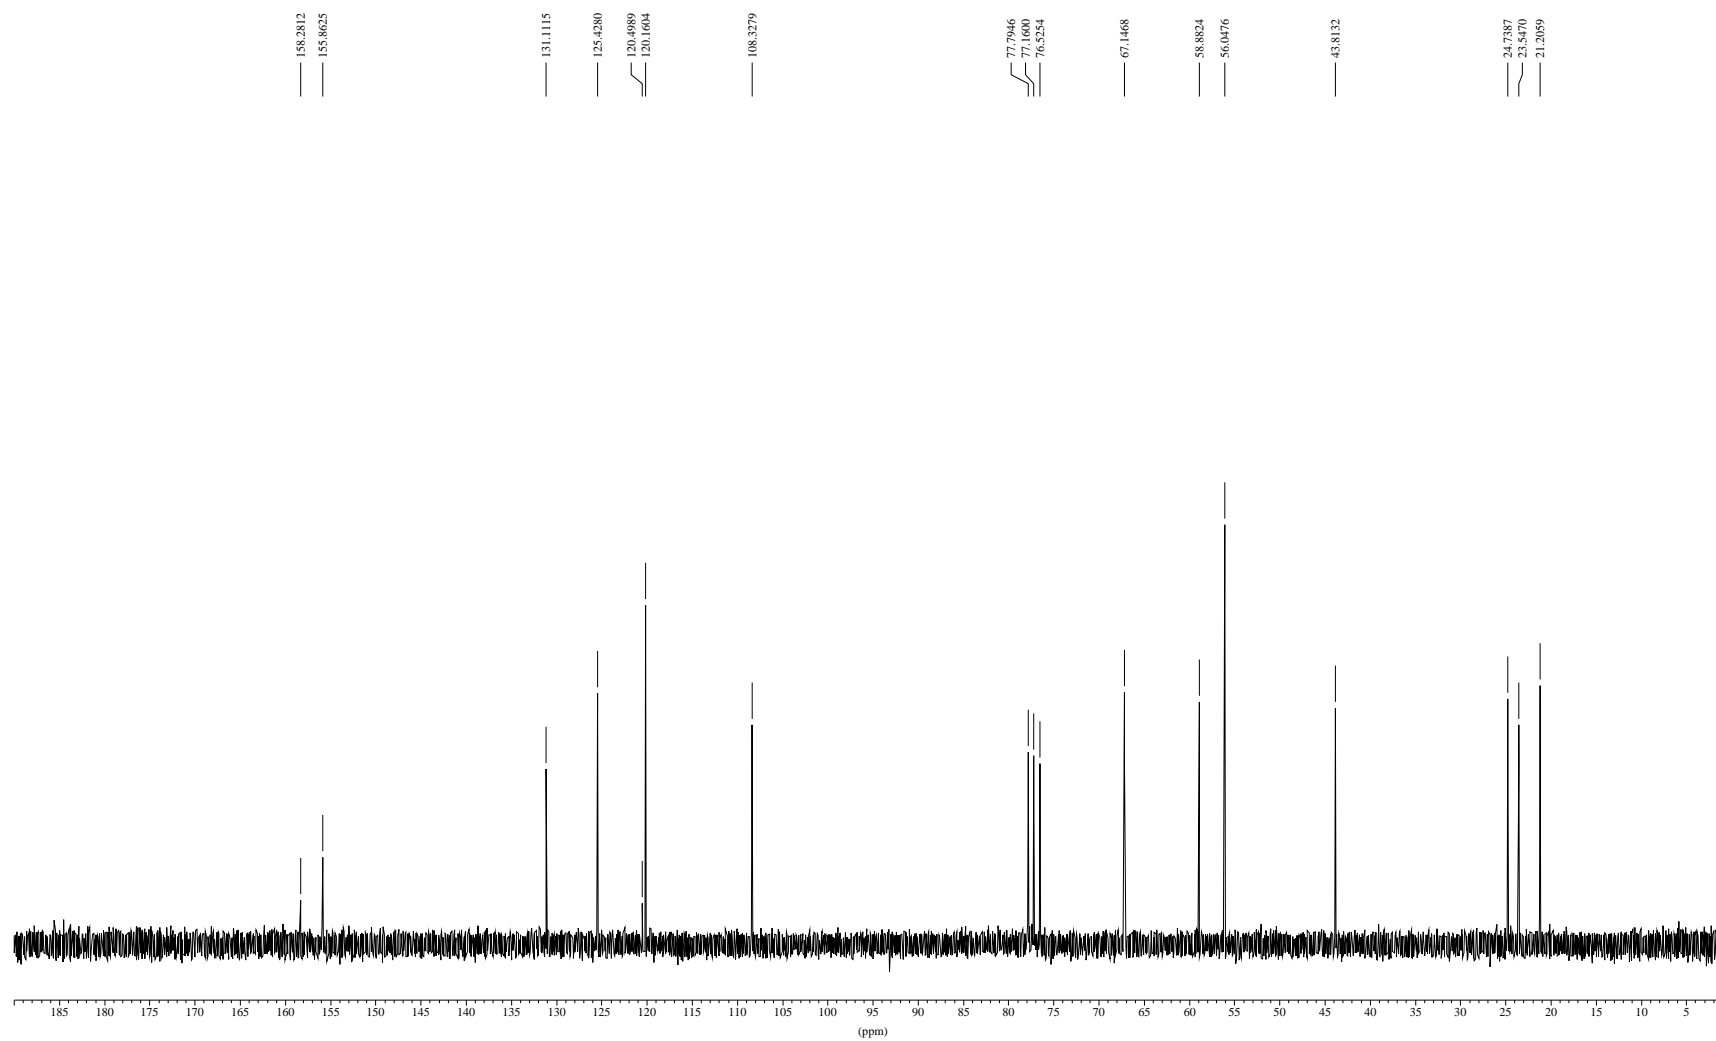



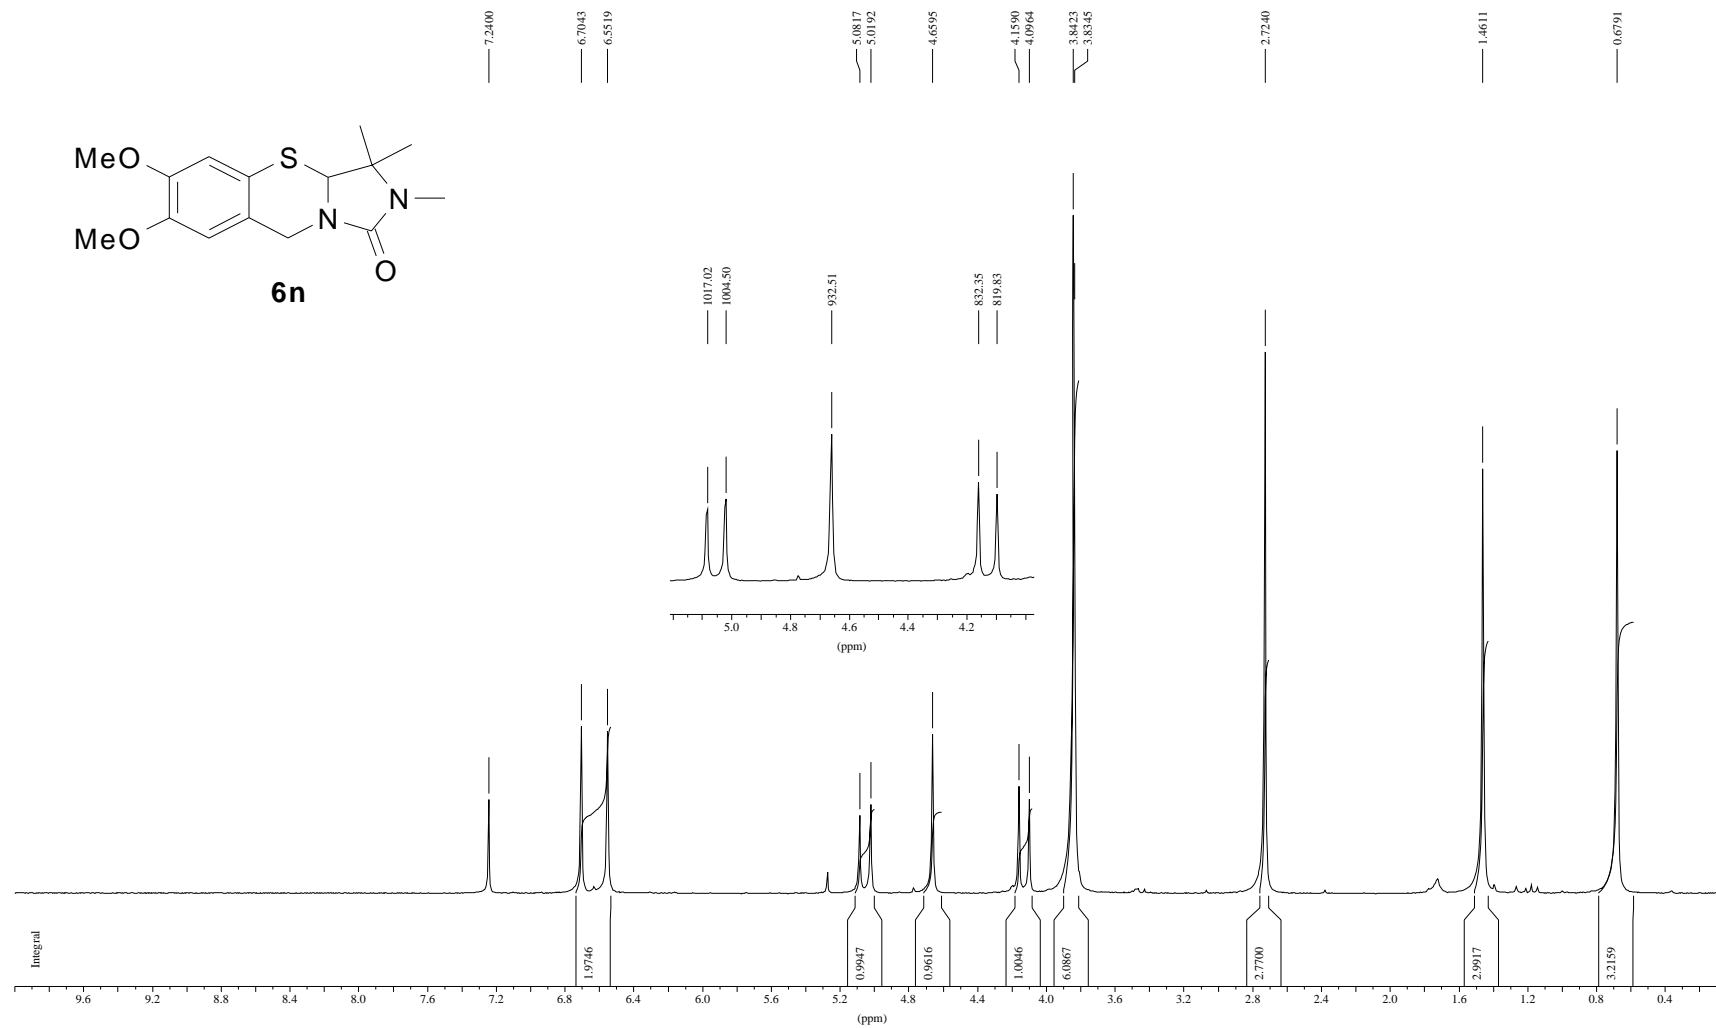

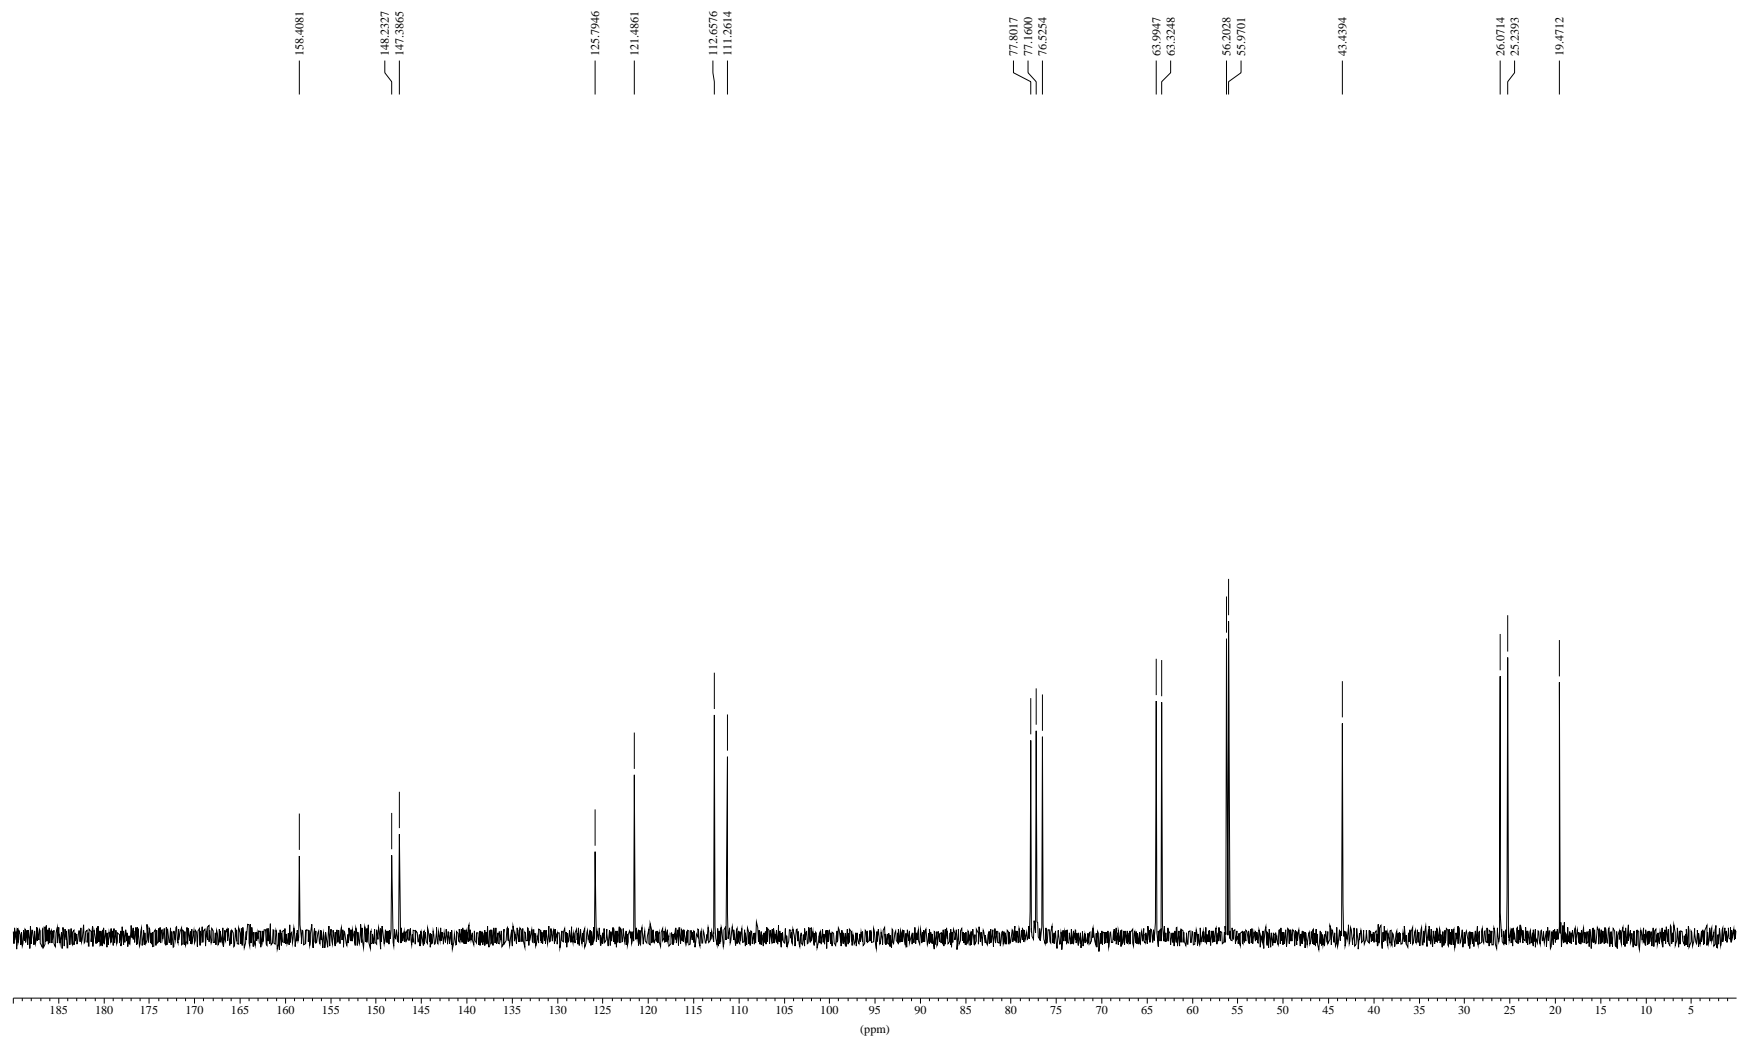

Supplement: b508214e.pdf [file b508214e.pdf]
